# Supplementary material
Source: PubMed Central journal article supplement (PMC7293824)
Supplement: NIHMS1591831-supplement-Supporting_Information.pdf [file NIHMS1591831-supplement-Supporting_Information.pdf]

## Supporting Information

### Highly Enantioselective, Hydrogen-Bond-Donor Catalyzed Additions to Oxetanes

Daniel A. Strassfeld<sup>‡</sup>, Zachary K. Wickens<sup>‡</sup>, Elias Picazo, and Eric N. Jacobsen\*

*Department of Chemistry and Chemical Biology, Harvard University, Cambridge, MA 02138, USA.*

\*Email: [jacobsen@chemistry.harvard.edu](mailto:jacobsen@chemistry.harvard.edu)

## Contents

|                                                    |      |
|----------------------------------------------------|------|
| General Information.....                           | S3   |
| Reaction Development and Optimization.....         | S4   |
| Kinetic Isotope Effect Experiments.....            | S9   |
| Synthesis and Characterization of Catalysts.....   | S15  |
| Synthesis and Characterization of Substrates.....  | S19  |
| Reaction Scope and Derivatizations.....            | S32  |
| Preparative-Scale Synthesis of Pretomanid.....     | S70  |
| X-Ray Crystallography.....                         | S74  |
| <sup>1</sup> H NMR Spectra of Known Compounds..... | S103 |
| NMR Spectra of Novel Compounds.....                | S115 |
| References.....                                    | S175 |

## General Information

### Methods:

All reactions were performed in round bottom flasks under a nitrogen (N<sub>2</sub>) atmosphere unless otherwise noted. Catalytic experiments were performed under N<sub>2</sub>, in oven-dried 1- or 2-dram vials with septum-lined caps. Stainless steel gas-tight syringes were used to transfer air- and moisture-sensitive liquids. Reactions were monitored by thin-layer chromatography (TLC) on Silica Gel 60 F254 plates (EMD) and visualized under UV light (254 nm) or with cerium ammonium molybdate or KMnO<sub>4</sub> upon heating. Flash chromatography was performed using SiliaFlash P60 (230-400 mesh, SiliCycle), and was conducted on a Biotage Isolera automated chromatography system.

### Materials and Reagents:

Commercial reagents were purchased from Sigma-Aldrich, MilliporeSigma, Alfa Aesar, Strem, Oakwood, Matrix Scientific, Synthox, Chem-Impex, Cambridge Isotope Laboratories, or TCI and used as received unless otherwise noted. Reaction solvents (*t*-BuOMe, Et<sub>2</sub>O, THF, 1,4-dioxane, CH<sub>2</sub>Cl<sub>2</sub>, toluene, and DMF) were dried by passing through columns of activated alumina. Deuterated solvents CDCl<sub>3</sub> and (CD<sub>3</sub>)<sub>2</sub>SO (Cambridge Isotope Laboratories), and HPLC solvents (EMD) were used without purification.

### Instrumentation:

Proton nuclear magnetic resonance (<sup>1</sup>H NMR) spectra and proton-decoupled carbon nuclear magnetic resonance (<sup>13</sup>C{<sup>1</sup>H} NMR) spectra were recorded on a Varian Inova 500 (500 MHz), Inova 600 (600 MHz), or Inova 400 (400 MHz) spectrometer at ambient temperature. All chemical shifts (δ) are reported in parts per million (ppm) downfield from tetramethylsilane. Proton resonances are referenced to residual protium in the NMR solvent (CHCl<sub>3</sub> = 7.26 ppm, DMSO = 2.50 ppm). Carbon resonances are referenced to the carbon resonances of the NMR solvent (CDCl<sub>3</sub> = 77.16 ppm, (CD<sub>3</sub>)<sub>2</sub>SO = 39.52 ppm). Chemical shifts for fluorine-19 nuclear magnetic resonance (19F NMR) were recorded on Varian Inova 400 (400 MHz) or Inova 500 (500 MHz) spectrometer and are reported in parts per million downfield from chlorotrifluoromethane. Data are represented as follows: chemical shift, multiplicity (br = broad, s = singlet, d = doublet, t = triplet, q = quartet, m = multiplet), coupling constants (*J*) in Hertz (Hz), integration. Infrared (IR) spectra were obtained using a Bruker Alpha FTIR spectrometer equipped with an attenuated total reflectance (ATR) single reflection unit. Optical rotations ([α]) were measured using a 1 mL cell with a 0.5 dm path length on a Jasco DIP 370 digital polarimeter at 589 nm (sodium D line) at ambient temperature. Mass spectral (MS) data were obtained by submission to the Harvard FAS Division of Science Small Molecule Mass Spectrometry facility. High-performance liquid chromatography (HPLC) analysis was performed using an Agilent 1200 series quaternary HPLC system with commercially available ChiralPak and ChiralCel columns. Enantioenriched and racemic samples were injected as solutions in 5 : 1 hexanes : *i*-PrOH. GC analysis was performed using an Agilent 7890A GC system with commercially-available Chirasil-Dex CB and Agilent HP-5 columns. Supercritical fluid chromatography (SFC) analysis was performed using a JASCO SFC-4000 SFC system with commercially-available ChiralPak columns.

### Abbreviations Used:

acac = acetoacetate, aq = aqueous, boc = *tert*-butyloxycarbonyl, BRSM = based on recovered starting material, c = concentration (in grams/100 mL), calc = calculated, cm<sup>-1</sup> = wavenumber, DMF = dimethylformamide, dppf = bis(diphenylphosphino)ferrocene, d.r. = diastereomer ratio, e.e. = enantiomeric excess, ent = enantiomer, equiv = equivalents, FTIR = Fourier-transform infrared spectroscopy, GC = gas chromatography, hr = hours, HATU = 1-[Bis(dimethylamino)methylene]-1*H*-1,2,3-triazolo[4,5-*b*]pyridinium 3-oxid hexafluorophosphate, *N*-[(Dimethylamino)-1*H*-1,2,3-triazolo-[4,5-*b*]pyridin-1-ylmethylene]-*N*-methylmethanaminium hexafluorophosphate *N*-oxide, HMDS = hexamethyldisilazne, HPLC = high-performance liquid chromatography, min = minutes, m/z = mass to charge ratio, n/d = not determined, NMR = nuclear magnetic resonance, Ph = phenyl, phth = phthalyl, pin = pinacol, *p*-Ts = para-toluenesulfonyl, r.t. = room temperature, sat = saturated, 2-Me-THF = 2-methyltetrahydrofuran, THF = tetrahydrofuran, TLC = thin layer chromatography, TMEDA = tetramethylethylenediamine, TMS = trimethylsilyl, Tol = tolyl, wt = weight, xantphos = 4,5-Bis(diphenylphosphino)-9,9-dimethylxanthene

## Reaction Development and Optimization

**General Procedure A (reaction optimization and development at 0.1 mmol scale):** An oven-dried 1-dram vial was equipped with a magnetic stir-bar and closed with a screw-cap containing a rubber septum. The vial was charged with oxetane **1a** (13.4 mg, 0.1 mmol, 1 equiv.), catalyst **3a** (1.4 mg, 0.002 mmol, 0.02 equiv.), mesitylene as an internal standard (10  $\mu$ L, 0.072 mmol, 0.72 equiv.), and *t*-BuOMe (1 mL, 0.1 M). The headspace of the vial was flushed with nitrogen for 15 seconds and then the vial was cooled to  $-78\text{ }^{\circ}\text{C}$  in a dry ice-acetone bath, allowing 10 minutes for the temperature to equilibrate. A micro-syringe was flushed with TMSBr 3x or until the solution in the syringe was clear, and then TMSBr (26  $\mu$ L, 0.2 mmol, 2 equiv.) was added dropwise to the reaction being careful to ensure no TMSBr froze to the side of the vial. The reaction was allowed to continue stirring at  $-78\text{ }^{\circ}\text{C}$  for 1 hour, after which it was transferred to a  $-80\text{ }^{\circ}\text{C}$  freezer and continued without stirring for an additional 23 hours. The reaction was then quenched by the addition of a 1:1 solution of *i*-PrOH- $\text{Et}_3\text{N}$  (0.1 mL). After an additional 5 minutes at  $-80\text{ }^{\circ}\text{C}$ , the reaction was allowed to warm to room temperature and diluted with  $\text{Et}_2\text{O}$  (2 mL). A 1 mL aliquot of the reaction was run through a syringe filter and subjected to chiral GC analysis to determine enantiomeric excess, and where applicable, conversion relative to mesitylene.

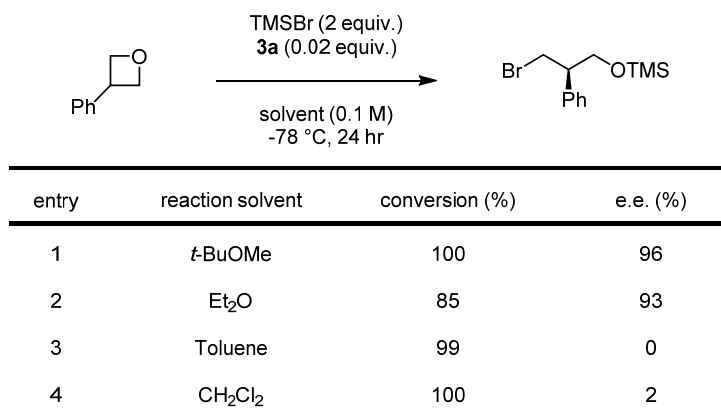

**Figure S1 – Optimization of reaction solvent.** All reactions were conducted according to General Procedure A, with the reaction solvent being modified.

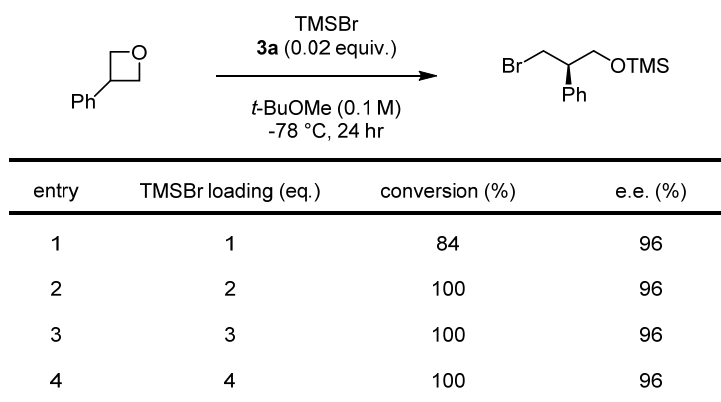

**Figure S2 – Optimization of TMSBr loading.** All reactions were conducted according to General Procedure A, with the loading of TMSBr being modified.



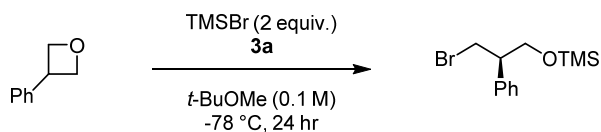

| entry | loading of <b>3a</b> (mol%) | run 1 - conversion (%) | run 1 - e.e. (%) | run 2 - e.e. (%) | run 3 - e.e. (%) |
|-------|-----------------------------|------------------------|------------------|------------------|------------------|
| 1     | 5                           | 100                    | 97               | —                | 97               |
| 2     | 1                           | 99                     | 96               | 96               | —                |
| 3     | 0.5                         | 86                     | 96               | 94               | 97               |
| 4     | 0.1                         | 42                     | 91               | 95               | —                |
| 5     | 0.05                        | 56                     | 73               | 91               | 87               |
| 6     | 0.01                        | 27                     | 43               | 86               | —                |

**Figure S3 – Optimization of catalyst loading.** All reactions were conducted according to General Procedure A, with the loading of catalyst **3a** being modified. We suspect that the irreproducibility at low catalyst loadings is due to variable contribution from an HBr-catalyzed background pathway which varies with the amount of adventitious water.

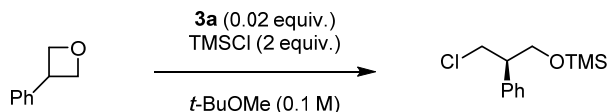

| entry | temperature | conversion (%) | e.e. (%) |
|-------|-------------|----------------|----------|
| 1     | -30 °C      | 14             | 97       |
| 2     | 4 °C        | 51             | 92       |

**Figure S4 – Highly enantioselective oxetane openings can be performed with TMSCl.** All reactions were conducted according to General Procedure A, with the following modifications: the reactions were run using TMSCl in place of TMSBr and at the indicated temperature. All reactions were run for 18 hours. In all cases, conversion of **1a** relative to mesitylene was determined by GC analysis. The enantiomeric enrichment was determined by GC using the standard procedure for brominated silyl ether **2a**. While TMSCl could effect highly enantioselective oxetane openings in the presence of **3a**, the reaction was far slower than that with TMSBr.

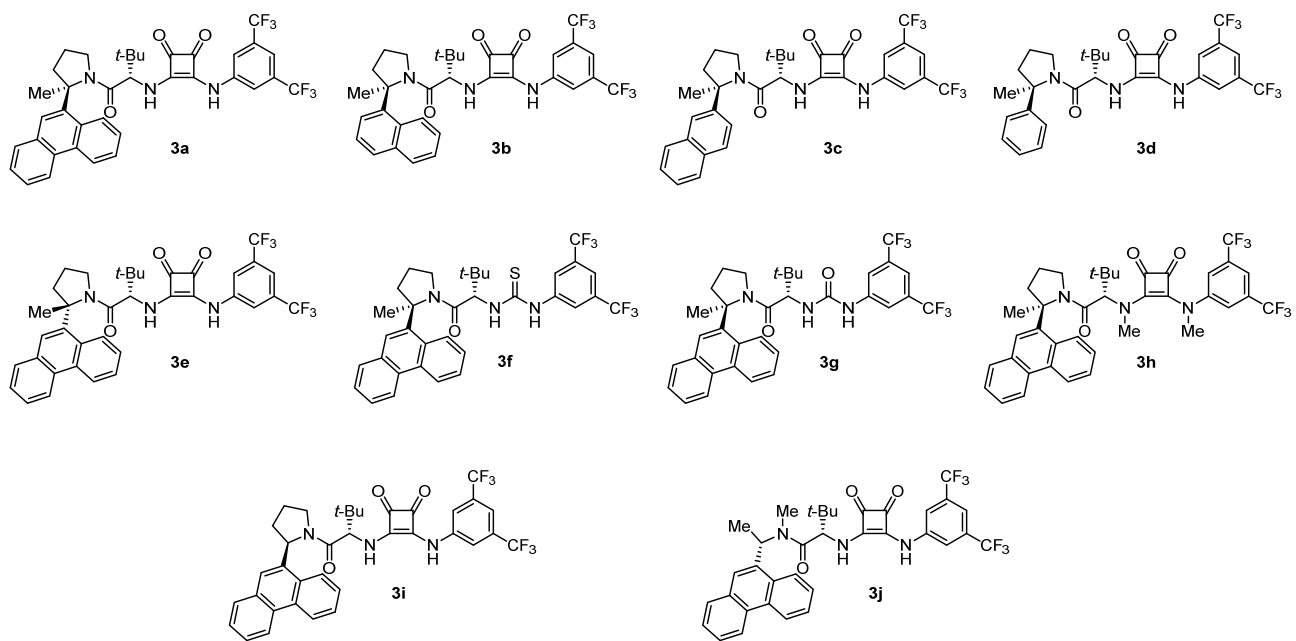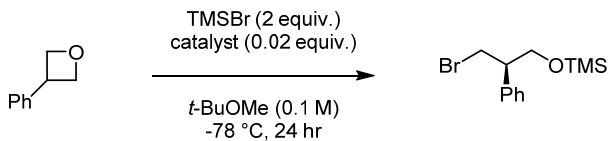

| entry | catalyst  | run 1 - e.e. (%) | run 2 - e.e. (%) | run 3 - e.e. (%) |
|-------|-----------|------------------|------------------|------------------|
| 1     | <b>3a</b> | 98               | 96               | 97               |
| 2     | <b>3b</b> | 90               | 88               | 94               |
| 3     | <b>3c</b> | 79               | 91               | 91               |
| 4     | <b>3d</b> | 51               | 70               | 83               |
| 5     | <b>3e</b> | -15              | —                | —                |
| 6     | <b>3f</b> | 80               | 86               | 87               |
| 7     | <b>3g</b> | 18               | 77               | 93               |
| 8     | <b>3h</b> | 12               | —                | —                |
| 9     | <b>3i</b> | 93               | 91               | —                |
| 10    | <b>3j</b> | 49               | —                | —                |

**Figure S5 – Catalyst optimization for enantioselectivity.** All reactions were conducted according to General Procedure A.

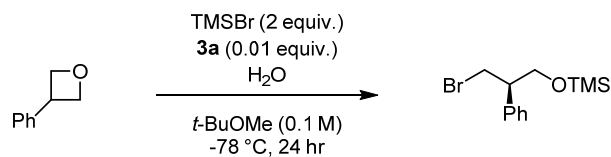

| entry | loading of H <sub>2</sub> O (mol%) | e.e. (%) |
|-------|------------------------------------|----------|
| 1     | 2                                  | 98       |
| 2     | 4                                  | 98       |
| 3     | 6                                  | 95       |
| 4     | 8                                  | 93       |

**Figure S6 – Effect of added H<sub>2</sub>O on enantioselectivity (375 mg scale reactions).** A round-bottom flask was equipped with a magnetic stir-bar and flame dried 2x under vacuum. The flask was then charged with catalyst **3a** (0.01 equiv.) and oxetane **1a** (1 equiv.), which were dissolved in *t*-BuOMe (0.1 M) under an atmosphere of nitrogen. The appropriate volume of water was then added to the reaction, being careful to ensure that the water was added directly to the solvent and did not adhere to the side of the flask. The solution was stirred at room temperature for 1 minute and then cooled to -78 °C in a dry ice-acetone bath, allowing 15 minutes for the temperature to equilibrate before TMSBr (0.74 mL, 5.59 mmol, 2 equiv.) was added to the reaction dropwise. The reaction was allowed to continue stirring at -78 °C for 24 hours, after which it was quenched by the addition of Et<sub>3</sub>N (2.5 mL / 1 mL of TMSBr). This was allowed to continue stirring at -78 °C for 2 minutes to ensure complete silylation of any residual bromohydrin, after which MeOH (2.5 mL / 1 mL of TMSBr) was added to complete the quench. The reaction was then passed through a short celite plug to remove the solids. The product (**2a**) was subjected to chiral GC analysis to determine enantiomeric excess.

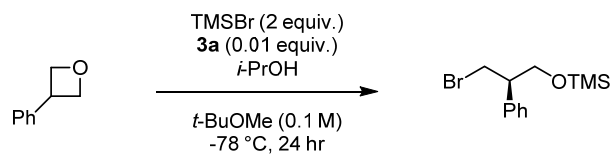

| entry | loading of <i>i</i> -PrOH (mol%) | e.e. (%) |
|-------|----------------------------------|----------|
| 1     | 1                                | 98       |
| 2     | 10                               | 94       |
| 3     | 50                               | 23       |

**Figure S7 – Effect of added *i*-PrOH on enantioselectivity.** All reactions were conducted according to General Procedure A with the following modification: the indicated loading of *i*-PrOH was added to the reaction.

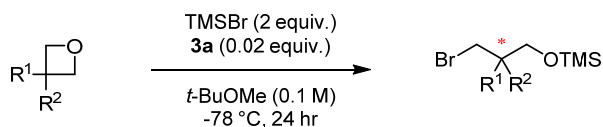

| entry | product   | screening scale run(s) - e.e. (%)                                              | 0.4 mmol scale run(s) - e.e. (%)          |
|-------|-----------|--------------------------------------------------------------------------------|-------------------------------------------|
| 1     | <b>2a</b> | 96, 97, 98                                                                     | 98, 98                                    |
| 2     | <b>2b</b> | 91 <sup>a</sup>                                                                | 92                                        |
| 3     | <b>2c</b> | 98 <sup>a</sup>                                                                | 98                                        |
| 4     | <b>2d</b> | -68 <sup>a,b</sup>                                                             | 73                                        |
| 5     | <b>2e</b> | -97 <sup>a,b</sup>                                                             | 98                                        |
| 6     | <b>2f</b> | 100                                                                            | 98 <sup>c</sup> , 99                      |
| 7     | <b>2g</b> | 95 <sup>a</sup>                                                                | 96                                        |
| 8     | <b>2h</b> | -91 <sup>a,b</sup>                                                             | 93                                        |
| 9     | <b>2i</b> | -98 <sup>a,b</sup>                                                             | 97                                        |
| 10    | <b>2j</b> | -96 <sup>a,b,d</sup>                                                           | 94, 96, 96                                |
| 11    | <b>2k</b> | -92 <sup>b,e,f</sup>                                                           | 89 <sup>f</sup> , 91 <sup>f</sup>         |
| 12    | <b>2l</b> | 87 <sup>d</sup>                                                                | 90                                        |
| 13    | <b>2m</b> | 95 <sup>d</sup>                                                                | 95, 96 <sup>c</sup>                       |
| 14    | <b>2n</b> | 98 <sup>a</sup>                                                                | 97, 99                                    |
| 15    | <b>2o</b> | —                                                                              | 93, 94                                    |
| 16    | <b>2p</b> | -81 <sup>b,e</sup>                                                             | 82, 85                                    |
| 17    | <b>2q</b> | 80 <sup>c,e,f</sup> , 81 <sup>e,f</sup> , -81 <sup>b,e,f</sup>                 | 82 <sup>f,g,h</sup>                       |
| 18    | <b>2r</b> | -91 <sup>b,e,f</sup> , -91 <sup>b,e,f</sup> , 92 <sup>e,f</sup>                | 92 <sup>f,g,h</sup>                       |
| 19    | <b>2s</b> | 89 <sup>c,e,f</sup>                                                            | 91 <sup>f,g,h</sup> , 91 <sup>f,g,h</sup> |
| 20    | <b>2t</b> | 82 <sup>c,e,f</sup>                                                            | 88 <sup>f,g,h</sup>                       |
| 21    | <b>2u</b> | 89 <sup>g,i</sup>                                                              | 88 <sup>g,i</sup>                         |
| 22    | <b>2v</b> | 58 <sup>g</sup> , -64 <sup>b,e</sup> , -77 <sup>b,e</sup> , -78 <sup>b,e</sup> | 67 <sup>c,g</sup> , 77 <sup>c,g</sup>     |

**Figure S8 – Reproducibility of e.e. for the enantioselective reaction.** Screening scale refers to 0.05 mmol of substrate unless otherwise noted. Deviations from standard conditions are as follows: a) 2.5 mol% **3a** was used; b) ent **3a** was used; c) 48 hour reaction time; d) reaction run on 0.1 mmol scale; e) 5 mol% **3a** was used; f) reaction run at -25 °C; g) 7.5 mol% **3a** was used; h) 72 hour reaction time; i) reaction run at -65 °C. Greater variability in e.e. is expected for products **2k** and **2q-v** due to imperfect control over temperature for reactions run in cryocools.

## Kinetic Isotope Effect Experiments

### General procedure for KIE experiments:

A stock solution was prepared consisting of ~1 : 1  $^{12}\text{C}_2$ - and  $^{13}\text{C}_2$ - oxetane **1a** (0.3 mmol  $^{12}\text{C}_2$ -**1a** and 0.3 mmol  $^{13}\text{C}_2$ -**2a**) and mesitylene (60  $\mu\text{L}$ ) in *t*-BuOMe (6 mL, 0.1 M total oxetane). 4 mL (0.4 mmol total **1a**, 1 equiv.) of this stock solution was added to an oven-dried 2-dram vial which had been charged with catalyst **3a** (5.4 mg, 0.008 mmol, 0.02 equiv.) and a magnetic stir-bar, and closed with a screw-cap containing a rubber septum. The remainder of the stock solution was set aside to use as the  $R_0$  sample. The headspace of the vial was flushed with nitrogen for 15 seconds and then the vial was cooled to  $-78\text{ }^\circ\text{C}$  in a dry ice-acetone bath, allowing 15 minutes for the temperature to equilibrate. A micro-syringe was flushed with TMSBr 3x or until the solution in the syringe was clear, and then TMSBr (42  $\mu\text{L}$ , 0.32 mmol, 0.8 equiv.) was added dropwise to the reaction being careful to ensure no TMSBr froze to the side of the vial. The reaction was allowed to continue stirring at  $-78\text{ }^\circ\text{C}$  for 3 days, after which it was quenched by the addition of a 1:1 solution of *i*-PrOH-Et<sub>3</sub>N (0.4 mL). After an additional 5 minutes at  $-78\text{ }^\circ\text{C}$ , the reaction was allowed to warm to room temperature and an aliquot was removed for GC analysis to determine conversion and enantiomeric enrichment of the product. The remainder of the crude reaction mixture was diluted with Et<sub>2</sub>O and saturated aqueous NaHCO<sub>3</sub>. The organic layer was removed, and the aqueous layer was extracted 3x with Et<sub>2</sub>O. The combined organic layers were washed with brine, dried briefly (~10 minutes) over MgSO<sub>4</sub>, filtered, concentrated under vacuum, and purified by flash column chromatography to recover the unreacted oxetane **1a** starting material for NMR analysis of the  $R_f$  sample. An aliquot of the  $R_0$  sample was removed for GC measurement and the remainder of the sample was purified by flash column chromatography to recover pure oxetane **1a** for NMR analysis of the  $R_0$  sample.

### Sample measurement for KIE experiments:

GC measurements of aliquots of the crude  $R_0$  and  $R_f$  samples were conducted using either the standard chiral GC conditions for product **2a** or using an achiral GC (HP-5 – 30m x 0.32 mm x 0.25  $\mu\text{m}$ , 40  $^\circ\text{C}$  for 2 minutes, 40 $\rightarrow$ 225  $^\circ\text{C}$  at 25 $^\circ$ /min, 7 psi). Conversion was determined relative to the mesitylene internal standard. Six GC runs were recorded for each sample. The e.e. of the product in the  $R_f$  sample was then measured using the standard chiral GC conditions for product **2a**.

The ratio of  $^{12}\text{C}$  to  $^{13}\text{C}$  in the 2- and 4-positions of the 3-phenyloxetane was determined through  $^1\text{H}$ -NMR analysis of the protons bound to those carbons and their  $^{13}\text{C}$  satellite peaks.<sup>1</sup> NMR measurements of the purified  $R_0$  and  $R_f$  samples were conducted in 600  $\mu\text{L}$  of CDCl<sub>3</sub> each at nearly-identical concentration (as determined by integration of the benzylic proton relative to the solvent residual peak). The spectra were recorded on a Varian NMR probe (600 MHz) at room temperature. In order to obtain reproducible and quantitative results spectra were recorded without sample spinning using a calibrated ninety-degree pulse with the transmitter offset frequency set to -90.8 Hz. An acquisition time of 2.5 seconds and relaxation delay of 30 seconds were used. Six spectra were recorded for each sample.

### Data analysis for KIE experiments:

All GC spectra were normalized such that the area under the mesitylene peak was set to 1000 units.

All spectra were processed using Mestrenova. Spectra were aligned by setting the solvent residual peak to 7.26 ppm, and then phased using Mestrenova's automatic phase correction followed by a manual phase correction. Then a third-order polynomial baseline correction was applied. All NMR spectra were normalized such that the integral of the benzylic proton ( $\text{H}^c$  in Fig. S10) was set to 2000 units.

The kinetic isotope effect was computed using the following formula:

$$\frac{k_{12}}{k_{13}} = \frac{\ln(1 - F_{12})}{\ln\left((1 - F_{12}) * \frac{R_f}{R_0}\right)}$$

where:

$$R_0 = \frac{[^{13}\text{C Oxetane}]}{[^{12}\text{C Oxetane}]} \text{ in the stock solution of starting material added to the reaction}$$

$$R_f = \frac{[^{13}\text{C Oxetane}]}{[^{12}\text{C Oxetane}]} \text{ in the starting material recovered from a reaction run to partial conversion}$$

and  $F_{12}$  is the fractional conversion of  $^{12}\text{C}$  oxetane given by:

$$1 - F_{12} = (1 - F) * \frac{1 + R_0}{1 + R_f} \text{ where } F \text{ is the fractional conversion in total oxetane}$$

Error was determined using the following formula:<sup>2</sup>

$$\Delta KIE = KIE * \sqrt{\left(\frac{\Delta KIE_F}{KIE}\right)^2 + \left(\frac{\Delta KIE_R}{KIE}\right)^2}$$

where:

$$\Delta KIE_F = \frac{-\ln(R_f/R_0)}{(1 - F_{12}) * \ln^2((1 - F_{12}) * R_f/R_0)} * \Delta F_{12}$$

$$\Delta KIE_R = \frac{-\ln(1 - F_{12})}{(R_f/R_0) * \ln^2((1 - F_{12}) * R_f/R_0)} * \Delta(R_f/R_0)$$

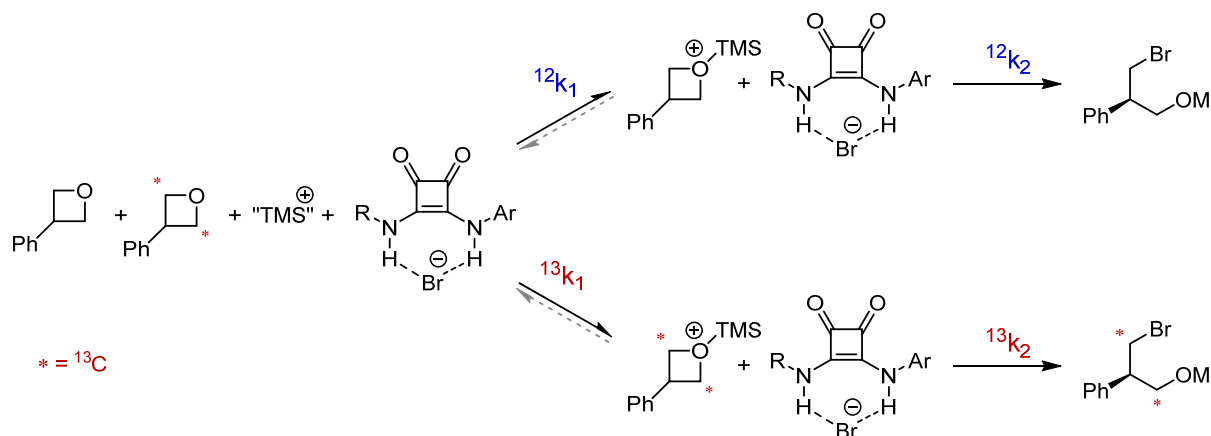

**Figure S9 – Identification of the enantiodetermining step via a one-pot competition kinetic isotope effect experiment.** Based on chemical intuition, we expected that C-Br bond formation ( $k_2$ ) would be the enantiodetermining step of the transformation. However, we have previously encountered unexpected enantiodetermining steps in methods developed by our lab, with the asymmetric Strecker reaction providing a particularly relevant example.<sup>3</sup> In that transformation, which occurs by imine activation via protonation followed by C-C bond formation through cyanide delivery, the activation/rearrangement step was found to be enantiodetermining instead of the anion delivery step. Thus, we felt it was necessary to consider the possibility that oxetane activation ( $k_1$ ) could be irreversible, and thus, potentially enantiodetermining. To probe this, a one-pot competition kinetic isotope effect experiment was conducted using an ~ 1 : 1 ratio of 2,4- $^{12}\text{C}$  and 2,4- $^{13}\text{C}$  oxetane **1a**. If oxetane activation is irreversible then the KIE will reflect  $^{12}k_1/^{13}k_1$ . Since that step occurs on oxygen, the isotope effect at carbon will be secondary, and therefore, should be small (i.e. <1.02). However, if the activation of any particular molecule of oxetane is reversible, then the KIE will primarily reflect the relative rates of bromide delivery ( $k_2$ ) to the two isotopologues (more precisely, it will reflect both  $k_2$  and the equilibrium isotope effect for the activation of  $^{12}\text{C}$  vs  $^{13}\text{C}$  oxetanes, but the latter effect is expected to be small). Because bromide substitution occurs directly at the labeled/unlabeled carbon,  $^{12}k_2/^{13}k_2$  will reflect a primary carbon KIE, which is expected to be significantly larger (typically 1.03-1.08) than that for irreversible oxetane activation. The observation of a large, primary KIE unambiguously indicates that oxetane activation must be reversible, and thus, cannot be enantiodetermining. Consequently, we have assigned anion delivery as the enantiodetermining step.

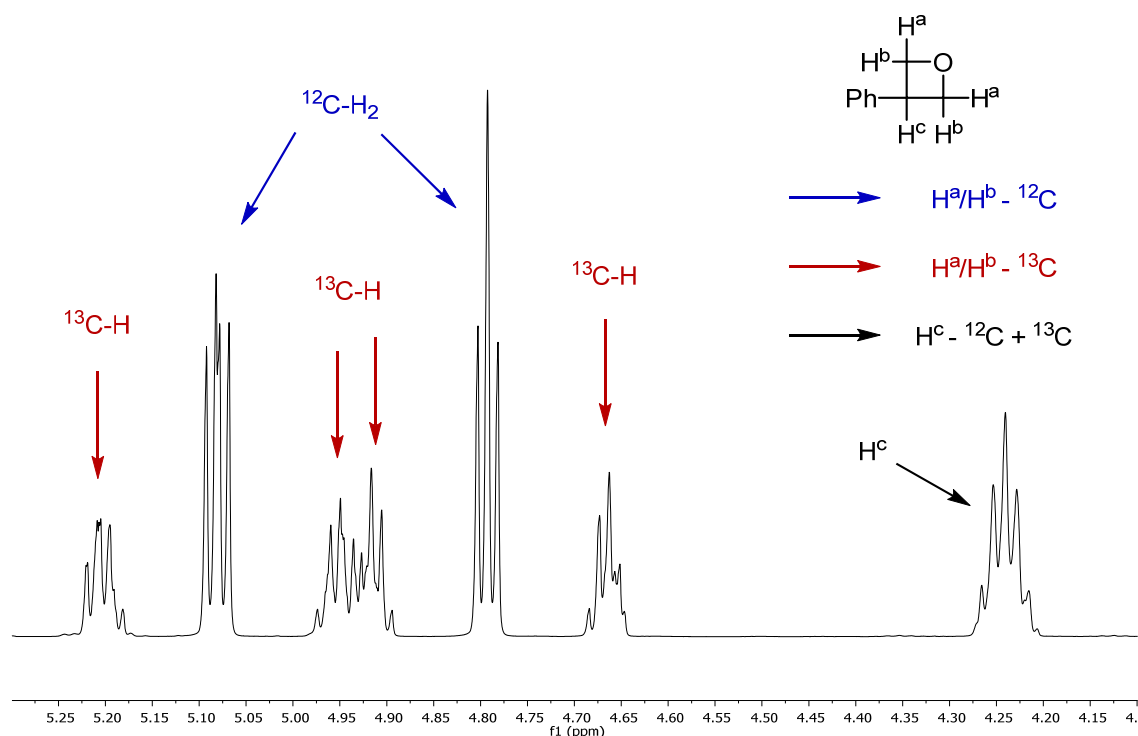

**Figure S10 – Representative  $^1\text{H}$  NMR spectrum showing the peaks of interest.** The protons corresponding to  $\text{H}^a$  and  $\text{H}^b$  for  $^{12}\text{C}$  oxetane are located in the ranges 5.11-5.05 ppm and 4.85-4.76 ppm, each of which integrates for 2 protons/molecule of  $^{12}\text{C}_2$  oxetane. For  $^{13}\text{C}_2$  oxetane these peaks are split by coupling to the  $^{13}\text{C}$ , giving resonances in the ranges 5.23-5.18 ppm, 4.98-4.88 ppm (2 overlapping resonances), and 4.71-4.63 ppm which integrate for 1, 2, and 1 protons/molecule of  $^{13}\text{C}_2$  oxetane respectively. The benzylic proton ( $\text{H}^c$ ) is located at 4.29-4.17 ppm and is common to both  $^{12}\text{C}_2$  and  $^{13}\text{C}_2$  oxetane. This peak was used to normalize integrations across multiple measurements (the integral  $\text{H}^c$  was set to 2000 units in each spectrum).

| Run 1: $\text{R}_0$ Sample    |                      |                                    |                  |                                    |                  |                  |
|-------------------------------|----------------------|------------------------------------|------------------|------------------------------------|------------------|------------------|
| Measurement                   | Normalized [Oxetane] | Normalized $^{12}\text{C}$ -H int. |                  | Normalized $^{13}\text{C}$ -H int. |                  |                  |
|                               |                      | 5.107-5.051 (2H)                   | 4.853-4.758 (2H) | 5.230-5.177 (1H)                   | 4.983-4.884 (2H) | 4.709-4.632 (1H) |
| 1                             | 1211.10              | 2074.60                            | 2082.68          | 993.31                             | 1979.08          | 982.90           |
| 2                             | 1213.45              | 2071.37                            | 2081.78          | 990.36                             | 1976.44          | 983.96           |
| 3                             | 1214.60              | 2071.51                            | 2082.53          | 990.69                             | 1976.98          | 983.74           |
| 4                             | 1216.06              | 2068.53                            | 2082.34          | 988.25                             | 1975.17          | 984.26           |
| 5                             | 1221.83              | 2067.38                            | 2083.43          | 987.05                             | 1974.53          | 984.26           |
| 6                             | 1215.28              | 2066.09                            | 2084.23          | 985.82                             | 1974.07          | 983.56           |
| Property                      |                      | Value                              |                  | Standard deviation                 |                  |                  |
| Normalized [Oxetane]          |                      | 1215.39                            |                  | 3.60                               |                  |                  |
| Normalized $^{12}\text{C}$ -H |                      | 1038.19                            |                  | 3.55                               |                  |                  |
| Normalized $^{13}\text{C}$ -H |                      | 987.02                             |                  | 2.89                               |                  |                  |

**Figure S11 – Tabulated data for  $\text{R}_0$  sample for run 1.** The  $\text{R}_0$  sample for run 1 was prepared according to the general procedure for KIE experiments. The concentration of oxetane to mesitylene was measured using the achiral GC method described above. For details on how the reaction was conducted see Fig. S12.



| Run 1: R <sub>f</sub> Sample |                      |                                   |                  |                                   |                  |                  |
|------------------------------|----------------------|-----------------------------------|------------------|-----------------------------------|------------------|------------------|
| Measurement                  | Normalized [Oxetane] | Normalized <sup>12</sup> C-H int. |                  | Normalized <sup>13</sup> C-H int. |                  |                  |
|                              |                      | 5.107-5.051 (2H)                  | 4.853-4.758 (2H) | 5.230-5.177 (1H)                  | 4.983-4.884 (2H) | 4.709-4.632 (1H) |
| 1                            | 743.60               | 2011.18                           | 2023.44          | 1019.40                           | 2034.69          | 1010.36          |
| 2                            | 746.63               | 2009.36                           | 2023.42          | 1018.01                           | 2033.50          | 1010.66          |
| 3                            | 751.93               | 2008.13                           | 2023.61          | 1017.45                           | 2033.10          | 1010.32          |
| 4                            | 752.85               | 2007.01                           | 2025.65          | 1016.89                           | 2033.61          | 1010.50          |
| 5                            | 752.31               | 2004.56                           | 2025.06          | 1015.27                           | 2032.30          | 1009.74          |
| 6                            | 758.07               | 2002.60                           | 2027.45          | 1013.32                           | 2032.22          | 1009.59          |
| Property                     |                      | Value                             |                  | Standard deviation                |                  |                  |
| Normalized [Oxetane]         |                      | 750.90                            |                  | 5.09                              |                  |                  |
| Normalized <sup>12</sup> C-H |                      | 1007.98                           |                  | 4.76                              |                  |                  |
| Normalized <sup>13</sup> C-H |                      | 1014.51                           |                  | 3.37                              |                  |                  |

**Figure S12 – Tabulated data for R<sub>f</sub> sample for run 1.** Run 1 was conducted using the stock solution described in Fig. S11 and was run according to the general procedure for KIE experiments with the following modification: a higher concentration of TMSBr (106  $\mu$ L, 2 equiv.) was added and the reaction was quenched after 8 hours. The concentration of oxetane relative to mesitylene was determined using the achiral GC method described above. Chiral GC analysis of the crude reaction mixture revealed that **2a** was formed in 96% enantiomeric enrichment.

| Run 2: R <sub>0</sub> Sample |                      |                                   |                  |                                   |                  |                  |
|------------------------------|----------------------|-----------------------------------|------------------|-----------------------------------|------------------|------------------|
| Measurement                  | Normalized [Oxetane] | Normalized <sup>12</sup> C-H int. |                  | Normalized <sup>13</sup> C-H int. |                  |                  |
|                              |                      | 5.107-5.051 (2H)                  | 4.853-4.758 (2H) | 5.230-5.177 (1H)                  | 4.983-4.884 (2H) | 4.709-4.632 (1H) |
| 1                            | 1088.54              | 2236.13                           | 2242.33          | 896.10                            | 1795.76          | 900.64           |
| 2                            | 1089.45              | 2235.20                           | 2240.47          | 895.29                            | 1794.93          | 900.39           |
| 3                            | 1082.25              | 2235.59                           | 2241.19          | 895.70                            | 1795.30          | 900.48           |
| 4                            | 1073.58              | 2235.58                           | 2241.57          | 896.25                            | 1795.63          | 899.82           |
| 5                            | 1082.17              | 2235.90                           | 2241.38          | 896.62                            | 1795.72          | 899.71           |
| 6                            | 1088.04              | 2232.13                           | 2237.50          | 892.95                            | 1792.15          | 900.56           |
| Property                     |                      | Value                             |                  | Standard deviation                |                  |                  |
| Normalized [Oxetane]         |                      | 1084.00                           |                  | 6.02                              |                  |                  |
| Normalized <sup>12</sup> C-H |                      | 1118.96                           |                  | 1.66                              |                  |                  |
| Normalized <sup>13</sup> C-H |                      | 897.74                            |                  | 2.19                              |                  |                  |

**Figure S13 – Tabulated data for R<sub>0</sub> sample for run 2.** The R<sub>0</sub> sample for run 2 was prepared according to the general procedure for KIE experiments with the following modifications: the stock solution of oxetane consisted of 0.4 mmol each of <sup>12</sup>C<sub>2</sub>-**1a** and <sup>13</sup>C<sub>2</sub>-**1a**, with 80  $\mu$ L of mesitylene in *t*-BuOMe (8 mL, 0.1 M total oxetane). The standard chiral GC method was used to determine the total concentration of oxetane relative to mesitylene. For details on how the reaction was conducted see Fig. S14.

| Run 2: R <sub>f</sub> Sample |                      |                                   |                  |                                   |                  |                  |
|------------------------------|----------------------|-----------------------------------|------------------|-----------------------------------|------------------|------------------|
| Measurement                  | Normalized [Oxetane] | Normalized <sup>12</sup> C-H int. |                  | Normalized <sup>13</sup> C-H int. |                  |                  |
|                              |                      | 5.107-5.051 (2H)                  | 4.853-4.758 (2H) | 5.230-5.177 (1H)                  | 4.983-4.884 (2H) | 4.709-4.632 (1H) |
| 1                            | 153.68               | 1942.15                           | 1948.22          | 970.06                            | 1960.41          | 989.41           |
| 2                            | 159.16               | 1944.68                           | 1948.49          | 970.76                            | 1960.33          | 988.69           |
| 3                            | 156.10               | 1944.09                           | 1948.67          | 971.04                            | 1959.96          | 988.76           |
| 4                            | 156.01               | 1943.44                           | 1946.38          | 969.62                            | 1958.77          | 988.47           |
| 5                            | 156.26               | 1942.41                           | 1946.81          | 971.09                            | 1959.14          | 988.14           |
| 6                            | 155.28               | 1942.53                           | 1947.24          | 969.06                            | 1958.37          | 988.92           |
| <b>Property</b>              |                      | <b>Value</b>                      |                  | <b>Standard deviation</b>         |                  |                  |
| Normalized [Oxetane]         |                      | 156.08                            |                  | 1.78                              |                  |                  |
| Normalized <sup>12</sup> C-H |                      | 972.71                            |                  | 1.25                              |                  |                  |
| Normalized <sup>13</sup> C-H |                      | 979.58                            |                  | 7.77                              |                  |                  |

**Figure S14 – Tabulated data for R<sub>f</sub> sample for run 2.** Run 2 was conducted according to the general procedure for KIE experiments with the following modifications: 3 mL of the stock solution described in Fig. S13 (0.3 mmol total **1a**, 1 equiv.) and 5 mol% of **3a** were used (the TMSBr loading remained 0.8 equiv. relative to 0.3 mmol total **1a**). The standard chiral GC method was used to determine the concentration of oxetane relative to mesitylene after the reaction was quenched, and also to determine that **2a** was formed in 97% enantiomeric enrichment.

| KIE measurements               |              |              |              |              |
|--------------------------------|--------------|--------------|--------------|--------------|
| Property                       | Run 1        |              | Run 2        |              |
|                                | Value        | Error        | Value        | Error        |
| R <sub>f</sub> /R <sub>0</sub> | 1.0587       | 0.0077       | 1.255        | 0.011        |
| 1–F <sub>12</sub>              | 0.6007       | 0.0063       | 0.1293       | 0.0020       |
| <b>KIE</b>                     | <b>1.126</b> | <b>0.018</b> | <b>1.125</b> | <b>0.005</b> |

**Figure S15 – Tabulated data for KIEs.** All values were calculated using the equations described above. Data for run 1 are drawn from Fig. S11 and S12. Data for run 2 are drawn from Fig. S13 and S14. The average KIE over the two samples is 1.126(9). The measured KIEs are very large even for a primary <sup>12</sup>C/<sup>13</sup>C KIE, potentially indicating tunneling by the carbon atom during the bromide delivery step.

## Synthesis and Characterization of Catalysts

Catalysts **3a-3d** were prepared according to the general procedure described below. Allylation procedure B, based on a previously reported method,<sup>4</sup> was used for the synthesis of catalysts **3c** and **3d** as it provided excellent d.r. and good yield. For the optimal catalyst **3a** and 1-naphthyl pyrrolidine **3b** it was necessary to use allylation procedure A, as procedure B provided poor d.r. and low yield with those substrates. 3-((3,5-bis(trifluoromethyl)phenyl)amino)-4-methoxycyclobut-3-ene-1,2-dione **11** was prepared according to a literature procedure.<sup>5</sup> A representative procedure is described for the synthesis of optimal catalyst **3a** and for allylation procedure B en route to catalyst **3c**. This route and the characterization data for catalysts **3a-3d** collected for this publication were previously reported by our lab.<sup>6</sup>

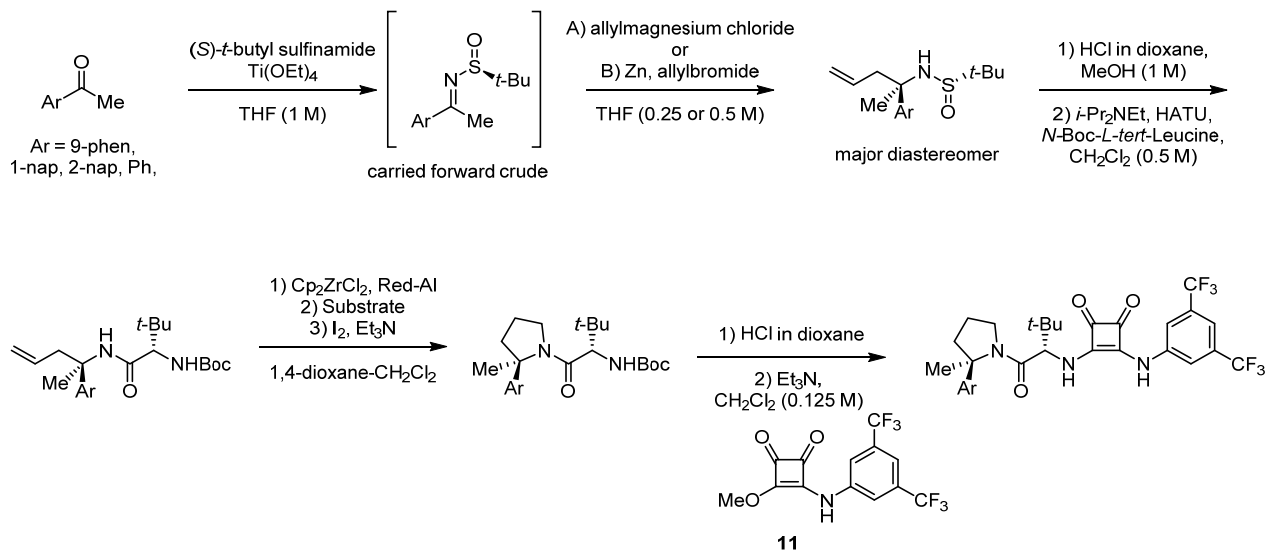

### Allylation procedure A (used for catalysts **3a** and **3b**):

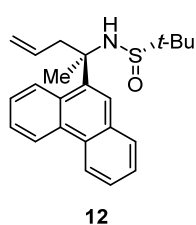

**(S)-2-methyl-N-((R)-2-(phenanthren-9-yl)pent-4-en-2-yl)propane-2-sulfonamide (12):** To 9-phenanthryl methylketone (7.82 g, 35.5 mmol, 1 equiv.) was added (*S*)-*t*-butyl sulfonamide (4.73 g, 39.1 mmol, 1.1 equiv.) and THF (35 mL, 1 M). Then Ti(OEt)<sub>4</sub> (16.4 mL, 78 mmol, 2.2 equiv.) was added and the solution was heated to reflux. After 48 hours, the solution was cooled to room temperature and was then diluted with EtOAc and quenched by the addition of saturated aqueous Na<sub>2</sub>SO<sub>4</sub> (8.2 mL). The resulting slurry was stirred for 10 minutes. MgSO<sub>4</sub> was added and the slurry was stirred for an additional 10 minutes, after which it was filtered through a plug of celite in a Buchner funnel. The filter cake was rinsed 2x with EtOAc and the filtrate was

dried over Na<sub>2</sub>SO<sub>4</sub>, filtered, concentrated under reduced pressure, and carried forward crude assuming quantitative yield. In a separate flask, a solution of allylmagnesium chloride (14.7 mL of a 2.0 M solution in THF, 2.45 equiv.) was added to THF (50 mL, 0.25 M). The crude ketimine was then added over 5 minutes as a solution in THF (35.5 mmol in 20 mL of THF, 1 equiv.). The reaction was stirred at room temperature for 2 hours after which it was quenched by the addition of water and diluted with Et<sub>2</sub>O. The organic layer was removed, and the aqueous layer was extracted 2x with Et<sub>2</sub>O. The combined organic layers were dried over MgSO<sub>4</sub>, filtered, concentrated under reduced pressure, and purified by flash column chromatography to yield **12** (7.47 g, 20.43 mmol, 58% yield over two steps).

<sup>1</sup>H NMR (500 MHz, CDCl<sub>3</sub>) δ 8.85 (dd, *J* = 8.4, 1.4 Hz, 1H), 8.76 (dd, *J* = 8.3, 1.5 Hz, 1H), 8.64 (d, *J* = 8.2 Hz, 1H), 7.93 (s, 1H), 7.90 (dd, *J* = 7.9, 1.5 Hz, 1H), 7.68 – 7.53 (m, 4H), 5.60 (ddt, *J* = 17.2, 10.0, 7.4 Hz, 1H), 5.15 (dq, *J* = 17.1, 1.5 Hz, 1H), 5.08 (dd, *J* = 10.2, 2.1 Hz, 1H), 3.90 (s, 1H), 3.09 (d, *J* = 7.4 Hz, 2H), 2.14 (s, 3H), 1.16 (s, 9H) ppm; <sup>13</sup>C NMR (126 MHz, CDCl<sub>3</sub>) δ 135.7, 133.1, 131.7, 130.9, 130.4, 129.7, 129.3, 128.6, 128.2, 127.2, 126.8, 125.9, 125.4, 123.4, 122.2, 119.8, 62.0, 56.1, 47.0, 30.5, 23.0 ppm; FT-IR (thin-film): 3220, 3075, 2977, 2961, 2867, 1494, 1472, 1450, 1386, 1365, 1145, 1054, 994, 909, 895, 854, 835, 794, 767, 748, 730, 617 cm<sup>-1</sup>; HRMS (FTMS + p ESI) calculated for C<sub>23</sub>H<sub>28</sub>NOS [M+H]<sup>+</sup> 366.1886, found 366.1884; [α]<sub>D</sub> = 75.6° (c = 1.0, CHCl<sub>3</sub>).

### Allylation procedure B (used for catalysts 3c-3g):

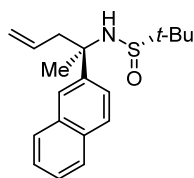

13

#### (S)-2-methyl-N-((R)-2-(naphthalen-2-yl)pent-4-en-2-yl)propane-2-sulfonamide (13):

Homoallyl sulfonamide **13** was prepared using a procedure based on a previous literature report.<sup>4</sup> To 2-acetonaphthone (1.70 g, 10 mmol, 1 equiv.) was added (*S*)-*t*-butyl sulfonamide (1.33 g, 11 mmol, 1.1 equiv.) and THF (10 mL, 1 M). Then Ti(OEt)<sub>4</sub> (4.6 mL, 22 mmol, 2.2 equiv.) was added and the solution was heated to reflux. After 24 hours, the solution was cooled to room temperature, diluted with EtOAc and quenched by the addition of saturated aqueous Na<sub>2</sub>SO<sub>4</sub>. The resulting slurry was stirred for 15 minutes after which MgSO<sub>4</sub> was added and the solution was stirred for an additional 5 minutes. The slurry was then filtered through a plug of celite in a Buchner funnel. The filter cake was rinsed 2x with EtOAc and the filtrate was dried over Na<sub>2</sub>SO<sub>4</sub>, filtered, and concentrated under reduced pressure. Then zinc powder (719 mg, 11 mmol, 1.1 equiv.) was added to the crude ketimine and the solids were placed under an atmosphere of nitrogen. The solids were suspended in THF (20 mL, 0.5 M) and TMSCl (60 uL, 0.5 mmol, 0.05 equiv.) was added to activate the zinc metal. The suspension was stirred for 15 minutes, at which point the flask was placed in a room-temperature water bath and then allylbromide (0.95 mL, 11 mmol, 1.1 equiv.) was added over 1 minute and the reaction was allowed to continue overnight. The following day the reaction was diluted with EtOAc and quenched by the addition of saturated aqueous NaHCO<sub>3</sub>. The resulting biphasic solution was stirred until the two layers cleanly separated and a white precipitate was visible (about 3 hours) and then the organic layer was removed. The aqueous layer was extracted 2x with EtOAc and then the combined organic layers were washed with brine, dried over Na<sub>2</sub>SO<sub>4</sub>, filtered, and concentrated under reduced pressure. NMR analysis of the crude reaction mixture revealed a 95 : 5 diastereomer ratio, which was purified by flash column chromatography to yield major diastereomer **13** (2.06 g, 6.53 mmol, 65% yield over the two steps). The spectral data were consistent with a previous literature report of the enantiomeric compound.<sup>4</sup> <sup>1</sup>H NMR (600 MHz, CDCl<sub>3</sub>) δ 7.86 (d, *J* = 2.0 Hz, 1H), 7.85 – 7.80 (m, 3H), 7.57 (dd, *J* = 8.7, 2.0 Hz, 1H), 7.52 – 7.45 (m, 2H), 5.59 (ddt, *J* = 17.4, 10.1, 7.4 Hz, 1H), 5.20 (ddt, *J* = 17.0, 2.3, 1.3 Hz, 1H), 5.13 (dd, *J* = 10.1, 2.1 Hz, 1H), 3.81 (s, 1H), 2.76 (d, *J* = 7.4 Hz, 2H), 1.89 (s, 3H), 1.24 (s, 9H) ppm; [α]<sub>D</sub> = 70.8° (c = 1.0, CHCl<sub>3</sub>).

### Representative procedure for the synthesis of catalyst 3a:

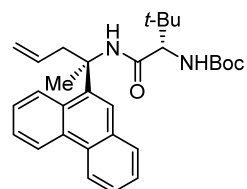

14

#### tert-butyl ((S)-3,3-dimethyl-1-oxo-1-(((R)-2-(phenanthren-9-yl)pent-4-en-2-yl)amino)butan-2-yl)carbamate (14):

Sulfonamide **12** (7.47 g, 20.43 mmol, 1 equiv.) was dissolved in MeOH (20.4 mL, 1 M) and cooled to 0 °C. Then HCl (10.2 mL of a 4 M solution in dioxane, 2 equiv.) was added, after which the reaction was allowed to warm to room temperature. After 60 minutes, TLC indicated complete consumption of the starting material, so the reaction was sparged with nitrogen for 30 minutes to remove the HCl and then concentrated under vacuum. The solids were dissolved in water and Et<sub>2</sub>O, the organic layer was removed, and the aqueous layer was washed 3x with Et<sub>2</sub>O. Then 2 M aqueous NaOH was added to the aqueous layer until it reached a pH of 14, and the basic aqueous layer was extracted 5x with CH<sub>2</sub>Cl<sub>2</sub>. The combined CH<sub>2</sub>Cl<sub>2</sub> extractions were dried over Na<sub>2</sub>SO<sub>4</sub>, filtered, concentrated under reduced pressure, and carried forward crude assuming quantitative yield. The crude amine was dissolved in CH<sub>2</sub>Cl<sub>2</sub> (41 mL, 0.5 M) and the solution was cooled to 0 °C. To this was added sequentially *i*-Pr<sub>2</sub>NEt (5.2 mL, 30.6 mmol, 1.5 equiv.), *N*-Boc-*L*-*tert*-Leucine (5.20 g, 22.47 mmol, 1.1 equiv.), and HATU (8.55 g, 22.47 mmol, 1.1 equiv.). After 15 minutes the ice bath was removed, and the reaction was allowed to continue at room temperature. After 36 hours the reaction was diluted with Et<sub>2</sub>O and quenched by the addition of water. The aqueous layer was removed, and the organic layer was washed 2x with 1 M aqueous HCl and then 2x with sat. aq. NaHCO<sub>3</sub>. The organic layer was then washed with brine, dried over MgSO<sub>4</sub>, filtered, concentrated under reduced pressure, and purified by flash column chromatography to yield **14** (9.35 g, 19.70 mmol, 96% yield). <sup>1</sup>H NMR (600 MHz, CDCl<sub>3</sub>) δ 8.77 (dd, *J* = 8.4, 1.4 Hz, 1H), 8.63 (d, *J* = 8.3 Hz, 1H), 8.53 (dd, *J* = 8.5, 1.3 Hz, 1H), 7.86 (dd, *J* = 7.8, 1.4 Hz, 1H), 7.82 (s, 1H), 7.64 – 7.51 (m, 4H), 6.29 (s, 1H), 5.67 (dtd, *J* = 15.9, 9.3, 5.8 Hz, 1H), 5.21 (d, *J* = 17.0 Hz, 1H), 5.15 (d, *J* = 10.1 Hz, 1H), 5.00 (d, *J* = 9.7 Hz, 1H), 3.82 (d, *J* = 9.6 Hz, 1H), 3.25 (dd, *J* = 13.9, 8.8 Hz, 1H), 2.95 (dd, *J* = 14.0, 5.9 Hz, 1H), 2.06 (s, 3H), 1.39 (s, 9H), 0.98 (s, 9H) ppm; <sup>13</sup>C NMR (126 MHz, CDCl<sub>3</sub>) δ 169.9, 156.0, 137.5, 133.3, 131.8, 131.3, 130.3, 129.5, 129.3, 126.9, 126.8, 126.1, 126.03, 125.98, 125.87, 124.0, 122.4, 120.1, 79.7, 62.8, 59.1, 45.1, 34.7, 28.5, 26.7, 26.0 ppm; FT-IR (thin-film): 3404, 3329, 3074, 2974, 2871, 1701, 1675, 1495, 1455, 1391, 1366, 1317, 1248, 1169, 1059, 1006, 912, 865, 766, 746, 728 cm<sup>-1</sup>; HRMS (FTMS + p ESI) calculated for C<sub>30</sub>H<sub>39</sub>N<sub>2</sub>O<sub>3</sub> [M+H]<sup>+</sup> 475.2955, found 475.2953; [α]<sub>D</sub> = -70.0° (c = 1.0, CHCl<sub>3</sub>).

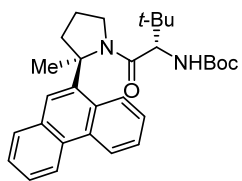

15

**tert-butyl ((S)-3,3-dimethyl-1-((R)-2-methyl-2-(phenanthren-9-yl)pyrrolidin-1-yl)-1-oxobutan-2-yl)carbamate (15):** A suspension of Schwartz's reagent was generated using a procedure based on a previous literature report.<sup>7</sup> Zirconocene dichloride (17.9 g, 61.2 mmol, 4.2 equiv.) was suspended in 1,4-dioxane (300 mL) under an atmosphere of nitrogen. A solution of Red-Al (10.3 mL of a >60 wt% solution in toluene, 30.6 mmol, 2.1 equiv.) was added dropwise, and the resulting suspension was allowed to continue stirring at room temperature. After 2 hours, the suspension was cooled to 0 °C and then homoallyl amide **14** was added dropwise as a solution in CH<sub>2</sub>Cl<sub>2</sub> (6.93 g in 10 mL OF CH<sub>2</sub>Cl<sub>2</sub>, 14.6 mmol, 1 equiv.) The ice-bath was removed upon completion of the addition, and the reaction was

allowed to continue at room temperature overnight. The following morning, the reaction was cooled to 0 °C and I<sub>2</sub> (15.2 g, 59.9 mmol, 4.1 equiv.) and Et<sub>3</sub>N (10.2 mL, 73.2 mmol, 5 equiv.) were added simultaneously. The ice-bath was removed upon completion of the addition, and the reaction was allowed to continue at room temperature for 3 hours. The reaction was then transferred to a large flask using additional CH<sub>2</sub>Cl<sub>2</sub> to ensure transfer of all solids and concentrated under vacuum onto a sufficient quantity of silica gel to form a fine tan powder. The impregnated silica was added to the top of a silica plug and eluted using a large volume of Et<sub>2</sub>O. The filtrate was then washed with saturated aqueous Na<sub>2</sub>S<sub>2</sub>O<sub>3</sub> and the organic layer was removed. The aqueous layer was extracted 2x with Et<sub>2</sub>O and then the combined organic layers were washed with brine, dried over MgSO<sub>4</sub>, filtered, concentrated under vacuum and purified by flash column chromatography to yield **15** (3.76 g, 7.92 mmol, 54% yield). <sup>1</sup>H NMR (600 MHz, CDCl<sub>3</sub>) δ 8.77 (dd, *J* = 8.3, 1.5 Hz, 1H), 8.61 (d, *J* = 8.3 Hz, 1H), 8.08 (br s, 1H), 7.83 (d, *J* = 7.8 Hz, 1H), 7.77 – 7.65 (m, 1H), 7.62 – 7.48 (m, 4H), 5.40 – 4.73 (m, 1H), 4.44 (d, *J* = 10.0 Hz, 1H), 4.33 (q, *J* = 8.6 Hz, 1H), 4.07 (br s, 1H), 2.79 (dt, *J* = 16.5, 8.1 Hz, 1H), 2.36 – 1.91 (m, 6H), 1.46 (s, 9H), 1.03 (s, 9H) ppm; <sup>13</sup>C NMR (126 MHz, CDCl<sub>3</sub>) two of the aryl carbon peaks and one of the alkyl carbon peaks could not be located and are believed to be under other peaks δ 169.8, 155.8, 137.6 (br), 131.7, 131.4, 130.1, 129.1, 126.45, 126.42, 126.0, 125.4, 125.1, 123.9, 122.2, 79.3, 68.0, 58.3, 48.9, 40.4, 35.4, 28.5, 26.4, 23.2 ppm; FT-IR (thin-film): 3440, 2973, 2870, 1710, 1647, 1494, 1452, 1412, 1392, 1366, 1328, 1303, 1232, 1167, 1060, 1006, 907, 765, 747, 727 cm<sup>-1</sup>; HRMS (FTMS + p ESI) calculated for C<sub>30</sub>H<sub>39</sub>N<sub>2</sub>O<sub>3</sub> [M+H]<sup>+</sup> 475.2955, found 475.2955; [α]<sub>D</sub> = -49.6° (c = 1.0, CHCl<sub>3</sub>).

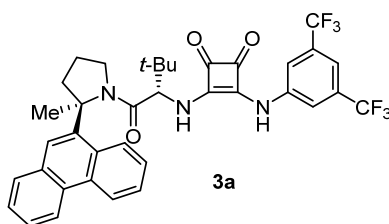

3a

**3-((3,5-bis(trifluoromethyl)phenyl)amino)-4-(((S)-3,3-dimethyl-1-((R)-2-methyl-2-(phenanthren-9-yl)pyrrolidin-1-yl)-1-oxobutan-2-yl)amino)cyclobut-3-ene-1,2-dione (3a):** Following a previously reported procedure,<sup>8</sup> Boc-protected amine **15** (400 mg, 0.84 mmol, 1 equiv.) was cooled to 0 °C and then HCl (4 mL of a 4 M solution in dioxane, 19 equiv.) was added dropwise over 2 minutes. The ice-bath was removed, and the reaction was allowed to continue for 1.5 hours, at which point TLC indicated complete consumption of the starting material. The reaction was then sparged

with nitrogen to remove HCl and then concentrated under vacuum. The solids were suspended in CH<sub>2</sub>Cl<sub>2</sub> (6.8 mL, 0.125 M) and Et<sub>3</sub>N was added (0.35 mL, 2.53 mmol, 3 equiv.) to freebase the ammonium salt. After 15 minutes, squaric ester **11** (286 mg, 0.84 mmol, 1 equiv.) was added, and the reaction was allowed to continue for 48 hours. Then an aqueous solution of NaOH (6.8 mL, 1 M) was added and the biphasic solution was stirred vigorously for 12 hours. The reaction was then diluted with CH<sub>2</sub>Cl<sub>2</sub> and water, and the organic layer was removed. The aqueous layer was extracted 3x with CH<sub>2</sub>Cl<sub>2</sub> and then the combined organic layers were washed with a 1:1 mixture of water and brine, dried over Na<sub>2</sub>SO<sub>4</sub>, filtered, concentrated under vacuum, and purified by flash column chromatography to yield squaramide **3a** (400 mg, 0.59 mmol, 70% yield). <sup>1</sup>H NMR (600 MHz, DMSO-*d*<sub>6</sub>) δ 10.06 (s, 1H), 8.76 (d, *J* = 8.2 Hz, 1H), 8.69 (d, *J* = 8.4 Hz, 1H), 7.99 (s, 2H), 7.97 – 7.72 (m, 4H), 7.70 (s, 1H), 7.61 (ddd, *J* = 8.3, 6.8, 1.5 Hz, 1H), 7.55 (s, 1H), 7.42 – 7.18 (m, 2H), 5.00 – 4.83 (m, 1H), 4.30 (q, *J* = 9.3 Hz, 1H), 4.16 – 4.03 (m, 1H), 2.57 (q, *J* = 10.9 Hz, 1H), 2.46 – 2.12 (m, 2H), 2.10 – 1.93 (m, 4H), 0.99 (s, 9H) ppm; <sup>13</sup>C NMR (126 MHz, DMSO-*d*<sub>6</sub>) one of the aryl carbon peaks could not be located and is believed to be under another peak, one of the alkyl carbon peaks could not be located and is believed to be under the DMSO solvent residual (compare to the peak at 40.4 in 1-naphthyl catalyst **3b**) δ 184.7, 180.6, 168.9, 167.2, 162.9, 141.0, 138.2, 131.5 (q, *J* = 33.0 Hz), 131.0, 130.9, 129.3, 128.7, 128.6, 126.7, 126.6, 125.23, 125.16, 124.4, 123.8, 123.1 (q, *J* = 273.5 Hz), 122.3, 117.7 (d, *J* = 4.1 Hz), 115.2 – 114.3 (m), 67.3, 61.2, 48.1, 35.1, 25.7, 25.0, 23.0 ppm; <sup>19</sup>F NMR (376 MHz, DMSO-*d*<sub>6</sub>) δ -61.82 ppm; FT-IR (thin-film): 3226, 3057, 2967, 1792, 1695, 1631, 1608, 1582, 1558, 1473, 1418, 1378, 1277, 1179, 1133, 907, 883, 726, 680 cm<sup>-1</sup>; HRMS (FTMS + p ESI) calculated for C<sub>37</sub>H<sub>34</sub>F<sub>6</sub>N<sub>3</sub>O<sub>3</sub> [M+H]<sup>+</sup> 682.2499, found 682.2493; [α]<sub>D</sub> = -127.2° (c = 1.0, CHCl<sub>3</sub>).

### Characterization of sub-optimal catalysts:

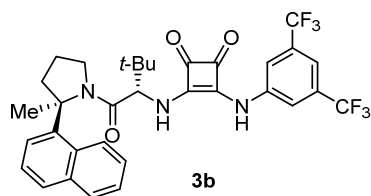

**3-((3,5-bis(trifluoromethyl)phenyl)amino)-4-(((S)-3,3-dimethyl-1-((R)-2-methyl-2-(naphthalen-1-yl)pyrrolidin-1-yl)-1-oxobutan-2-yl)amino)cyclobut-3-ene-1,2-dione (3b):** Prepared according to the route described above from commercially available 1-acetonaphthone using procedure A for the allylation.  $^1\text{H NMR}$  (600 MHz,  $\text{DMSO-d}_6$ )  $\delta$  10.09 (s, 1H), 7.99 (s, 2H), 7.90 – 7.76 (m, 3H), 7.71 (d,  $J = 8.1$  Hz, 1H), 7.66 (s, 1H), 7.56 – 7.47 (m, 1H), 7.40 (t,  $J = 7.8$  Hz, 1H), 7.21 – 7.12 (m, 2H), 4.92 (d,  $J = 10.1$  Hz, 1H), 4.24 (q,  $J = 9.1$  Hz, 1H), 4.11 – 4.03 (m, 1H), 2.50 – 2.42 (m, 1H), 2.32 – 2.21 (m, 1H), 2.16 – 2.04 (m, 1H), 2.01 – 1.91 (s, 4H), 0.99 (s, 9H) ppm;  $^{13}\text{C NMR}$  (126 MHz,  $\text{DMSO-d}_6$ ) one of the aryl carbon peaks could not be located and is believed to be under another peak  $\delta$  184.6, 180.5, 168.9, 167.0, 162.9, 141.0, 140.3, 134.4, 131.5 (q,  $J = 33.0$  Hz), 129.4, 129.0, 127.5, 125.0, 124.4, 124.3, 123.7, 123.1 (q,  $J = 272.8$  Hz), 117.7 (d,  $J = 4.1$  Hz), 115.2 – 114.4 (m), 67.3, 61.2, 48.1, 40.4, 35.2, 25.7, 24.8, 23.0 ppm;  $^{19}\text{F NMR}$  (376 MHz,  $\text{DMSO-d}_6$ )  $\delta$  -61.93 ppm; **FT-IR** (thin-film): 3219, 2054, 2967, 1793, 1697, 1631, 1608, 1583, 1560, 1475, 1420, 1379, 1278, 1181, 1135, 929, 909, 882, 797, 777, 732, 702, 680  $\text{cm}^{-1}$ ; **HRMS** (FTMS + p ESI) calculated for  $\text{C}_{33}\text{H}_{32}\text{F}_6\text{N}_3\text{O}_3$   $[\text{M}+\text{H}]^+$  632.2342, found 632.2335;  $[\alpha]_{\text{D}} = -107^\circ$  ( $c = 1.0$ ,  $\text{CHCl}_3$ ).

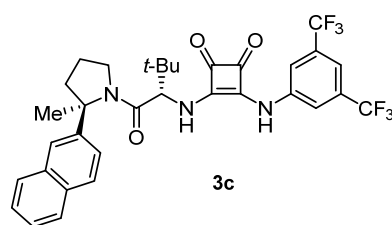

**3-((3,5-bis(trifluoromethyl)phenyl)amino)-4-(((S)-3,3-dimethyl-1-((R)-2-methyl-2-(naphthalen-2-yl)pyrrolidin-1-yl)-1-oxobutan-2-yl)amino)cyclobut-3-ene-1,2-dione (3c):** Prepared according to the route described above from commercially available 2-acetonaphthone using procedure B for the allylation.  $^1\text{H NMR}$  (600 MHz,  $\text{DMSO-d}_6$ )  $\delta$  10.44 (s, 1H), 8.20 (d,  $J = 10.0$  Hz, 1H), 8.08 (s, 2H), 7.82 – 7.71 (m, 3H), 7.71 – 7.57 (m, 2H), 7.44 – 7.33 (m, 2H), 7.30 (ddd,  $J = 8.1, 6.7, 1.3$  Hz, 1H), 5.07 (d,  $J = 9.9$  Hz, 1H), 4.15 (ddd,  $J = 9.9, 7.5, 5.1$  Hz, 1H), 3.89 (dt,  $J = 9.9, 7.2$  Hz, 1H), 2.09 (ddd,  $J = 12.5, 8.5, 6.4$  Hz, 1H), 2.03 (dt,  $J = 12.3, 6.0$  Hz, 1H), 2.00 – 1.91 (m, 4H), 1.83 (tdd,  $J = 14.1, 11.7, 5.5$  Hz, 1H), 1.03 (s, 9H) ppm;  $^{13}\text{C NMR}$  (126 MHz,  $\text{DMSO-d}_6$ )  $\delta$  184.6, 180.6, 169.3, 167.5, 162.7, 143.7, 141.2, 132.7, 131.5, 131.4 (q,  $J = 33.0$  Hz), 127.8, 127.5, 127.1, 125.6, 125.3, 123.8, 123.2 (q,  $J = 272.8$  Hz), 123.1, 117.9 (d,  $J = 4.7$  Hz), 115.0 – 114.1 (m), 67.0, 61.5, 49.7, 43.7, 35.8, 25.8, 24.2, 22.3 ppm;  $^{19}\text{F NMR}$  (376 MHz,  $\text{DMSO-d}_6$ )  $\delta$  -61.95 ppm; **FT-IR** (thin-film): 3213, 3058, 2968, 1792, 1696, 128, 1607, 1581, 1557, 1473, 1420, 1377, 1276, 1178, 1131, 928, 908, 883, 815, 731, 702, 680  $\text{cm}^{-1}$ ; **HRMS** (FTMS + p ESI) calculated for  $\text{C}_{33}\text{H}_{32}\text{F}_6\text{N}_3\text{O}_3$   $[\text{M}+\text{H}]^+$  632.2342, found 632.2344;  $[\alpha]_{\text{D}} = 49.8^\circ$  ( $c = 1.0$ ,  $\text{CHCl}_3$ ).

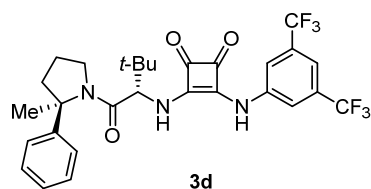

**3-((3,5-bis(trifluoromethyl)phenyl)amino)-4-(((S)-3,3-dimethyl-1-((R)-2-methyl-2-phenylpyrrolidin-1-yl)-1-oxobutan-2-yl)amino)cyclobut-3-ene-1,2-dione (3d):** Prepared according to the route described above from commercially available acetophenone using procedure B for the allylation.  $^1\text{H NMR}$  (600 MHz,  $\text{DMSO-d}_6$ )  $\delta$  10.47 (s, 1H), 8.25 (d,  $J = 10.0$  Hz, 1H), 8.08 (s, 2H), 7.63 (s, 1H), 7.22 (dd,  $J = 8.4, 7.0$  Hz, 2H), 7.20 – 7.16 (m, 2H), 7.13 – 7.09 (m, 1H), 5.03 (d,  $J = 9.9$  Hz, 1H), 4.03 (ddd,  $J = 9.5, 7.5, 4.0$  Hz, 1H), 3.82 (ddd,  $J = 9.9, 8.3, 6.8$  Hz, 1H), 2.04 (ddd,  $J = 12.0, 9.8, 6.1$  Hz, 1H), 1.95 – 1.86 (m, 2H), 1.84 (s, 3H), 1.76 – 1.66 (m, 1H), 1.02 (s, 9H) ppm;  $^{13}\text{C NMR}$  (126 MHz,  $\text{DMSO-d}_6$ )  $\delta$  184.5, 180.4, 169.1, 167.4, 162.5, 146.0, 141.1, 131.4 (q,  $J = 33.0$  Hz), 127.8, 125.7, 124.8, 123.2 (q,  $J = 272.9$  Hz), 117.9 (d,  $J = 4.0$  Hz), 114.7, 67.0, 61.4, 49.6, 44.0, 36.0, 25.7, 24.6, 22.0 ppm;  $^{19}\text{F NMR}$  (376 MHz,  $\text{DMSO-d}_6$ )  $\delta$  -61.87 ppm; **FT-IR** (thin-film): 3226, 3060, 2970, 1794, 1697, 1630, 1602, 1584, 1557, 1476, 1422, 1379, 1277, 1180, 1134, 929, 882, 761, 733, 699, 681  $\text{cm}^{-1}$ ; **HRMS** (FTMS + p ESI) calculated for  $\text{C}_{29}\text{H}_{30}\text{F}_6\text{N}_3\text{O}_3$   $[\text{M}+\text{H}]^+$  582.2186, found 582.2185;  $[\alpha]_{\text{D}} = 6.2^\circ$  ( $c = 1.0$ ,  $\text{CHCl}_3$ ).

## Synthesis and Characterization of Substrates

### Synthesis of 3-substituted oxetanes from 2-substituted 1,3-propane diols:

Known oxetanes **1a**<sup>9</sup> and **1p**<sup>10</sup> and novel oxetanes <sup>13</sup>C<sub>2</sub>-**1a**, **1n**, **1o**, and **1u** were prepared from the corresponding propane-1,3-diol derivatives according to a literature procedure.<sup>11</sup>

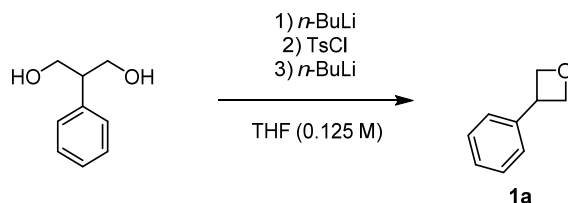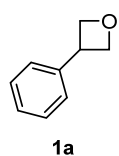

**3-phenyloxetane (1a):** 2-phenylpropane-1,3-diol (3.5 g, 23 mmol, 1 equiv.) was dissolved in THF (180 mL, 0.125 M) and cooled to 0 °C. A solution of *n*-BuLi in hexanes (9.2 mL of a 2.5 M solution, 23 mmol, 1 equiv.) was added dropwise, and the resulting suspension was stirred at 0 °C for 15 minutes before *p*-toluenesulfonyl chloride (4.38 g, 23 mmol, 1 equiv.) was added in 3 portions. The reaction was allowed to continue at 0 °C, gradually turning clear. After 1 hour, a solution of *n*-BuLi in hexanes (9.2 mL of a 2.5 M solution, 23 mmol, 1 equiv.) was added over 1.5 minutes, and the reaction was then warmed to 50 °C and allowed to continue overnight. The following day, the reaction was cooled to room temperature, diluted with Et<sub>2</sub>O and quenched by the addition of water. The organic layer was removed, and the aqueous layer was extracted 3x with Et<sub>2</sub>O. The combined organic layers were washed with brine, dried over MgSO<sub>4</sub>, filtered, concentrated under vacuum, and purified by flash column chromatography to yield oxetane **1a** (1.78 g, 13.27 mmol, 58% yield). The spectral data were consistent with a previous literature report<sup>9</sup>: <sup>1</sup>H NMR (600 MHz, CDCl<sub>3</sub>) δ 7.43-7.35 (m, 4H), 7.28 (td, *J* = 7.2, 1.5 Hz, 1H), 5.08 (dd, *J* = 8.3, 6.1 Hz, 2H), 4.79 (t, *J* = 6.4 Hz, 2H), 4.27-4.21 (m, 1H) ppm.

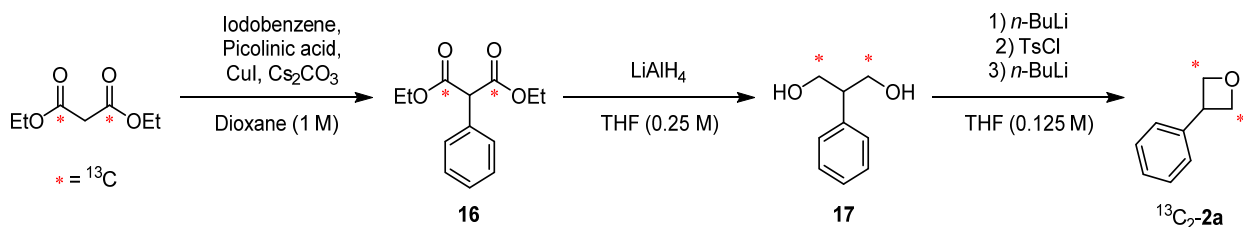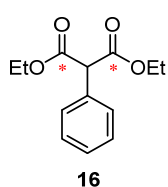

**diethyl 2-phenylmalonate-(1,3-<sup>13</sup>C<sub>2</sub>) (16):** Based on a previously-reported literature procedure,<sup>12</sup> copper(I) iodide (119 mg, 0.624 mmol, 0.1 equiv.), picolinic acid (154 mg, 1.249 mmol, 0.2 equiv.), and Cs<sub>2</sub>CO<sub>3</sub> (6.10 g, 18.73 mmol, 3 equiv.) were placed under an atmosphere of nitrogen and then suspended in dioxane (6.24 mL, 1 M). The suspension was sparged with nitrogen for 10 minutes and then iodobenzene (1.75 mL, 15.61 mmol, 2.5 equiv.) was added followed immediately by diethyl malonate-(1,3-<sup>13</sup>C<sub>2</sub>) (1.0 g, 6.24 mmol, 1 equiv.). The reaction was then heated to 50 °C and stirred vigorously. After 15 hours, the reaction was allowed to cool to room temperature, diluted with Et<sub>2</sub>O, and quenched with saturated aqueous NH<sub>4</sub>Cl. The organic layer was removed, and then the aqueous layer was extracted 3x with Et<sub>2</sub>O. The combined organic layers were washed with brine, dried over MgSO<sub>4</sub>, filtered, concentrated, and purified by flash column chromatography to yield diester **16** (1.373 g, 5.81 mmol, 93% yield). <sup>1</sup>H NMR (600 MHz, CDCl<sub>3</sub>) δ 7.42 – 7.39 (m, 2H), 7.38 – 7.31 (m, 3H), 4.61 (t, *J* = 8.4 Hz, 1H), 4.22 (dddq, *J* = 14.1, 10.7, 7.0, 3.5 Hz, 4H), 1.26 (t, *J* = 7.1 Hz, 6H) ppm.

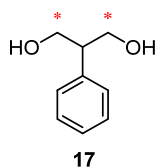

**2-phenylpropane-1,3-diol-(1,3-<sup>13</sup>C<sub>2</sub>) (17):** LiAlH<sub>4</sub> (654 mg, 17.2 mmol, 3 equiv.) was cooled to 0 °C under an atmosphere of nitrogen and suspended in THF (27.7 mL, 0.20 M). Then a solution of diethyl 2-phenylmalonate-(1,3-<sup>13</sup>C<sub>2</sub>) (**16**) in THF (1.37 g, 5.75 mmol, 1 equiv.) was added dropwise, and the reaction was allowed to continue overnight, gradually warming to room temperature as the ice-bath melted. The following day, the reaction was cooled to 0 °C, diluted with Et<sub>2</sub>O, and worked up according to Fieser's protocol by the careful sequential addition of 650 μL of water, 650 μL of a 15% aqueous NaOH solution, and 1.96 mL of water. The slurry was filtered through celite and washed with warm ethyl acetate as a rinse. The filtrate was concentrated under vacuum and purified by flash column chromatography to yield diol **17** (0.662 g, 4.29 mmol, 75% yield). <sup>1</sup>H NMR (600 MHz, CDCl<sub>3</sub>) δ 7.37 – 7.32 (m, 2H), 7.29 – 7.27 (m, 1H), 7.25 – 7.22 (m, 2H), 4.02 (dddd, *J* = 138, 10.9, 7.7, 5.7, 3.9 Hz, 2H), 3.96 (ddq, *J* = 143.9, 10.8, 5.4 Hz, 2H), 3.12 (tt, *J* = 7.6, 5.5 Hz, 1H), 2.00 (td, *J* = 5.7, 2.9 Hz, 2H) ppm.

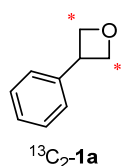

**3-phenyloxetane-(2,4-<sup>13</sup>C<sub>2</sub>) (<sup>13</sup>C<sub>2</sub>-**1a**):** 2-phenylpropane-1,3-diol-(1,3-<sup>13</sup>C<sub>2</sub>) (**17**) (0.662 g, 4.29 mmol, 1 equiv.) was dissolved in THF (30 mL, 0.14 M) and cooled to 0 °C. A solution of *n*-BuLi in hexanes (1.71 mL of a 2.5 M solution, 4.28 mmol, 1 equiv.) was added dropwise, and the resulting suspension was stirred at 0 °C for 30 minutes before a solution of *p*-toluenesulfonyl chloride in THF (0.819 g in 5 mL of THF, 4.29 mmol, 1 equiv.) was added. The reaction was allowed to continue at 0 °C for 1 hour, at which point a solution of *n*-BuLi in hexanes (1.71 mL of a 2.5 M solution, 4.28 mmol, 1 equiv.) was added dropwise. The reaction was then warmed to 60 °C and allowed to continue for 12 hours. The following day, the reaction was cooled to room temperature, diluted with Et<sub>2</sub>O and quenched by the addition of water. The organic layer was removed, and the aqueous layer was extracted 3x with Et<sub>2</sub>O. The combined organic layers were washed with brine, dried over MgSO<sub>4</sub>, filtered, concentrated under vacuum, and purified by flash column chromatography to yield oxetane <sup>13</sup>C<sub>2</sub>-**1a** (272 mg, 2.00 mmol, 46% yield). <sup>1</sup>H NMR (500 MHz, CDCl<sub>3</sub>) δ 7.43 – 7.35 (m, 4H), 7.30 – 7.25 (m, 1H), 5.26 – 5.19 (m, 1H), 4.97 – 4.90 (m, 2H), 4.67 – 4.61 (m, 1H), 4.24 (dddd, *J* = 15.3, 8.6, 4.2, 2.4 Hz, 1H) ppm; HRMS (FTMS + *p* EI) calculated for C<sub>7</sub><sup>13</sup>C<sub>2</sub>H<sub>10</sub>O• [M•]<sup>+</sup> 136.0793, found 136.0793.

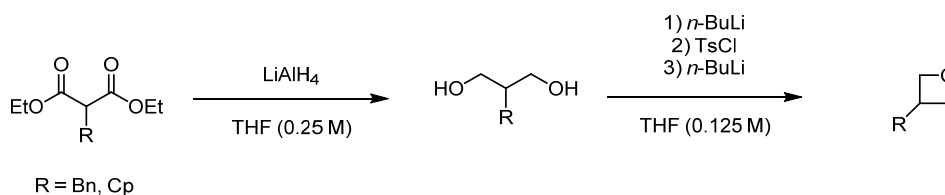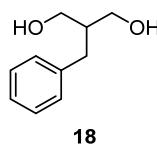

**2-benzylpropane-1,3-diol (18):** LiAlH<sub>4</sub> (854 mg, 22.5 mmol, 2.25 equiv.) was cooled to 0 °C under an atmosphere of nitrogen and suspended in THF (40 mL, 0.25 M). Then diethyl 2-benzylmalonate (2.35 mL, 10 mmol, 1 equiv.) was added dropwise, and the reaction was allowed to continue overnight, gradually warming to room temperature as the ice-bath melted. The following day, the reaction was cooled to 0 °C, diluted with Et<sub>2</sub>O, and worked up according to Fieser's protocol by the careful sequential addition of 850 μL of water, 850 μL of a 15% aqueous NaOH solution, and 2.55 mL of water. The reaction was then allowed to warm to room temperature and continue stirring for 2 hours, at which point MgSO<sub>4</sub> was added. After an additional 10 minutes of stirring, the slurry was filtered through a pad of celite using a large volume of additional Et<sub>2</sub>O as a rinse. The filtrate was concentrated under vacuum and purified by flash column chromatography to yield diol **18** (1.41 g, 8.49 mmol, 85% yield). The spectral data were consistent with a previous literature report<sup>13</sup>: <sup>1</sup>H NMR (600 MHz, CDCl<sub>3</sub>) δ 7.32 – 7.27 (m, 2H), 7.23 – 7.17 (m, 3H), 3.81 (dt, *J* = 10.2, 4.4 Hz, 2H), 3.68 (ddd, *J* = 11.3, 6.8, 4.9 Hz, 2H), 2.63 (d, *J* = 7.5 Hz, 2H), 2.23 – 2.10 (br, 2H), 2.07 (ddp, *J* = 11.1, 7.4, 3.5 Hz, 1H) ppm.

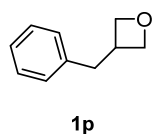

**3-benzylloxetane (1p):** 2-benzylpropane-1,3-diol (**18**) (1.411 g, 8.49 mmol, 1 equiv.) was dissolved in THF (68 mL, 0.125 M) and cooled to 0 °C. A solution of *n*-BuLi in hexanes (3.4 mL of a 2.5 M solution, 8.49 mmol, 1 equiv.) was added dropwise, and the resulting suspension was stirred at 0 °C for 15 minutes before *p*-toluenesulfonyl chloride (1.618 g, 8.49 mmol, 1 equiv.) was added in a single portion. The reaction was allowed to continue at 0 °C, gradually turning clear. After 1 hour, a solution of *n*-BuLi in hexanes (3.4 mL of a 2.5 M solution, 8.49 mmol, 1 equiv.) was added over 1.5 minutes, and the reaction was then warmed to 50 °C and allowed to continue overnight. The following day, the reaction was cooled to room temperature, diluted with Et<sub>2</sub>O and quenched by the addition of water. The organic layer was



removed, and the aqueous layer was extracted 3x with Et<sub>2</sub>O. The combined organic layers were washed with brine, dried over MgSO<sub>4</sub>, filtered, concentrated under vacuum, and purified by flash column chromatography to yield oxetane **1p** (628 mg, 4.24 mmol, 50% yield). The spectral data were consistent with a previous literature report<sup>10</sup>: <sup>1</sup>H NMR (600 MHz, CDCl<sub>3</sub>) δ 7.29 (t, *J* = 7.6 Hz, 2H), 7.23-7.19 (m, 1H), 7.14-7.11 (m, 2H), 4.79 (dd, *J* = 7.7, 6.0 Hz, 2H), 4.48 (t, *J* = 6.1 Hz, 2H), 3.31 (pt, *J* = 7.8, 6.2 Hz, 1H), 3.02 (d, *J* = 8.0 Hz, 2H) ppm.

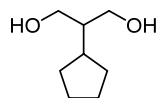

**19**

**2-cyclopentylpropane-1,3-diol (19):** LiAlH<sub>4</sub> (3.74 g, 98.56 mmol, 2.25 equiv.) was cooled to 0 °C under an atmosphere of nitrogen and suspended in THF (75 mL, 0.25 M). Then diethyl 2-cyclopentylmalonate (10.0 g, 43.80 mmol, 1 equiv.) was added dropwise, and the reaction was allowed to continue overnight, gradually warming to room temperature as the ice-bath melted. The following day, the reaction was cooled to 0 °C, diluted with Et<sub>2</sub>O, and worked up according to Fieser's protocol by the careful sequential addition of 3.7 mL of water, 3.7 mL of a 15% aqueous NaOH solution, and 11.2 mL of water. The reaction was then allowed to warm to room temperature and continue stirring for 2 hours, at which point MgSO<sub>4</sub> was added. After an additional 10 minutes of stirring, the slurry was filtered through a pad of celite using a large volume of additional Et<sub>2</sub>O as a rinse. The filtrate was concentrated under vacuum and purified by flash column chromatography to yield diol **19** (3.31 g, 22.95 mmol, 52% yield). The spectral data were consistent with a previous literature report<sup>14</sup>: <sup>1</sup>H NMR (400 MHz, CDCl<sub>3</sub>) δ 3.92 (dd, *J* = 10.6, 3.2 Hz, 2H), 3.73 (dd, *J* = 10.6, 7.6 Hz, 2H), 2.23 (s, 2H), 1.85 – 1.75 (m, 2H), 1.74 – 1.43 (m, 6H), 1.16 (p, *J* = 8.8 Hz, 2H) ppm.

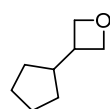

**1o**

**3-cyclopentylloxetane (1o):** 2-cyclopentylpropane-1,3-diol (**19**) (0.851 g, 5.90 mmol, 1 equiv.) was dissolved in THF (47 mL, 0.125 M) and cooled to 0 °C. A solution of *n*-BuLi in hexanes (2.36 mL of a 2.5 M solution, 5.90 mmol, 1 equiv.) was added dropwise, and the resulting suspension was stirred at 0 °C for 15 minutes before *p*-toluenesulfonyl chloride (1.18 g, 5.90 mmol, 1 equiv.) was added in a single portion. The reaction was allowed to continue at 0 °C, gradually turning clear. After 1 hour, a solution of *n*-BuLi in hexanes (2.36 mL of a 2.5 M solution, 5.90 mmol, 1 equiv.) was added over 1.5 minutes, and the reaction was then warmed to 50 °C and allowed to continue overnight. The following day, the reaction was cooled to room temperature, diluted with Et<sub>2</sub>O and quenched by the addition of water. The organic layer was removed, and the aqueous layer was extracted 3x with Et<sub>2</sub>O. The combined organic layers were washed with brine, dried over MgSO<sub>4</sub>, filtered, concentrated under vacuum, and purified by flash column chromatography to yield oxetane **1o** (314 mg, 2.49 mmol, 42% yield). <sup>1</sup>H NMR (600 MHz, CDCl<sub>3</sub>) δ 4.76 (dd, *J* = 7.9, 5.9 Hz, 2H), 4.41 (t, *J* = 6.1 Hz, 2H), 2.84 (dt, *J* = 9.6, 7.9, 6.3 Hz, 1H), 2.24 (dp, *J* = 9.6, 7.8 Hz, 1H), 1.80 – 1.66 (m, 2H), 1.66 – 1.47 (m, 4H), 1.11 – 1.01 (m, 2H) ppm; <sup>13</sup>C NMR (151 MHz, CDCl<sub>3</sub>) δ 77.0, 43.4, 40.2, 29.8, 25.4 ppm; FT-IR (thin-film): 2944, 2863, 1488, 1451, 1369, 1178, 1136, 1098, 978, 898, 834 cm<sup>-1</sup>; HRMS (FTMS + *p* CI) calculated for C<sub>8</sub>H<sub>15</sub>O [M+H]<sup>+</sup> 127.1117, found 127.1119.

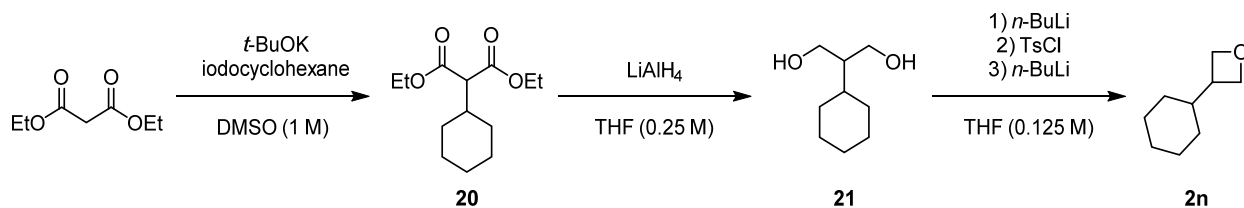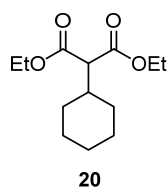

**20**

**diethyl 2-cyclohexylmalonate (20):** Following a literature procedure<sup>15</sup> potassium *tert*-butoxide (1.35 g, 12.00 mmol, 1.2 equiv.) was dissolved in DMSO (10 mL, 1 M). Then diethylmalonate (1.52 mL, 10 mmol, 1 equiv.) and iodocyclohexane (1.94 mL, 15 mmol, 1.5 equiv.) were added sequentially, and the reaction was heated to 80 °C and allowed to continue overnight under an atmosphere of nitrogen. The following day, the reaction was allowed to cool to room temperature and quenched by the addition of water (5 mL) and acetic acid (2 mL). The reaction was diluted with Et<sub>2</sub>O, the organic layer was removed, and the aqueous layer was extracted 3x with Et<sub>2</sub>O. The combined organic layers were then washed 5x with brine, dried over MgSO<sub>4</sub>, filtered, concentrated, and purified by flash column chromatography, but it still contained I<sub>2</sub>, so the product was dissolved in Et<sub>2</sub>O and washed with saturated aqueous sodium thiosulfate. The organic layer was removed, and the aqueous layer was extracted 2x w/ Et<sub>2</sub>O. The combined organic layers were then washed with brine, dried over MgSO<sub>4</sub>, filtered, concentrated, and re-purified by flash column chromatography to yield diester **20** (1.73 g, 7.14 mmol, 71% yield). The spectral data were

consistent with a previous literature report<sup>15</sup>: <sup>1</sup>H NMR (500 MHz, CDCl<sub>3</sub>) δ 4.18 (q, *J* = 7.2 Hz, 4H), 3.13 (d, *J* = 9.1 Hz, 1H), 2.08 (dddd, *J* = 14.8, 11.8, 8.9, 3.2 Hz, 1H), 1.78 – 1.61 (m, 5H), 1.35 – 1.22 (m, 8H), 1.16 (tt, *J* = 12.9, 3.2 Hz, 1H), 1.05 (qd, *J* = 13.0, 12.0, 3.8 Hz, 2H) ppm.

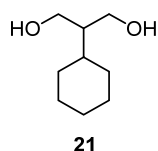

**2-cyclohexylpropane-1,3-diol (21):** LiAlH<sub>4</sub> (610 mg, 16.07 mmol, 2.25 equiv.) was cooled to 0 °C under an atmosphere of nitrogen and suspended in THF (18.6 mL). A solution of diethyl 2-cyclohexylmalonate (**20**) (1.73 g in 5 mL of THF, 7.14 mmol, 1 equiv.) was added dropwise using an additional 2x 2.5 mL of THF to aid transfer (giving a 0.25 M overall solution in THF), and the reaction was allowed to continue overnight, gradually warming to room temperature as the ice-bath melted. The following day, the reaction was cooled to 0 °C, diluted with Et<sub>2</sub>O, and worked up

according to Fieser's protocol by the careful sequential addition of 610 uL of water, 610 uL of a 15% aqueous NaOH solution, and 1.83 mL of water. The reaction was then allowed to warm to room temperature and continue stirring for 2 hours, at which point MgSO<sub>4</sub> was added. After an additional 10 minutes of stirring, the slurry was filtered through a pad of celite using a large volume of additional Et<sub>2</sub>O as a rinse. The filtrate was concentrated under vacuum and purified by flash column chromatography to yield diol **21** (1.00 g, 6.32 mmol, 88% yield). The spectral data were consistent with a previous literature report<sup>13</sup>: <sup>1</sup>H NMR (600 MHz, CDCl<sub>3</sub>) δ 3.87 (ddd, *J* = 10.6, 5.3, 3.7 Hz, 2H), 3.81 (ddd, *J* = 10.6, 7.6, 4.6 Hz, 2H), 2.17 (t, *J* = 5.0 Hz, 2H), 1.78 – 1.69 (m, 4H), 1.65 (dt, *J* = 13.1, 3.4, 1.7 Hz, 1H), 1.60 – 1.54 (m, 1H), 1.42 (tdt, *J* = 12.0, 6.3, 3.1 Hz, 1H), 1.23 (qt, *J* = 13.8, 3.8 Hz, 2H), 1.13 (qt, *J* = 12.7, 3.2 Hz, 1H), 1.01 (qd, *J* = 12.7, 11.9, 3.8 Hz, 2H) ppm.

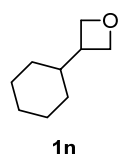

**3-cyclohexyloxetane (1n):** 2-cyclohexylpropane-1,3-diol (**21**) (1 g, 6.32 mmol, 1 equiv.) was dissolved in THF (50 mL, 0.125 M) and cooled to 0 °C. A solution of *n*-BuLi in hexanes (2.53 mL of a 2.5 M solution, 6.32 mmol, 1 equiv.) was added dropwise, and the resulting suspension was stirred at 0 °C for 15 minutes before *p*-toluenesulfonyl chloride (1.205 g, 6.32 mmol, 1 equiv.) was added in a single portion. The reaction was allowed to continue at 0 °C, gradually turning clear. After 1 hour, a solution of *n*-BuLi in hexanes (2.53 mL of a 2.5 M solution, 6.32 mmol, 1 equiv.) was added over 1.5 minutes,

and the reaction was then warmed to 50 °C and allowed to continue overnight. The following day, the reaction was cooled to room temperature, diluted with Et<sub>2</sub>O and quenched by the addition of water. The organic layer was removed, and the aqueous layer was extracted 3x with Et<sub>2</sub>O. The combined organic layers were washed with brine, dried over MgSO<sub>4</sub>, filtered, concentrated under vacuum, and purified by flash column chromatography to yield oxetane **1n** (582 mg, 4.15 mmol, 66% yield). <sup>1</sup>H NMR (600 MHz, CDCl<sub>3</sub>) δ 4.72 (ddd, *J* = 8.0, 5.9, 1.2 Hz, 2H), 4.46 (ddd, *J* = 7.0, 6.0, 1.2 Hz, 2H), 2.80 – 2.61 (m, 1H), 1.79 – 1.55 (m, 6H), 1.31 – 1.19 (m, 2H), 1.19 – 1.09 (m, 1H), 0.86 – 0.71 (m, 2H) ppm; <sup>13</sup>C NMR (151 MHz, CDCl<sub>3</sub>) δ 76.6, 41.8, 41.1, 29.9, 26.4, 26.0 ppm; FT-IR (thin-film): 2922, 2852, 1719, 1449, 1270, 1178, 980, 885 cm<sup>-1</sup>; HRMS (FTMS + *p* CI) calculated for C<sub>9</sub>H<sub>17</sub>O [M+H]<sup>+</sup> 141.1274, found 141.1275.

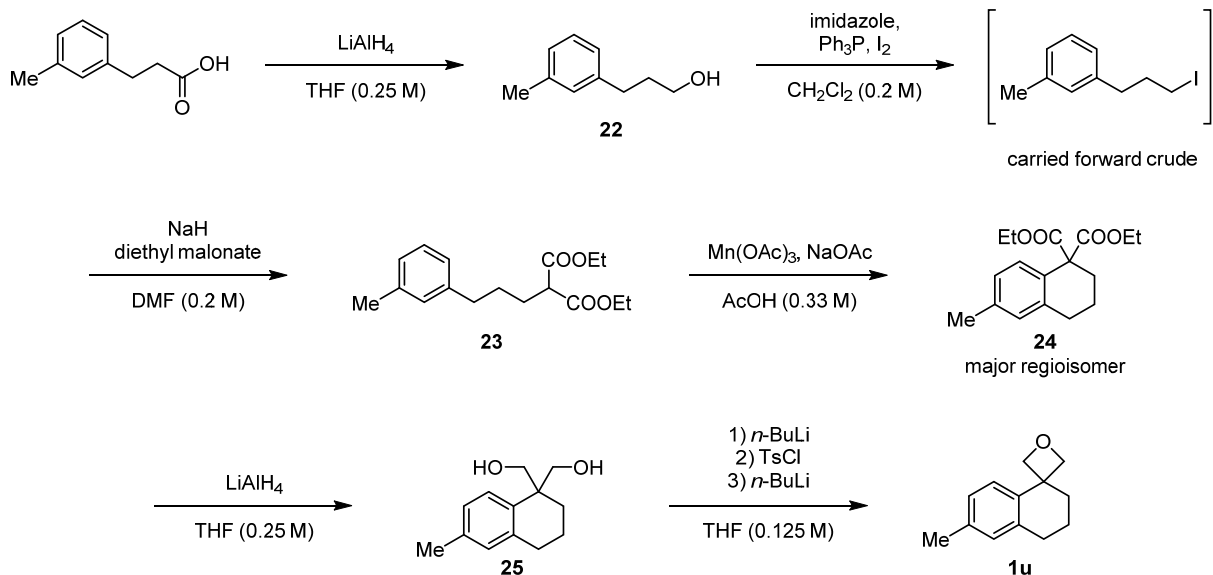

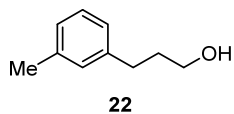

**3-(m-tolyl)propan-1-ol (22):** LiAlH<sub>4</sub> (1.16 g, 30.4 mmol, 2 equiv.) was cooled to 0 °C under an atmosphere of nitrogen and suspended in THF (30 mL). A solution of 3-(m-tolyl)propanoic acid (2.5 g in 30 mL THF, 15.2 mmol, 0.5 M, 1 equiv.) was added dropwise (giving a 0.25 M overall solution in THF). The reaction was allowed to proceed for 45 minutes, gradually warming as the ice-bath melted, before it was transferred to an oil-bath and refluxed overnight. The following day, the reaction was cooled to 0 °C, diluted with Et<sub>2</sub>O, and worked up according to Fieser's protocol by the careful sequential addition of 1.16 mL of water, 1.16 mL of a 15% aqueous NaOH solution, and 3.48 mL of water. The reaction was then allowed to warm to room temperature and continue stirring for 2 hours, at which point MgSO<sub>4</sub> was added. After an additional 10 minutes of stirring, the slurry was filtered through a pad of celite using a large volume of additional Et<sub>2</sub>O as a rinse. The filtrate was concentrated under vacuum and purified by flash column chromatography to yield alcohol **22** (2.26 g, 15.0 mmol, 99% yield). The spectral data were consistent with a previous literature report<sup>16</sup>: <sup>1</sup>H NMR (500 MHz, CDCl<sub>3</sub>) δ 7.18 (t, *J* = 7.5 Hz, 1H), 7.04-6.99 (m, 3H), 3.72-3.65 (m, 2H), 2.68 (dd, *J* = 8.7, 6.7 Hz, 2H), 2.34 (s, 3H), 1.90 (dtd, *J* = 9.1, 7.5, 7.0, 5.9 Hz, 2H), 1.33-1.25 (br, 1H) ppm.

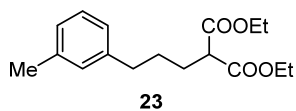

**diethyl 2-(3-(m-tolyl)propyl)malonate (23):** Alcohol **22** (2.21 g, 14.71 mmol, 1 equiv.) was dissolved in CH<sub>2</sub>Cl<sub>2</sub> (59 mL, 0.25 M) and cooled to 0 °C. Imidazole (1.40 g, 20.60 mmol, 1.4 equiv.), Ph<sub>3</sub>P (5.02 g, 19.13 mmol, 1.3 equiv.), and I<sub>2</sub> (5.04 g, 19.86 mmol, 1.35 equiv.) were added sequentially and the reaction was allowed to proceed at 0 °C for 1.5 hours, at which point TLC indicated complete consumption of the starting alcohol. The reaction was then quenched by the addition of saturated aqueous Na<sub>2</sub>S<sub>2</sub>O<sub>3</sub> and diluted with Et<sub>2</sub>O. The aqueous layer was removed, and the organic layer was washed 2x with saturated aqueous NH<sub>4</sub>Cl, followed by brine, dried over MgSO<sub>4</sub>, filtered, and concentrated under vacuum. The crude product was then suspended in hexanes and filtered through a 1-inch silica plug which was rinsed with additional hexanes. The filtrate from the plug was then concentrated under vacuum to yield the alkyl iodide (3.78 g, 14.53 mmol 99% yield), which was carried forward immediately without further purification. In a separate flask a dispersion of NaH (2.91 g of a 60 wt% dispersion, 72.6 mmol, 5.0 equiv.) was cooled to 0 °C under an atmosphere of nitrogen and suspended in DMF (60 mL). Diethyl malonate (11.25 mL, 74.1 mmol, 5.1 equiv.) was added dropwise, and the reaction was allowed to warm to room temperature. After 1 hour the reaction was again cooled to 0 °C and a solution of the crude iodide (3.78 g in 12.6 mL of DMF, 14.53 mmol, 1 equiv.) was added dropwise (giving a 0.2 M overall solution in DMF), and the reaction was heated to 60 °C overnight. The following day, the reaction was allowed to cool to room temperature, diluted with Et<sub>2</sub>O, and quenched by the addition of saturated aqueous NH<sub>4</sub>Cl. The aqueous layer was removed, and the organic layer was washed 5x with brine, dried over MgSO<sub>4</sub>, filtered, concentrated under vacuum, and purified by column chromatography to yield diester **23** (3.30 g, 11.29 mmol, 78% yield). <sup>1</sup>H NMR (600 MHz, CDCl<sub>3</sub>) δ 7.19 – 7.13 (m, 1H), 7.02 – 6.94 (m, 3H), 4.22 – 4.16 (m, 4H), 3.34 (td, *J* = 7.6, 1.2 Hz, 1H), 2.60 (t, *J* = 7.8 Hz, 2H), 2.32 (s, 3H), 1.99 – 1.90 (m, 2H), 1.69 – 1.60 (m, 2H), 1.26 (td, *J* = 7.1, 1.1 Hz, 6H) ppm; <sup>13</sup>C NMR (126 MHz, CDCl<sub>3</sub>) δ 169.5, 141.8, 138.0, 129.3, 128.4, 126.7, 125.5, 61.4, 52.0, 35.5, 29.2, 28.5, 21.5, 14.2 ppm; FT-IR (thin-film): 2981, 2936, 2863, 1748, 1729, 1609, 1462, 1446, 1368, 1335, 1297, 1237, 1208, 1776, 1142, 1096, 1025, 862, 782, 739, 670 cm<sup>-1</sup>; HRMS (FTMS + p EI) calculated for C<sub>17</sub>H<sub>24</sub>O<sub>4</sub>• [M•]<sup>+</sup> 292.1669, found 292.1669.

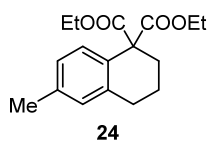

**diethyl 6-methyl-3,4-dihydronaphthalene-1,1(2H)-dicarboxylate (24):** Manganese(III) acetate dihydrate (7.45 g, 27.8 mmol, 2.5 equiv.) and NaOAc (2.28 g, 27.8 mmol, 2.5 equiv.) were added to a Schlenk flask and suspended in AcOH (28 mL). Then malonate **23** (3.25 g, 11.12 mmol, 1 equiv.) was added using an additional 5 mL of AcOH to aid transfer (giving a 0.33 M overall solution in AcOH). The reaction was then heated to 70 °C and allowed to continue overnight, with the solids gradually going into solution as the reaction proceeded. The following day, the reaction was cooled to room temperature and diluted with EtOAc and water. The aqueous layer was removed and the organic layer was washed sequentially with water, 2x with 1 M aqueous NaOH, saturated aqueous Na<sub>2</sub>S<sub>2</sub>O<sub>3</sub>, and brine and then dried over Na<sub>2</sub>SO<sub>4</sub>, filtered, and concentrated under vacuum to give an ~4.4 : 1 mixture of the 6-methyl and 8-methyl regioisomeric products, which were separable by flash column chromatography to yield desired regioisomer **24** (1.97 g, 6.78 mmol, 61% yield). <sup>1</sup>H NMR (500 MHz, CDCl<sub>3</sub>) δ 7.31 (dd, *J* = 8.2, 1.8 Hz, 1H), 7.02 – 6.96 (m, 1H), 6.92 (s, 1H), 4.29 – 4.15 (m, 4H), 2.78 (t, *J* = 6.5 Hz, 2H), 2.46 – 2.35 (m, 2H), 2.30 (s, 3H), 1.83 (dtd, *J* = 11.7, 6.4, 3.4 Hz, 2H), 1.26 (td, *J* = 7.1, 1.8 Hz, 6H) ppm; <sup>13</sup>C NMR (126 MHz, CDCl<sub>3</sub>) δ 171.9, 137.3, 137.0, 130.4, 130.0, 129.2, 126.7, 61.7, 58.8, 31.3, 29.4, 21.1, 20.0, 14.1 ppm; FT-IR (thin-film): 2979, 2939, 2872, 1725, 1504, 1445, 1389, 1365, 1286, 1241, 1188, 1152, 1130, 1084, 1045, 1026, 893, 857, 820, 768 cm<sup>-1</sup>; HRMS (FTMS + p EI) calculated for C<sub>17</sub>H<sub>22</sub>O<sub>4</sub>• [M•]<sup>+</sup> 290.1513, found 290.1513.

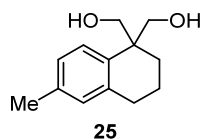

**(6-methyl-1,2,3,4-tetrahydronaphthalene-1,1-diol)dimethanol (25):** LiAlH<sub>4</sub> (579 mg, 15.27 mmol, 2.25 equiv.) was cooled to 0 °C under an atmosphere of nitrogen and suspended in THF (17 mL). A solution of cyclic malonate **24** (1.97 g in 5 mL of THF, 6.78 mmol, 1 equiv.) was added dropwise using an additional 2x 2.5 mL of THF to aid transfer (giving a 0.25 M overall solution in THF), and the reaction was allowed to continue overnight, gradually warming to

room temperature as the ice-bath melted. The following day, the reaction was cooled to 0 °C, diluted with Et<sub>2</sub>O, and worked up according to Fieser's protocol by the careful sequential addition of 580 uL of water, 580 uL of a 15% aqueous NaOH solution, and 1.74 mL of water. The reaction was then allowed to warm to room temperature and continue stirring for 2 hours, at which point MgSO<sub>4</sub> was added. After an additional 10 minutes of stirring, the slurry was filtered through a pad of celite using a large volume of additional Et<sub>2</sub>O as a rinse. The filtrate was concentrated under vacuum and purified by flash column chromatography to yield diol **25** (1.16 g, 5.62 mmol, 83% yield). <sup>1</sup>H NMR (500 MHz, CDCl<sub>3</sub>) δ 7.24 (d, *J* = 8.0 Hz, 1H), 6.99 (dtd, *J* = 8.1, 1.4, 0.7 Hz, 1H), 6.96 – 6.93 (m, 1H), 3.92 (dd, *J* = 11.0, 5.8 Hz, 2H), 3.80 – 3.71 (m, 2H), 2.74 (t, *J* = 6.3 Hz, 2H), 2.28 (d, *J* = 0.8 Hz, 3H), 1.98 – 1.90 (m, 4H), 1.88 – 1.76 (m, 2H) ppm; <sup>13</sup>C NMR (126 MHz, CDCl<sub>3</sub>) δ 138.7, 136.2, 134.5, 130.4, 127.0, 126.8, 70.1, 43.1, 30.6, 27.9, 21.0, 19.2 ppm; FT-IR (thin-film): 3334 (br), 3002, 2927, 2871, 1615, 1498, 1454, 1432, 1109, 1045, 1015, 987, 909, 853, 814, 729, 557 cm<sup>-1</sup>; HRMS (ESI-TOF) calculated for C<sub>13</sub>H<sub>18</sub>O<sub>2</sub>Na [M+Na]<sup>+</sup> 229.1199, found 229.1206.

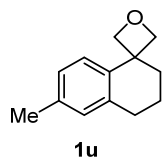

**6-methyl-3,4-dihydro-2H-spiro[naphthalene-1,3'-oxetane] (1u):** Diol **25** (1.10 g, 5.33 mmol, 1 equiv.) was dissolved in THF (42.7 mL, 0.125 M) and cooled to 0 °C. A solution of *n*-BuLi in hexanes (2.13 mL of a 2.5 M solution, 5.33 mmol, 1 equiv.) was added dropwise, and the resulting suspension was stirred at 0 °C for 15 minutes before *p*-toluenesulfonyl chloride (1.02 g, 5.33 mmol, 1 equiv.) was added in a single portion. The reaction was allowed to continue at 0 °C, gradually turning clear. After 1 hour, a solution of *n*-BuLi in hexanes (2.13 mL of a 2.5 M solution, 5.33

mmol, 1 equiv.) was added over 1.5 minutes, and the reaction was then warmed to 50 °C and allowed to continue overnight. The following day, the reaction was cooled to room temperature, diluted with Et<sub>2</sub>O and quenched by the addition of water. The organic layer was removed, and the aqueous layer was extracted 3x with Et<sub>2</sub>O. The combined organic layers were washed with brine, dried over MgSO<sub>4</sub>, filtered, concentrated under vacuum, and purified by flash column chromatography to yield oxetane **1u** (425.3 mg, 2.259 mmol, 42% yield). <sup>1</sup>H NMR (600 MHz, CDCl<sub>3</sub>) δ 7.81 (d, *J* = 8.0 Hz, 1H), 7.13 (dt, *J* = 8.0, 1.3 Hz, 1H), 6.90 (t, *J* = 1.4 Hz, 1H), 4.82 (d, *J* = 5.7 Hz, 2H), 4.63 (d, *J* = 5.8 Hz, 2H), 2.72 (t, *J* = 6.3 Hz, 2H), 2.32 (s, 3H), 2.22 – 2.15 (m, 2H), 1.76 – 1.69 (m, 2H) ppm; <sup>13</sup>C NMR (151 MHz, CDCl<sub>3</sub>) δ 136.8, 136.5, 136.3, 129.6, 127.7, 126.6, 85.8, 42.2, 35.8, 30.1, 21.0, 20.3 ppm; FT-IR (thin-film): 3001, 2923, 2861, 1614, 1501, 1487, 1446, 1432, 1275, 1154, 1043, 984, 951, 908, 891, 877, 816, 559 cm<sup>-1</sup>; HRMS (FTMS + p EI) calculated for C<sub>13</sub>H<sub>16</sub>O• [M•]<sup>+</sup> 188.1196, found 188.1194.

### Synthesis of 3-aryl oxetanes via cross coupling with 3-iodooxetane:

Known oxetanes **1b**,<sup>9</sup> **1e**,<sup>9</sup> **1f**,<sup>9</sup> and **1h**<sup>17</sup> and novel oxetanes **1c** and **1d** were prepared from 3-iodooxetane using a previously reported Ni-catalyzed cross-coupling.<sup>9</sup> Known oxetane **1g**<sup>18</sup> was prepared using the Ni-catalyzed cross-coupling followed by treatment with NaOEt to correct for partial transesterification during the cross-coupling.

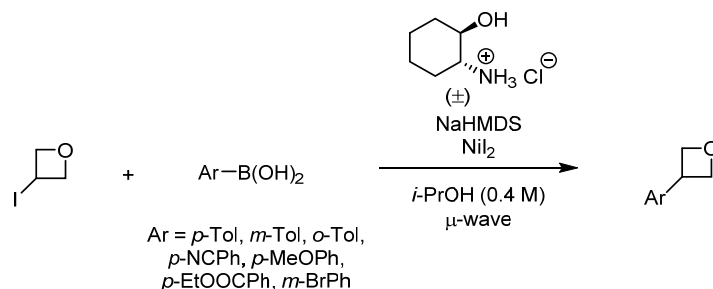

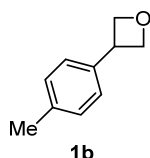

**3-(*p*-tolyl)oxetane (1b):** Following a literature procedure<sup>9</sup> *p*-tolylboronic acid (1.36 g, 10 mmol, 2 equiv.), NaHMDS (1.83 g, 10 mmol, 2 equiv.), NiI<sub>2</sub> (94 mg, 0.3 mmol, 0.06 equiv.), and *trans*-2-aminocyclohexanol hydrochloride (46 mg, 0.3 mmol, 0.06 equiv.) were added to a microwave vial and placed under an atmosphere of argon. The solids were suspended in argon-sparged *i*-PrOH (10 mL) and stirred under an atmosphere of argon for 10 minutes. A solution of 3-iodooxetane (0.92 g in 2.5 mL of *i*-PrOH, 5 mmol, 2 M, 1 equiv.) was added, and the vial was sealed under an

atmosphere of argon. The reaction was then heated to 80 °C in a microwave reactor for 20 minutes, after which it was allowed to cool to room temperature, diluted with EtOH, and filtered through a plug of celite topped with a Kimwipe using additional EtOH as a rinse. The crude product was concentrated under vacuum and purified by flash column chromatography to yield oxetane **1b** (565 mg, 3.81 mmol, 76% yield). The spectral data were consistent with a previous literature report<sup>9</sup>: <sup>1</sup>H NMR (500 MHz, CDCl<sub>3</sub>) δ 7.31-7.27 (m, 2H), 7.18 (dt, *J* = 7.7, 0.7 Hz, 2H), 5.06 (dd, *J* = 8.4, 6.0 Hz, 2H), 4.77 (dd, *J* = 6.9, 6.0 Hz, 2H), 4.20 (tt, *J* = 8.3, 6.9 Hz, 1H), 2.35 (s, 3H) ppm.

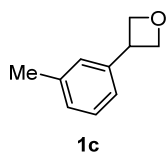

**3-(*m*-tolyl)oxetane (1c):** Following a literature procedure<sup>9</sup> *m*-tolylboronic acid (1.36 g, 10 mmol, 2 equiv.), NaHMDS (1.83 g, 10 mmol, 2 equiv.), NiI<sub>2</sub> (94 mg, 0.3 mmol, 0.06 equiv.), and *trans*-2-aminocyclohexanol hydrochloride (46 mg, 0.3 mmol, 0.06 equiv.) were added to a microwave vial and placed under an atmosphere of argon. The solids were suspended in argon-sparged *i*-PrOH (10 mL) and stirred under an atmosphere of argon for 10 minutes. A solution of 3-iodooxetane (0.92 g in 2.5 mL of *i*-PrOH, 5 mmol, 2 M, 1 equiv.) was added, and the vial was sealed under an

atmosphere of argon. The reaction was then heated to 80 °C in a microwave reactor for 20 minutes, after which it was allowed to cool to room temperature, diluted with EtOH, and filtered through a plug of celite topped with a Kimwipe using additional EtOH as a rinse. The crude product was concentrated under vacuum and purified by flash column chromatography to yield oxetane **1c** (482 mg, 3.25 mmol, 65% yield). <sup>1</sup>H NMR (500 MHz, CDCl<sub>3</sub>) δ 7.26 (t, *J* = 7.5 Hz, 1H), 7.24-7.21 (m, 1H), 7.19 (d, *J* = 7.7 Hz, 1H), 7.11-7.07 (m, 1H), 5.07 (dd, *J* = 8.4, 5.9 Hz, 2H), 4.78 (dd, *J* = 6.8, 6.0 Hz, 2H), 4.20 (tt, *J* = 8.3, 6.8 Hz, 1H), 2.38 (s, 3H) ppm; <sup>13</sup>C NMR (126 MHz, CDCl<sub>3</sub>) δ 141.4, 138.3, 128.5, 127.7, 127.4, 123.7, 78.8, 40.2, 21.3 ppm; FT-IR (thin-film): 3024, 2961, 2871, 1608, 1590, 1491, 1460, 982, 930, 864, 783, 702, 443 cm<sup>-1</sup>; HRMS (FTMS + p CI) calculated for C<sub>10</sub>H<sub>13</sub>O [M+H]<sup>+</sup> 149.0961, found 149.0961.

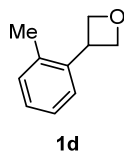

**3-(*o*-tolyl)oxetane (1d):** Following a literature procedure<sup>9</sup> *o*-tolylboronic acid (1.36 g, 10 mmol, 2 equiv.), NaHMDS (1.83 g, 10 mmol, 2 equiv.), NiI<sub>2</sub> (94 mg, 0.3 mmol, 0.06 equiv.), and *trans*-2-aminocyclohexanol hydrochloride (46 mg, 0.3 mmol, 0.06 equiv.) were added to a microwave vial and placed under an atmosphere of argon. The solids were suspended in argon-sparged *i*-PrOH (10 mL) and stirred under an atmosphere of argon for 10 minutes. A solution of 3-iodooxetane (0.92 g in 2.5 mL of *i*-PrOH, 5 mmol, 2 M, 1 equiv.) was added, and the vial was sealed under an atmosphere of

argon. The reaction was then heated to 80 °C in a microwave reactor for 20 minutes, after which it was allowed to cool to room temperature, diluted with EtOH, and filtered through a plug of celite topped with a Kimwipe using additional EtOH as a rinse. The crude product was concentrated under vacuum and purified by flash column chromatography to yield oxetane **1d** (467 mg, 3.15 mmol, 63% yield). <sup>1</sup>H NMR (600 MHz, CDCl<sub>3</sub>) δ 7.40 (d, *J* = 7.7 Hz, 1H), 7.28-7.24 (m, 1H), 7.20-7.14 (m, 2H), 5.04 (dd, *J* = 8.5, 5.8 Hz, 2H), 4.88 (dd, *J* = 7.6, 5.8 Hz, 2H), 4.52 (p, *J* = 8.0 Hz, 1H), 2.17 (s, 3H) ppm; <sup>13</sup>C NMR (126 MHz, CDCl<sub>3</sub>) δ 139.0, 135.6, 130.2, 126.8, 126.3, 125.4, 77.5, 37.5, 19.4 ppm; FT-IR (thin-film): 3021, 2946, 2870, 1491, 1460, 1014, 979, 913, 839, 753, 722, 580, 547, 456, 438 cm<sup>-1</sup>; HRMS (FTMS + p CI) calculated for C<sub>10</sub>H<sub>13</sub>O [M+H]<sup>+</sup> 149.0962, found 149.0962.

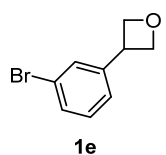

**3-(3-bromophenyl)oxetane (1e):** Following a literature procedure<sup>9</sup> *m*-bromophenylboronic acid (2.01 g, 10 mmol, 2 equiv.), NaHMDS (1.83 g, 10 mmol, 2 equiv.), NiI<sub>2</sub> (94 mg, 0.3 mmol, 0.06 equiv.), and *trans*-2-aminocyclohexanol hydrochloride (46 mg, 0.3 mmol, 0.06 equiv.) were added to a microwave vial and placed under an atmosphere of argon. The solids were suspended in argon-sparged *i*-PrOH (10 mL) and stirred under an atmosphere of argon for 10 minutes. A solution of 3-iodooxetane (0.92 g in 2.5 mL of *i*-PrOH, 5 mmol, 2 M, 1 equiv.) was added, and the vial was

sealed under an atmosphere of argon. The reaction was then heated to 80 °C in a microwave reactor for 20 minutes, after which it was allowed to cool to room temperature, diluted with EtOH, and filtered through a plug of celite topped with a Kimwipe using additional EtOH as a rinse. The crude product was concentrated under vacuum and purified by flash column chromatography to yield oxetane **1e** (201 mg, 0.94 mmol, 19% yield). The spectral data were consistent with a previous literature report<sup>9</sup>: <sup>1</sup>H NMR (500 MHz, CDCl<sub>3</sub>) δ 7.55 (t, *J* = 1.8 Hz, 1H), 7.41 (ddd,

$J = 7.9, 2.0, 1.0$  Hz, 1H), 7.35-7.31 (m, 1H), 7.24 (t,  $J = 7.8$  Hz, 1H), 5.07 (dd,  $J = 8.3, 6.1$  Hz, 2H), 4.74 (t,  $J = 6.4$  Hz, 2H), 4.19 (tt,  $J = 8.3, 6.6$  Hz, 1H) ppm.

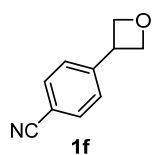

**4-(oxetan-3-yl)benzonitrile (1f):** Following a literature procedure<sup>9</sup> *p*-cyanophenylboronic acid (1.47 g, 10 mmol, 2 equiv.), NaHMDS (1.83 g, 10 mmol, 2 equiv.), NiI<sub>2</sub> (94 mg, 0.3 mmol, 0.06 equiv.), and *trans*-2-aminocyclohexanol hydrochloride (46 mg, 0.3 mmol, 0.06 equiv.) were added to a microwave vial and placed under an atmosphere of argon. The solids were suspended in argon-sparged *i*-PrOH (10 mL) and stirred under an atmosphere of argon for 10 minutes. A solution of 3-iodooxetane (0.92 g in 2.5 mL of *i*-PrOH, 5 mmol, 2 M, 1 equiv.) was added, and the vial was sealed under an atmosphere of argon. The reaction was then heated to 80 °C in a microwave reactor for 20 minutes, after which it was allowed to cool to room temperature, diluted with EtOH, and filtered through a plug of celite topped with a Kimwipe using additional EtOH as a rinse. The crude product was concentrated under vacuum and purified by flash column chromatography to yield oxetane **1f** (339 mg, 2.13 mmol, 43% yield). The spectral data were consistent with a previous literature report<sup>9</sup>: <sup>1</sup>H NMR (500 MHz, CDCl<sub>3</sub>)  $\delta$  7.69-7.65 (m, 2H), 7.53-7.50 (m, 2H), 5.11 (dd,  $J = 8.3, 6.2$  Hz, 2H), 4.72 (t,  $J = 6.3$  Hz, 2H), 4.26 (tt,  $J = 8.3, 6.4$  Hz, 1H) ppm.

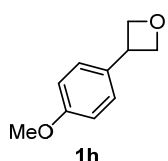

**3-(4-methoxyphenyl)oxetane (1h):** Based on a literature procedure<sup>9</sup> *p*-methoxyphenylboronic acid (1.52 g, 10 mmol, 2 equiv.), NaHMDS (1.83 g, 10 mmol, 2 equiv.), NiI<sub>2</sub> (94 mg, 0.3 mmol, 0.06 equiv.), and *trans*-2-aminocyclohexanol hydrochloride (46 mg, 0.3 mmol, 0.06 equiv.) were added to a microwave vial and placed under an atmosphere of argon. The solids were suspended in argon-sparged *i*-PrOH (10 mL) and stirred under an atmosphere of argon for 10 minutes. A solution of 3-iodooxetane (0.92 g in 2.5 mL of *i*-PrOH, 5 mmol, 2 M, 1 equiv.) was added, and the vial was sealed under an atmosphere of argon. The reaction was then heated to 80 °C in a microwave reactor for 20 minutes, after which it was allowed to cool to room temperature, diluted with EtOH and filtered through a plug of celite topped with a Kimwipe using additional EtOH as a rinse. The crude product was concentrated under vacuum and purified by flash column chromatography to yield oxetane **1h** (548 mg, 3.34 mmol, 67% yield). The spectral data were consistent with a previous literature report<sup>17</sup>: <sup>1</sup>H NMR (500 MHz, CDCl<sub>3</sub>)  $\delta$  7.35-7.31 (m, 2H), 6.93-6.89 (m, 2H), 5.05 (dd,  $J = 8.4, 6.0$  Hz, 2H), 4.75 (dd,  $J = 6.8, 6.0$  Hz, 2H), 4.19 (ddd,  $J = 15.3, 8.4, 6.8$  Hz, 1H), 3.81 (s, 3H) ppm.

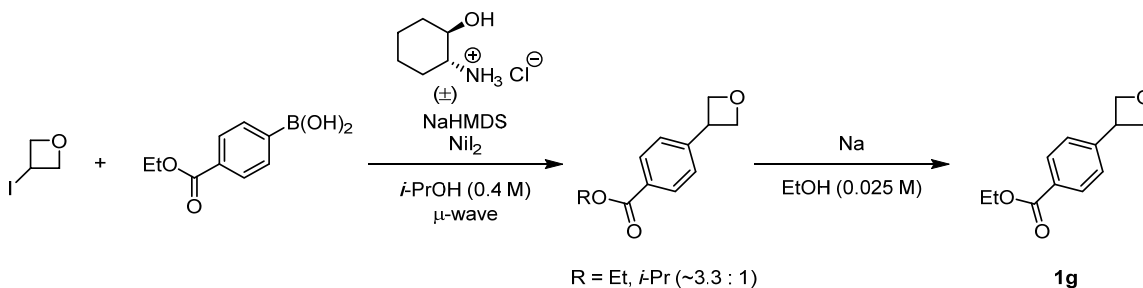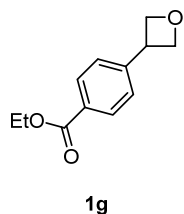

**ethyl-4-(oxetan-3-yl)benzoate (1g):** Based on a literature procedure<sup>9</sup> *p*-ethoxycarbonylphenylboronic acid (1.94 g, 10 mmol, 2 equiv.), NaHMDS (1.83 g, 10 mmol, 2 equiv.), NiI<sub>2</sub> (94 mg, 0.3 mmol, 0.06 equiv.), and *trans*-2-aminocyclohexanol hydrochloride (46 mg, 0.3 mmol, 0.06 equiv.) were added to a microwave vial and placed under an atmosphere of argon. The solids were suspended in argon-sparged *i*-PrOH (10 mL) and stirred under an atmosphere of argon for 10 minutes. A solution of 3-iodooxetane (0.92 g in 2.5 mL of *i*-PrOH, 5 mmol, 2 M, 1 equiv.) was added, and the vial was sealed under an atmosphere of argon. The reaction was then heated to 80 °C in a microwave reactor for 20 minutes, after which it was allowed to cool to room temperature, diluted with EtOH, and filtered through a plug of celite topped with a Kimwipe using additional EtOH as a rinse. The crude product was concentrated under vacuum and purified by flash column chromatography to yield an inseparable mixture of the desired ethyl and undesired isopropyl esters (740 mg of a ~3.3 : 1 mixture of ethyl and isopropyl esters). Sodium ethoxide was prepared in a separate flask by the gradual addition of sodium metal (116 mg, 5.04 mmol, 1.5 equiv.) to anhydrous ethanol (124 mL) being careful to avoid a significant exotherm. Once all the metal had dissolved, an ethanolic solution of the oxetanyl esters (740 mg of

mixed ester in 5 mL of ethanol, 3.36 mmol, 1 equiv.) was added using an additional 2x 2.5 mL ethanol rinse to aid transfer (giving a 0.025 M overall solution in ethanol) and the reaction was allowed to continue overnight under an atmosphere of nitrogen. The following day, it was quenched by the addition of saturated aqueous  $\text{NH}_4\text{Cl}$  and diluted with  $\text{Et}_2\text{O}$ . The organic layer was removed and the aqueous layer was extracted 3x w/  $\text{Et}_2\text{O}$ . The combined organic layers were washed with brine, dried over  $\text{MgSO}_4$ , filtered, and concentrated to give a crude oil containing a mixture of ethyl and isopropyl esters (~9.4 : 1 ethyl to isopropyl). Since conversion to the desired ethyl ester was incomplete, the material was resubmitted to identical transesterification conditions for 36 hours, worked up identically, and purified by flash column chromatography to yield oxetane **1g** (619 mg, 3.00 mmol, 60% yield over all steps). The spectral data were consistent with a previous literature report<sup>18</sup>:  $^1\text{H NMR}$  (600 MHz,  $\text{CDCl}_3$ )  $\delta$  8.06-8.03 (m, 2H), 7.48-7.45 (m, 2H), 5.10 (dd,  $J = 8.3, 6.1$  Hz, 2H), 4.77 (t,  $J = 6.3$  Hz, 2H), 4.38 (q,  $J = 7.1$  Hz, 2H), 4.28 (tt,  $J = 8.4, 6.6$  Hz, 1H), 1.40 (t,  $J = 7.1$  Hz, 3H) ppm.

### Synthesis of benzyl protected oxetanol:

Known oxetanes **1j**<sup>19</sup>, and **1v**<sup>20</sup> and novel oxetanes **1l** and **1s** were prepared by benzyl protection of the corresponding alcohols, which are commercially available. Novel oxetanes **1q**, **1r**, and **1t** were prepared by the addition of aryl Grignard reagents into 3-oxetanone followed by benzyl protection of the resulting alcohol.

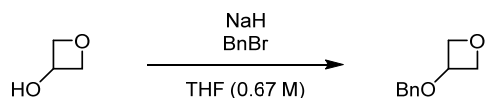

**1j** **3-(benzyloxy)oxetane (1j)**: A dispersion of NaH (600 mg of a 60 wt% dispersion, 15.0 mmol, 1.5 equiv.) was suspended in THF (15 mL, 0.67 M) at 0 °C and then oxetan-3-ol (0.64 mL, 10 mmol, 1 equiv.) was added dropwise. After 30 minutes, benzyl bromide (1.4 mL, 12.0 mmol, 1.2 equiv.) was added dropwise, and the reaction was allowed to continue overnight, gradually warming to room temperature as the ice bath melted. The following day, the reaction was diluted with  $\text{Et}_2\text{O}$  and quenched by the addition of saturated aqueous  $\text{NH}_4\text{Cl}$ . The organic layer was removed, and the aqueous layer was extracted 2x with  $\text{Et}_2\text{O}$ . The combined organic layers were washed with brine, dried over  $\text{MgSO}_4$ , filtered, concentrated under vacuum, and purified by flash column chromatography to yield oxetane **1j** (1.038 g, 6.32 mmol, 63% yield). The spectral data were consistent with a previous literature report<sup>19</sup>:  $^1\text{H NMR}$  (600 MHz,  $\text{CDCl}_3$ )  $\delta$  7.38-7.29 (m, 5H), 4.74-4.68 (m, 2H), 4.67-4.61 (m, 3H), 4.46 (s, 2H) ppm.

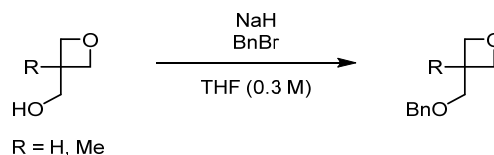

**1l** **3-((benzyloxy)methyl)oxetane (1l)**: A dispersion of NaH (300 mg of a 60 wt% dispersion, 7.5 mmol, 1.5 equiv.) was suspended in THF (16.7 mL, 0.3 M) at 0 °C and then oxetan-3-ylmethanol (441 mg, 5 mmol, 1 equiv.) was added dropwise. After 30 minutes, benzyl bromide (0.65 mL, 5.5 mmol, 1.1 equiv.) was added dropwise, and the reaction was allowed to continue overnight, gradually warming to room temperature as the ice bath melted. The following day, the reaction was diluted with  $\text{Et}_2\text{O}$  and quenched by the addition of saturated aqueous  $\text{NH}_4\text{Cl}$ . The organic layer was removed, and the aqueous layer was extracted 2x with  $\text{Et}_2\text{O}$ . The combined organic layers were washed with brine, dried over  $\text{MgSO}_4$ , filtered, concentrated under vacuum, and purified by flash column chromatography to yield oxetane **1l** (0.3795 g, 2.13 mmol, 43% yield).  $^1\text{H NMR}$  (600 MHz,  $\text{CDCl}_3$ )  $\delta$  7.38 – 7.32 (m, 4H), 7.32 – 7.28 (m, 1H), 4.80 (ddd,  $J = 7.8, 6.2, 0.6$  Hz, 2H), 4.55 (s, 2H), 4.46 (t,  $J = 6.0$  Hz, 2H), 3.71 (d,  $J = 6.9$  Hz, 2H), 3.29 – 3.21 (m, 1H) ppm;  $^{13}\text{C NMR}$  (126 MHz,  $\text{CDCl}_3$ )  $\delta$  138.2, 128.5, 127.82, 127.77, 74.7, 73.3, 71.8, 35.0 ppm; **FT-IR** (thin-film): 3030, 2961, 2869, 1496, 1454, 1369, 1206, 1091, 1028, 975, 859, 736, 697, 607  $\text{cm}^{-1}$ ; **HRMS** (FTMS + p CI) calculated for  $\text{C}_{11}\text{H}_{15}\text{O}_2$   $[\text{M}+\text{H}]^+$  179.1067, found 179.1067.

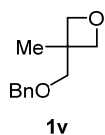

**3-((benzyloxy)methyl)-3-methyloxetane (1v):** A dispersion of NaH (900 mg of a 60 wt% dispersion, 22.5 mmol, 1.5 equiv.) was suspended in THF (50 mL, 0.3 M) at 0 °C and then (3-methyloxetan-3-yl)methanol (1.53 g, 15 mmol, 1 equiv.) was added dropwise. After 30 minutes, benzyl bromide (2.0 mL, 16.5 mmol, 1.1 equiv.) was added dropwise, and the reaction was allowed to continue overnight, gradually warming to room temperature as the ice bath melted. The following day, the reaction was diluted with Et<sub>2</sub>O and quenched by the addition of saturated aqueous NH<sub>4</sub>Cl. The organic layer was removed, and the aqueous layer was extracted 2x with Et<sub>2</sub>O. The combined organic layers were washed with brine, dried over MgSO<sub>4</sub>, filtered, concentrated under vacuum, and purified by flash column chromatography to yield oxetane **1v** (2.28 g, 11.85 mmol, 79% yield). The spectral data were consistent with a previous literature report<sup>20</sup>: <sup>1</sup>H NMR (600 MHz, CDCl<sub>3</sub>) δ 7.38-7.32 (m, 4H), 7.32-7.28 (m, 1H), 4.58 (s, 2H), 4.53 (d, *J* = 5.7 Hz, 2H), 4.36 (d, *J* = 5.7 Hz, 2H), 3.53 (s, 2H), 1.34 (s, 3H) ppm.

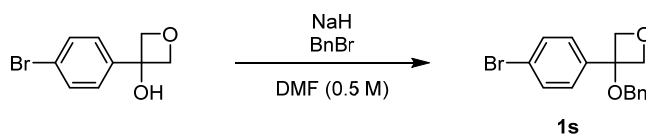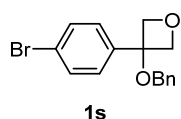

**3-((benzyloxy)methyl)-3-(4-bromophenyl)oxetane (1s):** A dispersion of NaH (65 mg of a 60 wt% dispersion, 1.64 mmol, 1.5 equiv.) was suspended in DMF (0.75 mL) at 0 °C, and a solution of 3-(*p*-bromophenyl)oxetan-3-ol (250 mg in 0.75 mL of DMF, 1.09 mmol, 1 equiv.) was added dropwise using an additional 2x 0.5 mL of DMF to aid transfer. After 30 minutes, benzyl bromide (0.26 mL, 2.18 mmol, 2 equiv.) was added dropwise, and the reaction was allowed to continue overnight, gradually warming to room temperature as the ice bath melted. The following day, the reaction was diluted with Et<sub>2</sub>O and quenched by the addition of saturated aqueous NH<sub>4</sub>Cl. The aqueous layer was removed, and the organic layer was washed 5x with brine, dried over MgSO<sub>4</sub>, filtered, concentrated under vacuum, and purified by flash column chromatography to yield oxetane **1s** (340 mg, 1.07 mmol, 98% yield). <sup>1</sup>H NMR (600 MHz, CDCl<sub>3</sub>) δ 7.60 – 7.57 (m, 2H), 7.44 – 7.41 (m, 2H), 7.38 – 7.28 (m, 5H), 5.02 – 4.99 (m, 2H), 4.84 – 4.80 (m, 2H), 4.26 (s, 2H) ppm; <sup>13</sup>C NMR (126 MHz, CDCl<sub>3</sub>) δ 139.2, 137.6, 132.1, 128.6, 127.9, 127.8, 127.6, 122.3, 81.1, 80.4, 66.6 ppm; FT-IR (thin-film): 3063, 3031, 2949, 2874, 1591, 1486, 1454, 1397, 1382, 1284, 1173, 1136, 1075, 1059, 1026, 1008, 983, 882, 822, 736, 696, 547 cm<sup>-1</sup>; HRMS (FTMS + p CI) calculated for C<sub>16</sub>H<sub>14</sub>BrO<sub>2</sub> [M-H]<sup>+</sup> 317.0172, found 317.0168.

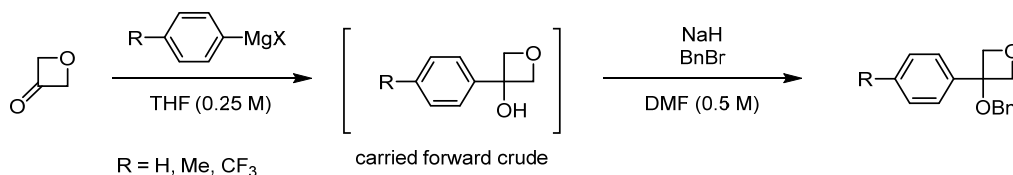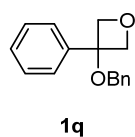

**3-((benzyloxy)methyl)-3-phenyloxetane (1q):** Oxetan-3-one (0.59 mL, 10 mmol, 1 equiv.) was dissolved in THF (40 mL, 0.25 M) and cooled to 0 °C. A solution of phenylmagnesium bromide (3.7 mL of 3 M solution in THF, 11 mmol, 1.1 equiv.) was added dropwise and the reaction was allowed to continue overnight, gradually warming to room temperature as the ice bath melted. The following day, the reaction was diluted with Et<sub>2</sub>O and quenched by the addition of saturated aqueous NH<sub>4</sub>Cl. The organic layer was removed, and the aqueous layer was extracted 2x with Et<sub>2</sub>O. The combined organic layers were washed with brine, dried over MgSO<sub>4</sub>, filtered, and concentrated under vacuum to yield 3-phenyloxetan-3-ol which was carried forward crude. In a separate flask, a dispersion of NaH (600 mg of a 60 wt% dispersion, 15.0 mmol, 1.5 equiv.) was suspended in DMF (10 mL) at 0 °C, and a solution of the crude 3-phenyloxetan-3-ol (assumed 1.50 g in 5 mL of DMF, 10 mmol, 1 equiv.) was added dropwise, using an additional 2x 2.5 mL of DMF to aid transfer (giving a 0.5 M overall solution in DMF). After 30 minutes, benzyl bromide (2.38 mL, 20.0 mmol, 2 equiv.) was added over 1 minute, and the reaction was allowed to continue overnight, gradually warming to room temperature as the ice bath melted. The following day, the reaction was diluted with Et<sub>2</sub>O and quenched by the addition of saturated aqueous NH<sub>4</sub>Cl. The aqueous layer was removed, and the organic layer was washed 5x with brine, dried over MgSO<sub>4</sub>, filtered, concentrated under vacuum, and purified by flash column chromatography to yield oxetane **1q**



(1.30 g, 5.41 mmol, 54% yield over the two steps).  $^1\text{H NMR}$  (600 MHz,  $\text{CDCl}_3$ )  $\delta$  7.55-7.52 (m, 2H), 7.49-7.44 (m, 2H), 7.40-7.33 (m, 5H), 7.33-7.28 (m, 1H), 5.04-5.01 (m, 2H), 4.92-4.90 (m, 2H), 4.27 (s, 2H) ppm;  $^{13}\text{C NMR}$  (126 MHz,  $\text{CDCl}_3$ )  $\delta$  139.9, 137.9, 128.8, 128.4, 128.1, 127.7, 127.5, 126.0, 81.1, 80.7, 66.3 ppm; **FT-IR** (thin-film): 3088, 3061, 3030, 2949, 2874, 1716, 1496, 1448, 1383, 1277, 1175, 1134, 1060, 1022, 983, 882, 758, 737, 700, 550  $\text{cm}^{-1}$ ; **HRMS** (FTMS + p CI) calculated for  $\text{C}_{16}\text{H}_{17}\text{O}_2$   $[\text{M}+\text{H}]^+$  241.1223, found 241.1222.

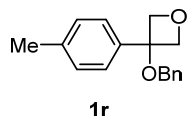

**3-(benzyloxy)-3-(*p*-tolyl)oxetane (1r):** Oxetan-3-one (0.59 mL, 10 mmol, 1 equiv.) was dissolved in THF (40 mL, 0.25 M) and cooled to 0 °C. A solution of *p*-tolylmagnesium bromide (11 mL of 1 M solution in THF, 11 mmol, 1.1 equiv.) was added over 1 minute and the reaction was allowed to continue overnight, gradually warming to room temperature as the ice bath melted. The following day, the reaction was diluted with  $\text{Et}_2\text{O}$  and quenched by the addition of saturated aqueous  $\text{NH}_4\text{Cl}$ . The organic layer was removed, and the aqueous layer was extracted 2x with  $\text{Et}_2\text{O}$ . The combined organic layers were washed with brine, dried over  $\text{MgSO}_4$ , filtered, and concentrated under vacuum to yield 3-*p*-tolylloxetan-3-ol which was carried forward crude. In a separate flask, a dispersion of NaH (600 mg of a 60 wt% dispersion, 15.0 mmol, 1.5 equiv.) was suspended in DMF (10 mL) at 0 °C, and a solution of the crude 3-*p*-tolylloxetan-3-ol (assumed 1.64 g in 5 mL of DMF, 10 mmol, 1 equiv.) was added dropwise, using an additional 2x 2.5 mL of DMF to aid transfer (giving a 0.5 M overall solution in DMF). After 30 minutes, benzyl bromide (2.38 mL, 20.0 mmol, 2 equiv.) was added over 1 minute, and the reaction was allowed to continue overnight, gradually warming to room temperature as the ice bath melted. The following day, the reaction was diluted with  $\text{Et}_2\text{O}$  and quenched by the addition of saturated aqueous  $\text{NH}_4\text{Cl}$ . The aqueous layer was removed, and the organic layer was washed 5x with brine, dried over  $\text{MgSO}_4$ , filtered, concentrated under vacuum, and purified by flash column chromatography to yield oxetane **1r** (1.44 g, 5.66 mmol, 57% yield over the two steps).  $^1\text{H NMR}$  (600 MHz,  $\text{CDCl}_3$ )  $\delta$  7.42 – 7.39 (m, 2H), 7.37 – 7.32 (m, 4H), 7.31 – 7.25 (m, 3H), 5.01 – 4.98 (m, 2H), 4.9-4.87 (m, 2H), 4.24 (s, 2H), 2.39 (s, 3H) ppm;  $^{13}\text{C NMR}$  (126 MHz,  $\text{CDCl}_3$ )  $\delta$  138.0, 137.9, 136.9, 129.5, 128.5, 127.7, 127.6, 126.0, 81.3, 80.7, 66.3, 21.2 ppm; **FT-IR** (thin-film): 3030, 2948, 2873, 1608, 1514, 1497, 1454, 1381, 1276, 1172, 1131, 1116, 1062, 1026, 1017, 981, 911, 882, 816, 732, 696, 545  $\text{cm}^{-1}$ ; **HRMS** (FTMS + p CI) calculated for  $\text{C}_{17}\text{H}_{17}\text{O}_2$   $[\text{M}-\text{H}]^+$  253.1223, found 253.1224.

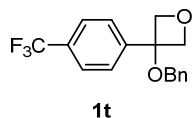

**3-(benzyloxy)-3-(4-(trifluoromethyl)phenyl)oxetane (1t):** Magnesium turnings (292 mg, 12 mmol, 1.2 equiv.) were flame-dried under vacuum, placed under an atmosphere of nitrogen, and then covered with a minimal volume of THF (3 mL). A drop of 1,2-dibromoethane was added followed by the gradual, simultaneous addition of 1-iodo-4-(trifluoromethyl)benzene (1.76 mL, 12 mmol, 1.2 equiv.) and THF (9 mL), being careful to avoid a significant exotherm. The reaction was allowed to continue for 2 hours, at which point no solid magnesium was visible. In a separate flask oxetan-3-one (0.59 mL, 10 mmol, 1 equiv.) was dissolved in THF (40 mL, 0.25 M) and cooled to 0 °C. The solution of Grignard (~1 M) was then added dropwise to the solution of oxetan-3-one, and the reaction was allowed to continue overnight, gradually warming to room temperature as the ice bath melted. The following day, the reaction was diluted with  $\text{Et}_2\text{O}$  and quenched by the addition of saturated aqueous  $\text{NH}_4\text{Cl}$ . The organic layer was removed, and the aqueous layer was extracted 2x with  $\text{Et}_2\text{O}$ . The combined organic layers were washed with brine, dried over  $\text{MgSO}_4$ , filtered, and concentrated under vacuum to yield 3-*p*-(trifluoromethyl)phenylloxetan-3-ol which was carried forward crude. In a separate flask, a dispersion of NaH (600 mg of a 60 wt% dispersion, 15.0 mmol, 1.5 equiv.) was suspended in DMF (10 mL) at 0 °C, and a solution of the crude 3-*p*-(trifluoromethyl)phenylloxetan-3-ol (assumed 2.18 g in 5 mL of DMF, 10 mmol, 1 equiv.) was added dropwise, using an additional 2x 2.5 mL of DMF to aid transfer (giving a 0.5 M overall solution in DMF). After 30 minutes, benzyl bromide (2.38 mL, 20.0 mmol, 2 equiv.) was added over 1 minute, and the reaction was allowed to continue overnight, gradually warming to room temperature as the ice bath melted. The following day, the reaction was diluted with  $\text{Et}_2\text{O}$  and quenched by the addition of saturated aqueous  $\text{NH}_4\text{Cl}$ . The aqueous layer was removed, and the organic layer was washed 5x with brine, dried over  $\text{MgSO}_4$ , filtered, concentrated under vacuum, and purified by flash column chromatography to yield oxetane **1t** (1.24 g, 4.01 mmol, 40% yield over the two steps).  $^1\text{H NMR}$  (600 MHz,  $\text{CDCl}_3$ )  $\delta$  7.74 – 7.68 (m, 4H), 7.39 – 7.29 (m, 5H), 5.07 – 5.04 (m, 2H), 4.85 – 4.82 (m, 2H), 4.30 (s, 3H) ppm;  $^{13}\text{C NMR}$  (126 MHz,  $\text{CDCl}_3$ )  $\delta$  144.3, 137.5, 130.5 (q,  $J = 32.6$  Hz), 128.7, 128.0, 127.6, 126.5, 126.0 (q,  $J = 3.8$  Hz), 124.1 (q,  $J = 272.1$  Hz), 81.1, 80.4, 66.8 ppm;  $^{19}\text{F NMR}$  (376 MHz,  $\text{CDCl}_3$ )  $\delta$  -62.62 ppm; **FT-IR** (thin-film): 2950, 2876, 1497, 1453, 1415, 1387, 1339, 1175, 1156, 1113, 1093, 1077, 1060, 1016, 979, 882, 845, 831, 750, 702, 603  $\text{cm}^{-1}$ ; **HRMS** (FTMS + p APCI corona) calculated for  $\text{C}_{17}\text{H}_{16}\text{F}_3\text{O}_2$   $[\text{M}+\text{H}]^+$  309.1097, found 309.1095.

### Syntheses of other substrates:

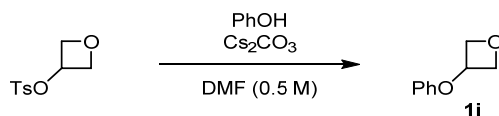

**3-phenoxyoxetane (1i):** Oxetan-3-yl 4-methylbenzenesulfonate (913 mg, 4 mmol, 1 equiv.) was dissolved in DMF (8 mL, 0.5 M) to which was added phenol (452 mg, 4.8 mmol, 1.2 equiv.) and Cs<sub>2</sub>CO<sub>3</sub> (5.21 g, 16 mmol, 4 equiv.). The reaction was heated to 85 °C and allowed to continue at that temperature for 3 days. The reaction was then allowed to cool to room temperature, and it was diluted with Et<sub>2</sub>O and 10% aqueous LiCl. The aqueous layer was removed, and the organic layer was washed 3x with 10% aqueous LiCl, dried over MgSO<sub>4</sub>, filtered, concentrated, and purified by flash column chromatography to yield oxetane **1i** (601 mg, 2.48 mmol, 62% yield). <sup>1</sup>H NMR (600 MHz, CDCl<sub>3</sub>) δ 7.31 – 7.26 (m, 2H), 6.99 (td, *J* = 7.4, 1.1 Hz, 1H), 6.73 – 6.68 (m, 2H), 5.24 – 5.18 (m, 1H), 4.97 (ddd, *J* = 7.1, 6.2, 1.0 Hz, 2H), 4.80 – 4.75 (m, 2H) ppm; <sup>13</sup>C NMR (126 MHz, CDCl<sub>3</sub>) δ 156.7, 129.8, 121.6, 114.6, 78.2, 70.1 ppm; FT-IR (thin-film): 3042, 2948, 2874, 1599, 1587, 1489, 1372, 1291, 1235, 1174, 1124, 1090, 1077, 1038, 1025, 972, 879, 811, 751, 690, 587, 512, 474 cm<sup>-1</sup>; HRMS (FTMS + p EI) calculated for C<sub>9</sub>H<sub>10</sub>O<sub>2</sub> • [M•]<sup>+</sup> 150.0675, found 150.0674.

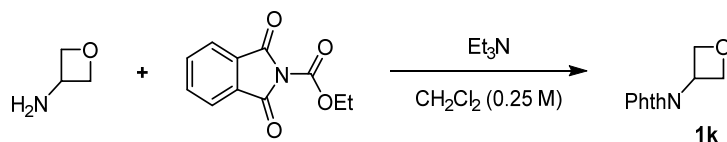

**2-(oxetan-3-yl)isoindoline-1,3-dione (1k):** Oxetan-3-amine (0.35 mL, 5 mmol, 1 equiv.) was dissolved in CH<sub>2</sub>Cl<sub>2</sub> (20 mL, 0.25 M) and cooled to 0 °C. Triethylamine (0.70 mL, 5 mmol, 1 equiv.) was added followed by Nefkens' reagent (1.10 g, 5 mmol, 1 equiv.). The ice-bath was then removed and the reaction was allowed to continue stirring under nitrogen. After 48 hours, the reaction diluted with CH<sub>2</sub>Cl<sub>2</sub>, and the organic layer was washed sequentially with 1 M aqueous HCl, saturated aqueous NaHCO<sub>3</sub>, and brine. The organic layer was then dried over MgSO<sub>4</sub>, filtered, concentrated under vacuum, and purified by flash column chromatography to yield oxetane **1k** (521 mg, 2.56 mmol, 51% yield). <sup>1</sup>H NMR (500 MHz, CDCl<sub>3</sub>) δ 7.89 – 7.85 (m, 2H), 7.77 – 7.73 (m, 2H), 5.42 – 5.34 (m, 1H), 5.34 – 5.29 (m, 2H), 4.93 – 4.89 (m, 2H) ppm; <sup>13</sup>C NMR (126 MHz, CDCl<sub>3</sub>) δ 167.9, 134.4, 131.8, 123.6, 75.3, 44.3 ppm; FT-IR (thin-film): 2964, 2898, 1772, 1705, 1486, 1466, 1389, 1046, 969, 884, 724, 531 cm<sup>-1</sup>; HRMS (ESI-TOF) calculated for C<sub>11</sub>H<sub>9</sub>NO<sub>3</sub> [M+H]<sup>+</sup> 204.0655, found 204.0654.

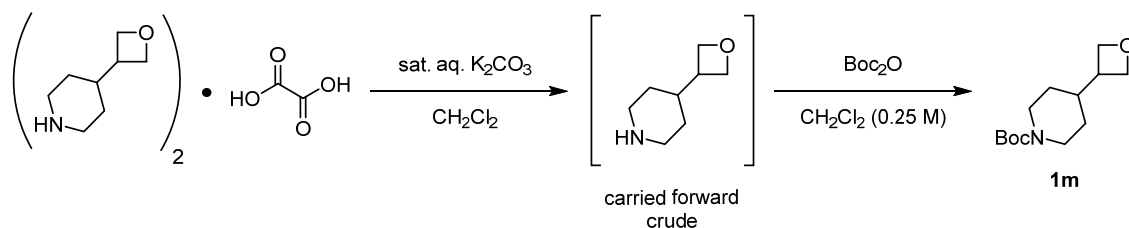

**tert-butyl 4-(oxetan-3-yl)piperidine-1-carboxylate (1m):** 4-(oxetan-3-yl)piperidine hemioxalate (125 mg, 0.336 mmol, 0.5 equiv.) was dissolved in CH<sub>2</sub>Cl<sub>2</sub> and free-based with saturated aqueous potassium carbonate in a separatory funnel. The organic layer was removed, and the aqueous layer was extracted 5x with CH<sub>2</sub>Cl<sub>2</sub>. The combined organic layers were dried over Na<sub>2</sub>SO<sub>4</sub>, filtered, concentrated, and carried forward crude assuming complete conversion to two equivalents of 4-(oxetan-3-yl)piperidine. The free amine was then re-dissolved in CH<sub>2</sub>Cl<sub>2</sub> (1.3 mL, 0.25 M) and then Boc<sub>2</sub>O (165 mg, 0.755 mmol, 1.125 equiv.) was added. The reaction was allowed to continue stirring overnight under an atmosphere of nitrogen. The following day, the reaction was concentrated and purified by flash column

chromatography to yield oxetane **1m** (155 mg, 0.642 mmol, 96% yield). **<sup>1</sup>H NMR** (600 MHz, CDCl<sub>3</sub>) δ 4.75 (dd, *J* = 7.9, 6.1 Hz, 2H), 4.46 (t, *J* = 6.2 Hz, 2H), 4.31 – 3.85 (br, 2H), 2.77 – 2.62 (m, 3H), 1.86 – 1.75 (m, 1H), 1.61 – 1.53 (m, 2H), 1.45 (s, 9H), 1.00 (qd, *J* = 12.4, 4.5 Hz, 2H) ppm; **<sup>13</sup>C NMR** (126 MHz, CDCl<sub>3</sub>) δ 154.9, 79.5, 75.8, 44.8 – 42.5 (br), 40.3, 40.0, 28.9, 28.5 ppm; **FT-IR** (thin-film): 2972, 2931, 2860, 1685, 1447, 1414, 1364, 1276, 1235, 1158, 1093, 1018, 978, 883, 811, 771 cm<sup>-1</sup>; **HRMS** (ESI-TOF) calculated for C<sub>13</sub>H<sub>23</sub>NO<sub>3</sub>Na [M+Na]<sup>+</sup> 264.1570, found 264.1567.

## Reaction Scope and Derivatizations

### General procedures for preparative-scale squaramide catalyzed oxetane opening:

General Procedures B and C differ only in the reaction workup and purification. Oxetanes **1f**, **1k**, **1m**, **1u**, and **1v** required deviations from these procedures. General Procedure D, which has both elevated temperatures and higher catalyst loadings, was used for tertiary alcohol derivatives **1q-t** due to their reduced reactivity.

**General Procedure B (reaction with purification by silica plug):** An oven-dried 2-dram vial was equipped with a magnetic stir-bar and closed with a screw-cap containing a rubber septum. The vial was charged with oxetane (0.4 mmol, 1 equiv.), squaramide **3a** (5.4 mg, 0.008 mmol, 0.02 equiv.), and *t*-BuOMe (4 mL, 0.1 M). The headspace of the vial was flushed with nitrogen for 15 seconds and then the vial was cooled to -78 °C in a dry ice-acetone bath, allowing 15 minutes for the temperature to equilibrate. A micro-syringe was flushed with TMSBr 3x or until the solution in the syringe was clear, and then TMSBr (106  $\mu$ L, 0.8 mmol, 2 equiv.) was added dropwise to the reaction being careful to ensure no TMSBr froze to the side of the vial. The reaction was allowed to continue stirring at -78 °C for 24 hours, after which it was quenched by the addition of a 1:1 solution of *i*-PrOH-Et<sub>3</sub>N (0.4 mL). After an additional 5 minutes at -78 °C, the reaction diluted with 2 mL of hexanes. The crude mixture was run through a 2-inch silica plug topped with 4 mL of hexanes using an additional 20 mL of a 30% solution of Et<sub>2</sub>O in hexanes to rinse the plug. The filtrate from the plug was concentrated under vacuum to yield the product, generally requiring no further purification. When possible, e.e. was determined by chiral GC using the TMS-protected product. Otherwise, a pipette-tip of the product was dissolved in Et<sub>2</sub>O (1 mL) and aqueous 1 M HCl was added (1 mL). The resulting biphasic solution was stirred vigorously for ~30 minutes to deprotect the silyl ether, and then the organic layer was removed, dried over Na<sub>2</sub>SO<sub>4</sub>, filtered, concentrated under vacuum, and analyzed by chiral HPLC.

**General Procedure C (reaction with aqueous workup and column chromatography):** An oven-dried 2-dram vial was equipped with a magnetic stir-bar and closed with a screw-cap containing a rubber septum. The vial was charged with oxetane (0.4 mmol, 1 equiv.), squaramide **3a** (5.4 mg, 0.008 mmol, 0.02 equiv.), and *t*-BuOMe (4 mL, 0.1 M). The headspace of the vial was flushed with nitrogen for 15 seconds and then the vial was cooled to -78 °C in a dry ice-acetone bath, allowing 15 minutes for the temperature to equilibrate. A micro-syringe was flushed with TMSBr 3x or until the solution in the syringe was clear, and then TMSBr (106  $\mu$ L, 0.8 mmol, 2 equiv.) was added dropwise to the reaction being careful to ensure no TMSBr froze to the side of the vial. The reaction was allowed to continue stirring at -78 °C for 24 hours, after which it was quenched by the addition of a 1:1 solution of *i*-PrOH-Et<sub>3</sub>N (0.4 mL). After an additional 5 minutes at -78 °C, the reaction was diluted with Et<sub>2</sub>O and saturated aqueous NaHCO<sub>3</sub>. The organic layer was removed, and the aqueous layer was extracted 3x with Et<sub>2</sub>O. The combined organic layers were washed with brine, dried briefly (~10 minutes) over MgSO<sub>4</sub>, filtered, concentrated under vacuum, and purified by flash column chromatography to yield the product. To determine the e.e., a pipette-tip of the product was dissolved in Et<sub>2</sub>O (1 mL) and aqueous 1 M HCl was added (1 mL). The resulting biphasic solution was stirred vigorously for ~30 minutes to deprotect the silyl ether, and then the organic layer was removed, dried over Na<sub>2</sub>SO<sub>4</sub>, filtered, concentrated under vacuum, and analyzed by chiral HPLC.

**General Procedure D (reaction of 3-(benzyloxy)-3-aryloxetanes):** An oven-dried 2-dram vial was equipped with a magnetic stir-bar and closed with a screw-cap containing a rubber septum. The vial was charged with oxetane (0.4 mmol, 1 equiv.), squaramide **3a** (20.4 mg, 0.030 mmol, 0.075 equiv.), and *t*-BuOMe (4 mL, 0.1 M). The headspace of the vial was flushed with nitrogen for 15 seconds and then the vial was cooled to -78 °C in a dry ice-acetone bath, allowing 15 minutes for the temperature to equilibrate. A micro-syringe was flushed with TMSBr 3x or until the solution in the syringe was clear, and then TMSBr (106  $\mu$ L, 0.8 mmol, 2 equiv.) was added dropwise to the reaction being careful to ensure no TMSBr froze to the side of the vial. The reaction was allowed to continue stirring at -78 °C for 1 hour after which it was transferred to a -25 °C cryocool and allowed to continue for an additional 71 hours. The reaction was then quenched by the addition of a 1:1 solution of *i*-PrOH-Et<sub>3</sub>N (0.4 mL). After an additional 5 minutes at -25 °C, the reaction was diluted with 2 mL of hexanes. The crude mixture was run through a 2-inch silica plug topped with 4 mL of hexanes using an additional 20 mL of 30% ether in hexanes as a rinse. The filtrate from the plug was concentrated under vacuum and purified by flash column chromatography to yield the desired product. To determine the e.e., a pipette-tip of the product was dissolved in Et<sub>2</sub>O (1 mL) and aqueous 3 M HCl was added (1 mL). The resulting biphasic solution was stirred vigorously for ~30 minutes to deprotect the silyl ether, and then the organic layer was removed, dried over Na<sub>2</sub>SO<sub>4</sub>, filtered, concentrated under vacuum, and analyzed by chiral HPLC.

**Characterization data for products:**

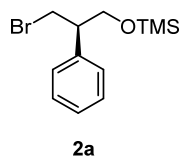

**(R)-(3-bromo-2-phenylpropoxy)trimethylsilane (2a):** Oxetane **1a** (53.7 mg, 0.4 mmol, 1 equiv.) underwent reaction according to General Procedure B to yield **2a** (111.0 mg, 0.386 mmol, 97% yield). **2a** was determined to be of 98% e.e. by chiral GC analysis (CP-Chirasil-Dex CB – 25m x 0.25 mm x 0.25  $\mu$ m, 125  $^{\circ}$ C for 25 minutes, 125 $\rightarrow$ 150  $^{\circ}$ C at 1 $^{\circ}$ /min, 150 $\rightarrow$ 200  $^{\circ}$ C at 5 $^{\circ}$ /min, 7 psi,  $t_r$ (major)= 24.3 min,  $t_r$ (minor)= 23.9 min). The absolute configuration of this compound was assigned by X-ray crystallographic analysis of its triazole derivative **26a** (see below).  $^1\text{H NMR}$  (600 MHz,  $\text{CDCl}_3$ )  $\delta$  7.35 – 7.30 (m, 2H), 7.29 – 7.25 (m, 1H), 7.24 – 7.21 (m, 2H), 3.90 – 3.82 (m, 2H), 3.79 (dd,  $J$  = 10.3, 7.0 Hz, 1H), 3.64 (dd,  $J$  = 10.0, 7.3 Hz, 1H), 3.14 (qd,  $J$  = 6.9, 5.0 Hz, 1H), 0.08 (s, 9H) ppm;  $^{13}\text{C NMR}$  (126 MHz,  $\text{CDCl}_3$ )  $\delta$  140.4, 128.6, 128.1, 127.4, 64.8, 50.2, 35.1, –0.5 ppm; **FT-IR** (thin-film): 2957, 2903, 2868, 1495, 1453, 1382, 1251, 1098, 872, 841, 753, 699, 533  $\text{cm}^{-1}$ ; **HRMS** (FTMS + p CI) calculated for  $\text{C}_{12}\text{H}_{19}\text{BrOSi}$   $[\text{M}+\text{H}]^+$  287.0461, found 287.0464;  $[\alpha]_D = -38.0^{\circ}$  ( $c$  = 1.0,  $\text{CHCl}_3$ ).

**Racemic sample:** GC (CP-Chirasil-Dex CB – 25m x 0.25 mm x 0.25  $\mu$ m, 125  $^{\circ}$ C for 25 minutes, 125 $\rightarrow$ 150  $^{\circ}$ C at 1 $^{\circ}$ /min, 150 $\rightarrow$ 200  $^{\circ}$ C at 5 $^{\circ}$ /min, 7 psi)

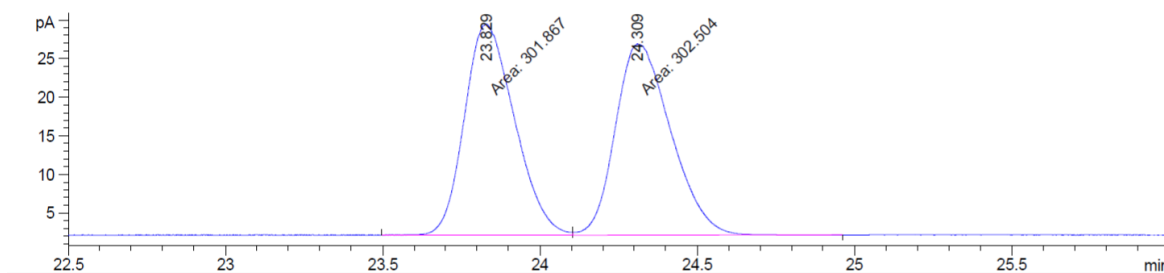

Signal 2: FID2 B, Back Signal

| Peak # | RetTime [min] | Type | Width [min] | Area [pA*s] | Height [pA] | Area %   |
|--------|---------------|------|-------------|-------------|-------------|----------|
| 1      | 23.829        | MF   | 0.1839      | 301.86725   | 27.35132    | 49.94733 |
| 2      | 24.309        | FM   | 0.2037      | 302.50391   | 24.74771    | 50.05267 |

**Enantioenriched sample:** GC (CP-Chirasil-Dex CB – 25m x 0.25 mm x 0.25  $\mu$ m, 125  $^{\circ}$ C for 25 minutes, 125 $\rightarrow$ 150  $^{\circ}$ C at 1 $^{\circ}$ /min, 150 $\rightarrow$ 200  $^{\circ}$ C at 5 $^{\circ}$ /min, 7 psi), 98% e.e.

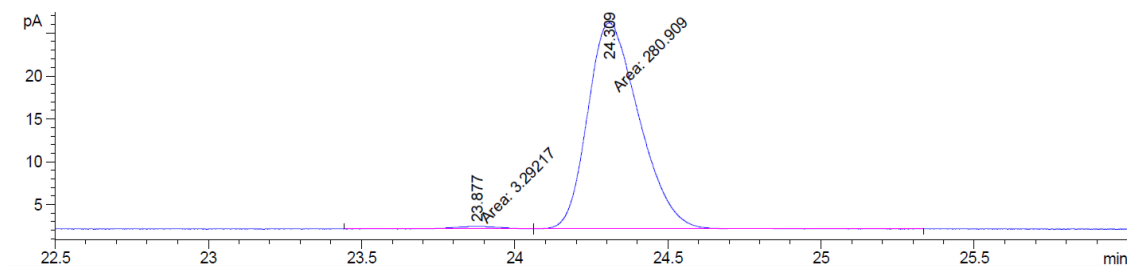

Signal 2: FID2 B, Back Signal

| Peak # | RetTime [min] | Type | Width [min] | Area [pA*s] | Height [pA] | Area %   |
|--------|---------------|------|-------------|-------------|-------------|----------|
| 1      | 23.877        | MF   | 0.1787      | 3.29217     | 3.07066e-1  | 1.15839  |
| 2      | 24.309        | FM   | 0.1943      | 280.90942   | 24.10074    | 98.84161 |

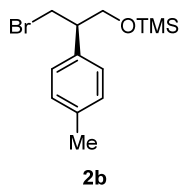

**(R)-3-bromo-2-(p-tolyl)propoxytrimethylsilane (2b):** Oxetane **1b** (59.3 mg, 0.4 mmol, 1 equiv.) underwent reaction according to General Procedure B to yield **2b** (121.0 mg, 0.40 mmol, 100% yield). **2b** was determined to be of 92% e.e. by chiral HPLC analysis of the deprotected alcohol (ChiralPak IB, 2% *i*-PrOH in hexanes, 1 mL/min,  $t_r(\text{major})=23.4$  min,  $t_r(\text{minor})=25.7$  min). The absolute configuration of **2b** was assigned by analogy to **2a**. **<sup>1</sup>H NMR** (600 MHz, CDCl<sub>3</sub>)  $\delta$  7.16 – 7.09 (m, 4H), 3.87 – 3.81 (m, 2H), 3.77 (dd,  $J=10.3, 7.2$  Hz, 1H), 3.62 (dd,  $J=9.9, 7.4$  Hz, 1H), 3.14 – 3.08 (m, 1H), 2.33 (s, 3H), 0.09 (s, 9H) ppm; **<sup>13</sup>C NMR** (126 MHz, CDCl<sub>3</sub>)  $\delta$  137.3, 136.9, 129.3, 127.9, 64.8, 49.8, 35.3, 21.2, -0.5 ppm; **FT-IR** (thin-film): 2956, 2921, 2867, 1515, 1434, 1381, 1250, 1092, 926, 868, 837, 813, 747, 537 cm<sup>-1</sup>; **HRMS** (FTMS + p CI) calculated for C<sub>13</sub>H<sub>20</sub>BrOSi [M-H]<sup>+</sup> 299.0461, found 299.0461;  $[\alpha]_D = -37.6^\circ$  (c = 1.0, CHCl<sub>3</sub>).

**Racemic sample:** HPLC (ChiralPak IB, 2% *i*-PrOH in hexanes, 1 mL/min, 210 nm)

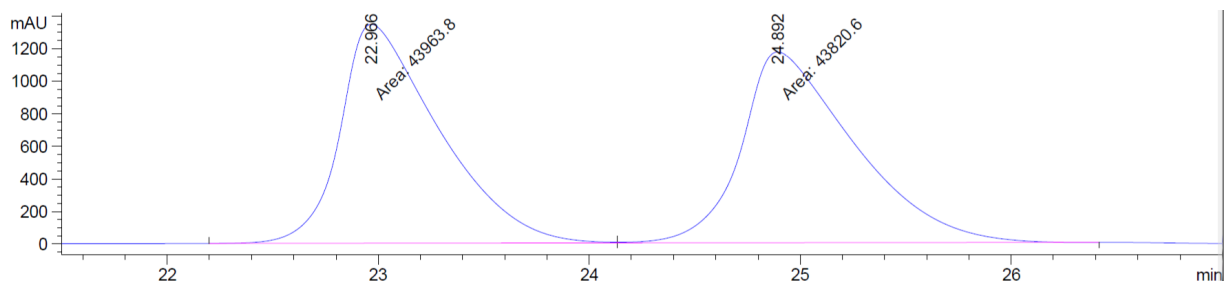

Signal 3: DAD1 C, Sig=210,4 Ref=450,100

| Peak # | RetTime [min] | Type | Width [min] | Area [mAU*s] | Height [mAU] | Area %  |
|--------|---------------|------|-------------|--------------|--------------|---------|
| 1      | 22.966        | MF   | 0.5442      | 4.39638e4    | 1346.48755   | 50.0816 |
| 2      | 24.892        | FM   | 0.6224      | 4.38206e4    | 1173.37927   | 49.9184 |

**Enantioenriched sample:** HPLC (ChiralPak IB, 2% *i*-PrOH in hexanes, 1 mL/min, 210 nm), 92% e.e.

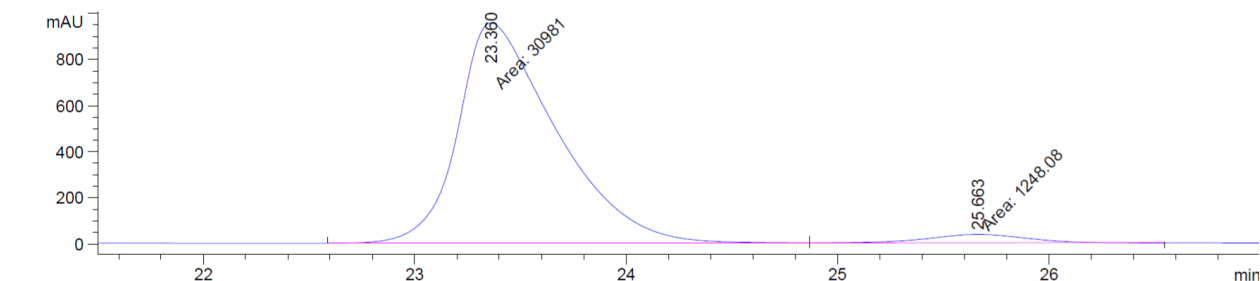

Signal 3: DAD1 C, Sig=210,4 Ref=450,100

| Peak # | RetTime [min] | Type | Width [min] | Area [mAU*s] | Height [mAU] | Area %  |
|--------|---------------|------|-------------|--------------|--------------|---------|
| 1      | 23.360        | MF   | 0.5396      | 3.09810e4    | 956.91705    | 96.1275 |
| 2      | 25.663        | FM   | 0.5566      | 1248.08240   | 37.37446     | 3.8725  |

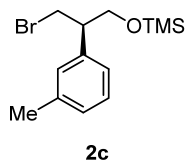

**(R)-(3-bromo-2-(m-tolyl)propoxy)trimethylsilane (2c):** Oxetane **1c** (59.3 mg, 0.4 mmol, 1 equiv.) underwent reaction according to General Procedure B to yield **2c** (117 mg, 0.39 mmol, 97% yield). **2c** was determined to be of 98% e.e. by chiral HPLC analysis of the deprotected alcohol (ChiralPak IB, 5% *i*-PrOH in hexanes, 1 mL/min,  $t_r(\text{major})=14.2$  min,  $t_r(\text{minor})=15.3$  min). The absolute configuration of **2c** was assigned by analogy to **2a**. **<sup>1</sup>H NMR** (600 MHz, CDCl<sub>3</sub>)  $\delta$  7.23 – 7.20 (m, 1H), 7.10 – 7.07 (m, 1H), 7.04 – 7.01 (m, 2H), 3.88 – 3.82 (m, 2H), 3.77 (dd,  $J=10.3, 7.2$  Hz, 1H), 3.62 (dd,  $J=9.9, 7.4$  Hz, 1H), 3.11 (qd,  $J=7.1, 5.1$  Hz, 1H), 2.35 (s, 3H), 0.08 (s, 9H) ppm; **<sup>13</sup>C NMR** (126 MHz, CDCl<sub>3</sub>)  $\delta$  140.2, 138.1, 128.9, 128.4, 128.1, 125.1, 64.8, 50.2, 35.1, 21.6, -0.4 ppm; **FT-IR** (thin-film): 3024, 2956, 2919, 2867, 1608, 1490, 1434, 1381, 1250, 1091, 944, 867, 837, 785, 747, 702, 444 cm<sup>-1</sup>; **HRMS** (FTMS + p CI) calculated for C<sub>13</sub>H<sub>20</sub>BrOSi [M-H]<sup>+</sup> 299.0461, found 299.0461;  $[\alpha]_D = -36.4^\circ$  (c = 1.0, CHCl<sub>3</sub>).

**Racemic sample:** HPLC (ChiralPak IB, 5% *i*-PrOH in hexanes, 1 mL/min, 210 nm)

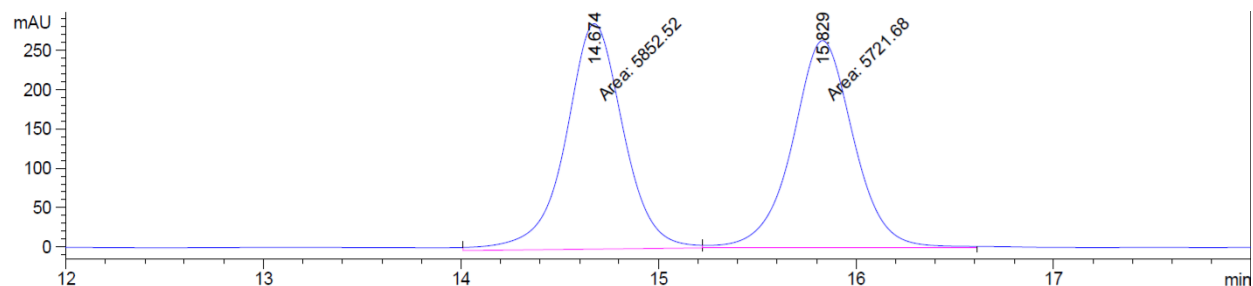

Signal 3: DAD1 C, Sig=210,4 Ref=450,100

| Peak # | RetTime [min] | Type | Width [min] | Area [mAU*s] | Height [mAU] | Area %  |
|--------|---------------|------|-------------|--------------|--------------|---------|
| 1      | 14.674        | MM   | 0.3405      | 5852.52148   | 286.46936    | 50.5652 |
| 2      | 15.829        | MM   | 0.3620      | 5721.67627   | 263.42648    | 49.4348 |

**Enantioenriched sample:** HPLC (ChiralPak IB, 5% *i*-PrOH in hexanes, 1 mL/min, 210 nm), 98% e.e.

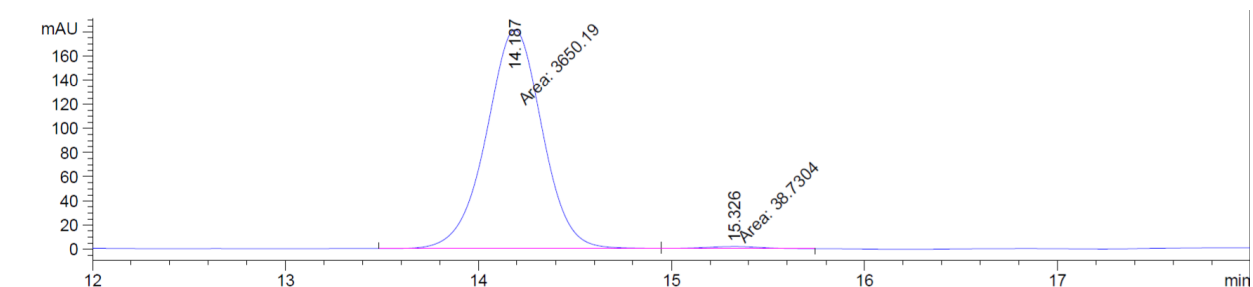

Signal 3: DAD1 C, Sig=210,4 Ref=450,100

| Peak # | RetTime [min] | Type | Width [min] | Area [mAU*s] | Height [mAU] | Area %  |
|--------|---------------|------|-------------|--------------|--------------|---------|
| 1      | 14.187        | MF   | 0.3358      | 3650.18579   | 181.18057    | 98.9501 |
| 2      | 15.326        | FM   | 0.3473      | 38.73040     | 1.85851      | 1.0499  |

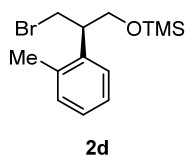

**(R)-3-bromo-2-(o-tolyl)propoxytrimethylsilane (2d):** Oxetane **1d** (59.3 mg, 0.4 mmol, 1 equiv.) underwent reaction according to General Procedure B, but due to incomplete conversion, it was necessary to purify the crude product by flash column chromatography to yield **2d** (87.4 mg, 0.29 mmol, 72% yield). **2d** was determined to be of 73% e.e. by chiral HPLC analysis of the deprotected alcohol (ChiralCel OD-H, 3% *i*-PrOH in hexanes, 1 mL/min,  $t_r$ (major)= 33.3 min,  $t_r$ (minor)= 31.1 min). The absolute configuration of **2d** was assigned by analogy to **2a**. <sup>1</sup>H NMR (600 MHz, CDCl<sub>3</sub>) δ 7.21 – 7.14 (m, 4H), 3.88 (dd,  $J$  = 9.9, 6.1 Hz, 1H), 3.81 (dd,  $J$  = 10.3, 5.0 Hz, 1H), 3.76 (dd,  $J$  = 10.3, 7.2 Hz, 1H), 3.61 (dd,  $J$  = 9.9, 7.6 Hz, 1H), 3.47 (tdd,  $J$  = 7.4, 6.1, 5.0 Hz, 1H), 2.36 (s, 3H), 0.08 (s, 9H) ppm; <sup>13</sup>C NMR (126 MHz, CDCl<sub>3</sub>) δ 138.6, 136.5, 130.6, 127.1, 126.3, 126.2, 64.6, 45.3, 34.8, 19.9, -0.5 ppm; FT-IR (thin-film): 3022, 2955, 2901, 2867, 1492, 1462, 1250, 1092, 999, 944, 925, 869, 838, 748, 723, 657, 455 cm<sup>-1</sup>; HRMS (FTMS + p CI) calculated for C<sub>13</sub>H<sub>20</sub>BrOSi [M-H]<sup>+</sup> 299.0461, found 299.0461; [α]<sub>D</sub> = -29.6° (c = 1.0, CHCl<sub>3</sub>).

**Racemic sample:** HPLC (ChiralCel OD-H, 3% *i*-PrOH in hexanes, 1 mL/min, 210 nm)

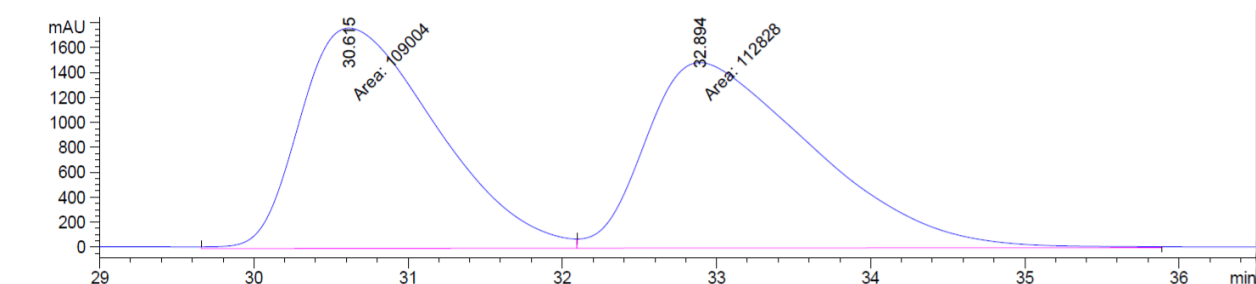

Signal 3: DAD1 C, Sig=210,4 Ref=450,100

| Peak # | RetTime [min] | Type | Width [min] | Area [mAU*s] | Height [mAU] | Area %  |
|--------|---------------|------|-------------|--------------|--------------|---------|
| 1      | 30.615        | MF   | 1.0279      | 1.09004e5    | 1767.40015   | 49.1381 |
| 2      | 32.894        | FM   | 1.2637      | 1.12828e5    | 1488.02905   | 50.8619 |

**Enantioenriched sample:** HPLC (ChiralCel OD-H, 3% *i*-PrOH in hexanes, 1 mL/min, 210 nm), 73% e.e.

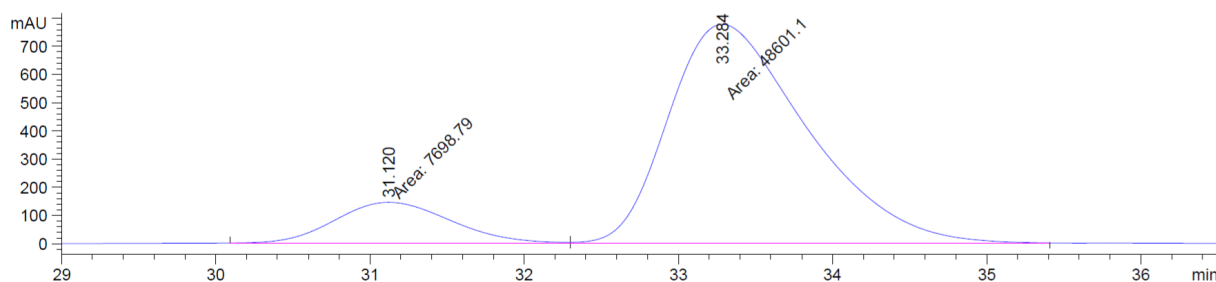

Signal 3: DAD1 C, Sig=210,4 Ref=450,100

| Peak # | RetTime [min] | Type | Width [min] | Area [mAU*s] | Height [mAU] | Area %  |
|--------|---------------|------|-------------|--------------|--------------|---------|
| 1      | 31.120        | MF   | 0.8785      | 7698.79053   | 146.05885    | 13.6746 |
| 2      | 33.284        | FM   | 1.0412      | 4.86011e4    | 777.95697    | 86.3254 |



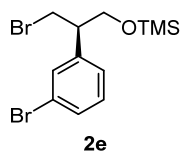

**(R)-3-bromo-2-(3-bromophenyl)propoxytrimethylsilane (2e):** Oxetane **1e** (85 mg, 0.4 mmol, 1 equiv.) underwent reaction according to General Procedure B to yield **2e** (141 mg of a 12.5 : 1 mixture of silylated : desilylated product, 0.39 mmol combined, 98% yield of combined silylated and desilylated products). **2e** was determined to be of 98% e.e. by chiral HPLC analysis of the deprotected alcohol (ChiralPak IB, 3% *i*-PrOH in hexanes, 1 mL/min,  $t_r(\text{major})=20.2$  min,  $t_r(\text{minor})=22.3$  min). The absolute configuration of **2e** was assigned by analogy to **2a**. <sup>1</sup>H NMR (600 MHz, CDCl<sub>3</sub>)  $\delta$  7.42 – 7.37 (m, 2H), 7.20 (t,  $J=7.7$  Hz, 1H), 7.16 (dt,  $J=7.7, 1.5$  Hz, 1H), 3.87 (dd,  $J=10.3, 4.9$  Hz, 1H), 3.82 – 3.75 (m, 2H), 3.59 (dd,  $J=10.1, 7.2$  Hz, 1H), 3.10 (qd,  $J=6.6, 4.8$  Hz, 1H), 0.08 (s, 9H) ppm; <sup>13</sup>C NMR (126 MHz, CDCl<sub>3</sub>)  $\delta$  142.8, 131.2, 130.4, 130.1, 126.9, 122.6, 64.4, 49.8, 34.3, -0.5 ppm; FT-IR (thin-film): 2957, 2906, 2870, 1595, 1567, 1477, 1428, 1381, 1251, 1098, 997, 942, 867, 841, 782, 749, 694, 657, 439 cm<sup>-1</sup>; HRMS (FTMS + p CI) calculated for C<sub>12</sub>H<sub>17</sub>Br<sub>2</sub>OSi [M-H]<sup>+</sup> 362.9410, found 362.9408; [ $\alpha$ ]<sub>D</sub> = -33° (c = 1.0, CHCl<sub>3</sub>).

**Racemic sample:** HPLC (ChiralPak IB, 3% *i*-PrOH in hexanes, 1 mL/min, 210 nm)

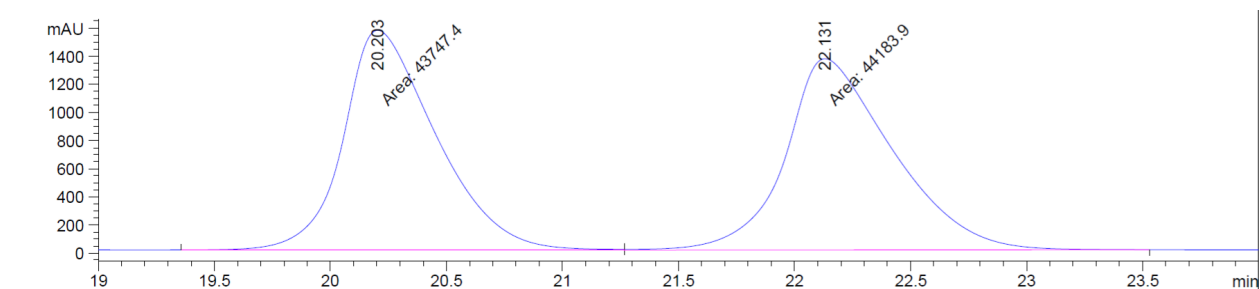

Signal 3: DAD1 C, Sig=210,4 Ref=450,100

| Peak # | RetTime [min] | Type | Width [min] | Area [mAU*s] | Height [mAU] | Area %  |
|--------|---------------|------|-------------|--------------|--------------|---------|
| 1      | 20.203        | MF   | 0.4657      | 4.37474e4    | 1565.55688   | 49.7517 |
| 2      | 22.131        | FM   | 0.5404      | 4.41839e4    | 1362.67834   | 50.2483 |

**Enantioenriched sample:** HPLC (ChiralPak IB, 3% *i*-PrOH in hexanes, 1 mL/min, 210 nm), 98% e.e.

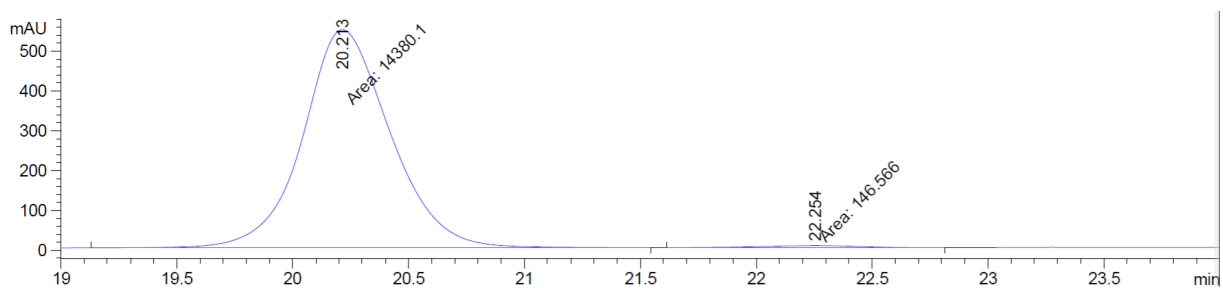

Signal 3: DAD1 C, Sig=210,4 Ref=450,100

| Peak # | RetTime [min] | Type | Width [min] | Area [mAU*s] | Height [mAU] | Area %  |
|--------|---------------|------|-------------|--------------|--------------|---------|
| 1      | 20.213        | MM   | 0.4377      | 1.43801e4    | 547.58612    | 98.9911 |
| 2      | 22.254        | MM   | 0.4780      | 146.56618    | 5.11043      | 1.0089  |

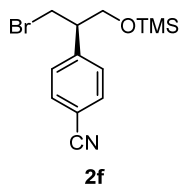

**(R)-4-(1-bromo-3-((trimethylsilyloxy)propan-2-yl)benzonitrile (2f):** Oxetane **1f** (63.7 mg, 0.4 mmol, 1 equiv.) underwent reaction according to General Procedure C with the following modification: the reaction was run for 48 hours. The reaction yielded **2f** (112.8 mg, 0.36 mmol, 90% yield). **2f** was determined to be of 98% e.e. by chiral HPLC analysis of the deprotected alcohol (ChiralPak AD-H, 5% *i*-PrOH in hexanes, 1 mL/min,  $t_r(\text{major})=58.5$  min,  $t_r(\text{minor})=54.2$  min). The absolute configuration of **2f** was assigned by analogy to **2a**. <sup>1</sup>H NMR (600 MHz, CDCl<sub>3</sub>)  $\delta$  7.64 – 7.61 (m, 2H), 7.37 – 7.34 (m, 2H), 3.89 (dd,  $J = 10.3, 4.9$  Hz, 1H), 3.82 – 3.76 (m, 2H), 3.61 (dd,  $J = 10.2, 7.3$  Hz, 1H), 3.22 – 3.17 (m, 1H), 0.07 (s, 9H) ppm; <sup>13</sup>C NMR (126 MHz, CDCl<sub>3</sub>)  $\delta$  145.9, 132.2, 129.0, 118.8, 111.2, 64.1, 50.1, 33.6, -0.6 ppm; FT-IR (thin-film): 2957, 2901, 2871, 2229, 1609, 1506, 1252, 1099, 871, 841, 749, 564 cm<sup>-1</sup>; HRMS (ESI-TOF) calculated for C<sub>13</sub>H<sub>19</sub>BrNOSi [M+H]<sup>+</sup> 312.0414, found 312.0404; [ $\alpha$ ]<sub>D</sub> = -36.8° (c = 1.0, CHCl<sub>3</sub>).

**Racemic sample:** HPLC (ChiralPak AD-H, 5% *i*-PrOH in hexanes, 1 mL/min, 230 nm)

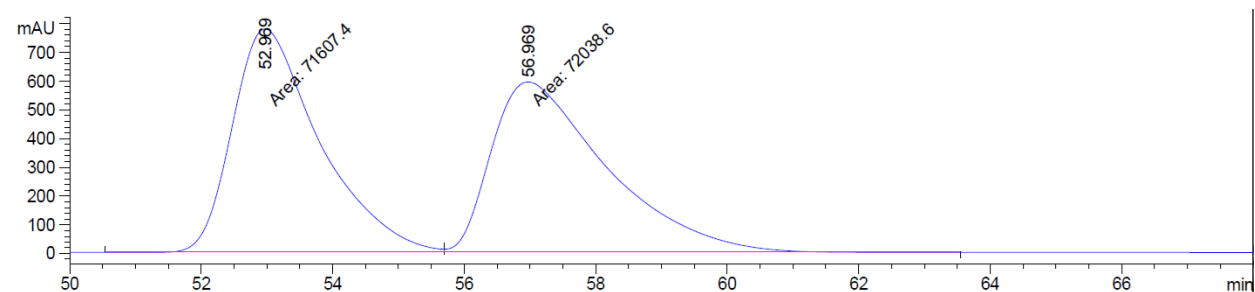

Signal 2: DAD1 B, Sig=230,4 Ref=450,100

| Peak # | RetTime [min] | Type | Width [min] | Area [mAU*s] | Height [mAU] | Area %  |
|--------|---------------|------|-------------|--------------|--------------|---------|
| 1      | 52.969        | MF   | 1.5344      | 7.16074e4    | 777.78027    | 49.8499 |
| 2      | 56.969        | FM   | 2.0242      | 7.20386e4    | 593.14807    | 50.1501 |

**Enantioenriched sample:** HPLC (ChiralPak AD-H, 5% *i*-PrOH in hexanes, 1 mL/min, 230 nm), 98% e.e.

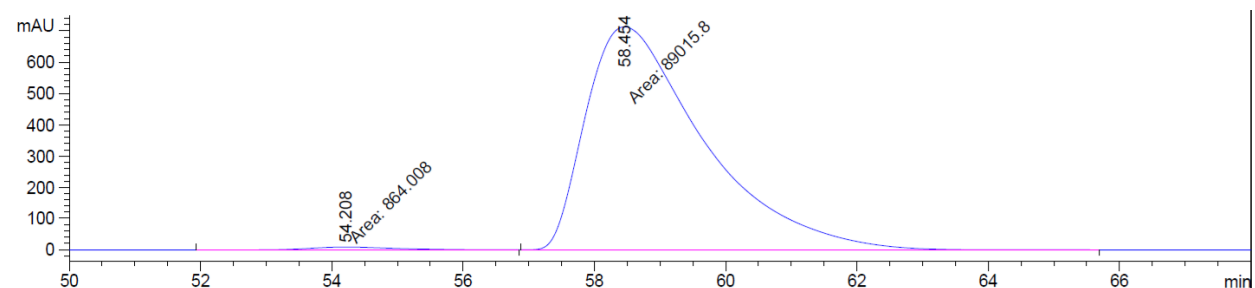

Signal 2: DAD1 B, Sig=230,4 Ref=450,100

| Peak # | RetTime [min] | Type | Width [min] | Area [mAU*s] | Height [mAU] | Area %  |
|--------|---------------|------|-------------|--------------|--------------|---------|
| 1      | 54.208        | MM   | 1.5577      | 864.00775    | 9.24429      | 0.9613  |
| 2      | 58.454        | MM   | 2.0777      | 8.90157e4    | 714.05865    | 99.0387 |

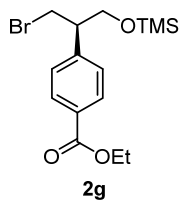

**ethyl (R)-4-(1-bromo-3-((trimethylsilyloxy)propan-2-yl)benzoate (2g):** Oxetane **1g** (82 mg, 0.4 mmol, 1 equiv.) underwent reaction according to General Procedure B to yield **2g** (136 mg, 0.38 mmol, 95% yield). **2g** was determined to be of 96% e.e. by chiral HPLC analysis of the desilylated alcohol (ChiralPak IB, 5% *i*-PrOH in hexanes, 1 mL/min,  $t_r$ (major)= 18.6 min,  $t_r$ (minor)= 17.0 min). The absolute configuration of **2g** was assigned by analogy to **2a**. **<sup>1</sup>H NMR** (600 MHz, CDCl<sub>3</sub>) δ 8.02 – 7.99 (m, 2H), 7.32 – 7.28 (m, 2H), 4.37 (q,  $J$  = 7.1 Hz, 2H), 3.89 (dd,  $J$  = 10.2, 5.0 Hz, 1H), 3.85 – 3.78 (m, 2H), 3.63 (dd,  $J$  = 10.1, 7.3 Hz, 1H), 3.20 (qd,  $J$  = 6.6, 4.9 Hz, 1H), 1.39 (t,  $J$  = 7.1 Hz, 3H), 0.07 (s, 9H) ppm; **<sup>13</sup>C NMR** (126 MHz, CDCl<sub>3</sub>) δ 166.5, 145.5, 129.8, 129.6, 128.1, 64.4, 61.0, 50.1, 34.2, 14.4, -0.6 ppm; **FT-IR** (thin-film): 2957, 2905, 2870, 1716, 1611, 1367, 1275, 1251, 1182, 1101, 1022, 870, 841, 749, 707, 537 cm<sup>-1</sup>; **HRMS** (FTMS + p CI) calculated for C<sub>15</sub>H<sub>24</sub>BrO<sub>3</sub>Si [M+H]<sup>+</sup> 359.0673, found 359.0672; [α]<sub>D</sub> = -27.8° (c = 1.0, CHCl<sub>3</sub>).

**Racemic sample:** HPLC (ChiralPak IB, 5% *i*-PrOH in hexanes, 1 mL/min, 230 nm)

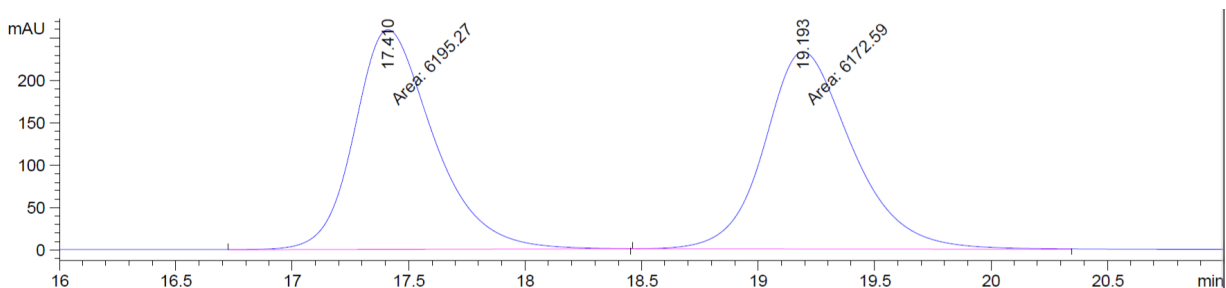

Signal 2: DAD1 B, Sig=230,4 Ref=450,100

| Peak # | RetTime [min] | Type | Width [min] | Area [mAU*s] | Height [mAU] | Area %  |
|--------|---------------|------|-------------|--------------|--------------|---------|
| 1      | 17.410        | MM   | 0.3977      | 6195.27441   | 259.61163    | 50.0917 |
| 2      | 19.193        | MM   | 0.4417      | 6172.59277   | 232.93501    | 49.9083 |

**Enantioenriched sample:** HPLC (ChiralPak IB, 5% *i*-PrOH in hexanes, 1 mL/min, 230 nm), 96% e.e.

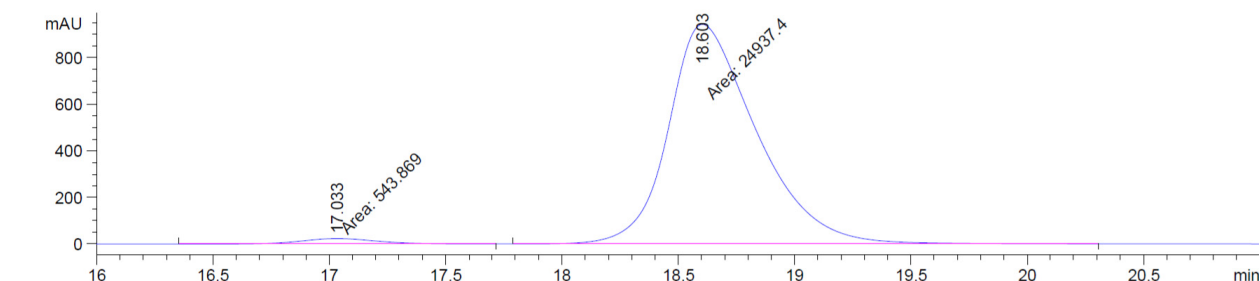

Signal 2: DAD1 B, Sig=230,4 Ref=450,100

| Peak # | RetTime [min] | Type | Width [min] | Area [mAU*s] | Height [mAU] | Area %  |
|--------|---------------|------|-------------|--------------|--------------|---------|
| 1      | 17.033        | MM   | 0.3860      | 543.86902    | 23.48250     | 2.1344  |
| 2      | 18.603        | MM   | 0.4405      | 2.49374e4    | 943.42413    | 97.8656 |

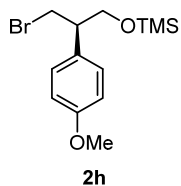

**(R)-3-bromo-2-(4-methoxyphenyl)propoxytrimethylsilane (2h):** Oxetane **1h** (65.7 mg, 0.4 mmol, 1 equiv.) underwent reaction according to General Procedure B to yield **2h** (126 mg, 0.40 mmol, 99% yield). **2h** was determined to be of 93% e.e. by chiral HPLC analysis of the desilylated alcohol (ChiralPak IB, 5% *i*-PrOH in hexanes, 1 mL/min,  $t_r$ (major)= 15.5 min,  $t_r$ (minor)= 14.6 min). The absolute configuration of **2h** was assigned by analogy to **2a**. **<sup>1</sup>H NMR** (600 MHz, CDCl<sub>3</sub>)  $\delta$  7.17 – 7.13 (m, 2H), 6.89 – 6.84 (m, 2H), 3.87 – 3.80 (m, 2H), 3.80 (s, 3H), 3.76 (dd,  $J$  = 10.2, 7.0 Hz, 1H), 3.60 (dd,  $J$  = 9.9, 7.3 Hz, 1H), 3.09 (qd,  $J$  = 6.9, 5.0 Hz, 1H), 0.08 (s, 9H) ppm; **<sup>13</sup>C NMR** (126 MHz, CDCl<sub>3</sub>)  $\delta$  158.8, 132.4, 129.0, 113.9, 64.8, 55.3, 49.3, 35.5, -0.5 ppm; **FT-IR** (thin-film): 2999, 2956, 2904, 2869, 2835, 1611, 1513, 1465, 1444, 1303, 1249, 1180, 1093, 1036, 870, 840, 748, 547 cm<sup>-1</sup>; **HRMS** (FTMS + p EI) calculated for C<sub>13</sub>H<sub>21</sub>BrO<sub>2</sub>Si• [M•]<sup>+</sup> 316.0489, found 316.0488;  $[\alpha]_D = -29.8^\circ$  (c = 1.0, CHCl<sub>3</sub>).

**Racemic sample:** HPLC (ChiralPak IB, 5% *i*-PrOH in hexanes, 1 mL/min, 220 nm)

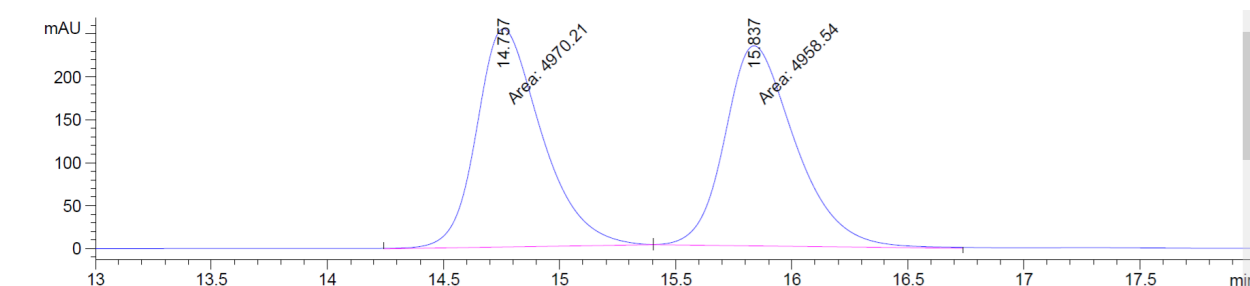

Signal 4: DAD1 D, Sig=220,16 Ref=450,100

| Peak # | RetTime [min] | Type | Width [min] | Area [mAU*s] | Height [mAU] | Area %  |
|--------|---------------|------|-------------|--------------|--------------|---------|
| 1      | 14.757        | MM   | 0.3256      | 4970.20947   | 254.38033    | 50.0588 |
| 2      | 15.837        | MM   | 0.3544      | 4958.54004   | 233.16539    | 49.9412 |

**Enantioenriched sample:** HPLC (ChiralPak IB, 5% *i*-PrOH in hexanes, 1 mL/min, 220 nm), 93% e.e.

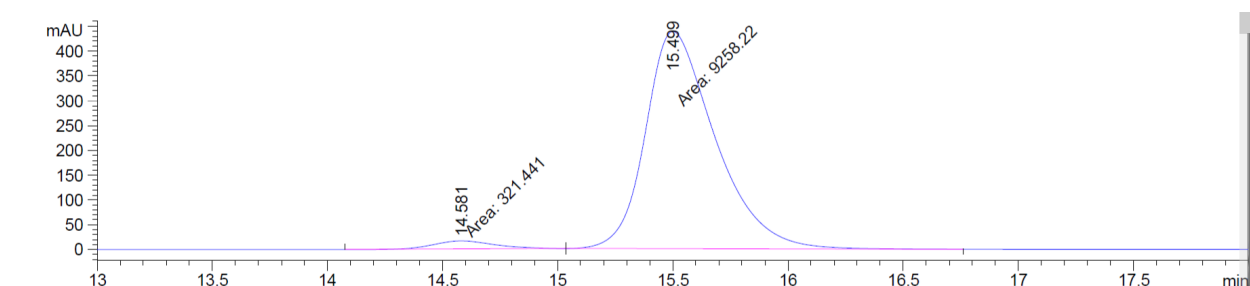

Signal 4: DAD1 D, Sig=220,16 Ref=450,100

| Peak # | RetTime [min] | Type | Width [min] | Area [mAU*s] | Height [mAU] | Area %  |
|--------|---------------|------|-------------|--------------|--------------|---------|
| 1      | 14.581        | MM   | 0.3209      | 321.44141    | 16.69322     | 3.3555  |
| 2      | 15.499        | MM   | 0.3521      | 9258.21973   | 438.28241    | 96.6445 |

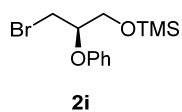

**(R)-(3-bromo-2-phenoxypropoxy)trimethylsilane (2i):** Oxetane **1i** (60.1 mg, 0.4 mmol, 1 equiv.) underwent reaction according to General Procedure C to yield **2i** (108.5 mg, 0.36 mmol, 89% yield). **2i** was determined to be of 97% e.e. by chiral HPLC analysis of the desilylated alcohol (ChiralCel OD-H, 10% *i*-PrOH in hexanes, 1 mL/min,  $t_{r}(\text{major})=10.3$  min,  $t_{r}(\text{minor})=13.7$  min). The absolute configuration of **2i** was assigned by analogy to **2a**, **2o**, and **2w**.  $^1\text{H NMR}$  (500 MHz,  $\text{CDCl}_3$ )  $\delta$  7.39 – 7.18 (m, 2H), 7.05 – 6.88 (m, 3H), 4.51 – 4.44 (m, 1H), 4.00 – 3.78 (m, 2H), 3.76 – 3.63 (m, 1H), 3.63 – 3.56 (m, 1H), 0.16 (s, 9H) ppm;  $^{13}\text{C NMR}$  (126 MHz,  $\text{CDCl}_3$ )  $\delta$  157.6, 129.8, 121.9, 116.5, 78.0, 62.3, 31.1, -0.3 ppm; **FT-IR** (thin-film): 2957, 1599, 1494, 1238, 1107, 902, 869, 842, 723, 692, 650  $\text{cm}^{-1}$ ; **HRMS** (FTMS + p EI) calculated for  $\text{C}_{12}\text{H}_{19}\text{BrO}_2\text{Si} \cdot [\text{M}\cdot]^+$  302.0332, found 302.033;  $[\alpha]_{\text{D}} = -23.8$  ( $c = 1.0$ ,  $\text{CHCl}_3$ ).

**Racemic sample:** HPLC (ChiralCel OD-H, 10% *i*-PrOH in hexanes, 1 mL/min, 254 nm)

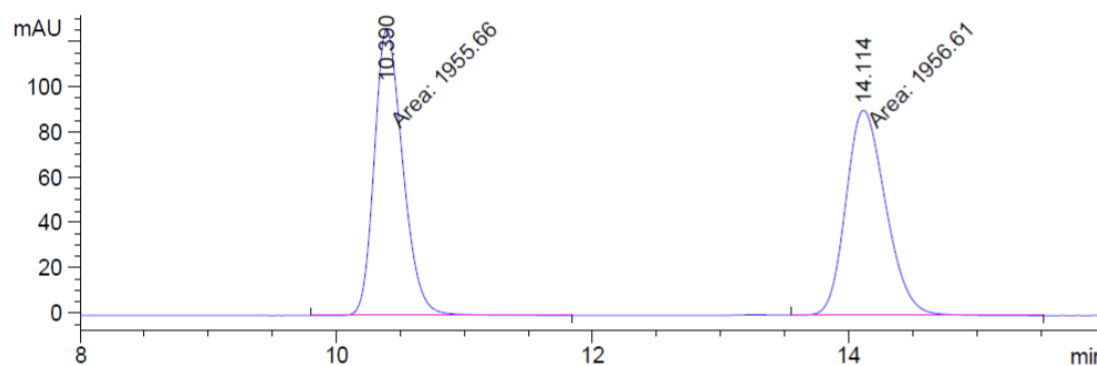

Signal 2: DAD1 B, Sig=254,4 Ref=450,100

| Peak # | RetTime [min] | Type | Width [min] | Area [mAU*s] | Height [mAU] | Area %  |
|--------|---------------|------|-------------|--------------|--------------|---------|
| 1      | 10.390        | MM   | 0.2582      | 1955.65857   | 126.25317    | 49.9879 |
| 2      | 14.114        | MM   | 0.3601      | 1956.60889   | 90.55547     | 50.0121 |

**Enantioenriched sample:** HPLC (ChiralCel OD-H, 10% *i*-PrOH in hexanes, 1 mL/min, 254 nm), 97% e.e.

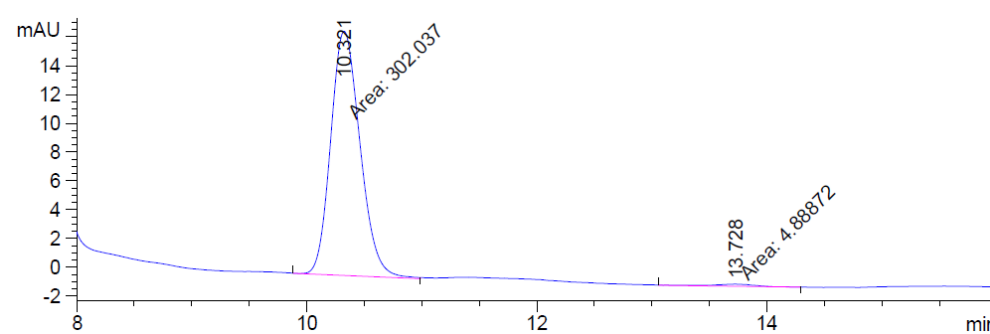

Signal 2: DAD1 B, Sig=254,4 Ref=450,100

| Peak # | RetTime [min] | Type | Width [min] | Area [mAU*s] | Height [mAU] | Area %  |
|--------|---------------|------|-------------|--------------|--------------|---------|
| 1      | 10.321        | MM   | 0.2965      | 302.03717    | 16.97544     | 98.4072 |
| 2      | 13.728        | MM   | 0.4881      | 4.88872      | 1.66925e-1   | 1.5928  |

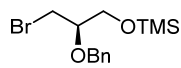

**2j**

**(R)-2-(benzyloxy)-3-bromopropoxytrimethylsilane (2j):** Oxetane **1j** (65.7 mg, 0.4 mmol, 1 equiv.) underwent reaction according to General Procedure B with the following modification: due to incomplete conversion the reaction was purified by flash column chromatography. The reaction yielded **2j** (111.5 mg, 0.351 mmol, 88% yield). **2j** was determined to be of 96% e.e. by chiral HPLC analysis of the desilylated alcohol (ChiralPak AD-H, 5% *i*-PrOH in hexanes, 1 mL/min,  $t_r(\text{major})=17.2$  min,  $t_r(\text{minor})=18.7$  min). The absolute configuration of **2j** was assigned by analogy to **2w**.  $^1\text{H NMR}$  (600 MHz,  $\text{CDCl}_3$ )  $\delta$  7.39 – 7.33 (m, 4H), 7.31 – 7.27 (m, 1H), 4.70 (d,  $J=11.8$  Hz, 1H), 4.62 (d,  $J=11.7$  Hz, 1H), 3.75 – 3.61 (m, 3H), 3.58 (dd,  $J=10.6, 4.9$  Hz, 1H), 3.49 (dd,  $J=10.6, 4.7$  Hz, 1H), 0.12 (s, 9H) ppm;  $^{13}\text{C NMR}$  (126 MHz,  $\text{CDCl}_3$ )  $\delta$  138.1, 128.6, 128.02, 127.96, 78.5, 72.3, 62.6, 32.5, -0.4 ppm; **FT-IR** (thin-film): 2954, 2917, 2862, 1252, 1099, 1071, 871, 842, 744, 698  $\text{cm}^{-1}$ ; **HRMS** (FTMS + p CI) calculated for  $\text{C}_{13}\text{H}_{20}\text{BrO}_2\text{Si}$   $[\text{M}-\text{H}]^+$  315.0410, found 315.0409;  $[\alpha]_D = -10.3^\circ$  ( $c=1.0, \text{CHCl}_3$ ).

**Racemic sample:** HPLC (ChiralPak AD-H, 5% *i*-PrOH in hexanes, 1 mL/min, 210 nm)

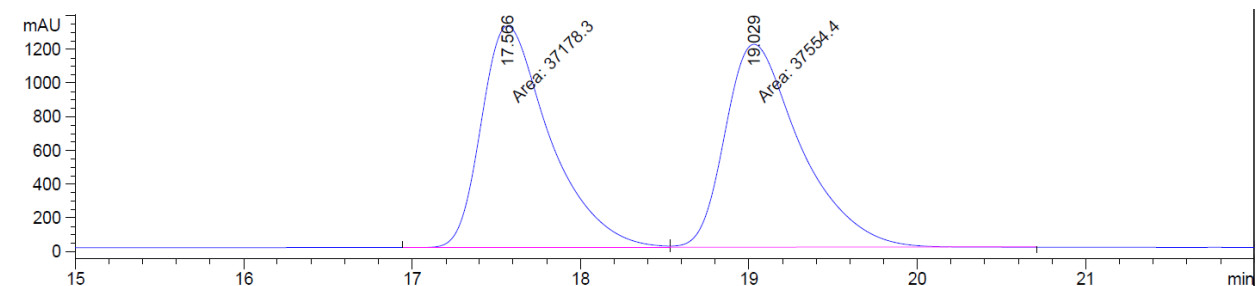

Signal 3: DAD1 C, Sig=210,4 Ref=450,100

| Peak # | RetTime [min] | Type | Width [min] | Area [mAU*s] | Height [mAU] | Area %  |
|--------|---------------|------|-------------|--------------|--------------|---------|
| 1      | 17.566        | MF   | 0.4713      | 3.71783e4    | 1314.86340   | 49.7484 |
| 2      | 19.029        | FM   | 0.5192      | 3.75544e4    | 1205.47534   | 50.2516 |

**Enantioenriched sample:** HPLC (ChiralPak AD-H, 5% *i*-PrOH in hexanes, 1 mL/min, 210 nm), 96% e.e.

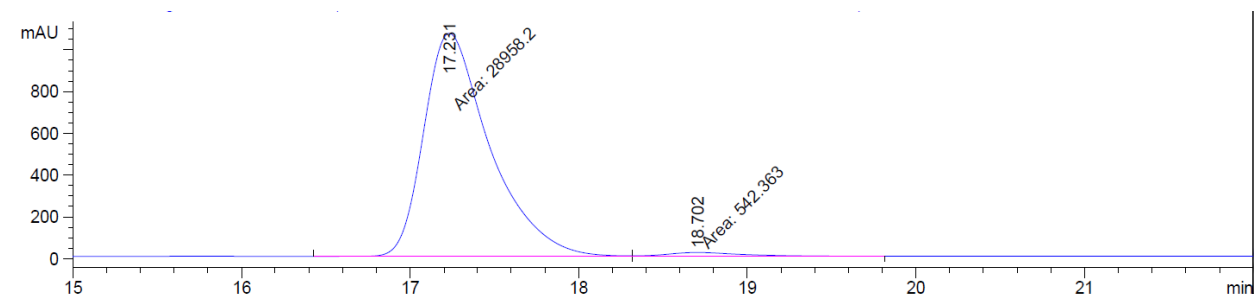

Signal 3: DAD1 C, Sig=210,4 Ref=450,100

| Peak # | RetTime [min] | Type | Width [min] | Area [mAU*s] | Height [mAU] | Area %  |
|--------|---------------|------|-------------|--------------|--------------|---------|
| 1      | 17.231        | MF   | 0.4529      | 2.89582e4    | 1065.54163   | 98.1615 |
| 2      | 18.702        | FM   | 0.5042      | 542.36340    | 17.92952     | 1.8385  |

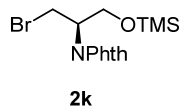

**(R)-2-(1-bromo-3-((trimethylsilyl)oxy)propan-2-yl)isoindoline-1,3-dione (2k):** Oxetane **1k** (81.3 mg, 0.4 mmol, 1 equiv.) underwent reaction according to General Procedure C with the following modification: the reaction was conducted at  $-25\text{ }^{\circ}\text{C}$  due to the insolubility of the oxetane starting material. The reaction yielded **2k** (115.4 mg, 0.32 mmol, 81% yield). **2k** was determined to be of 91% e.e. by chiral HPLC analysis of the deprotected alcohol (ChiralPak IB, 5% *i*-PrOH in hexanes, 1 mL/min,  $t_r(\text{major})=37.4\text{ min}$ ,  $t_r(\text{minor})=42.0\text{ min}$ ). The absolute configuration of **2k** was assigned by analogy to **2a**, **2o**, and **2w**.  $^1\text{H NMR}$  (500 MHz,  $\text{CDCl}_3$ )  $\delta$  7.86 (dd,  $J=5.4, 3.0\text{ Hz}$ , 2H), 7.76–7.72 (m, 2H), 4.63 (dtd,  $J=10.1, 7.3, 5.1\text{ Hz}$ , 1H), 4.05–3.97 (m, 2H), 3.94 (dd,  $J=10.2, 7.2\text{ Hz}$ , 1H), 3.80 (dd,  $J=10.6, 5.2\text{ Hz}$ , 1H), 0.07 (s, 9H) ppm;  $^{13}\text{C NMR}$  (126 MHz,  $\text{CDCl}_3$ )  $\delta$  168.2, 134.3, 131.8, 123.6, 61.3, 55.1, 29.5,  $-0.5$  ppm; **FT-IR** (thin-film) 2956, 1776, 1708, 1613, 1468, 1430, 1380, 1361, 1336, 1251, 1100, 1053, 1012, 866, 839, 750, 717, 530  $\text{cm}^{-1}$ ; **HRMS** (FTMS + p APCI corona) calculated for  $\text{C}_{14}\text{H}_{18}\text{BrNO}_3\text{Si}$   $[\text{M}+\text{H}]^+$  356.0312, found 356.0308;  $[\alpha]_D = -3.1$  ( $c = 1.0, \text{CHCl}_3$ ).

**Racemic sample:** HPLC (ChiralPak IB, 5% *i*-PrOH in hexanes, 1 mL/min, 230 nm)

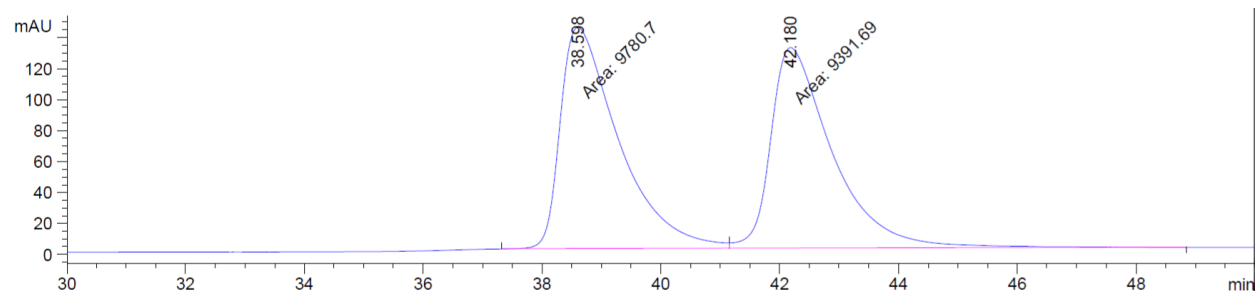

Signal 2: DAD1 B, Sig=230,4 Ref=450,100

| Peak # | RetTime [min] | Type | Width [min] | Area [mAU*s] | Height [mAU] | Area %  |
|--------|---------------|------|-------------|--------------|--------------|---------|
| 1      | 38.598        | MF   | 1.1406      | 9780.70215   | 142.92007    | 51.0145 |
| 2      | 42.180        | FM   | 1.2088      | 9391.68750   | 129.49091    | 48.9855 |

**Enantioenriched sample:** HPLC (ChiralPak IB, 5% *i*-PrOH in hexanes, 1 mL/min, 230 nm), 91% e.e.

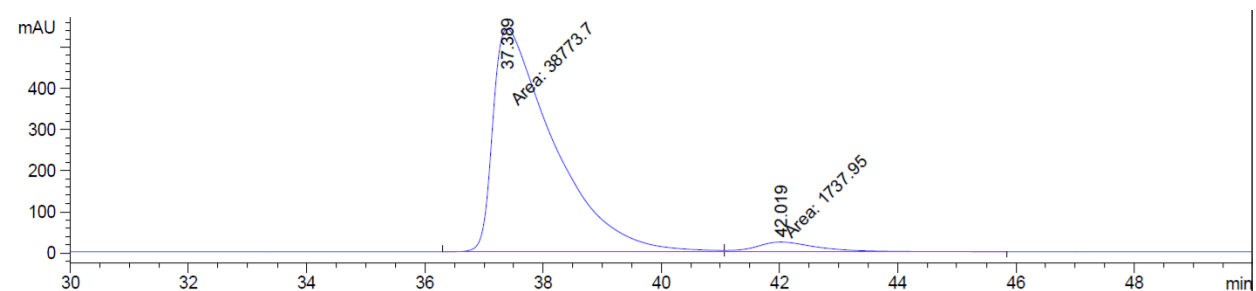

Signal 2: DAD1 B, Sig=230,4 Ref=450,100

| Peak # | RetTime [min] | Type | Width [min] | Area [mAU*s] | Height [mAU] | Area %  |
|--------|---------------|------|-------------|--------------|--------------|---------|
| 1      | 37.389        | MF   | 1.1928      | 3.87737e4    | 541.75299    | 95.7100 |
| 2      | 42.019        | FM   | 1.2261      | 1737.94653   | 23.62377     | 4.2900  |

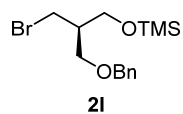

**(R)-3-(benzyloxy)-2-(bromomethyl)propoxytrimethylsilane (21):** Oxetane **11** (71 mg, 0.4 mmol, 1 equiv.) underwent reaction according to General Procedure B to yield **21** (124.1 mg, 0.375 mmol, 94% yield). **21** was determined to be of 90% e.e. by chiral HPLC analysis of the desilylated alcohol (ChiralCel OJ-H, 5% *i*-PrOH in hexanes, 1 mL/min,  $t_r(\text{major})=29.5$  min,  $t_r(\text{minor})=32.1$  min). The absolute configuration of **21** was assigned by analogy to **2a**, **2o**, and **2w**. **<sup>1</sup>H NMR** (600 MHz, CDCl<sub>3</sub>)  $\delta$  7.38 – 7.31 (m, 4H), 7.32 – 7.27 (m, 1H), 4.52 (s, 2H), 3.68 (ddd,  $J=10.2, 5.4, 1.1$  Hz, 1H), 3.62 (ddd,  $J=10.2, 6.5, 1.1$  Hz, 1H), 3.57 (dt,  $J=5.6, 1.1$  Hz, 2H), 3.57 – 3.53 (m, 1H), 3.52 – 3.47 (m, 1H), 2.23 – 2.15 (m, 1H), 0.12 (d,  $J=1.1$  Hz, 9H) ppm; **<sup>13</sup>C NMR** (126 MHz, CDCl<sub>3</sub>)  $\delta$  138.4, 128.5, 127.74, 127.70, 73.4, 69.1, 61.4, 43.7, 33.2, -0.4 ppm; **FT-IR** (thin-film): 3031, 2955, 2901, 2864, 1454, 1363, 1251, 1087, 869, 838, 746, 697 cm<sup>-1</sup>; **HRMS** (FTMS + p CI) calculated for C<sub>14</sub>H<sub>24</sub>BrO<sub>2</sub>Si [M+H]<sup>+</sup> 331.0723, found 331.0724; [ $\alpha$ ]<sub>D</sub> = -1.2° (c = 1.0, CHCl<sub>3</sub>).

**Racemic sample:** HPLC (ChiralCel OJ-H, 5% *i*-PrOH in hexanes, 1 mL/min, 210 nm)

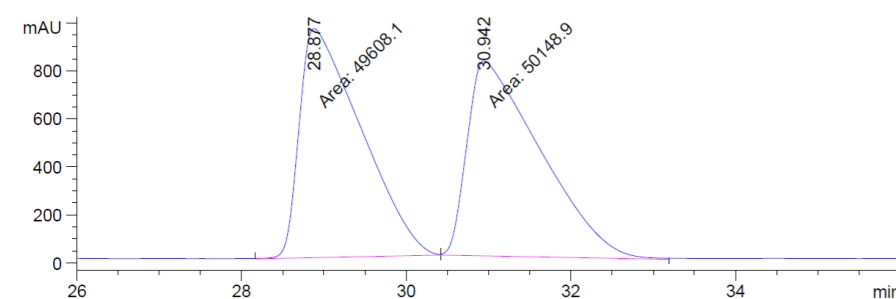

Signal 4: DAD1 D, Sig=210,4 Ref=450,100

| Peak # | RetTime [min] | Type | Width [min] | Area [mAU*s] | Height [mAU] | Area %  |
|--------|---------------|------|-------------|--------------|--------------|---------|
| 1      | 28.877        | MM   | 0.8667      | 4.96081e4    | 954.00372    | 49.7289 |
| 2      | 30.942        | MM   | 1.0290      | 5.01489e4    | 812.25208    | 50.2711 |

**Enantioenriched sample:** HPLC (ChiralCel OJ-H, 5% *i*-PrOH in hexanes, 1 mL/min, 210 nm), 90% e.e.

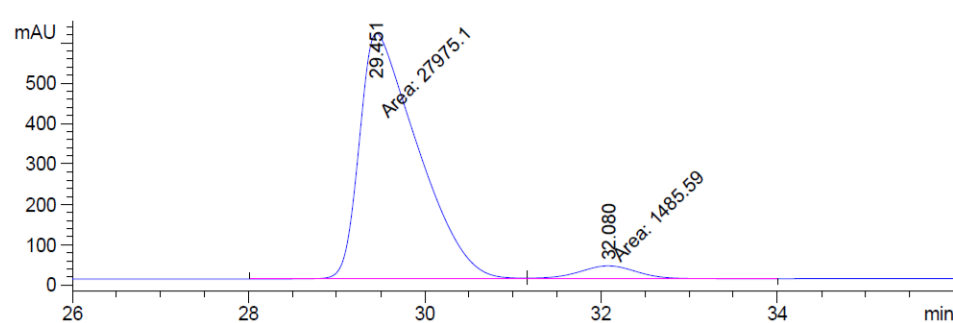

Signal 4: DAD1 D, Sig=210,4 Ref=450,100

| Peak # | RetTime [min] | Type | Width [min] | Area [mAU*s] | Height [mAU] | Area %  |
|--------|---------------|------|-------------|--------------|--------------|---------|
| 1      | 29.451        | MF   | 0.7661      | 2.79751e4    | 608.57654    | 94.9574 |
| 2      | 32.080        | FM   | 0.7710      | 1485.59302   | 32.11270     | 5.0426  |



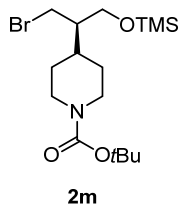

**tert-butyl (R)-4-(1-bromo-3-((trimethylsilyl)oxy)propan-2-yl)piperidine-1-carboxylate (2m):**

Oxetane **1m** (97 mg, 0.4 mmol, 1 equiv.) underwent reaction according to General Procedure C with the following modification: the reaction was run for 48 hours. The reaction yielded **2m** (150.2 mg, 0.38 mmol, 95% yield). **2m** was determined to be of 96% e.e. by chiral HPLC analysis of the deprotected alcohol (ChiralPak AS-H, 5% *i*-PrOH in hexanes, 1 mL/min,  $t_r(\text{major})=17.4$  min,  $t_r(\text{minor})=14.0$  min). The absolute configuration of **2m** was assigned by analogy to **2a** and **2o**. <sup>1</sup>H NMR (600 MHz, CDCl<sub>3</sub>) δ 4.12 (br, 2H), 3.73 (dd,  $J=10.2, 3.8$  Hz, 1H), 3.68 (dd,  $J=10.1, 3.2$  Hz, 1H), 3.55 (dd,  $J=10.2, 6.9$  Hz, 1H), 3.52–3.47 (m, 1H), 2.72–2.61 (m, 2H), 1.77–1.65 (m, 2H), 1.63–1.55 (m, 2H), 1.45 (s, 9H), 1.29–1.12 (m, 2H), 0.12 (s, 9H) ppm; <sup>13</sup>C NMR (126 MHz, CDCl<sub>3</sub>) δ 154.8, 79.4, 60.8, 47.0, 45.3–42.8 (br), 35.6, 34.3, 29.5 (br), 28.5, -0.5 ppm; FT-IR (thin-film): 2955, 1691, 1467, 1422, 1392, 1364, 1250, 1165, 1081, 1020, 867, 838, 747 cm<sup>-1</sup>; HRMS (ESI-TOF) calculated for C<sub>16</sub>H<sub>33</sub>BrNO<sub>3</sub>Si [M+H]<sup>+</sup> 394.1408, found 394.1408; [α]<sub>D</sub> = +0.6° (c = 1.0, CHCl<sub>3</sub>).

**Racemic sample:** HPLC (ChiralPak AS-H, 5% *i*-PrOH in hexanes, 1 mL/min, 210 nm)

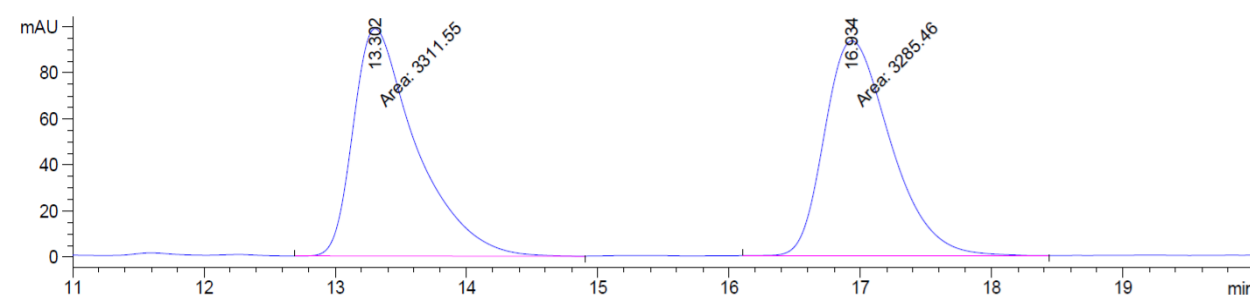

Signal 3: DAD1 C, Sig=210,4 Ref=450,100

| Peak # | RetTime [min] | Type | Width [min] | Area [mAU*s] | Height [mAU] | Area %  |
|--------|---------------|------|-------------|--------------|--------------|---------|
| 1      | 13.302        | MM   | 0.5580      | 3311.54810   | 98.90836     | 50.1977 |
| 2      | 16.934        | MM   | 0.5861      | 3285.46265   | 93.42296     | 49.8023 |

**Enantioenriched sample:** HPLC (ChiralPak AS-H, 5% *i*-PrOH in hexanes, 1 mL/min, 210 nm), 96% e.e.

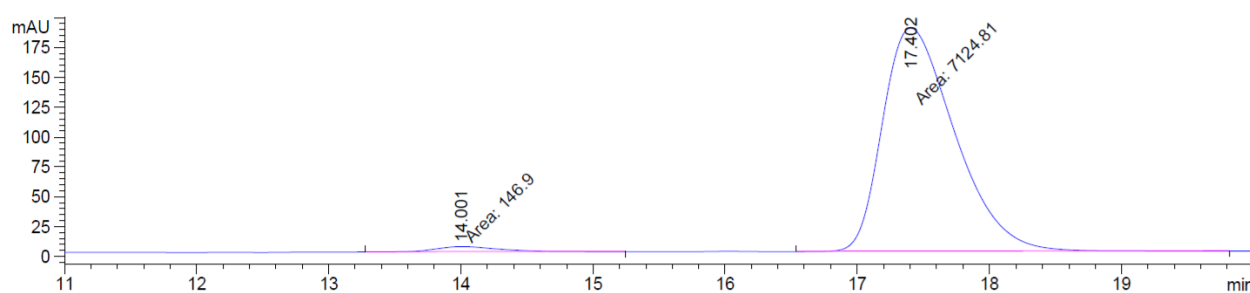

Signal 3: DAD1 C, Sig=210,4 Ref=450,100

| Peak # | RetTime [min] | Type | Width [min] | Area [mAU*s] | Height [mAU] | Area %  |
|--------|---------------|------|-------------|--------------|--------------|---------|
| 1      | 14.001        | MM   | 0.5579      | 146.89992    | 4.38868      | 2.0202  |
| 2      | 17.402        | MM   | 0.6339      | 7124.81445   | 187.33537    | 97.9798 |

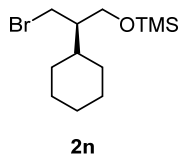

**(R)-(3-bromo-2-cyclohexylpropoxy)trimethylsilane (2n):** Oxetane **1n** (56.1 mg, 0.4 mmol, 1 equiv.) underwent reaction according to General Procedure B with the following modification: due to incomplete conversion the reaction was purified by flash column chromatography. The reaction yielded **2n** (97.5 mg, 0.33 mmol, 83% yield). **2n** was determined to be of 99% e.e. by chiral GC analysis (CP-Chirasil-Dex CB – 25m x 0.25 mm x 0.25  $\mu$ m, 125  $^{\circ}$ C for 25 minutes, 125 $\rightarrow$ 150  $^{\circ}$ C at 1 $^{\circ}$ /min, 150 $\rightarrow$ 200  $^{\circ}$ C at 5 $^{\circ}$ /min, 7 psi,  $t_r$ (major)= 22.9 min,  $t_r$ (minor)= 22.6 min).

The absolute configuration of **2n** was assigned by analogy to **2a** and **2o**.  $^1\text{H NMR}$  (600 MHz,  $\text{CDCl}_3$ )  $\delta$  3.73 (dd,  $J$  = 10.2, 4.6 Hz, 1H), 3.67 (dd,  $J$  = 9.9, 4.1 Hz, 1H), 3.56 – 3.50 (m, 2H), 1.78 (ddq,  $J$  = 12.1, 3.5, 1.8 Hz, 1H), 1.76 – 1.69 (m, 3H), 1.65 (dddd,  $J$  = 12.6, 5.0, 3.2, 1.5 Hz, 1H), 1.62 – 1.55 (m, 1H), 1.49 – 1.42 (m, 1H), 1.30 – 1.18 (m, 2H), 1.14 (qt,  $J$  = 12.6, 3.3 Hz, 1H), 1.04 – 0.95 (m, 2H), 0.12 (s, 9H) ppm;  $^{13}\text{C NMR}$  (126 MHz,  $\text{CDCl}_3$ )  $\delta$  61.2, 47.7, 37.0, 35.2, 30.5, 30.4, 26.64, 26.57, 26.53, -0.4 ppm; **FT-IR** (thin-film) 2922, 2853, 1449, 1432, 1250, 1085, 1024, 996, 944, 891, 875, 839, 747, 684, 655, 625  $\text{cm}^{-1}$ ; **HRMS** (FTMS + p CI) calculated for  $\text{C}_{12}\text{H}_{26}\text{BrOSi}$  [ $\text{M}-\text{H}$ ] $^+$  293.0931, found 293.0931;  $[\alpha]_D = -2.2^{\circ}$  ( $c = 1.0$ ,  $\text{CHCl}_3$ ).

**Racemic sample:** GC (CP-Chirasil-Dex CB – 25m x 0.25 mm x 0.25  $\mu$ m, 125  $^{\circ}$ C for 25 minutes, 125 $\rightarrow$ 150  $^{\circ}$ C at 1 $^{\circ}$ /min, 150 $\rightarrow$ 200  $^{\circ}$ C at 5 $^{\circ}$ /min, 7 psi)

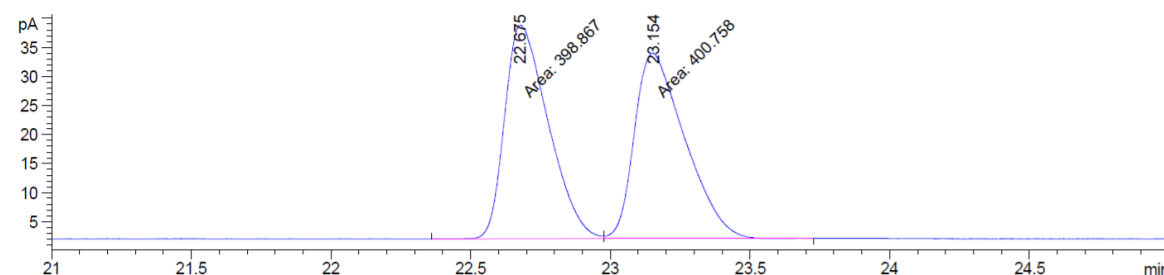

Signal 2: FID2 B, Back Signal

| Peak # | RetTime [min] | Type | Width [min] | Area [pA*s] | Height [pA] | Area %   |
|--------|---------------|------|-------------|-------------|-------------|----------|
| 1      | 22.675        | MF   | 0.1808      | 398.86673   | 36.77726    | 49.88176 |
| 2      | 23.154        | FM   | 0.2089      | 400.75766   | 31.97166    | 50.11824 |

**Enantioenriched sample:** GC (CP-Chirasil-Dex CB – 25m x 0.25 mm x 0.25  $\mu$ m, 125  $^{\circ}$ C for 25 minutes, 125 $\rightarrow$ 150  $^{\circ}$ C at 1 $^{\circ}$ /min, 150 $\rightarrow$ 200  $^{\circ}$ C at 5 $^{\circ}$ /min, 7 psi), 99% e.e.

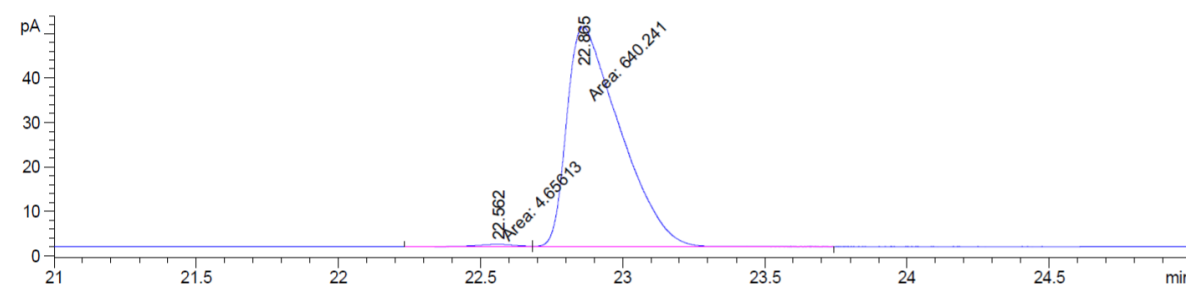

Signal 2: FID2 B, Back Signal

| Peak # | RetTime [min] | Type | Width [min] | Area [pA*s] | Height [pA] | Area %   |
|--------|---------------|------|-------------|-------------|-------------|----------|
| 1      | 22.562        | MF   | 0.1514      | 4.65613     | 5.12565e-1  | 0.72200  |
| 2      | 22.865        | FM   | 0.2158      | 640.24121   | 49.45528    | 99.27800 |

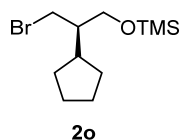

**(R)-3-bromo-2-cyclopentylpropoxytrimethylsilane (2o):** Oxetane **1o** (50 mg, 0.4 mmol, 1 equiv.) underwent reaction according to General Procedure B to yield **2o** (102.0 mg, 0.36 mmol, 91% yield). Separation conditions could not be identified to allow for the direct determination of the e.e. of **2o**, but its triazole derivative **26o** was determined to be of 93% e.e. by chiral HPLC analysis (see below). The absolute configuration of this compound was assigned by X-ray

crystallographic analysis of its triazole derivative **26o**. <sup>1</sup>H NMR (600 MHz, CDCl<sub>3</sub>) δ 3.76 (dd, *J* = 9.8, 2.8 Hz, 1H), 3.71 – 3.67 (m, 1H), 3.56 – 3.50 (m, 2H), 1.92 – 1.83 (m, 1H), 1.83 – 1.71 (m, 2H), 1.69 – 1.59 (m, 2H), 1.59 – 1.47 (m, 3H), 1.20 – 1.07 (m, 2H), 0.12 (s, 9H) ppm; <sup>13</sup>C NMR (126 MHz, CDCl<sub>3</sub>) δ 62.0, 48.2, 39.7, 36.7, 30.9, 30.8, 25.3, 24.8, -0.4 ppm; FT-IR (thin-film): 2953, 2910, 2870, 1470, 1451, 1431, 1251, 1093, 872, 839, 747 cm<sup>-1</sup>; HRMS (FTMS + p CI) calculated for C<sub>11</sub>H<sub>24</sub>BrOSi [M+H]<sup>+</sup> 279.0774, found 279.0775; [α]<sub>D</sub> = -3.4° (c = 1.0, CHCl<sub>3</sub>).

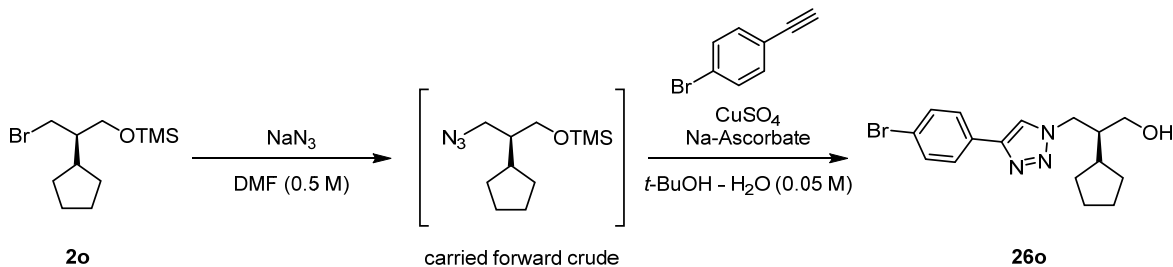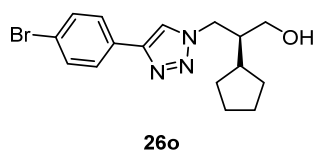

**(S)-3-(4-(4-bromophenyl)-1H-1,2,3-triazol-1-yl)-2-cyclopentylpropan-1-ol (26o):** Alkyl bromide **2o** (50 mg, 0.179 mmol, 1 equiv.) was dissolved in DMF (1.4 mL, 0.125 M) and then sodium azide (47 mg, 0.716 mmol, 4 equiv.) was added. The reaction was allowed to proceed overnight at room temperature with vigorous stirring. The following day, the reaction was diluted with Et<sub>2</sub>O and quenched by the

addition of saturated aqueous NaHCO<sub>3</sub>. The aqueous layer was removed and the organic layer was washed 3x with saturated aqueous NaHCO<sub>3</sub>, washed with brine, dried over MgSO<sub>4</sub>, filtered, and concentrated. The crude product was carried forward assuming complete conversion by dissolving it in a 1 : 1 mixture of *t*-BuOH and water (1.79 mL of each solvent, 0.05 M overall). Then 1-bromo-4-ethynylbenzene (39 mg, 0.215 mmol, 1.2 equiv.), copper(II) sulfate pentahydrate (11 mg, 0.045 mmol, 0.25 equiv.), and sodium ascorbate (18 mg, 0.090 mmol, 0.5 equiv.) were added and the reaction was allowed to continue overnight at room temperature with vigorous stirring. The following day, the reaction was diluted with EtOAc and water. The organic layer was removed, and the aqueous layer was extracted 3x with EtOAc. The combined organic layers were washed with brine, dried over Na<sub>2</sub>SO<sub>4</sub>, filtered, concentrated, and purified by flash column chromatography to yield triazole **26o** (54.5 mg, 0.156 mmol, 87% yield over both steps). **26o** was determined to be of 93% e.e. by chiral HPLC analysis (ChiralPak AD-H, 20% *i*-PrOH in hexanes, 1 mL/min, *t*<sub>r</sub>(major) = 9.4 min, *t*<sub>r</sub>(minor) = 10.7 min). <sup>1</sup>H NMR (600 MHz, CDCl<sub>3</sub>) δ 7.84 (s, 1H), 7.67 (d, *J* = 8.5 Hz, 2H), 7.51 (d, *J* = 8.5 Hz, 2H), 4.58 (dd, *J* = 13.9, 4.4 Hz, 1H), 4.49 (dd, *J* = 13.9, 7.4 Hz, 1H), 3.54 (dd, *J* = 11.4, 3.8 Hz, 1H), 3.47 (dd, *J* = 11.4, 6.3 Hz, 1H), 2.84 – 2.66 (br, 1H), 1.97 (dtd, *J* = 11.3, 7.4, 3.0 Hz, 1H), 1.87 (dtt, *J* = 10.8, 7.2, 4.1 Hz, 1H), 1.79 (dtd, *J* = 10.0, 7.2, 2.7 Hz, 1H), 1.76 – 1.69 (m, 1H), 1.69 – 1.61 (m, 2H), 1.60 – 1.45 (m, 2H), 1.25 (ddd, *J* = 14.2, 10.6, 6.4 Hz, 1H), 1.14 (dq, *J* = 11.7, 8.7 Hz, 1H) ppm; <sup>13</sup>C NMR (126 MHz, CDCl<sub>3</sub>) δ 146.6, 132.1, 129.6, 127.3, 122.1, 121.2, 61.2, 50.3, 47.3, 39.2, 31.2, 30.9, 25.1, 25.0 ppm; FT-IR (thin-film): 3382 (br), 3134, 2952, 2868, 1549, 1481, 1453, 1402, 1357, 1226, 1194, 1070, 1052, 1011, 973, 824, 512 cm<sup>-1</sup>; HRMS (ESI-TOF) calculated for C<sub>16</sub>H<sub>21</sub>BrN<sub>3</sub>O [M+H]<sup>+</sup> 350.0863, found 350.0860; [α]<sub>D</sub> = +6.0° (c = 1.0, CHCl<sub>3</sub>). A crystal suitable for X-ray diffraction of the HCl salt of **26o** was grown by vapor diffusion of an ethereal solution of HCl into a solution of triazole **26o** in diethyl ether, allowing for the assignment of the absolute configuration of **2o** (see section SI-X-Ray crystallography for crystallographic details).

**Racemic sample:** HPLC (ChiralPak AD-H, 20% *i*-PrOH in hexanes, 1 mL/min, 230 nm)

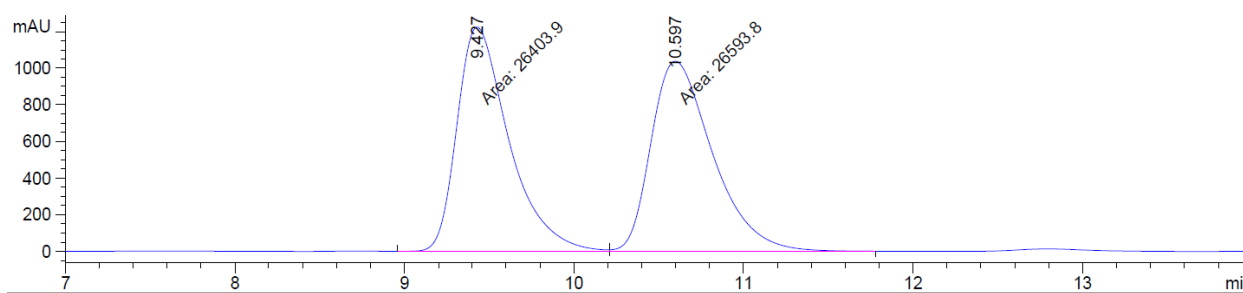

Signal 3: DAD1 C, Sig=230,4 Ref=450,100

| Peak # | RetTime [min] | Type | Width [min] | Area [mAU*s] | Height [mAU] | Area %  |
|--------|---------------|------|-------------|--------------|--------------|---------|
| 1      | 9.427         | MF   | 0.3581      | 2.64039e4    | 1229.04126   | 49.8208 |
| 2      | 10.597        | FM   | 0.4252      | 2.65938e4    | 1042.48926   | 50.1792 |

**Enantioenriched sample:** HPLC (ChiralPak AD-H, 20% *i*-PrOH in hexanes, 1 mL/min, 230 nm), 93% e.e.

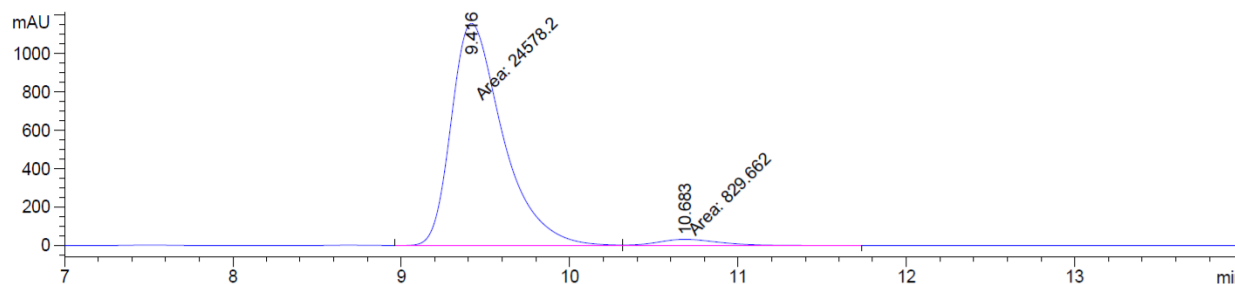

Signal 3: DAD1 C, Sig=230,4 Ref=450,100

| Peak # | RetTime [min] | Type | Width [min] | Area [mAU*s] | Height [mAU] | Area %  |
|--------|---------------|------|-------------|--------------|--------------|---------|
| 1      | 9.416         | MF   | 0.3545      | 2.45782e4    | 1155.51648   | 96.7346 |
| 2      | 10.683        | FM   | 0.4280      | 829.66180    | 32.30447     | 3.2654  |

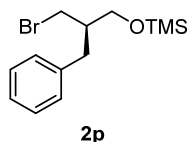

**(R)-(2-benzyl-3-bromopropoxy)trimethylsilane (2p):** Oxetane **1p** (59.3 mg, 0.4 mmol, 1 equiv.) underwent reaction according to General Procedure B to yield **2p** (106.4 mg, 0.35 mmol, 88% yield). **2p** was determined to be of 85% e.e. by chiral HPLC analysis of the deprotected alcohol (ChiralPak AD-H, 5% *i*-PrOH in hexanes, 1 mL/min,  $t_r(\text{major})=14.2$  min,  $t_r(\text{minor})=12.6$  min). The absolute configuration of **2p** was assigned by analogy to **2a** and **2o**. **<sup>1</sup>H NMR** (600 MHz, CDCl<sub>3</sub>)  $\delta$  7.32 – 7.28 (m, 2H), 7.24 – 7.19 (m, 3H), 3.61 (dd,  $J = 10.2, 4.8$  Hz, 1H), 3.58 – 3.52 (m, 2H), 3.39 (dd,  $J = 9.9, 5.1$  Hz, 1H), 2.72 – 2.63 (m, 2H), 2.10 (tddd,  $J = 11.7, 9.1, 5.8, 4.6$  Hz, 1H), 0.12 (s, 9H) ppm; **<sup>13</sup>C NMR** (126 MHz, CDCl<sub>3</sub>)  $\delta$  139.5, 129.3, 128.6, 126.4, 62.9, 44.5, 36.0, 35.6, -0.4 ppm; **FT-IR** (thin-film) 3064, 3028, 2956, 2903, 2865, 1604, 1496, 1470, 1454, 1250, 1090, 1040, 978, 874, 837, 740, 699 cm<sup>-1</sup>; **HRMS** (FTMS + p APCI corona) calculated for C<sub>10</sub>H<sub>13</sub>BrO [M-TMS+H<sub>2</sub>]<sup>+</sup> 229.0223, found 229.0221;  $[\alpha]_D = -2.3^\circ$  ( $c = 1.0$ , CHCl<sub>3</sub>).

**Racemic sample:** HPLC (ChiralPak AD-H, 5% *i*-PrOH in hexanes, 1 mL/min, 210 nm)

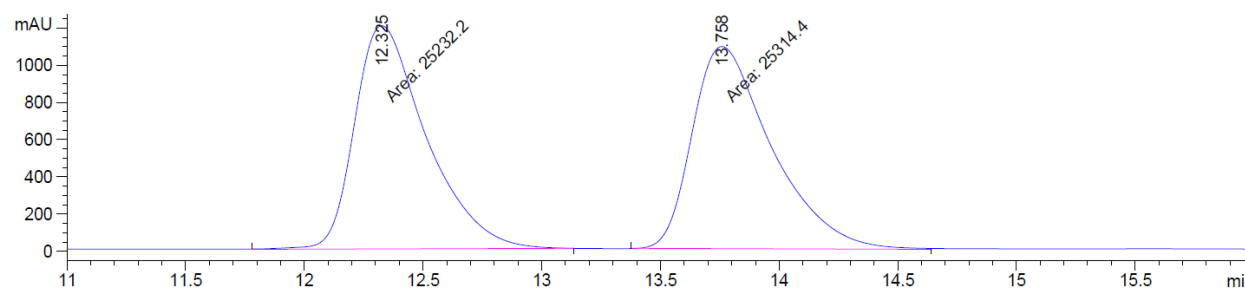

Signal 3: DAD1 C, Sig=210,4 Ref=450,100

| Peak # | RetTime [min] | Type | Width [min] | Area [mAU*s] | Height [mAU] | Area %  |
|--------|---------------|------|-------------|--------------|--------------|---------|
| 1      | 12.325        | MM   | 0.3501      | 2.52322e4    | 1201.07080   | 49.9187 |
| 2      | 13.758        | MM   | 0.3879      | 2.53144e4    | 1087.66833   | 50.0813 |

**Enantioenriched sample:** HPLC (ChiralPak AD-H, 5% *i*-PrOH in hexanes, 1 mL/min, 210 nm), 85% e.e.

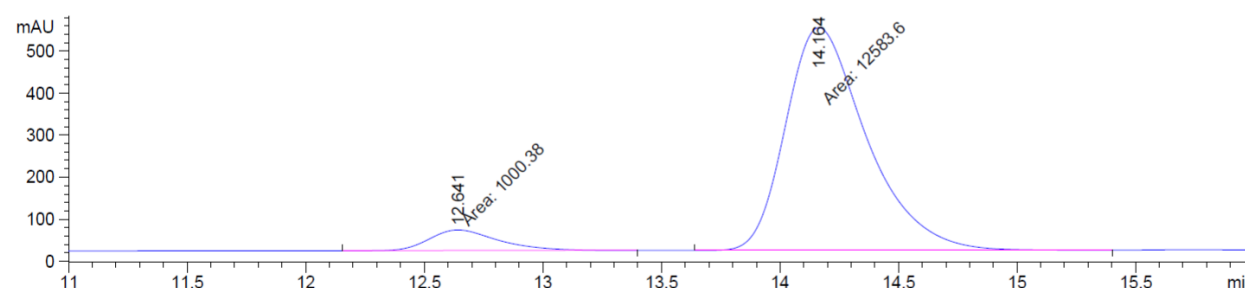

Signal 3: DAD1 C, Sig=210,4 Ref=450,100

| Peak # | RetTime [min] | Type | Width [min] | Area [mAU*s] | Height [mAU] | Area %  |
|--------|---------------|------|-------------|--------------|--------------|---------|
| 1      | 12.641        | MM   | 0.3383      | 1000.37946   | 49.28965     | 7.3644  |
| 2      | 14.164        | MM   | 0.3955      | 1.25836e4    | 530.24762    | 92.6356 |

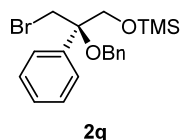

**(R)-2-(benzyloxy)-3-bromo-2-phenylpropoxytrimethylsilane (2q):** Oxetane **1q** (96.1 mg, 0.4 mmol, 1 equiv.) underwent reaction according to General Procedure D to yield **2q** (92.4 mg, 0.24 mmol, 59% yield, 83% yield BRSM). **2q** was determined to be of 82% e.e. by chiral HPLC analysis of the desilylated alcohol (ChiralPak IB, 5% *i*-PrOH in hexanes, 1 mL/min,  $t_r$ (major)= 12.0 min,  $t_r$ (minor)= 10.9 min). The absolute configuration of **2q** was assigned by analogy to **2t**. **<sup>1</sup>H NMR** (600 MHz, CDCl<sub>3</sub>)  $\delta$  7.47 – 7.44 (m, 2H), 7.40 – 7.26 (m, 8H), 4.44 (d,  $J$  = 10.6 Hz, 1H), 4.31 (d,  $J$  = 10.6 Hz, 1H), 4.19 (d,  $J$  = 10.7 Hz, 1H), 4.12 (d,  $J$  = 9.9 Hz, 1H), 3.92 (dd,  $J$  = 10.7, 1.0 Hz, 1H), 3.80 (dd,  $J$  = 9.9, 1.0 Hz, 1H), –0.02 (s, 9H) ppm; **<sup>13</sup>C NMR** (126 MHz, CDCl<sub>3</sub>)  $\delta$  140.1, 138.4, 128.45, 128.42, 128.0, 127.8, 127.6, 127.2, 79.9, 66.0, 65.0, 36.2, –0.6 ppm; **FT-IR** (thin-film): 3089, 3063, 3032, 2955, 2875, 1496, 1447, 1251, 1155, 1107, 1068, 1028, 871, 838, 746, 730, 696, 590, 560 cm<sup>-1</sup>; **HRMS** (FTMS + p APCI corona) calculated for C<sub>19</sub>H<sub>26</sub>BrO<sub>2</sub>Si [M+H]<sup>+</sup> 393.0880, found 393.0873;  $[\alpha]_D^{25}$  = +41.4° (c = 1.0, CHCl<sub>3</sub>).

**Racemic sample:** HPLC (ChiralPak IB, 5% *i*-PrOH in hexanes, 1 mL/min, 210 nm)

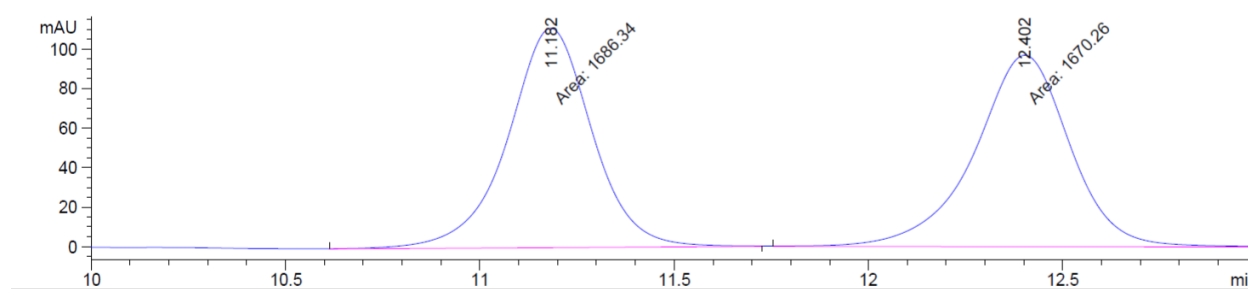

Signal 3: DAD1 C, Sig=210,4 Ref=450,100

| Peak # | RetTime [min] | Type | Width [min] | Area [mAU*s] | Height [mAU] | Area %  |
|--------|---------------|------|-------------|--------------|--------------|---------|
| 1      | 11.182        | MM   | 0.2527      | 1686.33630   | 111.21729    | 50.2395 |
| 2      | 12.402        | MM   | 0.2869      | 1670.26025   | 97.04285     | 49.7605 |

**Enantioenriched sample:** HPLC (ChiralPak IB, 5% *i*-PrOH in hexanes, 1 mL/min, 210 nm), 82% e.e.

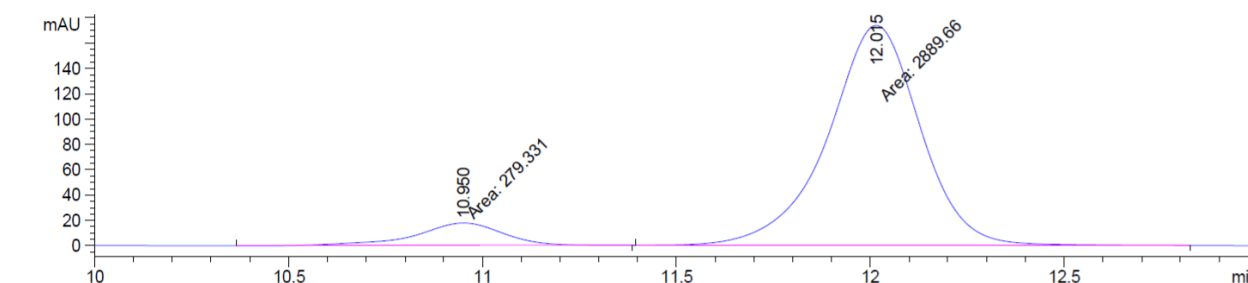

Signal 3: DAD1 C, Sig=210,4 Ref=450,100

| Peak # | RetTime [min] | Type | Width [min] | Area [mAU*s] | Height [mAU] | Area %  |
|--------|---------------|------|-------------|--------------|--------------|---------|
| 1      | 10.950        | MM   | 0.2619      | 279.33066    | 17.77384     | 8.8145  |
| 2      | 12.015        | MM   | 0.2771      | 2889.65698   | 173.78247    | 91.1855 |

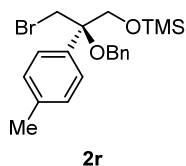

**(R)-2-(benzyloxy)-3-bromo-2-(p-tolyl)propoxytrimethylsilane (2r):** Oxetane **1r** (101.7 mg, 0.4 mmol, 1 equiv.) underwent reaction according to General Procedure D to yield **2r** (125.9 mg, 0.31 mmol, 77% yield). **2r** was determined to be of 92% e.e. by chiral HPLC analysis of the desilylated alcohol (ChiralPak AD-H, 5% *i*-PrOH in hexanes, 1 mL/min,  $t_r(\text{major})=16.2$  min,  $t_r(\text{minor})=19.4$  min). The absolute configuration of **2r** was assigned by analogy to **2t**. **<sup>1</sup>H NMR** (600 MHz, CDCl<sub>3</sub>)  $\delta$  7.39 – 7.36 (m, 2H), 7.36 – 7.31 (m, 4H), 7.29 – 7.26 (m, 1H), 7.19 (d,  $J=7.7$  Hz, 2H), 4.41 (d,  $J=10.6$  Hz, 1H), 4.30 (d,  $J=10.7$  Hz, 1H), 4.14 (dd,  $J=10.7, 0.8$  Hz, 1H), 4.10 (d,  $J=9.9$  Hz, 1H), 3.92 – 3.89 (m, 1H), 3.81 (dd,  $J=10.0, 0.8$  Hz, 1H), 2.36 (s, 3H), 0.00 (s, 9H) ppm; **<sup>13</sup>C NMR** (126 MHz, CDCl<sub>3</sub>)  $\delta$  138.5, 137.6, 136.9, 129.1, 128.4, 127.8, 127.5, 127.0, 79.8, 65.8, 64.9, 36.4, 21.2, -0.6 ppm; **FT-IR** (thin-film): 3031, 2955, 2923, 2873, 1512, 1498, 1454, 1425, 1382, 1250, 1158, 1105, 1069, 1028, 872, 839, 824, 746, 734, 695, 667, 562, 547, 480 cm<sup>-1</sup>; **HRMS** (FTMS + p APCI corona) calculated for C<sub>20</sub>H<sub>27</sub>BrO<sub>2</sub>SiNa [M+Na]<sup>+</sup> 429.0856, found 429.0851;  $[\alpha]_D^{25} = +44.4^\circ$  (c = 1.0, CHCl<sub>3</sub>).

**Racemic sample:** HPLC (ChiralPak AD-H, 5% *i*-PrOH in hexanes, 1 mL/min, 210 nm)

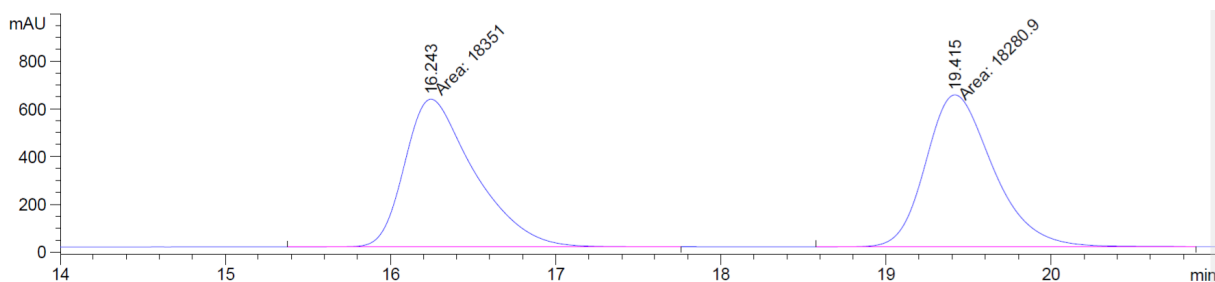

Signal 3: DAD1 C, Sig=210,4 Ref=450,100

| Peak # | RetTime [min] | Type | Width [min] | Area [mAU*s] | Height [mAU] | Area %  |
|--------|---------------|------|-------------|--------------|--------------|---------|
| 1      | 16.243        | MM   | 0.4927      | 1.83510e4    | 620.80194    | 50.0957 |
| 2      | 19.415        | MM   | 0.4773      | 1.82809e4    | 638.35321    | 49.9043 |

**Enantioenriched sample:** HPLC (ChiralPak AD-H, 5% *i*-PrOH in hexanes, 1 mL/min, 210 nm), 92% e.e.

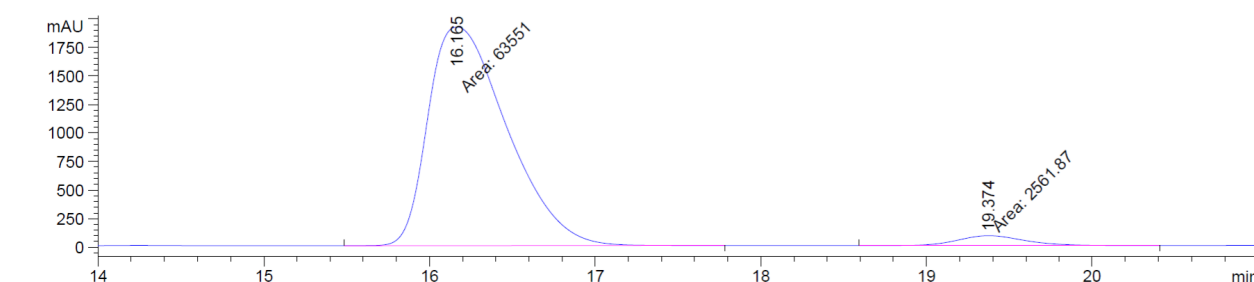

Signal 3: DAD1 C, Sig=210,4 Ref=450,100

| Peak # | RetTime [min] | Type | Width [min] | Area [mAU*s] | Height [mAU] | Area %  |
|--------|---------------|------|-------------|--------------|--------------|---------|
| 1      | 16.165        | MM   | 0.5525      | 6.35510e4    | 1917.15662   | 96.1250 |
| 2      | 19.374        | MM   | 0.4877      | 2561.87378   | 87.55840     | 3.8750  |

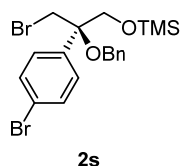

**(R)-2-(benzyloxy)-3-bromo-2-(4-bromophenyl)propoxytrimethylsilane (2s):** Oxetane **1s** (127.7 mg, 0.4 mmol, 1 equiv.) underwent reaction according to General Procedure D to yield **2s** (133.3 mg, 0.28 mmol, 71% yield, 95% yield BRSM). **3s** was determined to be of 91% e.e. by chiral HPLC analysis of the desilylated alcohol (ChiralPak AD-H, 5% *i*-PrOH in hexanes, 1 mL/min,  $t_r(\text{major})=20.2$  min,  $t_r(\text{minor})=23.3$  min). The absolute configuration of **2s** was assigned by analogy to **2t**. **<sup>1</sup>H NMR** (600 MHz, CDCl<sub>3</sub>)  $\delta$  7.53 – 7.49 (m, 2H), 7.39 – 7.27 (m, 7H), 4.44 (d,  $J=10.6$  Hz, 1H), 4.29 (d,  $J=10.5$  Hz, 1H), 4.12 (d,  $J=10.8$  Hz, 1H), 4.09 (d,  $J=9.9$  Hz, 1H), 3.86 (dd,  $J=10.9, 1.0$  Hz, 1H), 3.74 (dd,  $J=10.0, 1.0$  Hz, 1H), 0.01 (s, 9H) ppm; **<sup>13</sup>C NMR** (126 MHz, CDCl<sub>3</sub>)  $\delta$  139.3, 138.1, 131.6, 129.0, 128.5, 127.8 (this peak was revealed upon application of nonstandard exponential apodization), 127.7, 122.1, 79.7, 65.8, 65.1, 35.7, -0.6 ppm; **FT-IR** (thin-film): 3065, 3032, 2955, 2923, 2874, 1589, 1486, 1454, 1425, 1397, 1251, 1159, 1110, 1074, 1009, 872, 841, 750, 735, 696, 621, 557 cm<sup>-1</sup>; **HRMS** (FTMS + p APCI corona) calculated for C<sub>19</sub>H<sub>24</sub>Br<sub>2</sub>O<sub>2</sub>SiNa [M+Na]<sup>+</sup> 492.9805, found 492.9800;  $[\alpha]_D = +50.6^\circ$  (c = 1.0, CHCl<sub>3</sub>).

**Racemic sample:** HPLC (ChiralPak AD-H, 5% *i*-PrOH in hexanes, 1 mL/min, 210 nm)

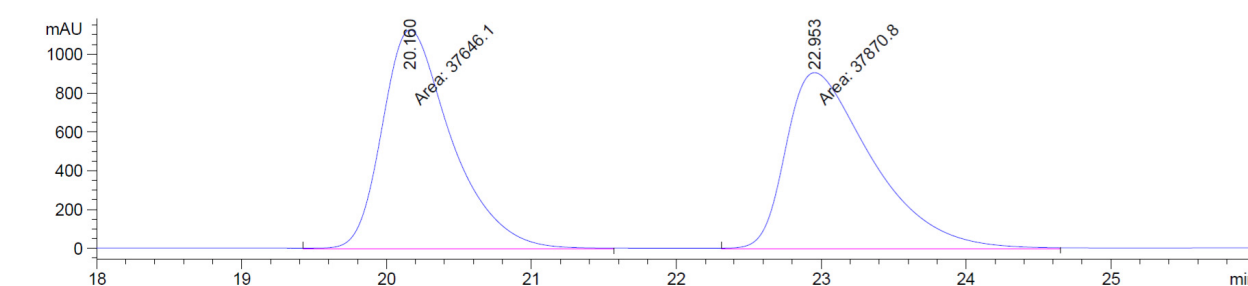

Signal 3: DAD1 C, Sig=210,4 Ref=450,100

| Peak # | RetTime [min] | Type | Width [min] | Area [mAU*s] | Height [mAU] | Area %  |
|--------|---------------|------|-------------|--------------|--------------|---------|
| 1      | 20.160        | MM   | 0.5559      | 3.76461e4    | 1128.75415   | 49.8512 |
| 2      | 22.953        | MM   | 0.6939      | 3.78708e4    | 909.57452    | 50.1488 |

**Enantioenriched sample:** HPLC (ChiralPak AD-H, 5% *i*-PrOH in hexanes, 1 mL/min, 210 nm), 91% e.e.

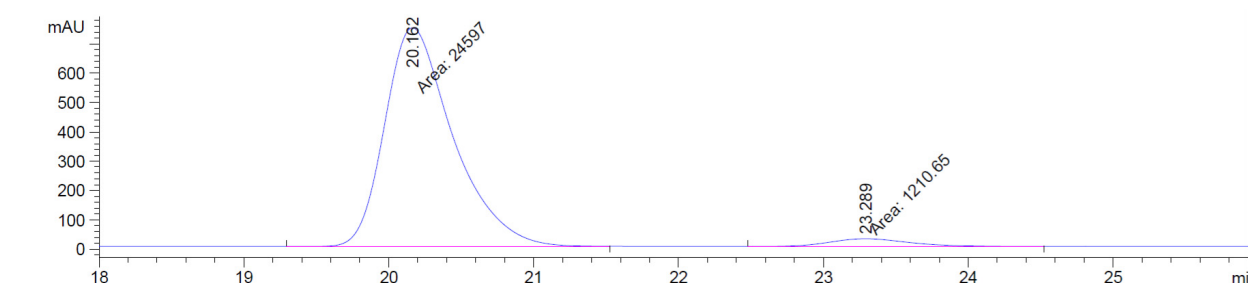

Signal 3: DAD1 C, Sig=210,4 Ref=450,100

| Peak # | RetTime [min] | Type | Width [min] | Area [mAU*s] | Height [mAU] | Area %  |
|--------|---------------|------|-------------|--------------|--------------|---------|
| 1      | 20.162        | MM   | 0.5489      | 2.45970e4    | 746.92047    | 95.3090 |
| 2      | 23.289        | MM   | 0.7187      | 1210.64600   | 28.07631     | 4.6910  |

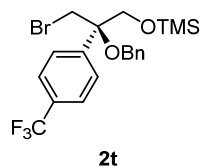

**(R)-(2-(benzyloxy)-3-bromo-2-(4-(trifluoromethyl)phenyl)propoxy)trimethylsilane (2t):**

Oxetane **1t** (123.3 mg, 0.4 mmol, 1 equiv.) underwent reaction according to General Procedure D to yield **2t** (110.4 mg, 0.24 mmol, 60% yield, 85% yield BRSM). **2t** was determined to be of 88% e.e. by chiral HPLC analysis of the desilylated alcohol (ChiralPak AD-H, 5% *i*-PrOH in hexanes, 1 mL/min,  $t_r(\text{major}) = 14.8$  min,  $t_r(\text{minor}) = 17.0$  min).  $^1\text{H NMR}$  (600 MHz,  $\text{CDCl}_3$ )  $\delta$  7.66 – 7.63 (m, 2H), 7.60 – 7.57 (m, 2H), 7.40 – 7.34 (m, 4H), 7.32 – 7.28 (m, 1H), 4.48, (d,  $J = 10.6$  Hz, 1H), 4.31 (d,  $J = 10.5$  Hz, 1H), 4.17 (d,  $J = 10.9$  Hz, 1H), 4.12 (d,  $J = 10.0$  Hz, 1H), 3.89 (dd,  $J = 10.9$ , 1.0 Hz, 1H), 3.77 (dd,  $J = 10.0$ , 1.0 Hz, 1H), 0.00 (s, 9H) ppm;  $^{13}\text{C NMR}$  (126 MHz,  $\text{CDCl}_3$ )  $\delta$  144.5, 138.0, 130.2 (q,  $J = 32.6$  Hz), 128.6, 127.8, 127.8, 127.6, 125.3 (q,  $J = 3.7$  Hz), 124.2 (q,  $J = 272.1$  Hz), 79.9, 66.0, 65.2, 35.5, –0.7 ppm;  $^{19}\text{F NMR}$  (471 MHz,  $\text{CDCl}_3$ )  $\delta$  –62.62 ppm; **FT-IR** (thin-film): 3033, 2957, 2875, 1618, 1498, 1455, 1410, 1327, 1252, 1165, 1111, 1070, 1016, 872, 842, 745, 696, 612, 460  $\text{cm}^{-1}$ ; **HRMS** (FTMS + p APCI corona) calculated for  $\text{C}_{20}\text{H}_{24}\text{BrF}_3\text{O}_2\text{SiNa}$   $[\text{M}+\text{Na}]^+$  483.0573, found 483.0572;  $[\alpha]_D = +37.6^\circ$  ( $c = 1.0$ ,  $\text{CHCl}_3$ ). A crystal



suitable for X-ray diffraction grew spontaneously upon allowing a sample of **2t** that had been concentrated from Et<sub>2</sub>O to stand on the bench, allowing for the assignment of its absolute configuration (see section **SI-X-Ray crystallography** for crystallographic details).

**Racemic sample:** HPLC (ChiralPak AD-H, 5% *i*-PrOH in hexanes, 1 mL/min, 210 nm)

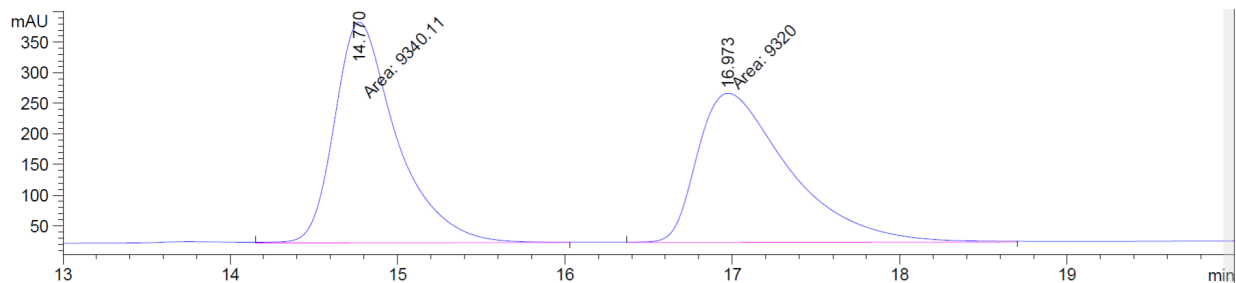

Signal 3: DAD1 C, Sig=210,4 Ref=450,100

| Peak # | RetTime [min] | Type | Width [min] | Area [mAU*s] | Height [mAU] | Area %  |
|--------|---------------|------|-------------|--------------|--------------|---------|
| 1      | 14.770        | MM   | 0.4310      | 9340.11426   | 361.14682    | 50.0539 |
| 2      | 16.973        | MM   | 0.6361      | 9320.00391   | 244.19301    | 49.9461 |

**Enantioenriched sample:** HPLC (ChiralPak AD-H, 5% *i*-PrOH in hexanes, 1 mL/min, 210 nm), 88% e.e.

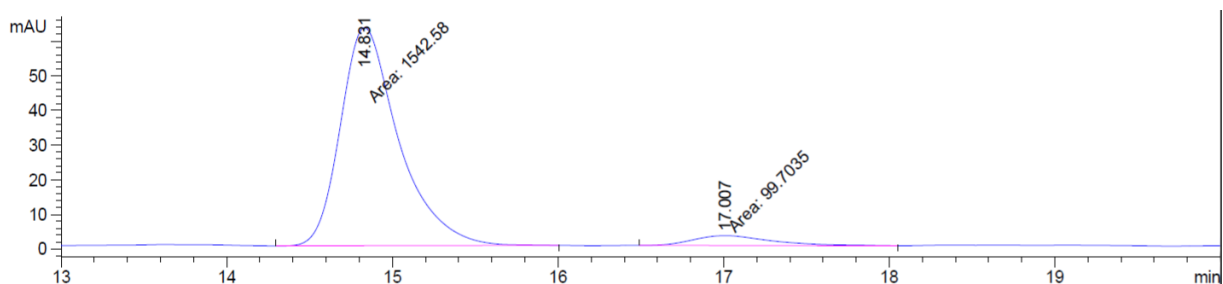

Signal 3: DAD1 C, Sig=210,4 Ref=450,100

| Peak # | RetTime [min] | Type | Width [min] | Area [mAU*s] | Height [mAU] | Area %  |
|--------|---------------|------|-------------|--------------|--------------|---------|
| 1      | 14.831        | MM   | 0.4082      | 1542.58252   | 62.98191     | 93.9290 |
| 2      | 17.007        | MM   | 0.5693      | 99.70345     | 2.91901      | 6.0710  |

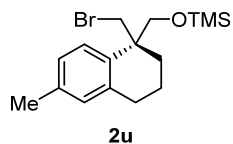

**(S)-((1-(bromomethyl)-6-methyl-1,2,3,4-tetrahydronaphthalen-1-yl)methoxy)trimethylsilane (**2u**):** Oxetane **1u** (75 mg, 0.4 mmol, 1 equiv.) underwent reaction according to General Procedure B with the following modifications: 7.5 mol% of catalyst **3a** was used, the reaction was run at  $-65\text{ }^{\circ}\text{C}$ , and 3 M HCl was required for the deprotection of the silyl ether for HPLC analysis. Since trace starting material remained in the crude product, it was purified by flash column chromatography to yield **2u** (121.6 mg, 0.36 mmol, 89% yield). **2u** was determined to be of 88% e.e. by chiral HPLC analysis of the deprotected alcohol (ChiralPak AS-H, 5% *i*-PrOH in hexanes, 1 mL/min,  $t_r(\text{major}) = 15.3\text{ min}$ ,  $t_r(\text{minor}) = 10.4\text{ min}$ ). The absolute configuration of this compound was assigned by X-ray crystallographic analysis of its triazole derivative **26u** (see below). <sup>1</sup>H NMR (600 MHz, CDCl<sub>3</sub>)  $\delta$  7.32 (d,  $J = 8.0\text{ Hz}$ , 1H), 7.00 – 6.97 (m, 1H), 6.92 (s, 1H), 3.83 (dd,  $J = 10.3, 0.9\text{ Hz}$ , 1H), 3.74 –

3.68 (m, 2H), 3.56 (dd,  $J = 10.2, 1.0$  Hz, 1H), 2.80 – 2.65 (m, 2H), 2.29 (s, 3H), 1.96 (ddd,  $J = 12.7, 10.2, 2.9$  Hz, 1H), 1.87 – 1.69 (m, 3H), 0.09 (s, 9H) ppm;  $^{13}\text{C}$  NMR (151 MHz,  $\text{CDCl}_3$ )  $\delta$  138.1, 136.2, 135.2, 130.0, 127.5, 126.8, 68.3, 42.8, 42.6, 30.5, 28.9, 21.1, 19.2, -0.5 ppm; FT-IR (thin-film) 3004, 2936, 2864, 1614, 1498, 1458, 1250, 1096, 1079, 1023, 872, 836, 746, 704, 639, 562  $\text{cm}^{-1}$ ; HRMS (FTMS + p CI) calculated for  $\text{C}_{16}\text{H}_{24}\text{BrOSi}$   $[\text{M}-\text{H}]^+$  339.0774, found 339.0773;  $[\alpha]_{\text{D}} = +38.8^\circ$  ( $c = 1.0, \text{CHCl}_3$ ).

**Racemic sample:** HPLC (ChiralPak AS-H, 5% *i*-PrOH in hexanes, 1 mL/min, 210 nm)

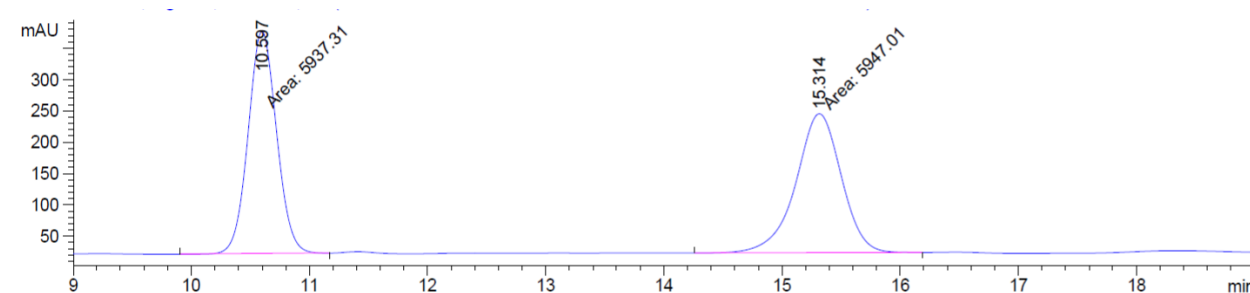

Signal 3: DAD1 C, Sig=210,4 Ref=450,100

| Peak # | RetTime [min] | Type | Width [min] | Area [mAU*s] | Height [mAU] | Area %  |
|--------|---------------|------|-------------|--------------|--------------|---------|
| 1      | 10.597        | MM   | 0.2789      | 5937.31055   | 354.83820    | 49.9592 |
| 2      | 15.314        | MM   | 0.4474      | 5947.01416   | 221.55240    | 50.0408 |

**Enantioenriched sample:** HPLC (ChiralPak AS-H, 5% *i*-PrOH in hexanes, 1 mL/min, 210 nm), 88% e.e.

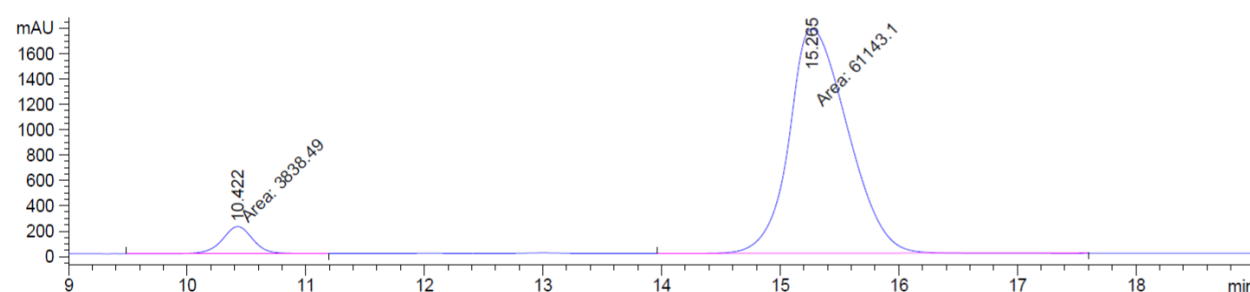

Signal 3: DAD1 C, Sig=210,4 Ref=450,100

| Peak # | RetTime [min] | Type | Width [min] | Area [mAU*s] | Height [mAU] | Area %  |
|--------|---------------|------|-------------|--------------|--------------|---------|
| 1      | 10.422        | MM   | 0.2985      | 3838.49194   | 214.35403    | 5.9070  |
| 2      | 15.265        | MM   | 0.5743      | 6.11431e4    | 1774.39746   | 94.0930 |

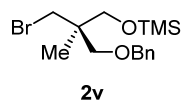

**(R)-3-(benzyloxy)-2-(bromomethyl)-2-methylpropoxytrimethylsilane (2v):** Oxetane **1v** (76.9 mg, 0.4 mmol, 1 equiv.) underwent reaction according to General Procedure B with the following modifications: 7.5 mol% of catalyst **3a** was used, the reaction was run for 48 hours, and 3 M HCl was required for deprotection of the silyl ether for HPLC analysis. The reaction yielded **2v** (133.5 mg, 0.39 mmol, 97% yield). **2v** was determined to be of 67% e.e. by chiral HPLC analysis of the desilylated alcohol (ChiralPak AS-H, 5% *i*-PrOH in hexanes, 1 mL/min,  $t_{\text{r}}(\text{major}) = 13.7$  min,  $t_{\text{r}}(\text{minor}) = 11.9$  min).

The absolute configuration of this compound was assigned by analogy to chlorhydrin analogue **28** formed via the opening of **1v** with TMSCl catalyzed by squaramide **3a** (see below). <sup>1</sup>H NMR (600 MHz, CDCl<sub>3</sub>) δ 7.37 – 7.30 (m, 4H), 7.30 – 7.26 (m, 1H), 4.50 (s, 2H), 3.50 – 3.43 (m, 4H), 3.35 (s, 2H), 1.01 (s, 3H), 0.09 (s, 9H) ppm; <sup>13</sup>C NMR (126 MHz, CDCl<sub>3</sub>) δ 138.7, 128.4, 127.6, 127.5, 73.5, 73.2, 65.5, 41.2, 40.0, 18.7, -0.4 ppm; FT-IR (thin-film): 2957, 2901, 2860, 1497, 1474, 1427, 1386, 1364, 1251, 1086, 1028, 874, 840, 746, 697, 661, 608 cm<sup>-1</sup>; HRMS (FTMS + p CI) calculated for C<sub>15</sub>H<sub>26</sub>BrO<sub>2</sub>Si [M+H]<sup>+</sup> 345.0880, found 345.0878; [α]<sub>D</sub> = -21° (c = 1.0, CHCl<sub>3</sub>).

**Racemic sample:** HPLC (ChiralPak AS-H, 5% *i*-PrOH in hexanes, 1 mL/min, 210 nm)

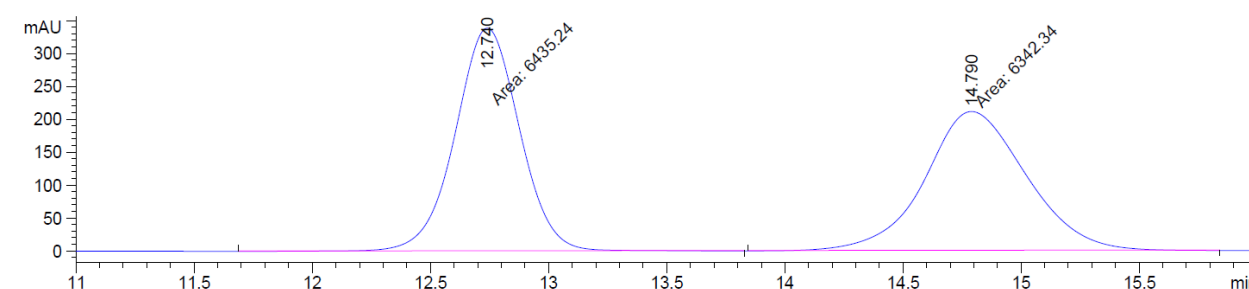

Signal 3: DAD1 C, Sig=210,4 Ref=450,100

| Peak # | RetTime [min] | Type | Width [min] | Area [mAU*s] | Height [mAU] | Area %  |
|--------|---------------|------|-------------|--------------|--------------|---------|
| 1      | 12.740        | MM   | 0.3165      | 6435.23682   | 338.83606    | 50.3635 |
| 2      | 14.790        | MM   | 0.5000      | 6342.34473   | 211.43150    | 49.6365 |

**Enantioenriched sample:** HPLC (ChiralPak AS-H, 5% *i*-PrOH in hexanes, 1 mL/min, 210 nm), 67% e.e.

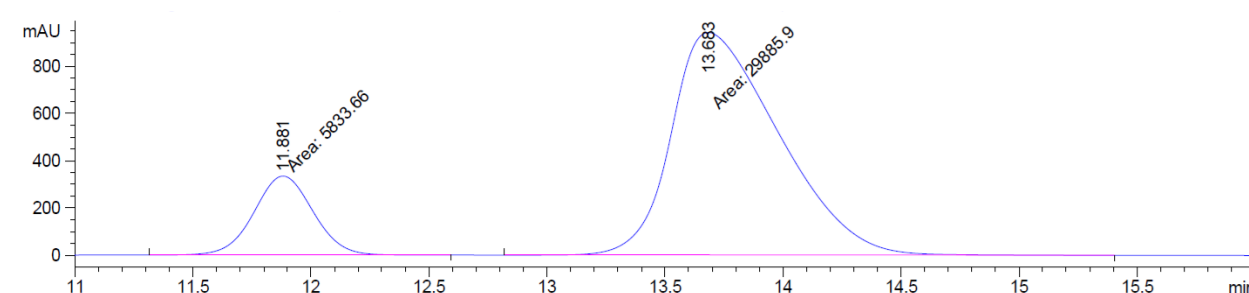

Signal 3: DAD1 C, Sig=210,4 Ref=450,100

| Peak # | RetTime [min] | Type | Width [min] | Area [mAU*s] | Height [mAU] | Area %  |
|--------|---------------|------|-------------|--------------|--------------|---------|
| 1      | 11.881        | MM   | 0.2908      | 5833.66357   | 334.31403    | 16.3318 |
| 2      | 13.683        | MM   | 0.5283      | 2.98859e4    | 942.84674    | 83.6682 |

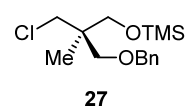

**(R)-3-(benzyloxy)-2-(chloromethyl)-2-methylpropoxytrimethylsilane (27):** Oxetane **1v** (76.9 mg, 0.4 mmol, 1 equiv.) and squaramide **3a** (20.5 mg, 0.03 mmol, 0.075 equiv.) were weighed into an oven-dried 2-dram vial equipped with a magnetic stir bar and closed with a screw-cap containing a rubber septum. The compounds were dissolved in *t*-BuOMe (4 mL, 0.1 M) and the headspace of the vial was flushed with nitrogen for 15 seconds after which the vial was cooled to -78 °C in a dry

ice-acetone bath, allowing 15 minutes for the temperature to equilibrate. Then TMSCl was added (0.1 mL, 0.8 mmol, 2 equiv.). The reaction was allowed to continue stirring at -78 °C for 30 minutes, after which it was transferred to a -30 °C freezer and allowed to continue for 5 days without stirring. The reaction was then quenched by the addition of a 1:1 solution of *i*-PrOH-Et<sub>3</sub>N (0.4 mL). After an additional 5 minutes at -30 °C, the reaction was diluted with Et<sub>2</sub>O and saturated aqueous NaHCO<sub>3</sub>. The organic layer was removed, and the aqueous layer was extracted 3x with Et<sub>2</sub>O. The combined organic layers were washed with brine, dried over MgSO<sub>4</sub>, filtered, concentrated under vacuum, and purified by flash column chromatography to yield **27** (35.5 mg, 0.12 mmol, 30% yield). The e.e. and absolute configuration of this compound was assigned by its desilylated derivative **28** (see below). <sup>1</sup>H NMR (600 MHz, CDCl<sub>3</sub>) δ 7.38 – 7.31 (m, 4H), 7.32 – 7.26 (m, 1H), 4.51 (s, 2H), 3.60 – 3.54 (m, 2H), 3.50 – 3.45 (m, 2H), 3.37 – 3.32 (m, 2H), 1.00 (s, 3H), 0.10 (s, 9H) ppm; <sup>13</sup>C NMR (126 MHz, CDCl<sub>3</sub>) δ 138.8, 128.4, 127.6, 127.5, 73.5, 72.7, 65.0, 49.2, 41.9, 17.8, -0.5 ppm; FT-IR (thin-film): 3031, 2956, 2901, 2862, 1726, 1497, 1475, 1454, 1434, 1408, 1364, 1251, 1206, 1086, 1028, 872, 839, 746, 733, 697, 608 cm<sup>-1</sup>; HRMS (FTMS + p ESI) calculated for C<sub>15</sub>H<sub>26</sub>ClO<sub>2</sub>Si [M+H]<sup>+</sup> 301.1385, found 301.1387; [α]<sub>D</sub> = -1.6° (c = 1.0, CHCl<sub>3</sub>).

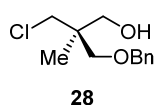

**(S)-3-(benzyloxy)-2-(chloromethyl)-2-methylpropan-1-ol (28):** Silyl-protected chlorohydrin **27** (35.5 mg, 0.12 mmol, 1 equiv.) was dissolved in THF (1.2 mL, 0.1 M) and cooled to 0 °C in an ice-bath. A solution of tetrabutylammonium fluoride (0.18 mL of a 1 M solution in THF, 0.18 mmol, 1 equiv.) was added, and then the ice-bath was removed allowing the reaction to warm to room temperature. After 45 minutes at room temperature, the reaction was quenched by the addition of sat. aq. NaHCO<sub>3</sub> and diluted with Et<sub>2</sub>O. The organic layer was removed and the aqueous layer was extracted 3x with Et<sub>2</sub>O. The combined organic layers were washed with brine, dried over MgSO<sub>4</sub>, filtered, concentrated, and purified by flash column chromatography to yield **28** (22.8 mg, 0.10 mmol, 84% yield). **28** was determined to be of 69% e.e. by chiral HPLC analysis (ChiralPak AS-H, 5% *i*-PrOH in hexanes, 1 mL/min, t<sub>r</sub>(major)= 14.6 min, t<sub>r</sub>(minor)= 12.9 min). The spectral data and sign of the optical rotation were consistent with previous literature reports for the (S)-enantiomer of this compound<sup>21,22</sup>, allowing the assignment of the absolute configuration. <sup>1</sup>H NMR (600 MHz, CDCl<sub>3</sub>) δ 7.38 – 7.34 (m, 2H), 7.31 (m, 3H), 4.53 (s, 2H), 3.72 (d, *J* = 10.9 Hz, 1H), 3.66 – 3.61 (m, 2H), 3.56 (dd, *J* = 11.2, 1.1 Hz, 1H), 3.51 (dd, *J* = 9.1, 1.1 Hz, 1H), 3.44 (d, *J* = 9.1 Hz, 1H), 2.52 (br, 1H) 0.93 (s, 3H) ppm; [α]<sub>D</sub> = +3.8° (c = 1.0, CHCl<sub>3</sub>).

**Racemic sample:** HPLC (ChiralPak AS-H, 5% *i*-PrOH in hexanes, 1 mL/min, 210 nm)

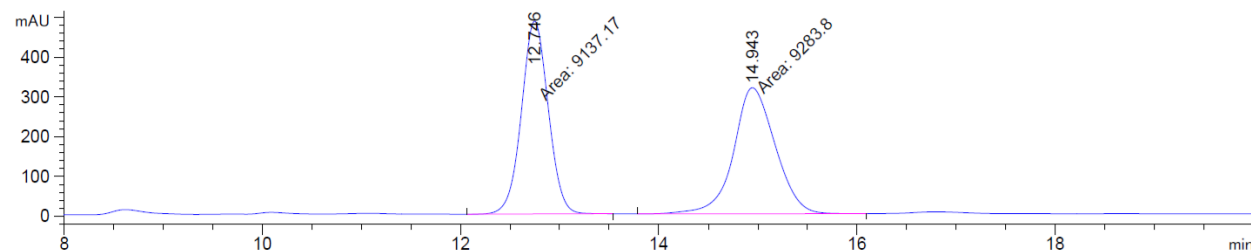

Signal 3: DAD1 C, Sig=210,4 Ref=450,100

| Peak # | RetTime [min] | Type | Width [min] | Area [mAU*s] | Height [mAU] | Area %  |
|--------|---------------|------|-------------|--------------|--------------|---------|
| 1      | 12.746        | MM   | 0.3139      | 9137.17383   | 485.07922    | 49.6020 |
| 2      | 14.943        | MM   | 0.4880      | 9283.79785   | 317.05579    | 50.3980 |

**Enantioenriched sample:** HPLC (ChiralPak AS-H, 5% *i*-PrOH in hexanes, 1 mL/min, 210 nm), 69% e.e.

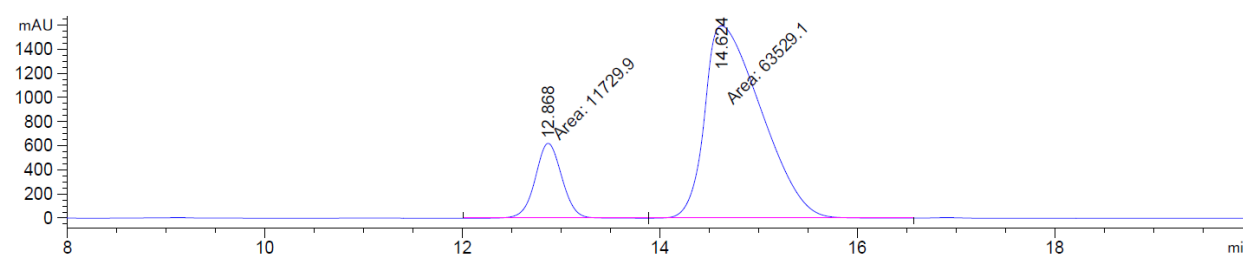

Signal 3: DAD1 C, Sig=210,4 Ref=450,100

| Peak # | RetTime [min] | Type | Width [min] | Area [mAU*s] | Height [mAU] | Area %  |
|--------|---------------|------|-------------|--------------|--------------|---------|
| 1      | 12.868        | MM   | 0.3145      | 1.17299e4    | 621.63062    | 15.5861 |
| 2      | 14.624        | MM   | 0.6634      | 6.35291e4    | 1595.98853   | 84.4139 |

**Procedures and characterization data for derivatizations of products:**

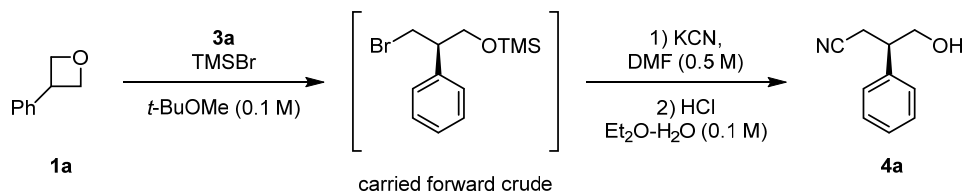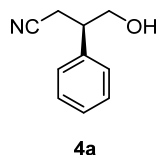

**(R)-4-hydroxy-3-phenylbutanenitrile (4a):** Oxetane **1a** (53.7 mg, 0.4 mmol, 1 equiv.) underwent reaction according to General Procedure B to yield **2a**, which was immediately carried forward crude. The crude alkyl bromide **2a** was dissolved in DMF (0.8 mL, 0.5 M) and KCN (78 mg, 1.2 mmol, 3 equiv.) was added. The solution was heated to 50 °C for three days after which it was cooled to room temperature and diluted with Et<sub>2</sub>O and saturated aqueous NaHCO<sub>3</sub>. The aqueous layer was removed, and the organic layer was washed 2x with saturated aqueous NaHCO<sub>3</sub> to ensure removal of any unreacted KCN. The organic layer was then concentrated under vacuum, and the resulting oil was dissolved in Et<sub>2</sub>O (2 mL, 0.2 M) and aqueous 1 M HCl (2 mL) was added. The biphasic solution was stirred vigorously until TLC indicated complete conversion of the TMS-protected product to the free alcohol (~30 minutes) and then the reaction was diluted with Et<sub>2</sub>O and water. The organic layer was removed and the aqueous layer was extracted 3x with Et<sub>2</sub>O. The combined organic layers were washed with brine, dried over MgSO<sub>4</sub>, filtered, concentrated under vacuum, and purified by flash column chromatography to yield nitrile **4a** (40.3 mg, 0.25 mmol, 62% yield from 3-phenyloxetane). **4a** was determined to be of 97% e.e. by chiral HPLC analysis (ChiralPak AS-H, 10% *i*-PrOH in hexanes, 1 mL/min, *t*<sub>r</sub>(major)= 21.7 min, *t*<sub>r</sub>(minor)= 26.8 min). The absolute configuration of **4a** was assigned based on that of **2a**. The spectral data and the sign of the optical rotation were consistent with a previous literature report<sup>10</sup>: <sup>1</sup>H NMR (600 MHz, CDCl<sub>3</sub>) δ 7.40 – 7.36 (m, 2H), 7.34 – 7.30 (m, 1H), 7.28 – 7.25 (m, 2H), 3.95 (dd, *J* = 10.9, 5.7 Hz, 1H), 3.88 (dd, *J* = 10.9, 6.9 Hz, 1H), 3.20 (p, *J* = 6.6 Hz, 1H), 2.86 (dd, *J* = 16.8, 6.4 Hz, 1H), 2.73 (dd, *J* = 16.8, 7.6 Hz, 1H), 1.53 (s, 1H) ppm; [α]<sub>D</sub> = –30.0° (c = 1.0, CHCl<sub>3</sub>).

**Racemic sample:** HPLC (ChiralPak AS-H, 10% *i*-PrOH in hexanes, 1 mL/min, 210 nm)

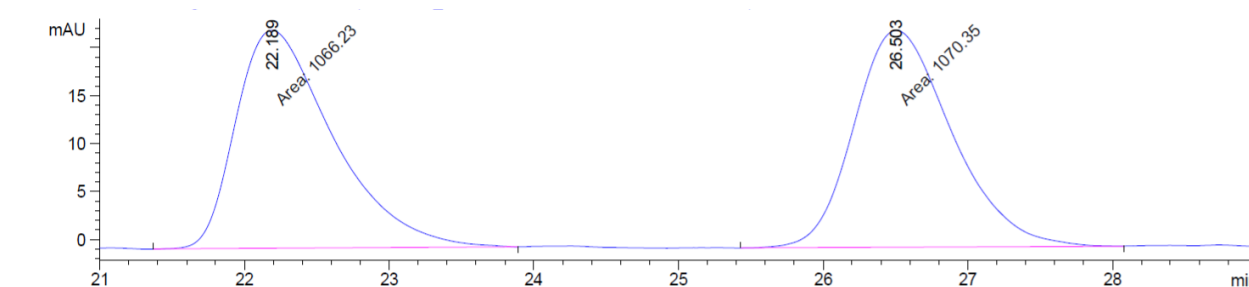

Signal 3: DAD1 C, Sig=210,4 Ref=450,100

| Peak # | RetTime [min] | Type | Width [min] | Area [mAU*s] | Height [mAU] | Area %  |
|--------|---------------|------|-------------|--------------|--------------|---------|
| 1      | 22.189        | MM   | 0.7801      | 1066.22876   | 22.77945     | 49.9035 |
| 2      | 26.503        | MM   | 0.7869      | 1070.35254   | 22.67056     | 50.0965 |

**Enantioenriched sample:** HPLC (ChiralPak AS-H, 10% *i*-PrOH in hexanes, 1 mL/min, 210 nm), 97% e.e.

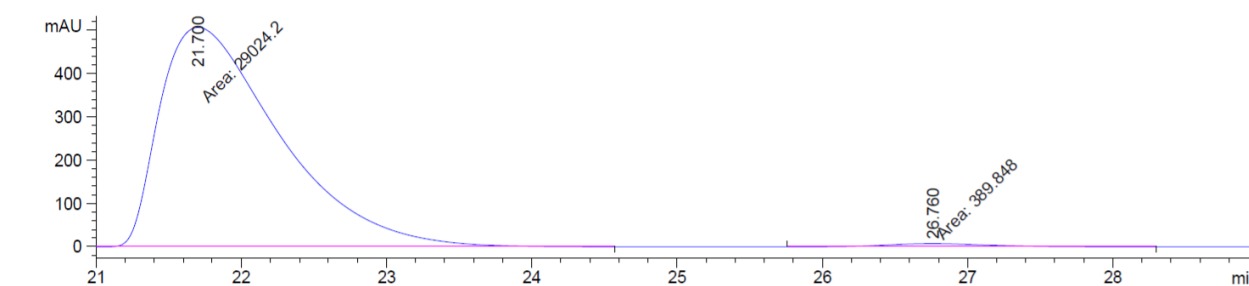

Signal 3: DAD1 C, Sig=210,4 Ref=450,100

| Peak # | RetTime [min] | Type | Width [min] | Area [mAU*s] | Height [mAU] | Area %  |
|--------|---------------|------|-------------|--------------|--------------|---------|
| 1      | 21.700        | MM   | 0.9540      | 2.90242e4    | 507.05762    | 98.6746 |
| 2      | 26.760        | MM   | 0.8620      | 389.84848    | 7.53753      | 1.3254  |

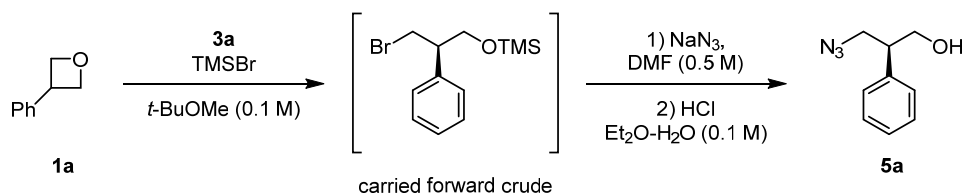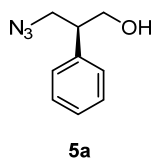

**(S)-3-azido-2-phenylpropan-1-ol (5a):** Oxetane **1a** (53.7 mg, 0.4 mmol, 1 equiv.) underwent reaction according to General Procedure B to yield **2a**, which was immediately carried forward crude. The crude alkyl bromide **2a** was dissolved in DMF (0.8 mL, 0.5 M) and NaN<sub>3</sub> (104 mg, 1.6 mmol, 4 equiv.) was added. The solution was allowed to stir at room temperature for three days after which it was diluted with Et<sub>2</sub>O and saturated aqueous NaHCO<sub>3</sub>. The aqueous layer was removed, and the organic layer was washed 2x with saturated aqueous NaHCO<sub>3</sub> to ensure removal of any unreacted NaN<sub>3</sub>. The organic layer was then concentrated under vacuum, and the resulting oil was dissolved in Et<sub>2</sub>O (2 mL, 0.2 M) and aqueous 1 M HCl (2 mL) was added. The biphasic solution was stirred vigorously until TLC indicated complete conversion of the TMS-protected product to the free alcohol (~30 minutes) and then the reaction was diluted with Et<sub>2</sub>O and water. The organic layer was removed and the aqueous layer was extracted 3x with Et<sub>2</sub>O. The combined organic layers were washed with brine, dried over MgSO<sub>4</sub>, filtered, concentrated under vacuum, and purified by flash column chromatography to yield **5a** (58.2 mg, 0.33 mmol, 82% yield from 3-phenyloxetane). **5a** was determined to be of 97% e.e. by chiral HPLC analysis (ChiralPak AS-H, 5% *i*-PrOH in hexanes, 1 mL/min, *t*<sub>r</sub>(major)= 17.0 min, *t*<sub>r</sub>(minor)= 15.8 min). The absolute configuration of **5a** was assigned based on that of **2a**. The spectral data and the sign of the optical rotation were consistent with a previous literature report<sup>10</sup>: <sup>1</sup>H NMR (600 MHz, CDCl<sub>3</sub>) δ 7.38 – 7.34 (m, 2H), 7.31 – 7.28 (m, 1H), 7.26 – 7.24 (m, 2H), 3.93 – 3.86 (m, 2H), 3.72 – 3.62 (m, 2H), 3.08 (p, *J* = 6.6 Hz, 1H), 1.50 (s, 1H) ppm; [α]<sub>D</sub> = –18.0° (c = 1.0, CHCl<sub>3</sub>).

**Racemic sample:** HPLC (ChiralPak AS-H, 5% *i*-PrOH in hexanes, 1 mL/min, 210 nm)

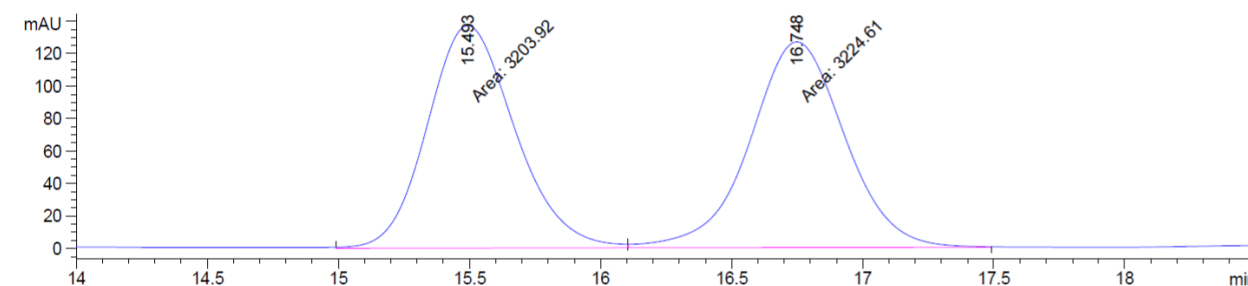

Signal 3: DAD1 C, Sig=210,4 Ref=450,100

| Peak # | RetTime [min] | Type | Width [min] | Area [mAU*s] | Height [mAU] | Area %  |
|--------|---------------|------|-------------|--------------|--------------|---------|
| 1      | 15.493        | MF   | 0.3887      | 3203.92285   | 137.39435    | 49.8391 |
| 2      | 16.748        | FM   | 0.4230      | 3224.61182   | 127.06793    | 50.1609 |

**Enantioenriched sample:** HPLC (ChiralPak AS-H, 5% *i*-PrOH in hexanes, 1 mL/min, 210 nm), 97% e.e.

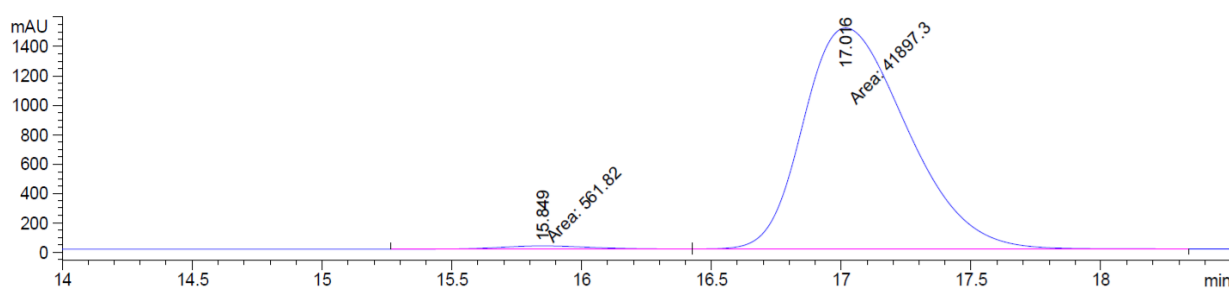

Signal 3: DAD1 C, Sig=210,4 Ref=450,100

| Peak # | RetTime [min] | Type | Width [min] | Area [mAU*s] | Height [mAU] | Area %  |
|--------|---------------|------|-------------|--------------|--------------|---------|
| 1      | 15.849        | MF   | 0.4238      | 561.81952    | 22.09209     | 1.3232  |
| 2      | 17.016        | FM   | 0.4641      | 4.18973e4    | 1504.69788   | 98.6768 |

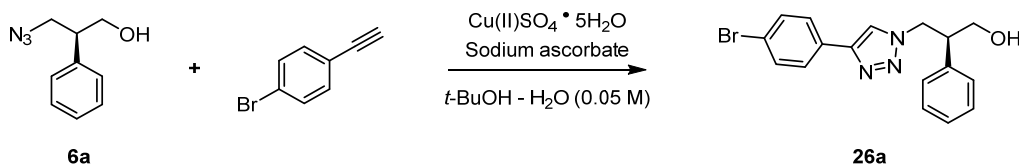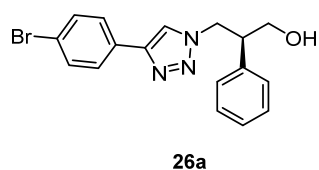

**(S)-3-(4-(4-bromophenyl)-1H-1,2,3-triazol-1-yl)-2-phenylpropan-1-ol (26a):**

Azide **5a** (30 mg, 0.17 mmol, 1 equiv.) was dissolved in a 1 : 1 mixture of *t*-BuOH and water (1.69 mL of each solvent, 0.05 M overall). Then 1-bromo-4-ethynylbenzene (37 mg, 0.20 mmol, 1.2 equiv.), copper(II) sulfate pentahydrate (10.6 mg, 0.042 mmol, 0.25 equiv.), and sodium ascorbate (17 mg, 0.085 mmol, 0.5 equiv.) were added and the reaction was allowed to continue overnight at room temperature with vigorous stirring. The following day, the reaction was diluted with EtOAc and water. The organic layer was removed, and the aqueous layer was extracted 3x with EtOAc. The combined organic layers were washed with brine, dried over Na<sub>2</sub>SO<sub>4</sub>, filtered, concentrated, and purified by flash column chromatography to yield triazole **26a** (61.0 mg, 0.17 mmol, 100% yield). **26a** was determined to be of 97% e.e. by chiral HPLC analysis (ChiralCel OJ-H, 30% *i*-PrOH in hexanes, 1 mL/min, *t*<sub>r</sub>(major)= 16.4 min, *t*<sub>r</sub>(minor)= 11.7 min). **<sup>1</sup>H NMR** (600 MHz, CDCl<sub>3</sub>) δ 7.58 (d, *J* = 8.5 Hz, 2H), 7.50 (d, *J* = 8.5 Hz, 2H), 7.44 (s, 1H), 7.32 (t, *J* = 7.2 Hz, 2H), 7.30 – 7.25 (m, 1H), 7.17 (d, *J* = 6.8 Hz, 2H), 4.88 (dd, *J* = 13.8, 6.8 Hz, 1H), 4.65 (dd, *J* = 13.9, 7.4 Hz, 1H), 3.87 (d, *J* = 5.9 Hz, 2H), 3.43 (p, *J* = 6.5 Hz, 1H), 2.63 – 2.46 (br, 1H) ppm; **<sup>13</sup>C NMR** (126 MHz, CDCl<sub>3</sub>) δ 146.5, 138.6, 132.1, 129.5, 129.1, 128.0, 127.9, 127.3, 122.1, 120.8, 63.7, 52.3, 48.7 ppm; **FT-IR** (thin-film): 3354 (br), 3133, 3087, 3063, 3030, 2929, 2874, 1495, 1481, 1454, 1401, 1360, 1226, 1193, 1069, 1049, 1011, 975, 908, 819, 764, 732, 700, 543, 514 cm<sup>-1</sup>; **HRMS** (ESI-TOF) calculated for C<sub>17</sub>H<sub>17</sub>BrN<sub>3</sub>O [M+H]<sup>+</sup> 358.0550, found 358.0548; [α]<sub>D</sub> = -65.8° (c = 1.0, CHCl<sub>3</sub>). A crystal suitable for X-ray diffraction of the HCl salt of **26a** was grown by vapor diffusion of an ethereal solution of HCl into a solution of triazole **26a** in diethyl ether, allowing for the assignment of the absolute configuration of **2a** (see section **SI-X-Ray crystallography** for crystallographic details).



**Racemic sample:** HPLC (ChiralCel OJ-H, 30% *i*-PrOH in hexanes, 1 mL/min, 210 nm)

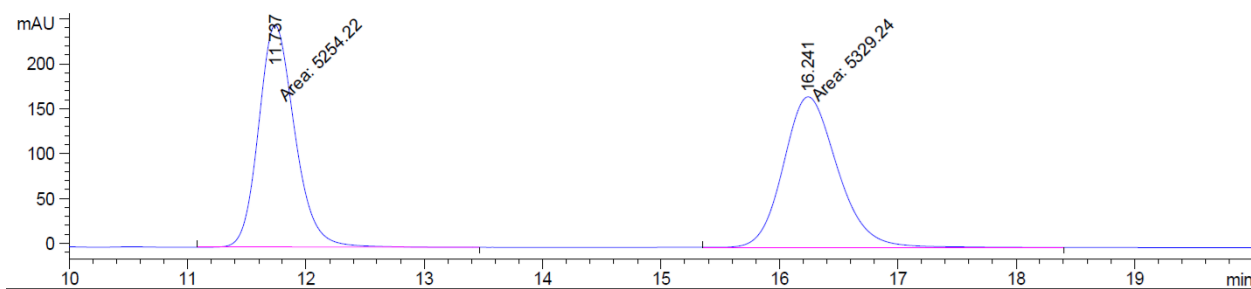

Signal 3: DAD1 C, Sig=210,4 Ref=450,100

| Peak # | RetTime [min] | Type | Width [min] | Area [mAU*s] | Height [mAU] | Area %  |
|--------|---------------|------|-------------|--------------|--------------|---------|
| 1      | 11.737        | MM   | 0.3544      | 5254.22461   | 247.06450    | 49.6456 |
| 2      | 16.241        | MM   | 0.5308      | 5329.23682   | 167.33211    | 50.3544 |

**Enantioenriched sample:** HPLC (ChiralCel OJ-H, 30% *i*-PrOH in hexanes, 1 mL/min, 210 nm), 97% e.e.

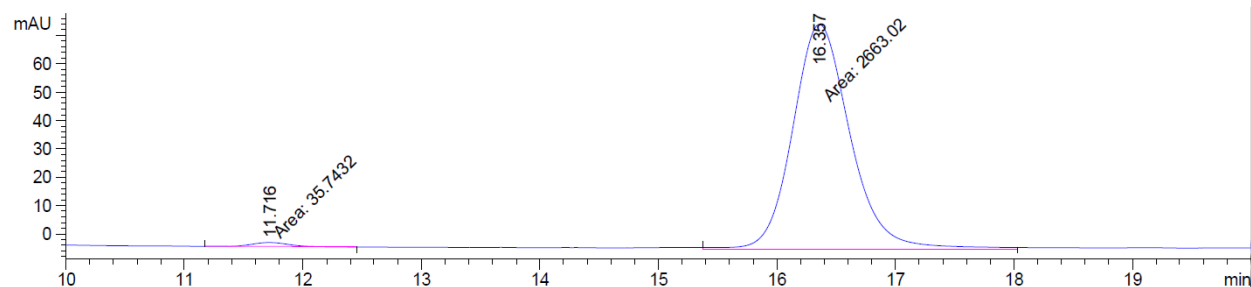

Signal 3: DAD1 C, Sig=210,4 Ref=450,100

| Peak # | RetTime [min] | Type | Width [min] | Area [mAU*s] | Height [mAU] | Area %  |
|--------|---------------|------|-------------|--------------|--------------|---------|
| 1      | 11.716        | MM   | 0.3949      | 35.74317     | 1.50861      | 1.3244  |
| 2      | 16.357        | MM   | 0.5608      | 2663.02222   | 79.14651     | 98.6756 |

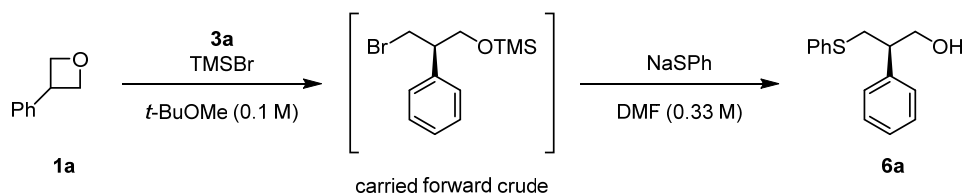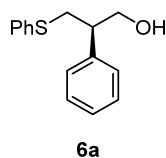

**(R)-2-phenyl-3-(phenylthio)propan-1-ol (6a):** Oxetane **1a** (53.7 mg, 0.4 mmol, 1 equiv.) underwent reaction according to General Procedure B to yield **2a** which was immediately carried forward crude. The crude alkyl bromide **2a** was dissolved in DMF (1.2 mL, 0.33 M) and NaSPh (79 mg, 0.6 mmol, 1.5 equiv.) was added. The solution was allowed to stir at room temperature overnight, after which it was diluted with Et<sub>2</sub>O and saturated aqueous NaHCO<sub>3</sub>. The aqueous layer was removed, and the organic layer was washed 2x with saturated aqueous NaHCO<sub>3</sub>, then washed with brine, dried over MgSO<sub>4</sub>, filtered, and concentrated. An NMR of the crude product revealed a mixture of silylated and desilylated material, so the crude oil was dissolved in Et<sub>2</sub>O (2 mL, 0.2 M) and aqueous 2 M HCl (2 mL) was added. The biphasic solution was stirred vigorously until TLC indicated complete conversion of the TMS-protected product to the free alcohol (~1 hour) and then the reaction was diluted with Et<sub>2</sub>O and water. The aqueous layer was removed, and the organic layer was washed with saturated aqueous NaHCO<sub>3</sub> followed by brine, dried over MgSO<sub>4</sub>, filtered, concentrated under vacuum, and purified by flash column chromatography to yield thioether **6a** (87.2 mg, 0.36 mmol, 89% yield from 3-phenyloxetane). **6a** was determined to be of 97% e.e. by chiral HPLC analysis (ChiralPak AD-H, 5% *i*-PrOH in hexanes, 1 mL/min, t<sub>r</sub>(major)= 17.9 min, t<sub>r</sub>(minor)= 19.3 min). The absolute configuration of **6a** was assigned based on that of **2a**. <sup>1</sup>H NMR (600 MHz, CDCl<sub>3</sub>) δ 7.37 – 7.31 (m, 4H), 7.30 – 7.26 (m, 3H), 7.25 – 7.21 (m, 2H), 7.21 – 7.16 (m, 1H), 3.96 – 3.89 (m, 2H), 3.34 (dd, *J* = 13.1, 7.8 Hz, 1H), 3.24 (dd, *J* = 13.1, 6.9 Hz, 1H), 3.07 (p, *J* = 6.7 Hz, 1H), 1.61 – 1.36 (br, 1H) ppm; <sup>13</sup>C NMR (151 MHz, CDCl<sub>3</sub>) δ 141.0, 136.3, 129.3, 129.0, 128.8, 128.0, 127.3, 126.1, 66.1, 47.5, 36.2 ppm; FT-IR (thin-film): 3364 (br), 3058, 3027, 2923, 2873, 1582, 1494, 1480, 1452, 1438, 1087, 1052, 1024, 906, 736, 689, 537, 473 cm<sup>-1</sup>; HRMS (FTMS + p EI) calculated for C<sub>15</sub>H<sub>16</sub>OS • [M•]<sup>+</sup> 244.0916, found 244.0915; [α]<sub>D</sub> = -54.6° (c = 1.0, CHCl<sub>3</sub>).

**Racemic sample:** HPLC (ChiralPak AD-H, 5% *i*-PrOH in hexanes, 1 mL/min, 210 nm)

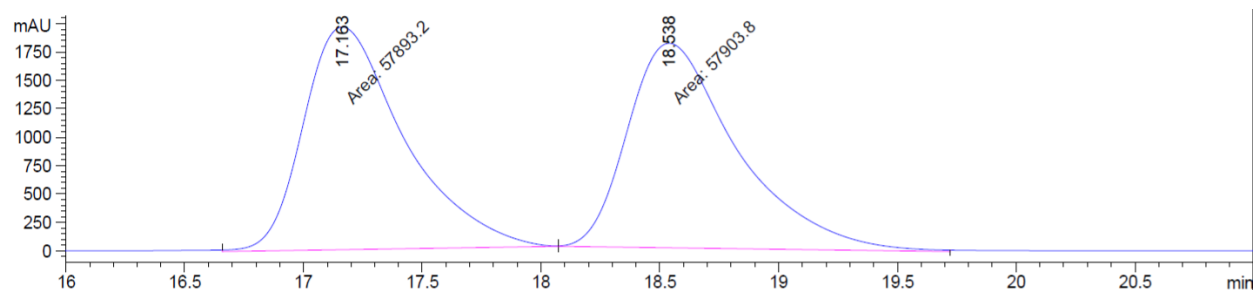

Signal 3: DAD1 C, Sig=210,4 Ref=450,100

| Peak # | RetTime [min] | Type | Width [min] | Area [mAU*s] | Height [mAU] | Area %  |
|--------|---------------|------|-------------|--------------|--------------|---------|
| 1      | 17.163        | MM   | 0.4919      | 5.78932e4    | 1961.43469   | 49.9954 |
| 2      | 18.538        | MM   | 0.5355      | 5.79038e4    | 1802.13635   | 50.0046 |

**Enantioenriched sample:** HPLC (ChiralPak AD-H, 5% *i*-PrOH in hexanes, 1 mL/min, 210 nm), 97% e.e.

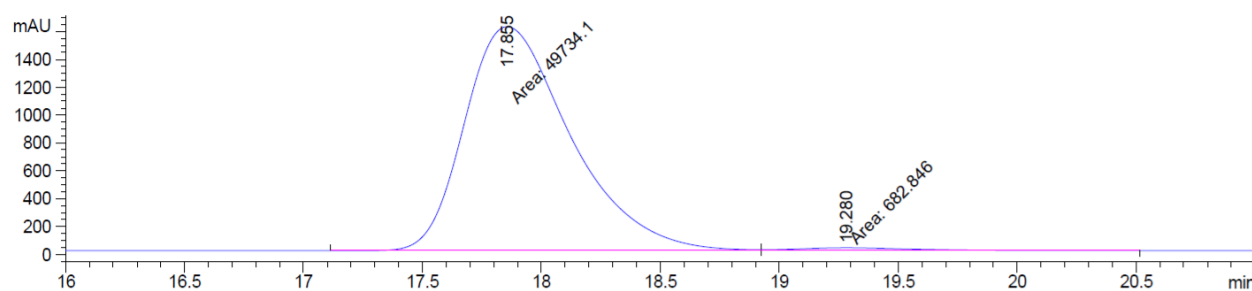

Signal 3: DAD1 C, Sig=210,4 Ref=450,100

| Peak # | RetTime [min] | Type | Width [min] | Area [mAU*s] | Height [mAU] | Area %  |
|--------|---------------|------|-------------|--------------|--------------|---------|
| 1      | 17.855        | MF   | 0.5153      | 4.97341e4    | 1608.62207   | 98.6456 |
| 2      | 19.280        | FM   | 0.5700      | 682.84619    | 19.96699     | 1.3544  |

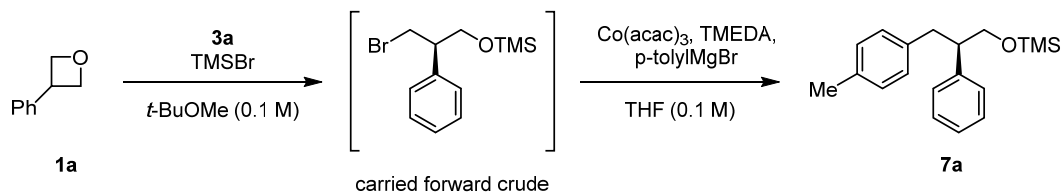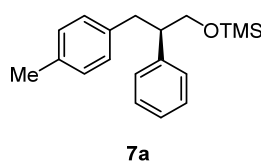

**(R)-trimethyl(2-phenyl-3-(p-tolyl)propoxy)silane (7a):** Oxetane **1a** (53.7 mg, 0.4 mmol, 1 equiv.) underwent reaction according to General Procedure B to yield **2a** which was immediately carried forward crude following a procedure reported by Cahiez.<sup>23</sup> The crude alkyl bromide **2a**, cobalt(III) acetylacetonate (7.1 mg, 0.02 mmol, 0.05 equiv.) and TMEDA (3.0  $\mu$ L, 0.02 mmol, 0.05 equiv.) were added to an oven-dried 2-dram vial, placed under an atmosphere of nitrogen, and dissolved in THF (4.0 mL, 0.1 M). The

solution was cooled to 0 °C and then *p*-tolylmagnesium bromide (0.44 mL of a 1 M solution in THF, 0.44 mmol, 1.1 equiv.) was added at a rate of 10  $\mu$ L/min using a syringe pump. After the addition was complete, the reaction was allowed to continue stirring at 0 °C for 30 minutes, after which it was quenched by the addition of saturated aqueous  $\text{NH}_4\text{Cl}$  and diluted with  $\text{Et}_2\text{O}$ . The organic layer was removed, and the aqueous layer was extracted 3x with  $\text{Et}_2\text{O}$ . Then the combined organic layers were washed with brine, dried over  $\text{MgSO}_4$ , filtered, concentrated, and purified by flash column chromatography to yield **7a** (96.1 mg, 0.32 mmol, 80% yield from 3-phenyloxetane). **7a** was determined to be of 97% e.e. by chiral HPLC analysis of the deprotected alcohol (ChiralCel OJ-H, 4% *i*-PrOH in hexanes, 1 mL/min,  $t_r(\text{major})=34.7$  min,  $t_r(\text{minor})=40.3$  min). The absolute configuration of **7a** was assigned based on that of **2a**. <sup>1</sup>H NMR (600 MHz,  $\text{CDCl}_3$ )  $\delta$  7.27 – 7.23 (m, 2H), 7.20 – 7.14 (m, 3H), 6.99 (d,  $J=7.7$  Hz, 2H), 6.94 (d,  $J=8.0$  Hz, 2H), 3.71 (d,  $J=6.3$  Hz, 2H), 3.12 (dd,  $J=13.6, 6.3$  Hz, 1H), 3.01 (dq,  $J=8.4, 6.3$  Hz, 1H), 2.82 (dd,  $J=13.6, 8.4$  Hz, 1H), 2.27 (s, 3H), 0.02 (s, 9H) ppm; <sup>13</sup>C NMR (126 MHz,  $\text{CDCl}_3$ )  $\delta$  142.9, 137.5, 135.2, 129.1, 128.9, 128.4, 128.2, 126.4, 66.6, 50.3, 38.0, 21.1, -0.4 ppm; FT-IR (thin-film): 3027, 2954, 2920, 2860, 1064, 1515, 1494, 1451, 1382, 1249, 1100, 1078, 1008, 953, 872, 836, 809, 746, 697, 580, 562, 546, 522, 499  $\text{cm}^{-1}$ ; HRMS (FTMS + p EI) calculated for  $\text{C}_{19}\text{H}_{26}\text{OSi}$   $[\text{M}]^+$  298.1747, found 298.1747;  $[\alpha]_D^{25} = -71.0^\circ$  ( $c = 1.0, \text{CHCl}_3$ ).

**Racemic sample:** HPLC (ChiralCel OJ-H, 4% *i*-PrOH in hexanes, 1 mL/min, 210 nm)

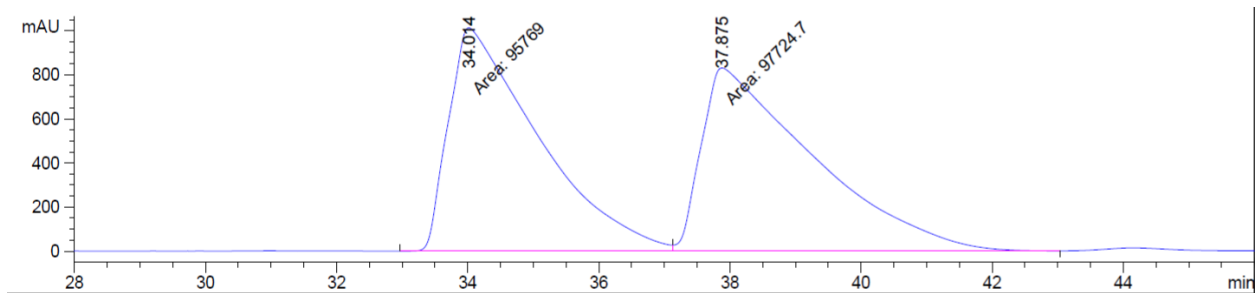

Signal 4: DAD1 D, Sig=210,4 Ref=450,100

| Peak # | RetTime [min] | Type | Width [min] | Area [mAU*s] | Height [mAU] | Area %  |
|--------|---------------|------|-------------|--------------|--------------|---------|
| 1      | 34.014        | MF   | 1.5759      | 9.57690e4    | 1012.84924   | 49.4946 |
| 2      | 37.875        | FM   | 1.9620      | 9.77247e4    | 830.15088    | 50.5054 |

**Enantioenriched sample:** HPLC (ChiralCel OJ-H, 4% *i*-PrOH in hexanes, 1 mL/min, 210 nm), 97% e.e.

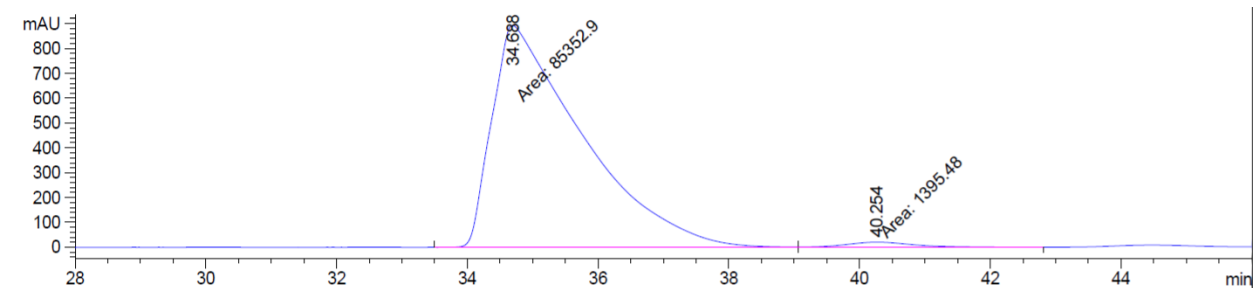

Signal 4: DAD1 D, Sig=210,4 Ref=450,100

| Peak # | RetTime [min] | Type | Width [min] | Area [mAU*s] | Height [mAU] | Area %  |
|--------|---------------|------|-------------|--------------|--------------|---------|
| 1      | 34.688        | MM   | 1.5921      | 8.53529e4    | 893.50555    | 98.3913 |
| 2      | 40.254        | MM   | 1.1550      | 1395.48474   | 20.13612     | 1.6087  |

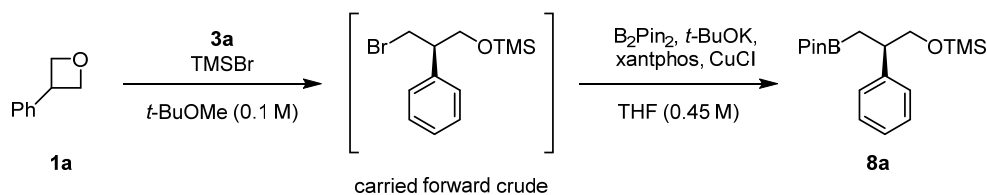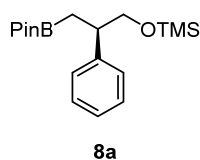

**(R)-trimethyl(2-phenyl-3-(4,4,5,5-tetramethyl-1,3,2-dioxaborolan-2-yl)propoxy)silane**

**(8a):** Oxetane **1a** (53.7 mg, 0.4 mmol, 1 equiv.) underwent reaction according to General Procedure B to yield **2a** which was immediately carried forward crude following a procedure based on that previously reported by Ito.<sup>24</sup> Copper(I) chloride (7.9 mg, 0.08 mmol, 0.2 equiv.), xantphos (46.3 mg, 0.08 mmol, 0.2 equiv.), and B<sub>2</sub>Pin<sub>2</sub> (122 mg, 0.48 mmol, 1.2 equiv.) were added to an oven-dried 0.5-dram vial, placed under an atmosphere of nitrogen, and suspended

in an argon-sparged solution of *t*-BuOK (0.48 mL of a 1 M solution in THF, 0.48 mmol, 1.2 equiv.). The crude bromide from the first step (**2a**) was then added dropwise as a solution in argon-sparged THF (assumed 115 mg in 0.4 mL of THF, 0.4 mmol, 1 M, 1 equiv.), and the reaction was allowed to proceed under an atmosphere of nitrogen. After 48 hours, the reaction was run through a silica plug, eluting with 1:1 hexanes-Et<sub>2</sub>O and the filtrate was concentrated under vacuum and purified by flash column chromatography to yield boronic ester **8a** (88.6 mg, 0.26 mmol, 66% yield from 3-phenyloxetane). **8a** was determined to be of 94% e.e. by chiral HPLC analysis of the free alcohol which was formed by briefly stirring the silylated product with 1 M aqueous HCl (ChiralPak IC, 5% *i*-PrOH in hexanes, 1 mL/min, *t*<sub>r</sub>(major)= 11.7 min, *t*<sub>r</sub>(minor)= 10.4 min). We suspect that the measured decrease in e.e. reflects poor chromatographic separation of the enantiomers causing an underestimation of the enantiomeric enrichment, but we cannot rule out the possibility that a small amount of epimerization occurred under the reaction conditions. The absolute configuration of **8a** was assigned based on that of **2a**. **<sup>1</sup>H NMR** (600 MHz, CDCl<sub>3</sub>) δ 7.27 – 7.23 (m, 2H), 7.23 – 7.20 (m, 2H), 7.18 – 7.14 (m, 1H), 3.65 (dd, *J* = 9.9, 6.3 Hz, 1H), 3.57 (dd, *J* = 9.9, 7.3 Hz, 1H), 3.02 (dq, *J* = 9.3, 6.7 Hz, 1H), 1.31 (dd, *J* = 15.5, 6.6 Hz, 1H), 1.11–1.05 (m, 1H), 1.10 (s, 6H), 1.07 (s, 6H), 0.02 (s, 9H) ppm; **<sup>13</sup>C NMR** (126 MHz, CDCl<sub>3</sub>) δ 144.6, 128.08, 128.06, 126.2, 83.0, 69.3, 44.0, 24.8, 24.7, 15.8–14.0 (br), –0.4 ppm; **FT-IR** (thin-film): 2978, 2958, 1453, 1370, 1320, 1250, 1213, 1145, 1096, 969, 873, 839, 748, 698, 535 cm<sup>-1</sup>; **HRMS** (FTMS + p CI) calculated for C<sub>18</sub>H<sub>30</sub>BO<sub>3</sub>Si [M–H]<sup>+</sup> 333.2052, found 333.2049; [α]<sub>D</sub> = –22.2° (c = 1.0, CHCl<sub>3</sub>).

**Racemic sample:** HPLC (ChiralPak IC, 5% *i*-PrOH in hexanes, 1 mL/min, 210 nm)

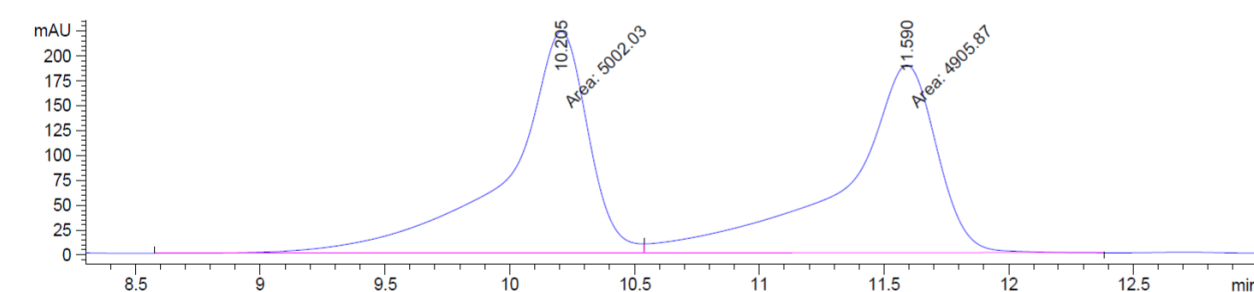

Signal 3: DAD1 C, Sig=210,4 Ref=450,100

| Peak # | RetTime [min] | Type | Width [min] | Area [mAU*s] | Height [mAU] | Area %  |
|--------|---------------|------|-------------|--------------|--------------|---------|
| 1      | 10.205        | MF   | 0.3738      | 5002.03467   | 223.04245    | 50.4853 |
| 2      | 11.590        | FM   | 0.4327      | 4905.86523   | 188.97437    | 49.5147 |

**Enantioenriched sample:** HPLC (ChiralPak IC, 5% *i*-PrOH in hexanes, 1 mL/min, 210 nm), 94% e.e.

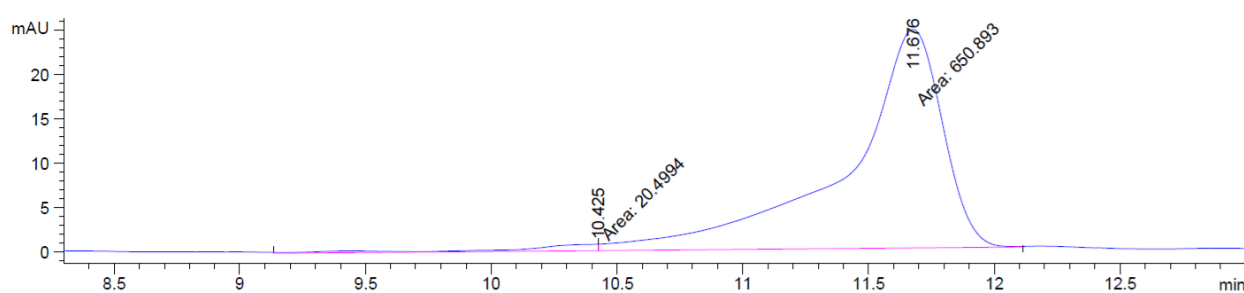

Signal 3: DAD1 C, Sig=210,4 Ref=450,100

| Peak # | RetTime [min] | Type | Width [min] | Area [mAU*s] | Height [mAU] | Area %  |
|--------|---------------|------|-------------|--------------|--------------|---------|
| 1      | 10.425        | MF   | 0.4427      | 20.49944     | 7.71783e-1   | 3.0533  |
| 2      | 11.676        | FM   | 0.4407      | 650.89276    | 24.61829     | 96.9467 |

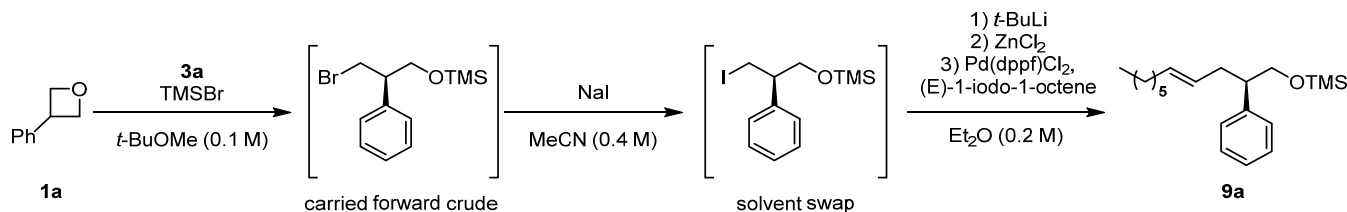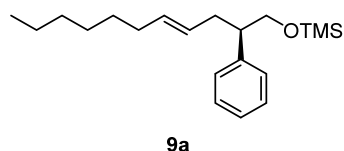

**(R,E)-trimethyl((2-phenylundec-4-en-1-yl)oxy)silane (9a):** Oxetane **1a** (53.7 mg, 0.4 mmol, 1 equiv.) underwent reaction according to General Procedure B to yield **2a** which was immediately carried forward crude. Alkyl bromide **2a** and NaI (90 mg, 0.60 mmol, 1.5 equiv.) were added to an oven-dried 2-dram vial, placed under an atmosphere of nitrogen, and dissolved in acetonitrile (1.0 mL, 0.4 M).

The solution was then heated to 55 °C and allowed to react overnight at that temperature with vigorous stirring in a sealed vial for 24 hours. The solution was then allowed to cool to room temperature and the acetonitrile was removed under vacuum. The solids were then re-suspended in Et<sub>2</sub>O (2.0 mL, 0.2 M) under an atmosphere of nitrogen and cooled to -78 °C in a dry-ice acetone bath. The temperature was allowed to equilibrate for 5 minutes, after which *t*-BuLi (0.52 mL of a 1.7 M solution in pentane, 0.88 mmol, 2.2 equiv.) was added dropwise. The reaction was allowed to proceed for 5 minutes, after which a solution of ZnCl<sub>2</sub> (0.44 mL of a 1 M solution in Et<sub>2</sub>O, 0.44 mmol, 1.1 equiv.) was added. The vial was transferred to an ice-bath and allowed to proceed at 0 °C for 20 minutes, after which Pd(dppf)Cl<sub>2</sub> was added followed immediately by a solution of (E)-1-iodo-1-octene (2.0 mL of a 0.24 M solution in THF, 0.48 mmol, 1.2 equiv.). The ice-bath was then removed and the reaction was allowed to proceed overnight at room temperature. The following day the reaction was diluted with Et<sub>2</sub>O and filtered through a celite plug. The filtrate was then concentrated and purified by flash column chromatography to yield **9a** (79.9 mg, 0.25 mmol, 63% yield from 3-phenyloxetane). **9a** was determined to be of 97% e.e. by chiral HPLC analysis of the deprotected alcohol (ChiralPak AD-H, 2% *i*-PrOH in hexanes, 1 mL/min, *t*<sub>r</sub>(major)= 26.6 min, *t*<sub>r</sub>(minor)= 21.6 min). The absolute configuration of **9a** was assigned based on that of **2a**. <sup>1</sup>H NMR (600 MHz, CDCl<sub>3</sub>) δ 7.30 – 7.25 (m, 2H), 7.21 – 7.15 (m, 3H), 5.37 (dt, *J* = 14.7, 6.6, 1.2 Hz, 1H), 5.31 – 5.24 (m, 1H), 3.68 (d, *J* = 6.5 Hz, 2H), 2.77 (dq, *J* = 8.7, 6.4 Hz, 1H), 2.51 (dddd, *J* = 14.1, 7.1, 6.0, 1.1 Hz, 1H), 2.27 (dddd, *J* = 14.1, 8.8, 6.5, 1.2 Hz, 1H), 1.93 – 1.86 (m, 2H), 1.32 – 1.14 (m, 8H), 0.87 (t, *J* = 7.2 Hz, 3H), 0.02 (s, 9H) ppm; <sup>13</sup>C NMR (126 MHz, CDCl<sub>3</sub>) δ 143.1, 132.4, 128.3, 128.2, 128.0, 126.4, 67.1, 48.8, 35.3, 32.7, 31.9, 29.6, 28.8, 22.8, 14.3, -0.4 ppm; FT-IR (thin-film): 3063, 3029, 2956, 2924, 2854, 1604, 1495, 1467, 1453, 1379,

1261, 1250, 1104, 1082, 967, 873, 839, 755, 698  $\text{cm}^{-1}$ ; **HRMS** (FTMS + p EI) calculated for  $\text{C}_{20}\text{H}_{34}\text{OSi} \cdot [\text{M} \cdot]^+$  318.2373, found 318.2374;  $[\alpha]_{\text{D}} = -28.4^\circ$  ( $c = 1.0$ ,  $\text{CHCl}_3$ ).

**Racemic sample:** HPLC (ChiralPak AD-H, 2% *i*-PrOH in hexanes, 1 mL/min, 210 nm)

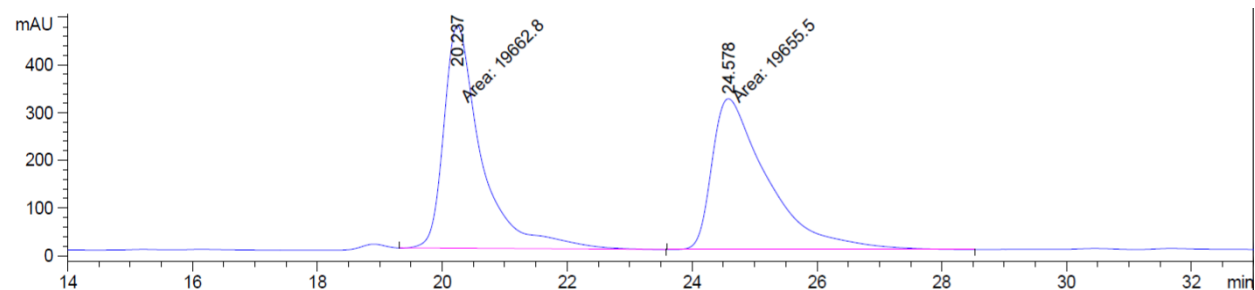

Signal 4: DAD1 D, Sig=210,4 Ref=450,100

| Peak # | RetTime [min] | Type | Width [min] | Area [mAU*s] | Height [mAU] | Area %  |
|--------|---------------|------|-------------|--------------|--------------|---------|
| 1      | 20.237        | MM   | 0.7010      | 1.96628e4    | 467.49231    | 50.0093 |
| 2      | 24.578        | MM   | 1.0352      | 1.96555e4    | 316.44034    | 49.9907 |

**Enantioenriched sample:** HPLC (ChiralPak AD-H, 2% *i*-PrOH in hexanes, 1 mL/min, 210 nm), 97% e.e.

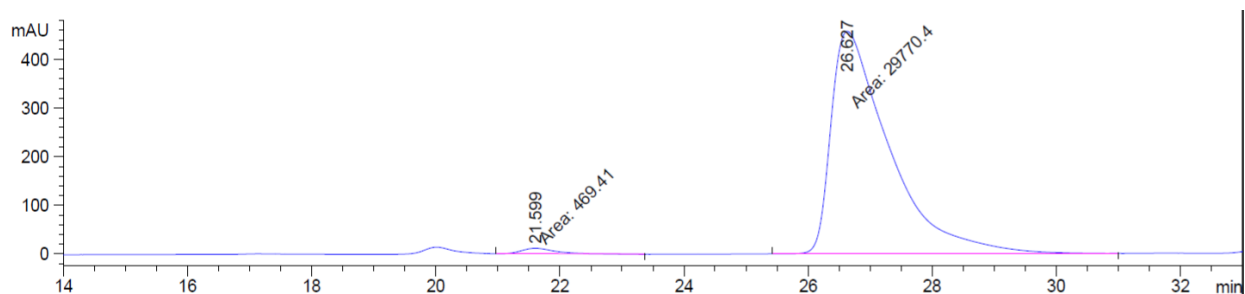

Signal 4: DAD1 D, Sig=210,4 Ref=450,100

| Peak # | RetTime [min] | Type | Width [min] | Area [mAU*s] | Height [mAU] | Area %  |
|--------|---------------|------|-------------|--------------|--------------|---------|
| 1      | 21.599        | MM   | 0.6670      | 469.41000    | 11.72877     | 1.5523  |
| 2      | 26.627        | MM   | 1.0852      | 2.97704e4    | 457.23355    | 98.4477 |

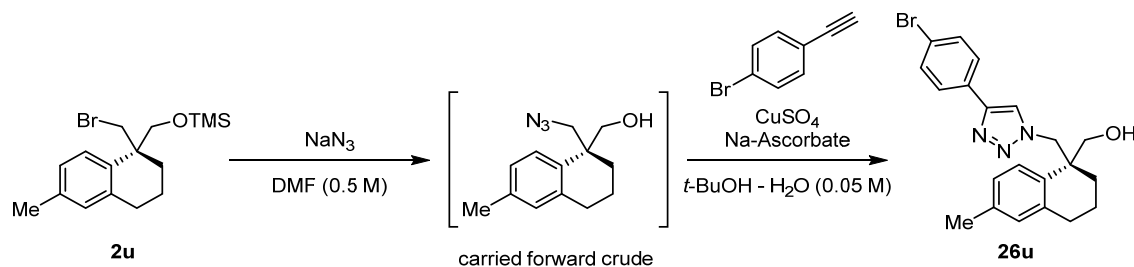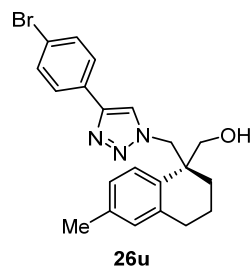

**(R)-(1-((4-bromophenyl)-1H-1,2,3-triazol-1-yl)methyl)-6-methyl-1,2,3,4-**

**tetrahydronaphthalen-1-yl)methanol (26u):** Alkyl bromide **2u** (34 mg, 0.10 mmol, 1 equiv.) was dissolved in DMF (1.0 mL, 0.1 M) and then sodium azide (26 mg, 0.40 mmol, 4 equiv.) was added. The reaction was then heated to 100 °C in a sealed container and allowed to proceed overnight at that temperature with vigorous stirring. The following day, the reaction was allowed to cool to room temperature, diluted with Et<sub>2</sub>O, and quenched by the addition of saturated aqueous NaHCO<sub>3</sub>. The aqueous layer was removed and the organic layer was washed 2x with saturated aqueous NaHCO<sub>3</sub>, washed with brine, dried over MgSO<sub>4</sub>, filtered, and concentrated. The crude product was carried forward assuming

complete conversion by dissolving it in a 1 : 1 mixture of *t*-BuOH and water (1.0 mL of each solvent, 0.05 M overall). Then 1-bromo-4-ethynylbenzene (21.7 mg, 0.12 mmol, 1.2 equiv.), copper(II) sulfate pentahydrate (6.2 mg, 0.025 mmol, 0.25 equiv.), and sodium ascorbate (9.91 mg, 0.050 mmol, 0.5 equiv.) were added and the reaction was allowed to continue overnight at room temperature with vigorous stirring. The following day, the reaction was diluted with EtOAc and water. The organic layer was removed, and the aqueous layer was extracted 3x with EtOAc. The combined organic layers were washed with brine, dried over Na<sub>2</sub>SO<sub>4</sub>, filtered, concentrated, and purified by flash column chromatography to yield triazole **26u** (10.2 mg, 0.025 mmol, 25% yield over both steps). **26u** was determined to be of 89% e.e. by chiral HPLC analysis (ChiralPak AD-H, 30% *i*-PrOH in hexanes, 1 mL/min, *t*<sub>r</sub>(major)= 9.5 min, *t*<sub>r</sub>(minor)= 8.3 min). <sup>1</sup>H NMR (500 MHz, CDCl<sub>3</sub>) δ 7.63 (d, *J* = 8.5 Hz, 2H), 7.53 (d, *J* = 8.5 Hz, 2H), 7.43 (s, 1H), 7.22 (d, *J* = 8.0 Hz, 1H), 7.01 (dd, *J* = 8.1, 2.0 Hz, 1H), 6.96 (s, 1H), 4.78 (d, *J* = 14.1 Hz, 1H), 4.55 (d, *J* = 14.1 Hz, 1H), 3.78 (d, *J* = 11.7 Hz, 1H), 3.66 (d, *J* = 11.7 Hz, 1H), 2.70 (q, *J* = 6.2, 5.6 Hz, 2H), 2.31 (s, 3H), 1.86 – 1.71 (m, 2H), 1.69 – 1.61 (m, 2H), 1.26 (s, 1H) ppm; <sup>13</sup>C NMR (126 MHz, CDCl<sub>3</sub>) δ 146.5, 138.4, 137.0, 134.1, 132.1, 130.7, 129.6, 127.4, 127.3, 127.2, 122.2, 121.5, 68.5, 56.5, 43.2, 30.4, 29.5, 21.0, 19.0 ppm; FT-IR (thin-film): 3348 (br), 3137, 2925, 2869, 1717, 1614, 1549, 1500, 1481, 1455, 1401, 1355, 1231, 1181, 1099, 1069, 1047, 1011, 972, 908, 820, 732, 648, 571, 512 cm<sup>-1</sup>; HRMS (ESI-TOF) calculated for C<sub>21</sub>H<sub>23</sub>BrN<sub>3</sub>O [M+H]<sup>+</sup> 412.1019, found 412.1030; [α]<sub>D</sub> = -8.2° (c = 1.0, CHCl<sub>3</sub>). A crystal suitable for X-ray diffraction of the HCl salt of **26u** was grown by vapor diffusion of an ethereal solution of HCl into a solution of triazole **26u** in diethyl ether, allowing for the assignment of the absolute configuration of **2u** (see section **SI-X-Ray crystallography** for crystallographic details).

**Racemic sample:** HPLC (ChiralPak AD-H, 30% *i*-PrOH in hexanes, 1 mL/min, 254 nm)

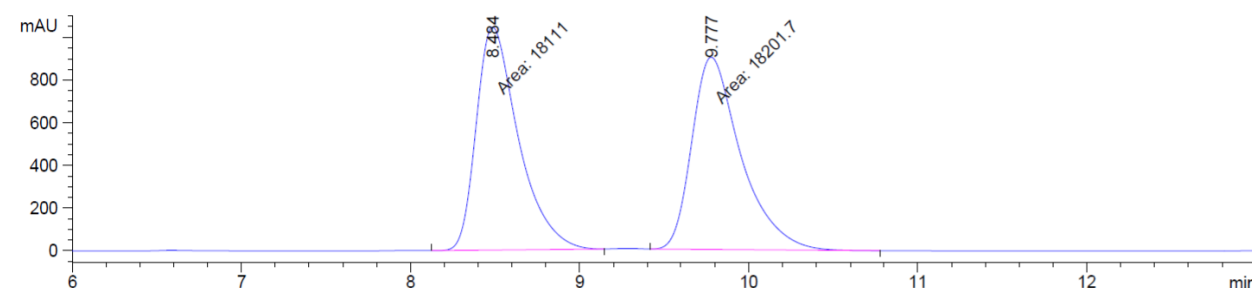



Signal 1: DAD1 A, Sig=254,4 Ref=450,100

| Peak # | RetTime [min] | Type | Width [min] | Area [mAU*s] | Height [mAU] | Area %  |
|--------|---------------|------|-------------|--------------|--------------|---------|
| 1      | 8.484         | MM   | 0.2888      | 1.81110e4    | 1045.04724   | 49.8750 |
| 2      | 9.777         | MM   | 0.3365      | 1.82017e4    | 901.39307    | 50.1250 |

**Enantioenriched sample:** HPLC (ChiralPak AD-H, 30% *i*-PrOH in hexanes, 1 mL/min, 254 nm), 89% e.e.

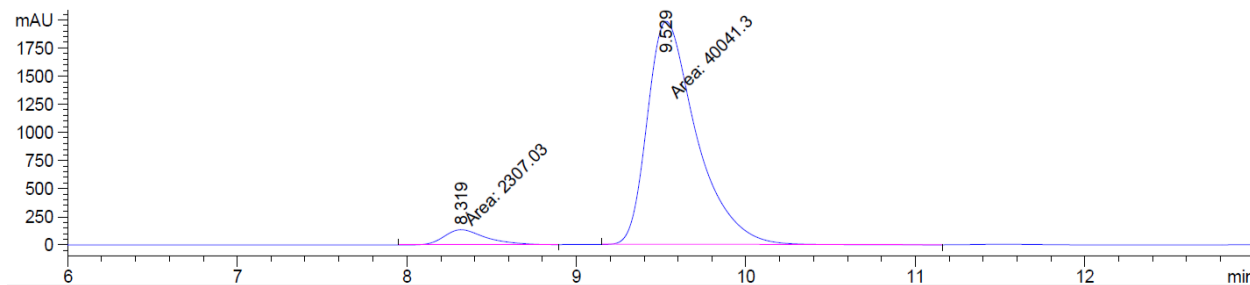

Signal 1: DAD1 A, Sig=254,4 Ref=450,100

| Peak # | RetTime [min] | Type | Width [min] | Area [mAU*s] | Height [mAU] | Area %  |
|--------|---------------|------|-------------|--------------|--------------|---------|
| 1      | 8.319         | MM   | 0.2853      | 2307.02808   | 134.76653    | 5.4477  |
| 2      | 9.529         | MM   | 0.3364      | 4.00413e4    | 1983.69531   | 94.5523 |

## Preparative-Scale Synthesis of Pretomanid

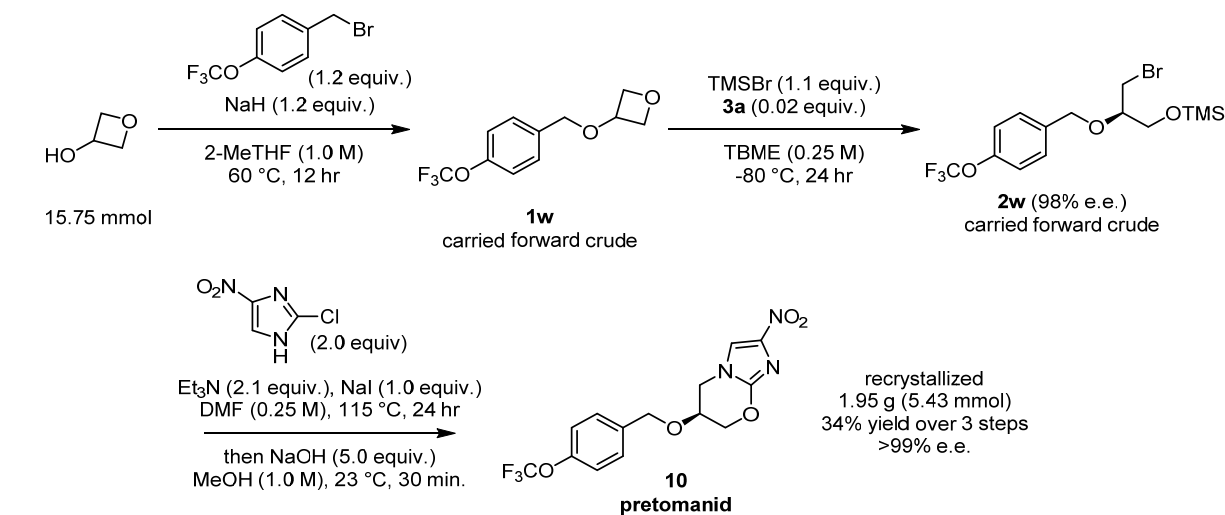

**3-((4-(trifluoromethoxy)benzyl)oxy)oxetane (1w):** A round-bottom flask with a stir bar was flame-dried under reduced pressure and backfilled with nitrogen gas. The flask was charged with sodium hydride, 60% dispersion in mineral oil (760 mg, 18.9 mmol, 1.2 equiv) and 2-methyltetrahydrofuran (16.0 mL, 1.0 M). The solution was cooled to 0 °C using an ice bath and 3-hydroxyoxetane (1.0 mL, 15.75 mmol, 1.0 equiv) was added dropwise. The mixture was stirred at 0 °C for 1 minute, then 4-(trifluoromethoxy)benzyl bromide (3.0 mL, 18.9 mmol, 1.2 equiv) was added. The reaction was removed from the ice bath and allowed to warm to room temperature, then warmed to 60 °C using an oil bath. The reaction was stirred for 12 h and was then removed from the oil bath. Once the solution was at room temperature, the reaction was quenched by dropwise addition of saturated aqueous NaHCO<sub>3</sub> (30 mL). The layers were separated and the aqueous phase was extracted with ethyl acetate (3 x 20 mL). The organic layers were combined and washed with saturated aqueous NH<sub>4</sub>Cl (30 mL) followed by saturated aqueous NaHCO<sub>3</sub> (30 mL). The resultant organic phase was dried over Na<sub>2</sub>SO<sub>4</sub> and concentrated under reduced pressure to yield the corresponding benzylated product **1w** as a yellow oil. No further purification was done.

**(R)-3-bromo-2-((4-(trifluoromethoxy)benzyl)oxy)propoxy)trimethylsilane (2w):** A round-bottom flask with a stir bar was flame-dried under reduced pressure and backfilled with nitrogen gas. The flask was charged with benzylated intermediate **1w** in *t*-BuOMe (64 mL, 0.25 M) followed by squaramide catalyst **3a** (215 mg, 0.32 mmol, 0.02 equiv). The mixture was stirred at room temperature for 10 minutes and then cooled to -78 °C using an acetone/dry ice bath. The temperature was allowed to equilibrate for 10 minutes and TMSBr (2.3 mL, 17.3 mmol, 1.1 equiv) was added. The reaction was stirred for an additional 10 minutes and was then transferred to a -80 °C freezer. The mixture was aged without stirring for 24 h and then warmed to room temperature. The reaction was transferred into a separatory funnel and saturated aqueous NaHCO<sub>3</sub> (30 mL) was added. The layers were separated without agitation and the aqueous layer was extracted with ethyl acetate (3 x 20 mL). The combined organic layers were dried over Na<sub>2</sub>SO<sub>4</sub> and concentrated under reduced pressure to yield the corresponding bromide product **2w** as a yellow oil. No further purification was done. To determine the e.e. of **2w**: a sample of bromide **2w** (5 mg) was stirred with silica gel (1.5 g) in ethyl acetate (2 mL) for 1 hour to deprotect the silyl ether. The suspension was then filtered over a cotton plug and the filtrate was reduced under reduced pressure. **2w** was determined to be of 98% e.e. by chiral HPLC analysis of the desilylated alcohol (ChiralPak AS-H, 3% *i*-PrOH in hexanes, 1 mL/min, *t*<sub>r</sub>(major)=34.4 min, *t*<sub>r</sub>(minor)=30.1 min). The absolute configuration of **2w** was assigned following its derivatization to pretomanid (**10**).

**Racemic sample:** HPLC (ChiralPak AS-H, 3% *i*-PrOH in hexanes, 1 mL/min, 220 nm)

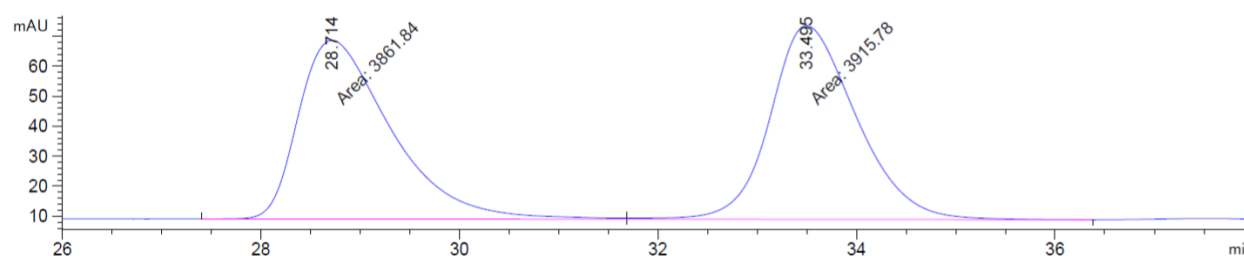

Signal 4: DAD1 D, Sig=220,16 Ref=450,100

| Peak # | RetTime [min] | Type | Width [min] | Area [mAU*s] | Height [mAU] | Area %  |
|--------|---------------|------|-------------|--------------|--------------|---------|
| 1      | 28.714        | MF   | 1.0812      | 3861.83667   | 59.52892     | 49.6532 |
| 2      | 33.495        | FM   | 1.0107      | 3915.77661   | 64.57066     | 50.3468 |

**Enantioenriched sample:** HPLC (ChiralPak AS-H, 3% *i*-PrOH in hexanes, 1 mL/min, 220 nm), 98% e.e.

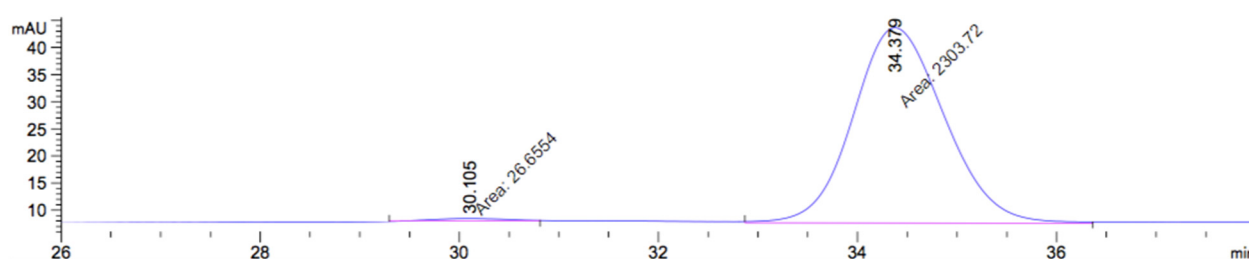

Signal 4: DAD1 D, Sig=220,16 Ref=450,100

| Peak # | RetTime [min] | Type | Width [min] | Area [mAU*s] | Height [mAU] | Area %  |
|--------|---------------|------|-------------|--------------|--------------|---------|
| 1      | 30.105        | MM   | 0.8859      | 26.65538     | 5.01458e-1   | 1.1438  |
| 2      | 34.379        | MM   | 1.0658      | 2303.71509   | 36.02395     | 98.8562 |

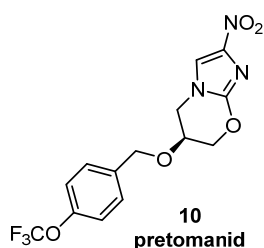

**Pretomanid (10):** A round-bottom flask with a stir bar was flame-dried under reduced pressure and backfilled with nitrogen gas. The flask was charged with substrate **2w** in DMF (63 mL, 0.25 M) followed by 2-chloro-4-nitroimidazole (4.65 g, 31.5 mmol, 2.0 equiv), Et<sub>3</sub>N (4.6 mL, 33.1 mmol, 2.1 equiv), and NaI (2.36 g, 15.75 mmol, 1.0 equiv). The mixture was heated to 115 °C using an oil bath and stirred for 24 h. The reaction was removed from the oil bath and allowed to cool. Once at room temperature, NaOH (3.15 g, 78.8 mmol, 5.0 equiv) and MeOH (16 mL, 1.0 M) were added. The mixture was stirred for an additional 0.5 h and the resulting solution was transferred to a separatory funnel containing DI H<sub>2</sub>O (200 mL). The layers were separated, and the organic phase was dried over Na<sub>2</sub>SO<sub>4</sub>. The crude product was purified by recrystallization by dissolving the mixture in isopropyl alcohol (50 mL), adding hexanes (200 mL), and aging in a 5 °C fridge for 6 h. The solution was filtered to afford pretomanid (**10**) as a discolored solid (1.83 g, 5.1 mmol, 32% yield). Concentrating the mother liquor and repeating the recrystallization provided additional pretomanid (**10**) (120 mg, 0.33 mmol, 2% yield) for a total 34% three-step synthesis of pretomanid (**10**) (1.95 g, 5.43 mmol, 34% yield). The spectral data were consistent with those acquired for an authentic sample of the drug from Millipore Sigma: <sup>1</sup>H NMR (600 MHz, CDCl<sub>3</sub>) δ 7.40 (s, 1H), 7.35 (d, J = 8.6 Hz, 2H), 7.22 (d, J = 8.3 Hz, 2H), 4.73 (d, J = 11.9 Hz, 1H), 4.65 – 4.60 (m, 2H), 4.36 (d, J = 12.0 Hz, 1H), 4.21 (dd, J = 12.7, 3.7 Hz, 1H), 4.18 – 4.11 (m, 2H) ppm; Pretomanid (**10**) was determined to be of >99% e.e. by chiral SFC analysis (ChiralPak IB,

20% MeOH/CO<sub>2</sub>, 5 mL/min, tr(major)= 3.6 min, tr(minor)= 2.8 min). The absolute configuration of **10** was assigned by SFC comparison to an authentic sample of the drug from MilliporeSigma.

**Racemic sample:** SFC (ChiralPak IB, 20% MeOH/CO<sub>2</sub>, 5 mL/min, 210 nm)

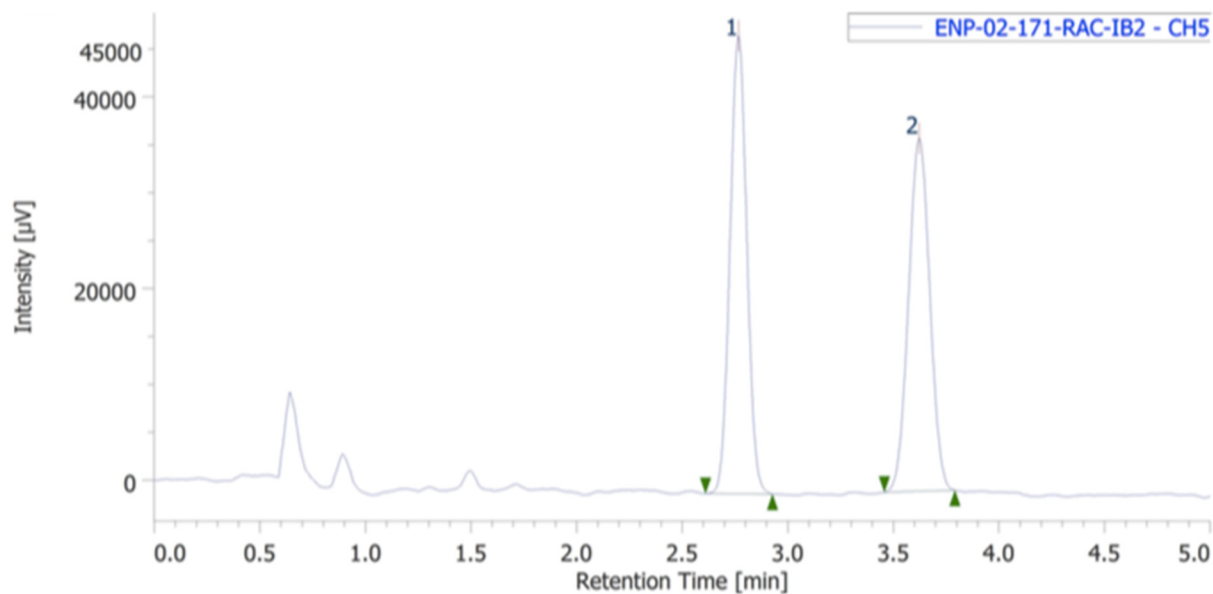

| # | Peak Name | CH | tR [min] | Area [µV·sec] | Height [µV] | Area% | Height% |
|---|-----------|----|----------|---------------|-------------|-------|---------|
| 1 | Unknown   | 5  | 2.767    | 264985        | 47790       | 50.7  | 56.5    |
| 2 | Unknown   | 5  | 3.620    | 257922        | 36820       | 49.3  | 43.5    |

**Synthetic, enantioenriched sample:** SFC (ChiralPak IB, 20% MeOH/CO<sub>2</sub>, 5 mL/min, 210 nm), >99% e.e.

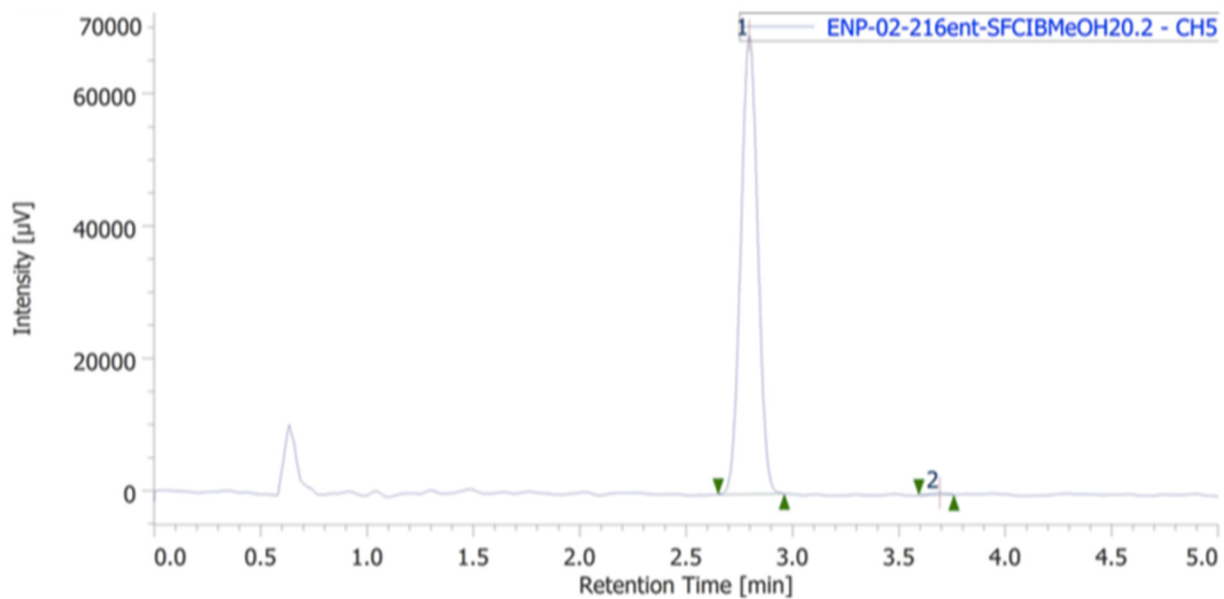

| # | Peak Name | CH | tR [min] | Area [µV·sec] | Height [µV] | Area% | Height% |
|---|-----------|----|----------|---------------|-------------|-------|---------|
| 1 | Unknown   | 5  | 2.797    | 384897        | 69244       | 99.6  | 99.6    |
| 2 | Unknown   | 5  | 3.690    | 1610          | 302         | 0.417 | 0.434   |

Sample from MilliporeSigma: SFC (ChiralPak IB, 20% MeOH/CO<sub>2</sub>, 5 mL/min, 210 nm), >99% e.e.

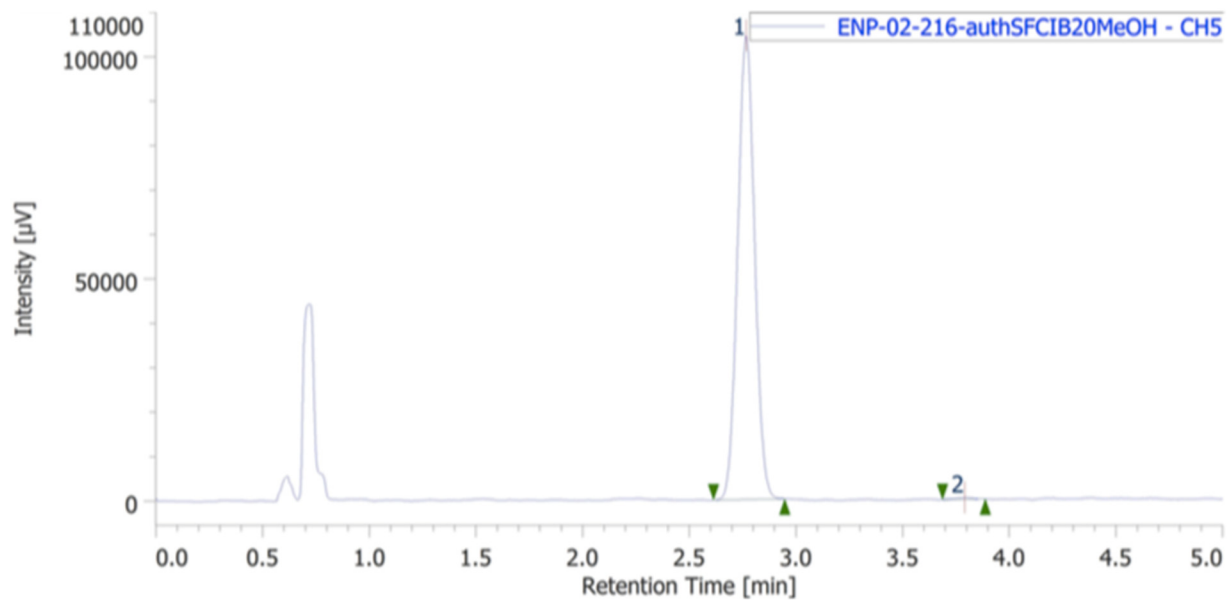

| # | Peak Name | CH | tR [min] | Area [µV·sec] | Height [µV] | Area% | Height% |
|---|-----------|----|----------|---------------|-------------|-------|---------|
| 1 | Unknown   | 5  | 2.767    | 578207        | 104432      | 99.6  | 99.6    |
| 2 | Unknown   | 5  | 3.790    | 2134          | 385         | 0.368 | 0.367   |

## X-Ray Crystallography

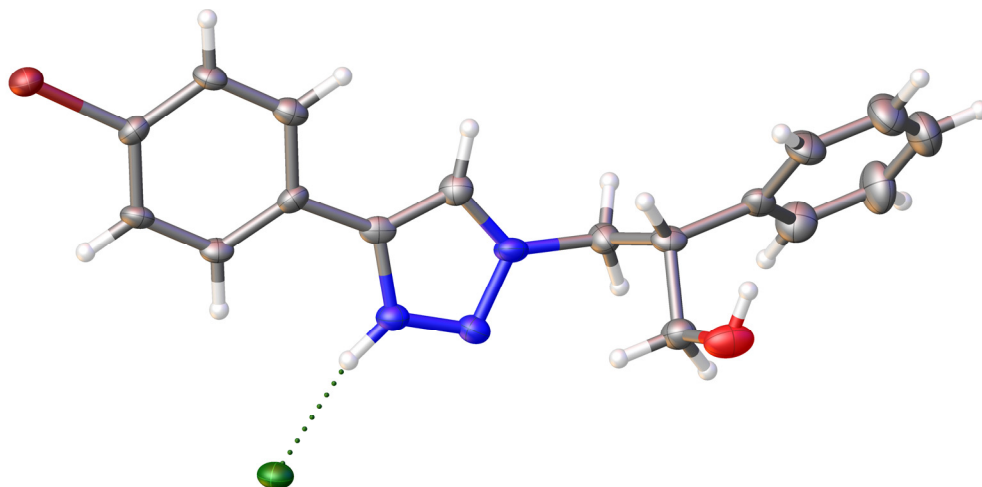

**26a**

**X-ray Crystallography:** A crystal mounted on a diffractometer was collected data at 100 K. The intensities of the reflections were collected by means of a Bruker APEX DUO CCD diffractometer ( $\text{Cu}_{K\alpha}$  radiation,  $\lambda=1.54178 \text{ \AA}$ ), and equipped with an Oxford Cryosystems nitrogen flow apparatus. The collection method involved  $1.0^\circ$  scans in  $\omega$  at  $-30^\circ, -55^\circ, -80^\circ, 30^\circ, 55^\circ, 80^\circ$  and  $115^\circ$  in  $2\theta$ . Data integration down to  $0.84 \text{ \AA}$  resolution was carried out using SAINT V8.37 A<sup>25</sup> with reflection spot size optimization. Absorption corrections were made with the program SADABS.<sup>25</sup> The structure was solved by the Intrinsic Phasing methods and refined by least-squares methods against  $F^2$  using SHELXT-2014<sup>26</sup> and SHELXL-2014<sup>27</sup> with OLEX 2 interface.<sup>28</sup> Non-hydrogen atoms were refined anisotropically, and hydrogen atoms were allowed to ride on the respective atoms. Crystal data as well as details of data collection and refinement are summarized in Table S1, geometric parameters are shown in Table S2 and hydrogen-bond parameters are listed in Table S3. The Ortep plots produced with SHELXL-2014 program, and the other drawings were produced with Accelrys DS Visualizer 2.0.<sup>29</sup>

**Table S1. Experimental details**

|                             |                                                    |
|-----------------------------|----------------------------------------------------|
|                             | DAS-V-181-1                                        |
| Crystal data                |                                                    |
| Chemical formula            | $\text{C}_{17}\text{H}_{17}\text{BrClN}_3\text{O}$ |
| $M_r$                       | 394.69                                             |
| Crystal system, space group | Orthorhombic, $P2_12_12_1$                         |
| Temperature (K)             | 100                                                |
| $a, b, c$ ( $\text{\AA}$ )  | 6.9388 (2), 15.0508 (3), 32.5860 (8)               |
| $V$ ( $\text{\AA}^3$ )      | 3403.10 (15)                                       |
| $Z$                         | 8                                                  |
| Radiation type              | $\text{Cu } K\alpha$                               |
| $\mu$ ( $\text{mm}^{-1}$ )  | 4.80                                               |
| Crystal size (mm)           | $0.24 \times 0.10 \times 0.08$                     |

|                                                                            |                                                                                                                                |
|----------------------------------------------------------------------------|--------------------------------------------------------------------------------------------------------------------------------|
| Data collection                                                            |                                                                                                                                |
| Diffractionmeter                                                           | Bruker D8 goniometer with CCD area detector                                                                                    |
| Absorption correction                                                      | Multi-scan<br><i>SADABS</i>                                                                                                    |
| $T_{\min}, T_{\max}$                                                       | 0.608, 0.753                                                                                                                   |
| No. of measured, independent and observed [ $I > 2\sigma(I)$ ] reflections | 36923, 5929, 5058                                                                                                              |
| $R_{\text{int}}$                                                           | 0.088                                                                                                                          |
| $(\sin \theta/\lambda)_{\text{max}}$ ( $\text{\AA}^{-1}$ )                 | 0.596                                                                                                                          |
| Refinement                                                                 |                                                                                                                                |
| $R[F^2 > 2\sigma(F^2)], wR(F^2), S$                                        | 0.046, 0.100, 1.05                                                                                                             |
| No. of reflections                                                         | 5929                                                                                                                           |
| No. of parameters                                                          | 423                                                                                                                            |
| H-atom treatment                                                           | H atoms treated by a mixture of independent and constrained refinement                                                         |
| $\Delta\rho_{\text{max}}, \Delta\rho_{\text{min}}$ ( $\text{e \AA}^{-3}$ ) | 0.71, -0.59                                                                                                                    |
| Absolute structure                                                         | Flack x determined using 1910 quotients $[(I+)-(I-)]/[(I+)+(I-)]$ (Parsons, Flack and Wagner, Acta Cryst. B69 (2013) 249-259). |
| Absolute structure parameter                                               | -0.017 (16)                                                                                                                    |

Computer programs: *SAINT* 8.37A,<sup>25</sup> *SHELXT2014*,<sup>26</sup> *SHELXL2014*,<sup>27</sup> Bruker *SHELXTL*.<sup>26,27</sup>

**Table S2. Geometric parameters ( $\text{\AA}, ^\circ$ )**

|        |            |         |            |
|--------|------------|---------|------------|
| Br1—C6 | 1.886 (7)  | Br2—C26 | 1.891 (7)  |
| O1—C17 | 1.424 (10) | O2—C37  | 1.428 (10) |
| O1—H1  | 0.8400     | O2—H2   | 0.8400     |
| N1—N2  | 1.329 (8)  | N4—N5   | 1.301 (8)  |
| N1—C1  | 1.333 (9)  | N4—C21  | 1.359 (9)  |
| N1—C9  | 1.482 (9)  | N4—C29  | 1.468 (10) |
| N2—N3  | 1.321 (9)  | N5—N6   | 1.326 (9)  |
| N3—C2  | 1.373 (9)  | N6—C22  | 1.370 (9)  |
| N3—H3  | 0.84 (9)   | N6—H6   | 0.95 (9)   |
| C1—C2  | 1.365 (10) | C21—C22 | 1.371 (11) |
| C1—H1A | 0.9500     | C21—H21 | 0.9500     |
| C2—C3  | 1.474 (10) | C22—C23 | 1.462 (11) |
| C3—C8  | 1.397 (10) | C23—C24 | 1.399 (10) |
| C3—C4  | 1.398 (10) | C23—C28 | 1.403 (11) |

|           |            |            |            |
|-----------|------------|------------|------------|
| C4—C5     | 1.390 (11) | C24—C25    | 1.379 (11) |
| C4—H4     | 0.9500     | C24—H24    | 0.9500     |
| C5—C6     | 1.404 (10) | C25—C26    | 1.396 (10) |
| C5—H5     | 0.9500     | C25—H25    | 0.9500     |
| C6—C7     | 1.385 (9)  | C26—C27    | 1.393 (10) |
| C7—C8     | 1.386 (10) | C27—C28    | 1.381 (10) |
| C7—H7     | 0.9500     | C27—H27    | 0.9500     |
| C8—H8     | 0.9500     | C28—H28    | 0.9500     |
| C9—C10    | 1.531 (10) | C29—C30    | 1.528 (11) |
| C9—H9A    | 0.9900     | C29—H29A   | 0.9900     |
| C9—H9B    | 0.9900     | C29—H29B   | 0.9900     |
| C10—C11   | 1.526 (10) | C30—C31    | 1.531 (10) |
| C10—C17   | 1.540 (10) | C30—C37    | 1.538 (10) |
| C10—H10   | 1.0000     | C30—H30    | 1.0000     |
| C11—C12   | 1.388 (12) | C31—C36    | 1.381 (12) |
| C11—C16   | 1.406 (11) | C31—C32    | 1.386 (12) |
| C12—C13   | 1.384 (13) | C32—C33    | 1.412 (13) |
| C12—H12   | 0.9500     | C32—H32    | 0.9500     |
| C13—C14   | 1.390 (14) | C33—C34    | 1.375 (14) |
| C13—H13   | 0.9500     | C33—H33    | 0.9500     |
| C14—C15   | 1.376 (15) | C34—C35    | 1.374 (14) |
| C14—H14   | 0.9500     | C34—H34    | 0.9500     |
| C15—C16   | 1.402 (12) | C35—C36    | 1.387 (12) |
| C15—H15   | 0.9500     | C35—H35    | 0.9500     |
| C16—H16   | 0.9500     | C36—H36    | 0.9500     |
| C17—H17A  | 0.9900     | C37—H37A   | 0.9900     |
| C17—H17B  | 0.9900     | C37—H37B   | 0.9900     |
|           |            |            |            |
| C17—O1—H1 | 109.5      | C37—O2—H2  | 109.5      |
| N2—N1—C1  | 112.5 (6)  | N5—N4—C21  | 112.7 (6)  |
| N2—N1—C9  | 119.4 (6)  | N5—N4—C29  | 118.9 (6)  |
| C1—N1—C9  | 128.1 (6)  | C21—N4—C29 | 128.4 (6)  |
| N3—N2—N1  | 103.8 (6)  | N4—N5—N6   | 105.4 (6)  |
| N2—N3—C2  | 112.9 (6)  | N5—N6—C22  | 111.4 (6)  |
| N2—N3—H3  | 123 (6)    | N5—N6—H6   | 119 (5)    |
| C2—N3—H3  | 124 (6)    | C22—N6—H6  | 129 (5)    |
| N1—C1—C2  | 107.1 (6)  | N4—C21—C22 | 105.4 (6)  |



|             |           |               |           |
|-------------|-----------|---------------|-----------|
| N1—C1—H1A   | 126.4     | N4—C21—H21    | 127.3     |
| C2—C1—H1A   | 126.4     | C22—C21—H21   | 127.3     |
| C1—C2—N3    | 103.7 (6) | N6—C22—C21    | 105.1 (7) |
| C1—C2—C3    | 132.4 (7) | N6—C22—C23    | 124.7 (7) |
| N3—C2—C3    | 123.9 (7) | C21—C22—C23   | 130.2 (7) |
| C8—C3—C4    | 120.0 (7) | C24—C23—C28   | 119.5 (8) |
| C8—C3—C2    | 122.2 (6) | C24—C23—C22   | 118.5 (7) |
| C4—C3—C2    | 117.7 (7) | C28—C23—C22   | 122.0 (6) |
| C5—C4—C3    | 120.0 (7) | C25—C24—C23   | 120.1 (7) |
| C5—C4—H4    | 120.0     | C25—C24—H24   | 120.0     |
| C3—C4—H4    | 120.0     | C23—C24—H24   | 120.0     |
| C4—C5—C6    | 119.1 (6) | C24—C25—C26   | 119.7 (6) |
| C4—C5—H5    | 120.4     | C24—C25—H25   | 120.1     |
| C6—C5—H5    | 120.4     | C26—C25—H25   | 120.1     |
| C7—C6—C5    | 121.0 (7) | C27—C26—C25   | 121.1 (7) |
| C7—C6—Br1   | 120.2 (6) | C27—C26—Br2   | 120.6 (6) |
| C5—C6—Br1   | 118.8 (5) | C25—C26—Br2   | 118.3 (5) |
| C6—C7—C8    | 119.6 (7) | C28—C27—C26   | 118.9 (7) |
| C6—C7—H7    | 120.2     | C28—C27—H27   | 120.6     |
| C8—C7—H7    | 120.2     | C26—C27—H27   | 120.6     |
| C7—C8—C3    | 120.3 (6) | C27—C28—C23   | 120.8 (7) |
| C7—C8—H8    | 119.9     | C27—C28—H28   | 119.6     |
| C3—C8—H8    | 119.9     | C23—C28—H28   | 119.6     |
| N1—C9—C10   | 112.4 (6) | N4—C29—C30    | 111.5 (7) |
| N1—C9—H9A   | 109.1     | N4—C29—H29A   | 109.3     |
| C10—C9—H9A  | 109.1     | C30—C29—H29A  | 109.3     |
| N1—C9—H9B   | 109.1     | N4—C29—H29B   | 109.3     |
| C10—C9—H9B  | 109.1     | C30—C29—H29B  | 109.3     |
| H9A—C9—H9B  | 107.8     | H29A—C29—H29B | 108.0     |
| C11—C10—C9  | 110.5 (7) | C29—C30—C31   | 109.3 (7) |
| C11—C10—C17 | 111.0 (6) | C29—C30—C37   | 112.4 (6) |
| C9—C10—C17  | 109.2 (6) | C31—C30—C37   | 111.0 (6) |
| C11—C10—H10 | 108.7     | C29—C30—H30   | 108.0     |
| C9—C10—H10  | 108.7     | C31—C30—H30   | 108.0     |
| C17—C10—H10 | 108.7     | C37—C30—H30   | 108.0     |
| C12—C11—C16 | 119.2 (8) | C36—C31—C32   | 118.7 (8) |
| C12—C11—C10 | 122.4 (7) | C36—C31—C30   | 123.1 (7) |

|               |            |                 |            |
|---------------|------------|-----------------|------------|
| C16—C11—C10   | 118.4 (8)  | C32—C31—C30     | 118.3 (8)  |
| C13—C12—C11   | 120.8 (8)  | C31—C32—C33     | 120.0 (10) |
| C13—C12—H12   | 119.6      | C31—C32—H32     | 120.0      |
| C11—C12—H12   | 119.6      | C33—C32—H32     | 120.0      |
| C12—C13—C14   | 120.1 (9)  | C34—C33—C32     | 119.9 (10) |
| C12—C13—H13   | 119.9      | C34—C33—H33     | 120.0      |
| C14—C13—H13   | 119.9      | C32—C33—H33     | 120.0      |
| C15—C14—C13   | 119.9 (9)  | C35—C34—C33     | 120.2 (10) |
| C15—C14—H14   | 120.1      | C35—C34—H34     | 119.9      |
| C13—C14—H14   | 120.1      | C33—C34—H34     | 119.9      |
| C14—C15—C16   | 120.6 (9)  | C34—C35—C36     | 119.7 (10) |
| C14—C15—H15   | 119.7      | C34—C35—H35     | 120.1      |
| C16—C15—H15   | 119.7      | C36—C35—H35     | 120.1      |
| C15—C16—C11   | 119.4 (9)  | C31—C36—C35     | 121.5 (9)  |
| C15—C16—H16   | 120.3      | C31—C36—H36     | 119.2      |
| C11—C16—H16   | 120.3      | C35—C36—H36     | 119.2      |
| O1—C17—C10    | 114.1 (6)  | O2—C37—C30      | 108.7 (6)  |
| O1—C17—H17A   | 108.7      | O2—C37—H37A     | 110.0      |
| C10—C17—H17A  | 108.7      | C30—C37—H37A    | 110.0      |
| O1—C17—H17B   | 108.7      | O2—C37—H37B     | 110.0      |
| C10—C17—H17B  | 108.7      | C30—C37—H37B    | 110.0      |
| H17A—C17—H17B | 107.6      | H37A—C37—H37B   | 108.3      |
|               |            |                 |            |
| C1—N1—N2—N3   | -0.7 (9)   | C21—N4—N5—N6    | 0.8 (9)    |
| C9—N1—N2—N3   | 179.5 (6)  | C29—N4—N5—N6    | 178.8 (6)  |
| N1—N2—N3—C2   | 0.9 (8)    | N4—N5—N6—C22    | -0.6 (8)   |
| N2—N1—C1—C2   | 0.2 (9)    | N5—N4—C21—C22   | -0.6 (10)  |
| C9—N1—C1—C2   | 180.0 (7)  | C29—N4—C21—C22  | -178.4 (7) |
| N1—C1—C2—N3   | 0.3 (9)    | N5—N6—C22—C21   | 0.3 (9)    |
| N1—C1—C2—C3   | 179.8 (8)  | N5—N6—C22—C23   | -180.0 (7) |
| N2—N3—C2—C1   | -0.8 (9)   | N4—C21—C22—N6   | 0.2 (9)    |
| N2—N3—C2—C3   | 179.7 (7)  | N4—C21—C22—C23  | -179.6 (7) |
| C1—C2—C3—C8   | 170.4 (8)  | N6—C22—C23—C24  | -166.1 (7) |
| N3—C2—C3—C8   | -10.2 (12) | C21—C22—C23—C24 | 13.6 (12)  |
| C1—C2—C3—C4   | -6.0 (13)  | N6—C22—C23—C28  | 13.7 (11)  |
| N3—C2—C3—C4   | 173.4 (7)  | C21—C22—C23—C28 | -166.6 (8) |
| C8—C3—C4—C5   | 0.4 (12)   | C28—C23—C24—C25 | 1.4 (11)   |

|                 |            |                 |            |
|-----------------|------------|-----------------|------------|
| C2—C3—C4—C5     | 176.9 (7)  | C22—C23—C24—C25 | -178.8 (7) |
| C3—C4—C5—C6     | -1.0 (12)  | C23—C24—C25—C26 | -0.1 (11)  |
| C4—C5—C6—C7     | 1.9 (12)   | C24—C25—C26—C27 | -0.8 (12)  |
| C4—C5—C6—Br1    | -178.9 (6) | C24—C25—C26—Br2 | 177.7 (6)  |
| C5—C6—C7—C8     | -2.1 (12)  | C25—C26—C27—C28 | 0.2 (12)   |
| Br1—C6—C7—C8    | 178.7 (6)  | Br2—C26—C27—C28 | -178.2 (6) |
| C6—C7—C8—C3     | 1.5 (12)   | C26—C27—C28—C23 | 1.1 (11)   |
| C4—C3—C8—C7     | -0.6 (12)  | C24—C23—C28—C27 | -1.9 (11)  |
| C2—C3—C8—C7     | -176.9 (7) | C22—C23—C28—C27 | 178.3 (7)  |
| N2—N1—C9—C10    | -99.4 (8)  | N5—N4—C29—C30   | 93.8 (8)   |
| C1—N1—C9—C10    | 80.9 (10)  | C21—N4—C29—C30  | -88.5 (10) |
| N1—C9—C10—C11   | -164.4 (6) | N4—C29—C30—C31  | -166.8 (6) |
| N1—C9—C10—C17   | 73.3 (8)   | N4—C29—C30—C37  | 69.5 (8)   |
| C9—C10—C11—C12  | -40.8 (10) | C29—C30—C31—C36 | -21.5 (9)  |
| C17—C10—C11—C12 | 80.5 (9)   | C37—C30—C31—C36 | 103.0 (8)  |
| C9—C10—C11—C16  | 140.9 (7)  | C29—C30—C31—C32 | 158.8 (7)  |
| C17—C10—C11—C16 | -97.9 (8)  | C37—C30—C31—C32 | -76.7 (9)  |
| C16—C11—C12—C13 | -1.6 (13)  | C36—C31—C32—C33 | -0.1 (12)  |
| C10—C11—C12—C13 | -179.9 (8) | C30—C31—C32—C33 | 179.6 (7)  |
| C11—C12—C13—C14 | 1.3 (16)   | C31—C32—C33—C34 | 1.6 (14)   |
| C12—C13—C14—C15 | 0.1 (16)   | C32—C33—C34—C35 | -1.7 (15)  |
| C13—C14—C15—C16 | -1.3 (16)  | C33—C34—C35—C36 | 0.4 (15)   |
| C14—C15—C16—C11 | 1.0 (15)   | C32—C31—C36—C35 | -1.3 (11)  |
| C12—C11—C16—C15 | 0.5 (13)   | C30—C31—C36—C35 | 179.1 (7)  |
| C10—C11—C16—C15 | 178.9 (8)  | C34—C35—C36—C31 | 1.2 (13)   |
| C11—C10—C17—O1  | 65.9 (8)   | C29—C30—C37—O2  | 58.8 (9)   |
| C9—C10—C17—O1   | -172.1 (6) | C31—C30—C37—O2  | -64.0 (8)  |

**Table S3. Hydrogen-bond parameters**

| $D-H\cdots A$                   | $D-H$ (Å) | $H\cdots A$ (Å) | $D\cdots A$ (Å) | $D-H\cdots A$ (°) |
|---------------------------------|-----------|-----------------|-----------------|-------------------|
| O1—H1 $\cdots$ O2               | 0.84      | 2.36            | 2.947 (8)       | 127.3             |
| N3—H3 $\cdots$ Cl1              | 0.84 (9)  | 2.16 (9)        | 2.985 (7)       | 169 (9)           |
| N6—H6 $\cdots$ Cl2 <sup>i</sup> | 0.95 (9)  | 2.01 (9)        | 2.948 (6)       | 169 (8)           |
| O2—H2 $\cdots$ Cl2              | 0.84      | 2.42            | 3.217 (7)       | 157.7             |

Symmetry code(s): (i)  $-x+2, y-1/2, -z+1/2$ .

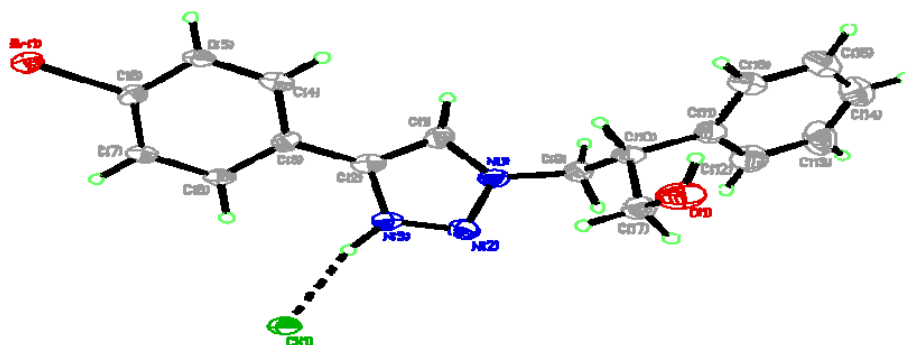

Figure S16. Perspective views showing 50% probability displacement

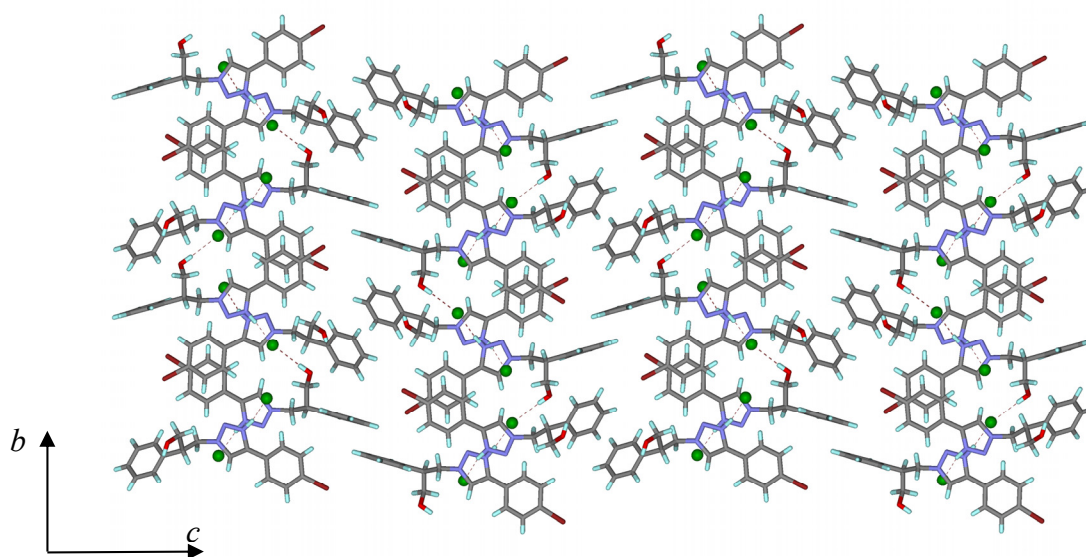

Figure S17. Three-dimensional supramolecular architecture viewed along the *a*-axis direction.

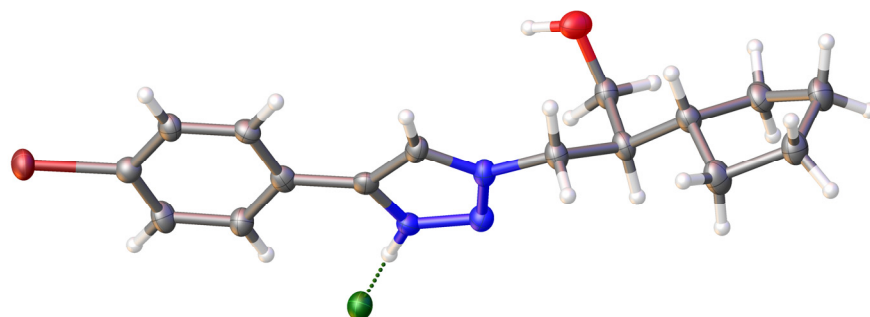

**260**

A crystal mounted on a diffractometer was collected data at 100 K. The intensities of the reflections were collected by means of a Bruker APEX DUO CCD diffractometer ( $\text{Cu}_{K\alpha}$  radiation,  $\lambda=1.54178 \text{ \AA}$ ), and equipped with an Oxford Cryosystems nitrogen flow apparatus. The collection method involved  $1.0^\circ$  scans in  $\omega$  at  $-30^\circ$ ,  $-55^\circ$ ,  $-80^\circ$ ,  $30^\circ$ ,  $55^\circ$ ,  $80^\circ$  and  $115^\circ$  in  $2\theta$ . Data integration down to  $0.84 \text{ \AA}$  resolution was carried out using SAINT V8.37 A<sup>25</sup> with reflection spot size optimization. Absorption corrections were made with the program SADABS.<sup>25</sup> The structure was solved by the Intrinsic Phasing methods and refined by least-squares methods again  $F^2$  using SHELXT-2014<sup>26</sup> and SHELXL-2014<sup>27</sup> with OLEX 2 interface.<sup>28</sup> Non-hydrogen atoms were refined anisotropically, and hydrogen atoms were allowed to ride on the respective atoms. Crystal data as well as details of data collection and refinement are summarized in Table S4, geometric parameters are shown in Table S5, and hydrogen-bond parameters are listed in Table S6. The Ortep plots produced with SHELXL-2014 program, and the other drawings were produced with Accelrys DS Visualizer 2.0.<sup>29</sup>

**Table S4. Experimental details**

|                             |                                                    |
|-----------------------------|----------------------------------------------------|
|                             | DAS-VI-67                                          |
| Crystal data                |                                                    |
| Chemical formula            | $\text{C}_{16}\text{H}_{21}\text{BrClN}_3\text{O}$ |
| $M_r$                       | 386.72                                             |
| Crystal system, space group | Monoclinic, $P2_1$                                 |
| Temperature (K)             | 100                                                |
| $a, b, c$ (Å)               | 7.0227 (3), 15.3766 (6), 15.8486 (6)               |
| $\beta$ (°)                 | 99.589 (3)                                         |
| $V$ (Å <sup>3</sup> )       | 1687.50 (12)                                       |
| $Z$                         | 4                                                  |
| Radiation type              | Cu $K\alpha$                                       |
| $\mu$ (mm <sup>-1</sup> )   | 4.82                                               |
| Crystal size (mm)           | $0.06 \times 0.01 \times 0.01$                     |
| Data collection             |                                                    |
| Diffractometer              | Bruker D8 goniometer with CCD area detector        |
| Absorption correction       | Multi-scan<br>SADABS                               |

|                                                                            |                                                                        |
|----------------------------------------------------------------------------|------------------------------------------------------------------------|
| $T_{\min}, T_{\max}$                                                       | 0.510, 0.753                                                           |
| No. of measured, independent and observed [ $I > 2\sigma(I)$ ] reflections | 35039, 5720, 5367                                                      |
| $R_{\text{int}}$                                                           | 0.054                                                                  |
| $(\sin \theta/\lambda)_{\text{max}}$ ( $\text{\AA}^{-1}$ )                 | 0.595                                                                  |
| Refinement                                                                 |                                                                        |
| $R[F^2 > 2\sigma(F^2)], wR(F^2), S$                                        | 0.065, 0.171, 1.16                                                     |
| No. of reflections                                                         | 5720                                                                   |
| No. of parameters                                                          | 401                                                                    |
| No. of restraints                                                          | 1                                                                      |
| H-atom treatment                                                           | H atoms treated by a mixture of independent and constrained refinement |
| $\Delta\rho_{\text{max}}, \Delta\rho_{\text{min}}$ ( $\text{e \AA}^{-3}$ ) | 0.47, -0.66                                                            |
| Flack parameter                                                            | -0.01 (3)                                                              |
| Hooft parameter                                                            | -0.01 (2)                                                              |

Computer programs: SAINT 8.37A,<sup>25</sup> SHELXT2014,<sup>26</sup> SHELXL2014,<sup>27</sup> Bruker SHELXTL.<sup>26,27</sup>

**Table S5. Geometric parameters ( $\text{\AA}, ^\circ$ )**

|        |            |         |            |
|--------|------------|---------|------------|
| Br1—C3 | 1.881 (9)  | Br2—C23 | 1.897 (9)  |
| O1—C16 | 1.418 (11) | O2—C36  | 1.417 (12) |
| O1—H1  | 0.8568     | O2—H2A  | 0.8585     |
| N1—N2  | 1.306 (11) | N4—N5   | 1.321 (11) |
| N1—C8  | 1.351 (11) | N4—C28  | 1.355 (12) |
| N1—C9  | 1.485 (10) | N4—C29  | 1.488 (11) |
| N2—N3  | 1.329 (10) | N5—N6   | 1.319 (11) |
| N3—C7  | 1.350 (12) | N6—C27  | 1.358 (12) |
| N3—H3  | 0.9120     | N6—H6   | 0.9168     |
| C1—C2  | 1.396 (12) | C21—C26 | 1.389 (13) |
| C1—C6  | 1.401 (12) | C21—C22 | 1.389 (13) |
| C1—H1A | 0.9500     | C21—H21 | 0.9500     |
| C2—C3  | 1.397 (15) | C22—C23 | 1.385 (14) |
| C2—H2  | 0.9500     | C22—H22 | 0.9500     |
| C3—C4  | 1.385 (13) | C23—C24 | 1.387 (12) |
| C4—C5  | 1.381 (12) | C24—C25 | 1.381 (13) |
| C4—H4  | 0.9500     | C24—H24 | 0.9500     |
| C5—C6  | 1.389 (13) | C25—C26 | 1.396 (13) |

|           |            |             |            |
|-----------|------------|-------------|------------|
| C5—H5     | 0.9500     | C25—H25     | 0.9500     |
| C6—C7     | 1.474 (12) | C26—C27     | 1.475 (12) |
| C7—C8     | 1.389 (13) | C27—C28     | 1.377 (12) |
| C8—H8     | 0.9500     | C28—H28     | 0.9500     |
| C9—C10    | 1.523 (12) | C29—C30     | 1.525 (12) |
| C9—H9A    | 0.9900     | C29—H29A    | 0.9900     |
| C9—H9B    | 0.9900     | C29—H29B    | 0.9900     |
| C10—C11   | 1.530 (12) | C30—C31     | 1.526 (12) |
| C10—C16   | 1.532 (11) | C30—C36     | 1.529 (12) |
| C10—H10   | 1.0000     | C30—H30     | 1.0000     |
| C11—C15   | 1.533 (13) | C31—C35     | 1.526 (13) |
| C11—C12   | 1.537 (12) | C31—C32     | 1.547 (13) |
| C11—H11   | 1.0000     | C31—H31     | 1.0000     |
| C12—C13   | 1.539 (12) | C32—C33     | 1.541 (13) |
| C12—H12A  | 0.9900     | C32—H32A    | 0.9900     |
| C12—H12B  | 0.9900     | C32—H32B    | 0.9900     |
| C13—C14   | 1.551 (13) | C33—C34     | 1.531 (15) |
| C13—H13A  | 0.9900     | C33—H33A    | 0.9900     |
| C13—H13B  | 0.9900     | C33—H33B    | 0.9900     |
| C14—C15   | 1.520 (12) | C34—C35     | 1.520 (13) |
| C14—H14A  | 0.9900     | C34—H34A    | 0.9900     |
| C14—H14B  | 0.9900     | C34—H34B    | 0.9900     |
| C15—H15A  | 0.9900     | C35—H35A    | 0.9900     |
| C15—H15B  | 0.9900     | C35—H35B    | 0.9900     |
| C16—H16A  | 0.9900     | C36—H36A    | 0.9900     |
| C16—H16B  | 0.9900     | C36—H36B    | 0.9900     |
|           |            |             |            |
| C16—O1—H1 | 110.4      | C36—O2—H2A  | 106.1      |
| N2—N1—C8  | 113.7 (7)  | N5—N4—C28   | 113.0 (7)  |
| N2—N1—C9  | 121.4 (7)  | N5—N4—C29   | 116.9 (7)  |
| C8—N1—C9  | 124.7 (8)  | C28—N4—C29  | 129.9 (8)  |
| N1—N2—N3  | 103.6 (7)  | N6—N5—N4    | 104.0 (7)  |
| N2—N3—C7  | 113.4 (7)  | N5—N6—C27   | 112.8 (8)  |
| N2—N3—H3  | 118.8      | N5—N6—H6    | 117.0      |
| C7—N3—H3  | 127.6      | C27—N6—H6   | 130.2      |
| C2—C1—C6  | 119.5 (10) | C26—C21—C22 | 120.4 (9)  |
| C2—C1—H1A | 120.3      | C26—C21—H21 | 119.8      |

|             |           |               |           |
|-------------|-----------|---------------|-----------|
| C6—C1—H1A   | 120.3     | C22—C21—H21   | 119.8     |
| C1—C2—C3    | 119.5 (9) | C23—C22—C21   | 118.7 (9) |
| C1—C2—H2    | 120.3     | C23—C22—H22   | 120.7     |
| C3—C2—H2    | 120.3     | C21—C22—H22   | 120.7     |
| C4—C3—C2    | 120.7 (9) | C22—C23—C24   | 121.4 (9) |
| C4—C3—Br1   | 119.6 (7) | C22—C23—Br2   | 120.6 (7) |
| C2—C3—Br1   | 119.8 (7) | C24—C23—Br2   | 118.0 (7) |
| C5—C4—C3    | 119.8 (9) | C25—C24—C23   | 119.8 (9) |
| C5—C4—H4    | 120.1     | C25—C24—H24   | 120.1     |
| C3—C4—H4    | 120.1     | C23—C24—H24   | 120.1     |
| C4—C5—C6    | 120.5 (9) | C24—C25—C26   | 119.5 (9) |
| C4—C5—H5    | 119.8     | C24—C25—H25   | 120.3     |
| C6—C5—H5    | 119.8     | C26—C25—H25   | 120.3     |
| C5—C6—C1    | 120.1 (9) | C21—C26—C25   | 120.2 (9) |
| C5—C6—C7    | 119.3 (8) | C21—C26—C27   | 121.8 (8) |
| C1—C6—C7    | 120.6 (9) | C25—C26—C27   | 117.9 (8) |
| N3—C7—C8    | 104.3 (7) | N6—C27—C28    | 105.1 (8) |
| N3—C7—C6    | 126.0 (8) | N6—C27—C26    | 124.6 (8) |
| C8—C7—C6    | 129.7 (8) | C28—C27—C26   | 130.2 (9) |
| N1—C8—C7    | 105.0 (8) | N4—C28—C27    | 104.9 (8) |
| N1—C8—H8    | 127.5     | N4—C28—H28    | 127.5     |
| C7—C8—H8    | 127.5     | C27—C28—H28   | 127.5     |
| N1—C9—C10   | 116.0 (7) | N4—C29—C30    | 114.4 (7) |
| N1—C9—H9A   | 108.3     | N4—C29—H29A   | 108.7     |
| C10—C9—H9A  | 108.3     | C30—C29—H29A  | 108.7     |
| N1—C9—H9B   | 108.3     | N4—C29—H29B   | 108.7     |
| C10—C9—H9B  | 108.3     | C30—C29—H29B  | 108.7     |
| H9A—C9—H9B  | 107.4     | H29A—C29—H29B | 107.6     |
| C9—C10—C11  | 106.8 (7) | C29—C30—C31   | 106.6 (8) |
| C9—C10—C16  | 111.7 (7) | C29—C30—C36   | 112.1 (7) |
| C11—C10—C16 | 113.4 (7) | C31—C30—C36   | 114.4 (8) |
| C9—C10—H10  | 108.3     | C29—C30—H30   | 107.8     |
| C11—C10—H10 | 108.3     | C31—C30—H30   | 107.8     |
| C16—C10—H10 | 108.3     | C36—C30—H30   | 107.8     |
| C10—C11—C15 | 115.8 (8) | C35—C31—C30   | 116.5 (8) |
| C10—C11—C12 | 114.4 (8) | C35—C31—C32   | 103.5 (8) |
| C15—C11—C12 | 102.1 (7) | C30—C31—C32   | 113.6 (8) |



|               |           |               |            |
|---------------|-----------|---------------|------------|
| C10—C11—H11   | 108.1     | C35—C31—H31   | 107.6      |
| C15—C11—H11   | 108.1     | C30—C31—H31   | 107.6      |
| C12—C11—H11   | 108.1     | C32—C31—H31   | 107.6      |
| C11—C12—C13   | 104.9 (7) | C33—C32—C31   | 106.2 (8)  |
| C11—C12—H12A  | 110.8     | C33—C32—H32A  | 110.5      |
| C13—C12—H12A  | 110.8     | C31—C32—H32A  | 110.5      |
| C11—C12—H12B  | 110.8     | C33—C32—H32B  | 110.5      |
| C13—C12—H12B  | 110.8     | C31—C32—H32B  | 110.5      |
| H12A—C12—H12B | 108.8     | H32A—C32—H32B | 108.7      |
| C12—C13—C14   | 105.9 (7) | C34—C33—C32   | 105.1 (8)  |
| C12—C13—H13A  | 110.5     | C34—C33—H33A  | 110.7      |
| C14—C13—H13A  | 110.5     | C32—C33—H33A  | 110.7      |
| C12—C13—H13B  | 110.5     | C34—C33—H33B  | 110.7      |
| C14—C13—H13B  | 110.5     | C32—C33—H33B  | 110.7      |
| H13A—C13—H13B | 108.7     | H33A—C33—H33B | 108.8      |
| C15—C14—C13   | 105.8 (8) | C35—C34—C33   | 103.9 (8)  |
| C15—C14—H14A  | 110.6     | C35—C34—H34A  | 111.0      |
| C13—C14—H14A  | 110.6     | C33—C34—H34A  | 111.0      |
| C15—C14—H14B  | 110.6     | C35—C34—H34B  | 111.0      |
| C13—C14—H14B  | 110.6     | C33—C34—H34B  | 111.0      |
| H14A—C14—H14B | 108.7     | H34A—C34—H34B | 109.0      |
| C14—C15—C11   | 105.2 (8) | C34—C35—C31   | 102.5 (8)  |
| C14—C15—H15A  | 110.7     | C34—C35—H35A  | 111.3      |
| C11—C15—H15A  | 110.7     | C31—C35—H35A  | 111.3      |
| C14—C15—H15B  | 110.7     | C34—C35—H35B  | 111.3      |
| C11—C15—H15B  | 110.7     | C31—C35—H35B  | 111.3      |
| H15A—C15—H15B | 108.8     | H35A—C35—H35B | 109.2      |
| O1—C16—C10    | 110.2 (7) | O2—C36—C30    | 111.0 (8)  |
| O1—C16—H16A   | 109.6     | O2—C36—H36A   | 109.4      |
| C10—C16—H16A  | 109.6     | C30—C36—H36A  | 109.4      |
| O1—C16—H16B   | 109.6     | O2—C36—H36B   | 109.4      |
| C10—C16—H16B  | 109.6     | C30—C36—H36B  | 109.4      |
| H16A—C16—H16B | 108.1     | H36A—C36—H36B | 108.0      |
|               |           |               |            |
| C8—N1—N2—N3   | 0.7 (9)   | C28—N4—N5—N6  | -0.5 (9)   |
| C9—N1—N2—N3   | 176.0 (7) | C29—N4—N5—N6  | -176.0 (7) |
| N1—N2—N3—C7   | -0.3 (9)  | N4—N5—N6—C27  | -0.6 (9)   |

|                 |            |                 |            |
|-----------------|------------|-----------------|------------|
| C6—C1—C2—C3     | -1.1 (13)  | C26—C21—C22—C23 | 0.9 (15)   |
| C1—C2—C3—C4     | 1.4 (14)   | C21—C22—C23—C24 | -0.8 (15)  |
| C1—C2—C3—Br1    | -178.4 (6) | C21—C22—C23—Br2 | 178.6 (6)  |
| C2—C3—C4—C5     | -0.4 (13)  | C22—C23—C24—C25 | 0.0 (15)   |
| Br1—C3—C4—C5    | 179.3 (6)  | Br2—C23—C24—C25 | -179.4 (7) |
| C3—C4—C5—C6     | -0.9 (13)  | C23—C24—C25—C26 | 0.6 (14)   |
| C4—C5—C6—C1     | 1.2 (13)   | C22—C21—C26—C25 | -0.3 (14)  |
| C4—C5—C6—C7     | -178.9 (7) | C22—C21—C26—C27 | -178.8 (8) |
| C2—C1—C6—C5     | -0.2 (13)  | C24—C25—C26—C21 | -0.5 (14)  |
| C2—C1—C6—C7     | 179.9 (7)  | C24—C25—C26—C27 | 178.1 (8)  |
| N2—N3—C7—C8     | -0.2 (9)   | N5—N6—C27—C28   | 1.3 (10)   |
| N2—N3—C7—C6     | -179.3 (7) | N5—N6—C27—C26   | -179.6 (7) |
| C5—C6—C7—N3     | -176.7 (8) | C21—C26—C27—N6  | -7.7 (14)  |
| C1—C6—C7—N3     | 3.2 (12)   | C25—C26—C27—N6  | 173.8 (9)  |
| C5—C6—C7—C8     | 4.5 (13)   | C21—C26—C27—C28 | 171.1 (9)  |
| C1—C6—C7—C8     | -175.6 (8) | C25—C26—C27—C28 | -7.4 (14)  |
| N2—N1—C8—C7     | -0.8 (9)   | N5—N4—C28—C27   | 1.3 (9)    |
| C9—N1—C8—C7     | -175.9 (7) | C29—N4—C28—C27  | 176.1 (8)  |
| N3—C7—C8—N1     | 0.6 (8)    | N6—C27—C28—N4   | -1.5 (9)   |
| C6—C7—C8—N1     | 179.6 (7)  | C26—C27—C28—N4  | 179.5 (8)  |
| N2—N1—C9—C10    | 38.5 (11)  | N5—N4—C29—C30   | -132.4 (8) |
| C8—N1—C9—C10    | -146.8 (8) | C28—N4—C29—C30  | 53.0 (12)  |
| N1—C9—C10—C11   | 173.3 (7)  | N4—C29—C30—C31  | 173.3 (7)  |
| N1—C9—C10—C16   | 48.8 (11)  | N4—C29—C30—C36  | 47.5 (11)  |
| C9—C10—C11—C15  | -173.6 (8) | C29—C30—C31—C35 | -175.5 (8) |
| C16—C10—C11—C15 | -50.1 (11) | C36—C30—C31—C35 | -51.0 (12) |
| C9—C10—C11—C12  | 68.1 (10)  | C29—C30—C31—C32 | 64.2 (11)  |
| C16—C10—C11—C12 | -168.4 (8) | C36—C30—C31—C32 | -171.3 (8) |
| C10—C11—C12—C13 | 163.3 (8)  | C35—C31—C32—C33 | 21.9 (11)  |
| C15—C11—C12—C13 | 37.4 (10)  | C30—C31—C32—C33 | 149.2 (9)  |
| C11—C12—C13—C14 | -21.7 (11) | C31—C32—C33—C34 | 4.3 (11)   |
| C12—C13—C14—C15 | -2.7 (11)  | C32—C33—C34—C35 | -29.1 (12) |
| C13—C14—C15—C11 | 26.3 (11)  | C33—C34—C35—C31 | 43.0 (11)  |
| C10—C11—C15—C14 | -164.4 (8) | C30—C31—C35—C34 | -165.3 (9) |
| C12—C11—C15—C14 | -39.5 (10) | C32—C31—C35—C34 | -39.8 (10) |
| C9—C10—C16—O1   | 51.5 (10)  | C29—C30—C36—O2  | 50.0 (11)  |
| C11—C10—C16—O1  | -69.2 (10) | C31—C30—C36—O2  | -71.4 (10) |

**Table S6. Hydrogen-bond parameters**

| $D-H\cdots A$                     | $D-H$ (Å) | $H\cdots A$ (Å) | $D\cdots A$ (Å) | $D-H\cdots A$ (°) |
|-----------------------------------|-----------|-----------------|-----------------|-------------------|
| O1—H1 $\cdots$ Cl2 <sup>i</sup>   | 0.86      | 2.32            | 3.116 (7)       | 155.4             |
| N6—H6 $\cdots$ Cl2                | 0.92      | 2.11            | 3.018 (9)       | 170.2             |
| O2—H2A $\cdots$ Cl1 <sup>ii</sup> | 0.86      | 2.41            | 3.180 (7)       | 150.0             |
| N3—H3 $\cdots$ Cl1                | 0.91      | 2.10            | 3.011 (7)       | 176.0             |

Symmetry code(s): (i)  $-x, y-1/2, -z+1$ ; (ii)  $-x, y+1/2, -z+1$ .

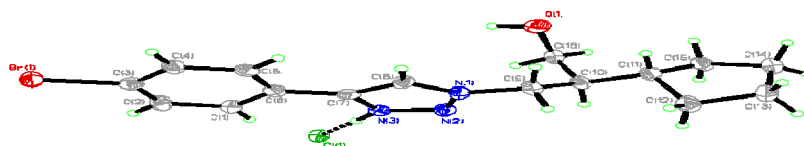

**Figure S18.** Perspective views showing 50% probability displacement

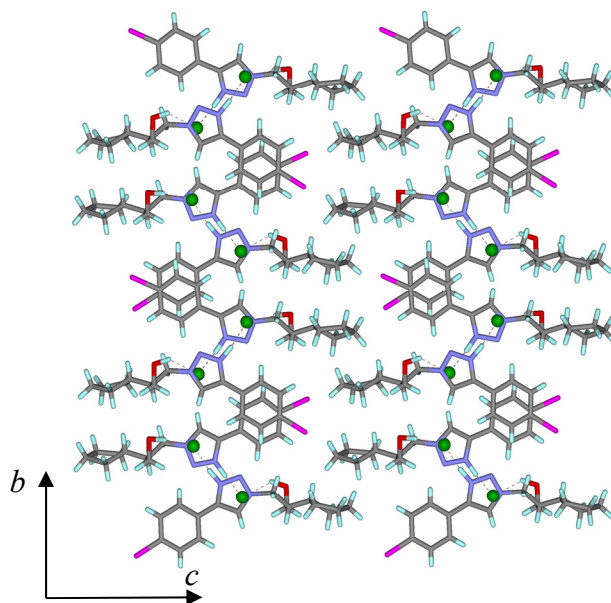

**Figure S19.** Three-dimensional supramolecular architecture viewed along the  $a$ -axis direction.

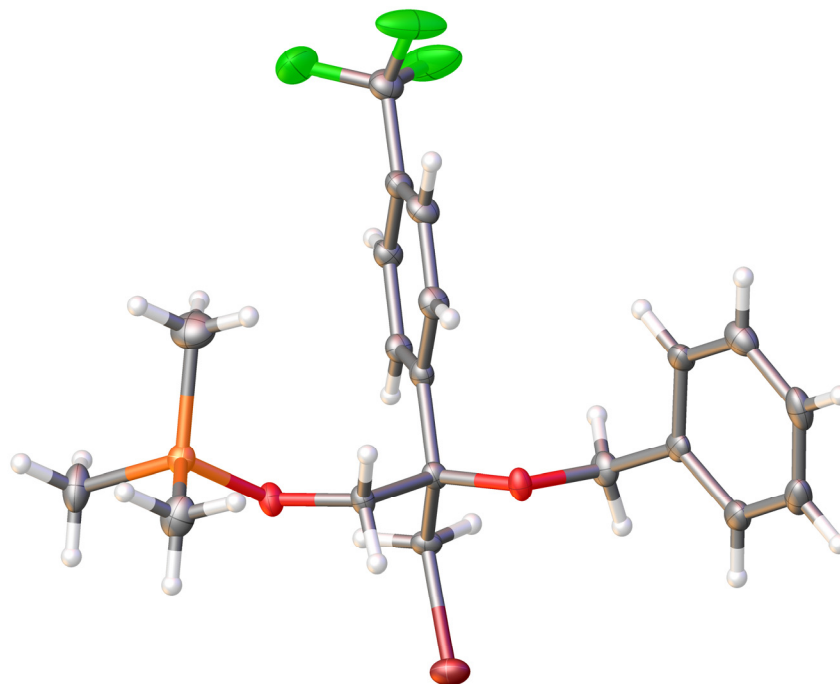

**2t**

**X-ray Crystallography:** A crystal mounted on a diffractometer was collected data at 100 K. The intensities of the reflections were collected by means of a Bruker APEX II CCD diffractometer ( $\text{MoK}\alpha$  radiation,  $\lambda=0.71073 \text{ \AA}$ ), and equipped with an Oxford Cryosystems nitrogen flow apparatus. The collection method involved  $0.5^\circ$  scans in  $\omega$  at  $28^\circ$  in  $2\theta$ . Data integration down to  $0.78 \text{ \AA}$  resolution was carried out using SAINT V8.37A<sup>30</sup> with reflection spot size optimization. Absorption corrections were made with the program SADABS.<sup>30</sup> The structure was solved by the Intrinsic Phasing methods and refined by least-squares methods against  $F^2$  using SHELXT-2014<sup>26</sup> and SHELXL-2014<sup>27</sup> with OLEX 2 interface.<sup>28</sup> Non-hydrogen atoms were refined anisotropically, and hydrogen atoms were allowed to ride on the respective atoms. Crystal data as well as details of data collection and refinement are summarized in Table S7 and geometric parameters are shown in Table S8. The Ortep plots produced with SHELXL-2014 program, and the other drawings were produced with Accelrys DS Visualizer 2.0.<sup>29</sup>

**Table S7. Experimental details**

|                                      |                                                             |
|--------------------------------------|-------------------------------------------------------------|
|                                      | DAS-III-249-1                                               |
| Crystal data                         |                                                             |
| Chemical formula                     | $\text{C}_{20}\text{H}_{24}\text{BrF}_3\text{O}_2\text{Si}$ |
| $M_r$                                | 461.30                                                      |
| Crystal system, space group          | Triclinic, $P1$                                             |
| Temperature (K)                      | 100                                                         |
| $a, b, c$ ( $\text{\AA}$ )           | 9.7525 (2), 10.9189 (2), 11.7345 (2)                        |
| $\alpha, \beta, \gamma$ ( $^\circ$ ) | 115.1170 (11), 96.8758 (12), 106.1458 (11)                  |
| $V$ ( $\text{\AA}^3$ )               | 1045.39 (4)                                                 |
| $Z$                                  | 2                                                           |

|                                                                            |                                                                                                                                      |
|----------------------------------------------------------------------------|--------------------------------------------------------------------------------------------------------------------------------------|
| Radiation type                                                             | Mo $K\alpha$                                                                                                                         |
| $\mu$ (mm <sup>-1</sup> )                                                  | 2.06                                                                                                                                 |
| Crystal size (mm)                                                          | 0.20 × 0.16 × 0.12                                                                                                                   |
| Data collection                                                            |                                                                                                                                      |
| Diffractometer                                                             | Bruker D8 goniometer with CCD area detector                                                                                          |
| Absorption correction                                                      | Multi-scan<br><i>SADABS</i>                                                                                                          |
| $T_{\min}$ , $T_{\max}$                                                    | 0.578, 0.647                                                                                                                         |
| No. of measured, independent and observed [ $I > 2\sigma(I)$ ] reflections | 41662, 9165, 8882                                                                                                                    |
| $R_{\text{int}}$                                                           | 0.023                                                                                                                                |
| $(\sin \theta/\lambda)_{\text{max}}$ (Å <sup>-1</sup> )                    | 0.641                                                                                                                                |
| Refinement                                                                 |                                                                                                                                      |
| $R[F^2 > 2\sigma(F^2)]$ , $wR(F^2)$ , $S$                                  | 0.023, 0.059, 1.03                                                                                                                   |
| No. of reflections                                                         | 9165                                                                                                                                 |
| No. of parameters                                                          | 550                                                                                                                                  |
| No. of restraints                                                          | 310                                                                                                                                  |
| H-atom treatment                                                           | H-atom parameters constrained                                                                                                        |
| $\Delta\rho_{\text{max}}$ , $\Delta\rho_{\text{min}}$ (e Å <sup>-3</sup> ) | 0.59, -0.27                                                                                                                          |
| Absolute structure                                                         | Flack $x$ determined using 4241 quotients $[(I^+)-(I^-)]/[(I^+)+(I^-)]$ (Parsons, Flack and Wagner, Acta Cryst. B69 (2013) 249-259). |
| Absolute structure parameter                                               | 0.005 (2)                                                                                                                            |

Computer programs: *SAINT* 8.37A,<sup>25</sup> *SHELXT2014*,<sup>26</sup> *SHELXL2014*,<sup>27</sup> Bruker *SHELXTL*.<sup>26,27</sup>

**Table S8. Geometric parameters (Å, °)**

|         |           |         |           |
|---------|-----------|---------|-----------|
| Br1—C16 | 1.944 (3) | Si2—C38 | 1.860 (4) |
| Si1—O2  | 1.663 (2) | O3—C27  | 1.424 (3) |
| Si1—C20 | 1.849 (3) | O3—C28  | 1.436 (3) |
| Si1—C19 | 1.856 (3) | O4—C37  | 1.423 (3) |
| Si1—C18 | 1.857 (4) | C21—C22 | 1.389 (4) |
| F1—C15  | 1.319 (4) | C21—C26 | 1.391 (4) |
| F2—C15  | 1.336 (4) | C21—H21 | 0.9500    |
| F3—C15  | 1.319 (4) | C22—C23 | 1.386 (5) |
| O1—C8   | 1.422 (3) | C22—H22 | 0.9500    |
| O1—C7   | 1.438 (3) | C23—C24 | 1.388 (5) |

|          |           |          |            |
|----------|-----------|----------|------------|
| O2—C17   | 1.418 (3) | C23—H23  | 0.9500     |
| C1—C2    | 1.376 (5) | C24—C25  | 1.395 (4)  |
| C1—C6    | 1.400 (4) | C24—H24  | 0.9500     |
| C1—H1    | 0.9500    | C25—C26  | 1.391 (4)  |
| C2—C3    | 1.383 (5) | C25—H25  | 0.9500     |
| C2—H2    | 0.9500    | C26—C27  | 1.504 (4)  |
| C3—C4    | 1.379 (5) | C27—H27A | 0.9900     |
| C3—H3    | 0.9500    | C27—H27B | 0.9900     |
| C4—C5    | 1.392 (5) | C28—C36  | 1.523 (4)  |
| C4—H4    | 0.9500    | C28—C29  | 1.535 (4)  |
| C5—C6    | 1.391 (4) | C28—C37  | 1.536 (4)  |
| C5—H5    | 0.9500    | C29—C34  | 1.395 (4)  |
| C6—C7    | 1.499 (4) | C29—C30  | 1.400 (4)  |
| C7—H7A   | 0.9900    | C30—C31  | 1.377 (4)  |
| C7—H7B   | 0.9900    | C30—H30  | 0.9500     |
| C8—C16   | 1.529 (4) | C31—C32  | 1.394 (4)  |
| C8—C9    | 1.534 (4) | C31—H31  | 0.9500     |
| C8—C17   | 1.540 (4) | C32—C33  | 1.388 (4)  |
| C9—C14   | 1.392 (4) | C32—C35B | 1.487 (4)  |
| C9—C10   | 1.397 (4) | C32—C35  | 1.487 (4)  |
| C10—C11  | 1.383 (4) | C32—C35A | 1.487 (4)  |
| C10—H10  | 0.9500    | C33—C34  | 1.384 (4)  |
| C11—C12  | 1.385 (4) | C33—H33  | 0.9500     |
| C11—H11  | 0.9500    | C34—H34  | 0.9500     |
| C12—C13  | 1.394 (4) | C35—F4   | 1.320 (10) |
| C12—C15  | 1.495 (4) | C35—F6   | 1.324 (8)  |
| C13—C14  | 1.386 (4) | C35—F5   | 1.396 (8)  |
| C13—H13  | 0.9500    | C35A—F4A | 1.309 (18) |
| C14—H14  | 0.9500    | C35A—F5A | 1.375 (19) |
| C16—H16A | 0.9900    | C35A—F6A | 1.392 (17) |
| C16—H16B | 0.9900    | C35B—F5B | 1.223 (13) |
| C17—H17A | 0.9900    | C35B—F4B | 1.343 (15) |
| C17—H17B | 0.9900    | C35B—F6B | 1.430 (11) |
| C18—H18A | 0.9800    | C36—H36A | 0.9900     |
| C18—H18B | 0.9800    | C36—H36B | 0.9900     |
| C18—H18C | 0.9800    | C37—H37A | 0.9900     |
| C19—H19A | 0.9800    | C37—H37B | 0.9900     |

|             |             |               |           |
|-------------|-------------|---------------|-----------|
| C19—H19B    | 0.9800      | C38—H38A      | 0.9800    |
| C19—H19C    | 0.9800      | C38—H38B      | 0.9800    |
| C20—H20A    | 0.9800      | C38—H38C      | 0.9800    |
| C20—H20B    | 0.9800      | C39—H39A      | 0.9800    |
| C20—H20C    | 0.9800      | C39—H39B      | 0.9800    |
| Br2—C36     | 1.953 (3)   | C39—H39C      | 0.9800    |
| Si2—O4      | 1.659 (2)   | C40—H40A      | 0.9800    |
| Si2—C40     | 1.849 (3)   | C40—H40B      | 0.9800    |
| Si2—C39     | 1.858 (4)   | C40—H40C      | 0.9800    |
|             |             |               |           |
| O2—Si1—C20  | 105.11 (13) | C22—C21—C26   | 120.5 (3) |
| O2—Si1—C19  | 110.23 (14) | C22—C21—H21   | 119.8     |
| C20—Si1—C19 | 111.16 (17) | C26—C21—H21   | 119.8     |
| O2—Si1—C18  | 109.67 (14) | C23—C22—C21   | 120.1 (3) |
| C20—Si1—C18 | 111.12 (19) | C23—C22—H22   | 119.9     |
| C19—Si1—C18 | 109.48 (17) | C21—C22—H22   | 119.9     |
| C8—O1—C7    | 117.1 (2)   | C22—C23—C24   | 119.7 (3) |
| C17—O2—Si1  | 121.34 (18) | C22—C23—H23   | 120.1     |
| C2—C1—C6    | 120.9 (3)   | C24—C23—H23   | 120.1     |
| C2—C1—H1    | 119.6       | C23—C24—C25   | 120.3 (3) |
| C6—C1—H1    | 119.6       | C23—C24—H24   | 119.9     |
| C1—C2—C3    | 119.8 (3)   | C25—C24—H24   | 119.9     |
| C1—C2—H2    | 120.1       | C26—C25—C24   | 120.0 (3) |
| C3—C2—H2    | 120.1       | C26—C25—H25   | 120.0     |
| C4—C3—C2    | 120.5 (3)   | C24—C25—H25   | 120.0     |
| C4—C3—H3    | 119.8       | C21—C26—C25   | 119.4 (3) |
| C2—C3—H3    | 119.8       | C21—C26—C27   | 117.9 (3) |
| C3—C4—C5    | 119.8 (3)   | C25—C26—C27   | 122.7 (3) |
| C3—C4—H4    | 120.1       | O3—C27—C26    | 110.2 (2) |
| C5—C4—H4    | 120.1       | O3—C27—H27A   | 109.6     |
| C6—C5—C4    | 120.5 (3)   | C26—C27—H27A  | 109.6     |
| C6—C5—H5    | 119.8       | O3—C27—H27B   | 109.6     |
| C4—C5—H5    | 119.8       | C26—C27—H27B  | 109.6     |
| C5—C6—C1    | 118.6 (3)   | H27A—C27—H27B | 108.1     |
| C5—C6—C7    | 121.3 (3)   | O3—C28—C36    | 105.6 (2) |
| C1—C6—C7    | 119.8 (3)   | O3—C28—C29    | 110.7 (2) |
| O1—C7—C6    | 105.7 (2)   | C36—C28—C29   | 106.7 (2) |

|             |             |              |            |
|-------------|-------------|--------------|------------|
| O1—C7—H7A   | 110.6       | O3—C28—C37   | 108.6 (2)  |
| C6—C7—H7A   | 110.6       | C36—C28—C37  | 111.1 (2)  |
| O1—C7—H7B   | 110.6       | C29—C28—C37  | 113.8 (2)  |
| C6—C7—H7B   | 110.6       | C34—C29—C30  | 118.6 (3)  |
| H7A—C7—H7B  | 108.7       | C34—C29—C28  | 122.8 (2)  |
| O1—C8—C16   | 113.2 (2)   | C30—C29—C28  | 118.6 (2)  |
| O1—C8—C9    | 109.7 (2)   | C31—C30—C29  | 121.0 (3)  |
| C16—C8—C9   | 111.0 (2)   | C31—C30—H30  | 119.5      |
| O1—C8—C17   | 101.7 (2)   | C29—C30—H30  | 119.5      |
| C16—C8—C17  | 110.7 (2)   | C30—C31—C32  | 119.7 (3)  |
| C9—C8—C17   | 110.3 (2)   | C30—C31—H31  | 120.2      |
| C14—C9—C10  | 118.1 (3)   | C32—C31—H31  | 120.2      |
| C14—C9—C8   | 123.8 (3)   | C33—C32—C31  | 120.1 (3)  |
| C10—C9—C8   | 118.1 (3)   | C33—C32—C35B | 120.3 (3)  |
| C11—C10—C9  | 121.0 (3)   | C31—C32—C35B | 119.6 (3)  |
| C11—C10—H10 | 119.5       | C33—C32—C35  | 120.3 (3)  |
| C9—C10—H10  | 119.5       | C31—C32—C35  | 119.6 (3)  |
| C10—C11—C12 | 120.4 (3)   | C33—C32—C35A | 120.3 (3)  |
| C10—C11—H11 | 119.8       | C31—C32—C35A | 119.6 (3)  |
| C12—C11—H11 | 119.8       | C34—C33—C32  | 120.0 (3)  |
| C11—C12—C13 | 119.4 (3)   | C34—C33—H33  | 120.0      |
| C11—C12—C15 | 121.9 (3)   | C32—C33—H33  | 120.0      |
| C13—C12—C15 | 118.7 (3)   | C33—C34—C29  | 120.7 (3)  |
| C14—C13—C12 | 119.9 (3)   | C33—C34—H34  | 119.7      |
| C14—C13—H13 | 120.0       | C29—C34—H34  | 119.7      |
| C12—C13—H13 | 120.0       | F4—C35—F6    | 110.4 (7)  |
| C13—C14—C9  | 121.2 (3)   | F4—C35—F5    | 103.2 (6)  |
| C13—C14—H14 | 119.4       | F6—C35—F5    | 101.9 (7)  |
| C9—C14—H14  | 119.4       | F4—C35—C32   | 114.8 (6)  |
| F3—C15—F1   | 108.5 (3)   | F6—C35—C32   | 115.0 (4)  |
| F3—C15—F2   | 104.2 (3)   | F5—C35—C32   | 110.0 (4)  |
| F1—C15—F2   | 105.0 (3)   | F4A—C35A—F5A | 105.0 (14) |
| F3—C15—C12  | 113.4 (3)   | F4A—C35A—F6A | 107.9 (14) |
| F1—C15—C12  | 113.0 (3)   | F5A—C35A—F6A | 96.4 (14)  |
| F2—C15—C12  | 112.0 (3)   | F4A—C35A—C32 | 119.5 (11) |
| C8—C16—Br1  | 113.01 (19) | F5A—C35A—C32 | 111.5 (12) |
| C8—C16—H16A | 109.0       | F6A—C35A—C32 | 113.8 (11) |



|               |             |               |             |
|---------------|-------------|---------------|-------------|
| Br1—C16—H16A  | 109.0       | F5B—C35B—F4B  | 110.3 (12)  |
| C8—C16—H16B   | 109.0       | F5B—C35B—F6B  | 110.9 (10)  |
| Br1—C16—H16B  | 109.0       | F4B—C35B—F6B  | 101.2 (9)   |
| H16A—C16—H16B | 107.8       | F5B—C35B—C32  | 116.4 (7)   |
| O2—C17—C8     | 110.6 (2)   | F4B—C35B—C32  | 110.4 (10)  |
| O2—C17—H17A   | 109.5       | F6B—C35B—C32  | 106.6 (5)   |
| C8—C17—H17A   | 109.5       | C28—C36—Br2   | 113.59 (19) |
| O2—C17—H17B   | 109.5       | C28—C36—H36A  | 108.8       |
| C8—C17—H17B   | 109.5       | Br2—C36—H36A  | 108.8       |
| H17A—C17—H17B | 108.1       | C28—C36—H36B  | 108.8       |
| Si1—C18—H18A  | 109.5       | Br2—C36—H36B  | 108.8       |
| Si1—C18—H18B  | 109.5       | H36A—C36—H36B | 107.7       |
| H18A—C18—H18B | 109.5       | O4—C37—C28    | 109.7 (2)   |
| Si1—C18—H18C  | 109.5       | O4—C37—H37A   | 109.7       |
| H18A—C18—H18C | 109.5       | C28—C37—H37A  | 109.7       |
| H18B—C18—H18C | 109.5       | O4—C37—H37B   | 109.7       |
| Si1—C19—H19A  | 109.5       | C28—C37—H37B  | 109.7       |
| Si1—C19—H19B  | 109.5       | H37A—C37—H37B | 108.2       |
| H19A—C19—H19B | 109.5       | Si2—C38—H38A  | 109.5       |
| Si1—C19—H19C  | 109.5       | Si2—C38—H38B  | 109.5       |
| H19A—C19—H19C | 109.5       | H38A—C38—H38B | 109.5       |
| H19B—C19—H19C | 109.5       | Si2—C38—H38C  | 109.5       |
| Si1—C20—H20A  | 109.5       | H38A—C38—H38C | 109.5       |
| Si1—C20—H20B  | 109.5       | H38B—C38—H38C | 109.5       |
| H20A—C20—H20B | 109.5       | Si2—C39—H39A  | 109.5       |
| Si1—C20—H20C  | 109.5       | Si2—C39—H39B  | 109.5       |
| H20A—C20—H20C | 109.5       | H39A—C39—H39B | 109.5       |
| H20B—C20—H20C | 109.5       | Si2—C39—H39C  | 109.5       |
| O4—Si2—C40    | 105.62 (13) | H39A—C39—H39C | 109.5       |
| O4—Si2—C39    | 108.54 (15) | H39B—C39—H39C | 109.5       |
| C40—Si2—C39   | 112.24 (18) | Si2—C40—H40A  | 109.5       |
| O4—Si2—C38    | 109.27 (14) | Si2—C40—H40B  | 109.5       |
| C40—Si2—C38   | 111.61 (17) | H40A—C40—H40B | 109.5       |
| C39—Si2—C38   | 109.41 (19) | Si2—C40—H40C  | 109.5       |
| C27—O3—C28    | 115.1 (2)   | H40A—C40—H40C | 109.5       |
| C37—O4—Si2    | 120.28 (17) | H40B—C40—H40C | 109.5       |
|               |             |               |             |

|                 |            |                  |             |
|-----------------|------------|------------------|-------------|
| C20—Si1—O2—C17  | -171.9 (2) | C22—C21—C26—C27  | -179.8 (3)  |
| C19—Si1—O2—C17  | -52.0 (2)  | C24—C25—C26—C21  | -0.5 (5)    |
| C18—Si1—O2—C17  | 68.6 (3)   | C24—C25—C26—C27  | 179.7 (3)   |
| C6—C1—C2—C3     | -0.3 (4)   | C28—O3—C27—C26   | 166.3 (2)   |
| C1—C2—C3—C4     | 1.1 (5)    | C21—C26—C27—O3   | 169.0 (3)   |
| C2—C3—C4—C5     | -1.0 (5)   | C25—C26—C27—O3   | -11.3 (4)   |
| C3—C4—C5—C6     | 0.1 (4)    | C27—O3—C28—C36   | 167.8 (2)   |
| C4—C5—C6—C1     | 0.7 (4)    | C27—O3—C28—C29   | 52.7 (3)    |
| C4—C5—C6—C7     | -172.9 (3) | C27—O3—C28—C37   | -72.9 (3)   |
| C2—C1—C6—C5     | -0.6 (4)   | O3—C28—C29—C34   | -128.9 (3)  |
| C2—C1—C6—C7     | 173.1 (3)  | C36—C28—C29—C34  | 116.7 (3)   |
| C8—O1—C7—C6     | 159.2 (2)  | C37—C28—C29—C34  | -6.3 (4)    |
| C5—C6—C7—O1     | 95.9 (3)   | O3—C28—C29—C30   | 50.0 (3)    |
| C1—C6—C7—O1     | -77.6 (3)  | C36—C28—C29—C30  | -64.4 (3)   |
| C7—O1—C8—C16    | 59.3 (3)   | C37—C28—C29—C30  | 172.6 (2)   |
| C7—O1—C8—C9     | -65.1 (3)  | C34—C29—C30—C31  | -0.4 (4)    |
| C7—O1—C8—C17    | 178.1 (2)  | C28—C29—C30—C31  | -179.3 (3)  |
| O1—C8—C9—C14    | 130.1 (3)  | C29—C30—C31—C32  | 0.1 (5)     |
| C16—C8—C9—C14   | 4.4 (4)    | C30—C31—C32—C33  | 0.1 (5)     |
| C17—C8—C9—C14   | -118.7 (3) | C30—C31—C32—C35B | 177.6 (3)   |
| O1—C8—C9—C10    | -49.8 (3)  | C30—C31—C32—C35  | 177.6 (3)   |
| C16—C8—C9—C10   | -175.5 (2) | C30—C31—C32—C35A | 177.6 (3)   |
| C17—C8—C9—C10   | 61.4 (3)   | C31—C32—C33—C34  | 0.1 (5)     |
| C14—C9—C10—C11  | 0.4 (4)    | C35B—C32—C33—C34 | -177.5 (3)  |
| C8—C9—C10—C11   | -179.7 (3) | C35—C32—C33—C34  | -177.5 (3)  |
| C9—C10—C11—C12  | 0.2 (5)    | C35A—C32—C33—C34 | -177.5 (3)  |
| C10—C11—C12—C13 | -1.1 (4)   | C32—C33—C34—C29  | -0.4 (4)    |
| C10—C11—C12—C15 | 179.6 (3)  | C30—C29—C34—C33  | 0.5 (4)     |
| C11—C12—C13—C14 | 1.3 (4)    | C28—C29—C34—C33  | 179.4 (3)   |
| C15—C12—C13—C14 | -179.3 (3) | C33—C32—C35—F4   | -138.8 (8)  |
| C12—C13—C14—C9  | -0.8 (4)   | C31—C32—C35—F4   | 43.7 (9)    |
| C10—C9—C14—C13  | -0.1 (4)   | C33—C32—C35—F6   | -9.0 (12)   |
| C8—C9—C14—C13   | 180.0 (3)  | C31—C32—C35—F6   | 173.5 (11)  |
| C11—C12—C15—F3  | 132.3 (3)  | C33—C32—C35—F5   | 105.4 (7)   |
| C13—C12—C15—F3  | -47.0 (4)  | C31—C32—C35—F5   | -72.2 (8)   |
| C11—C12—C15—F1  | 8.3 (4)    | C33—C32—C35A—F4A | -108.7 (19) |
| C13—C12—C15—F1  | -171.0 (3) | C31—C32—C35A—F4A | 73.7 (19)   |

|                 |             |                  |             |
|-----------------|-------------|------------------|-------------|
| C11—C12—C15—F2  | -110.1 (3)  | C33—C32—C35A—F5A | 128.4 (18)  |
| C13—C12—C15—F2  | 70.6 (4)    | C31—C32—C35A—F5A | -49.1 (18)  |
| O1—C8—C16—Br1   | 52.5 (3)    | C33—C32—C35A—F6A | 21 (2)      |
| C9—C8—C16—Br1   | 176.26 (18) | C31—C32—C35A—F6A | -156.8 (19) |
| C17—C8—C16—Br1  | -60.9 (3)   | C33—C32—C35B—F5B | 74.7 (15)   |
| Si1—O2—C17—C8   | -142.0 (2)  | C31—C32—C35B—F5B | -102.9 (15) |
| O1—C8—C17—O2    | -177.4 (2)  | C33—C32—C35B—F4B | -158.7 (10) |
| C16—C8—C17—O2   | -56.9 (3)   | C31—C32—C35B—F4B | 23.8 (10)   |
| C9—C8—C17—O2    | 66.4 (3)    | C33—C32—C35B—F6B | -49.6 (10)  |
| C40—Si2—O4—C37  | 167.7 (2)   | C31—C32—C35B—F6B | 132.9 (10)  |
| C39—Si2—O4—C37  | -71.8 (2)   | O3—C28—C36—Br2   | 57.8 (2)    |
| C38—Si2—O4—C37  | 47.5 (2)    | C29—C28—C36—Br2  | 175.58 (18) |
| C26—C21—C22—C23 | -0.2 (5)    | C37—C28—C36—Br2  | -59.8 (3)   |
| C21—C22—C23—C24 | 0.2 (5)     | Si2—O4—C37—C28   | 176.23 (18) |
| C22—C23—C24—C25 | -0.3 (5)    | O3—C28—C37—O4    | -167.3 (2)  |
| C23—C24—C25—C26 | 0.5 (5)     | C36—C28—C37—O4   | -51.6 (3)   |
| C22—C21—C26—C25 | 0.4 (5)     | C29—C28—C37—O4   | 68.9 (3)    |

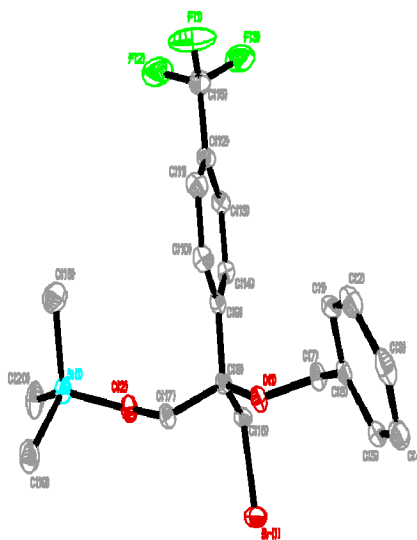

**Figure S20.** Perspective views showing 50% probability displacement

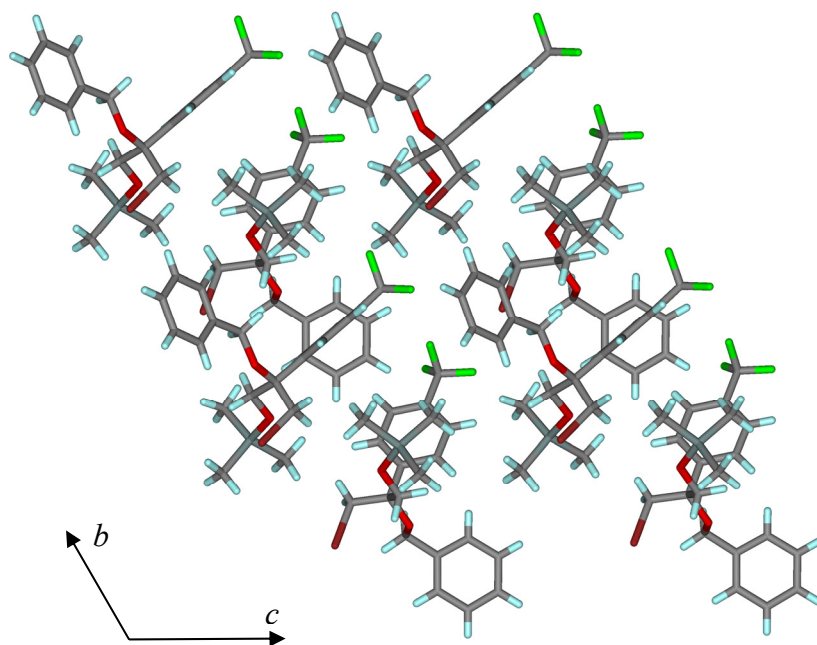

**Figure S21.** Three-dimensional supramolecular architecture viewed along the *a*-axis direction.

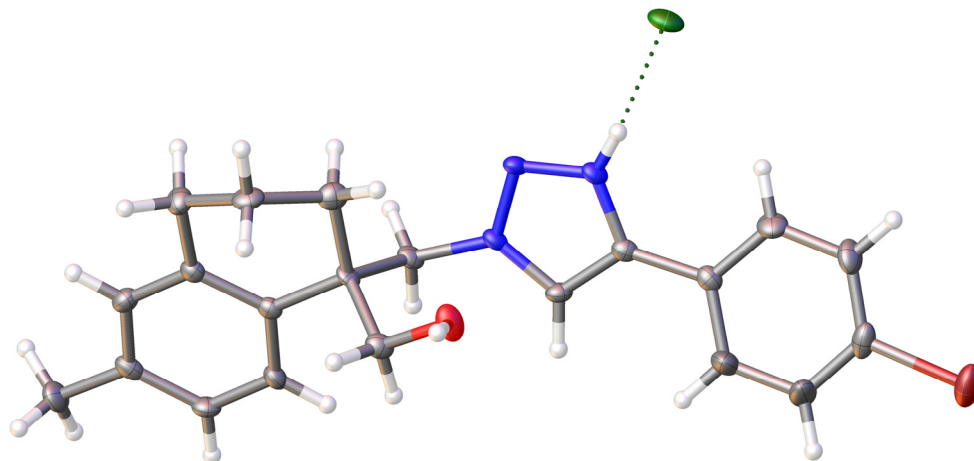

## 26u

**X-ray Crystallography:** A crystal mounted on a diffractometer was collected data at 100 K. The intensities of the reflections were collected by means of a Bruker APEX II CCD diffractometer (Mo $K\alpha$  radiation,  $\lambda=0.71073$  Å), and equipped with an Oxford Cryosystems nitrogen flow apparatus. The collection method involved  $0.5^\circ$  scans in  $\omega$  at  $28^\circ$  in  $2\theta$ . Data integration down to  $0.78$  Å resolution was carried out using SAINT V8.37A<sup>30</sup> with reflection spot size optimization. Absorption corrections were made with the program TWINABS.<sup>30</sup> The structure was solved by the Intrinsic Phasing methods and refined by least-squares methods against  $F^2$  using SHELXT-2014<sup>26</sup> and SHELXL-2014<sup>27</sup> with OLEX 2 interface.<sup>28</sup> Non-hydrogen atoms were refined anisotropically, and hydrogen atoms were allowed to ride on the respective atoms. Crystal data as well as details of data collection and refinement are summarized in Table S9, geometric parameters are shown in Table S10 and hydrogen-bond parameters are listed in Table S11. The Ortep plots produced with SHELXL-2014 program, and the other drawings were produced with Accelrys DS Visualizer 2.0.<sup>29</sup>

**Table S9. Experimental details**

|                             |                                                                      |
|-----------------------------|----------------------------------------------------------------------|
|                             | DAS-VI-88                                                            |
| Crystal data                |                                                                      |
| Chemical formula            | C <sub>23</sub> H <sub>28</sub> BrClN <sub>3</sub> O <sub>1.50</sub> |
| $M_r$                       | 485.84                                                               |
| Crystal system, space group | Monoclinic, C2                                                       |
| Temperature (K)             | 100                                                                  |
| $a, b, c$ (Å)               | 31.216 (3), 8.4388 (8), 8.5385 (8)                                   |
| $\beta$ (°)                 | 93.3905 (17)                                                         |
| $V$ (Å <sup>3</sup> )       | 2245.4 (4)                                                           |
| $Z$                         | 4                                                                    |
| Radiation type              | Mo $K\alpha$                                                         |
| $\mu$ (mm <sup>-1</sup> )   | 1.97                                                                 |
| Crystal size (mm)           | 0.14 × 0.12 × 0.06                                                   |

|                                                                            |                                                                                                                                    |
|----------------------------------------------------------------------------|------------------------------------------------------------------------------------------------------------------------------------|
| Data collection                                                            |                                                                                                                                    |
| Diffractometer                                                             | Bruker D8 goniometer with CCD area detector                                                                                        |
| Absorption correction                                                      | Multi-scan<br>twinabs                                                                                                              |
| $T_{\min}, T_{\max}$                                                       | 0.616, 0.746                                                                                                                       |
| No. of measured, independent and observed [ $I > 2\sigma(I)$ ] reflections | 6527, 6527, 6120                                                                                                                   |
| $R_{\text{int}}$                                                           | 0.032                                                                                                                              |
| $(\sin \theta/\lambda)_{\text{max}}$ ( $\text{\AA}^{-1}$ )                 | 0.641                                                                                                                              |
| Refinement                                                                 |                                                                                                                                    |
| $R[F^2 > 2\sigma(F^2)], wR(F^2), S$                                        | 0.033, 0.064, 1.04                                                                                                                 |
| No. of reflections                                                         | 6527                                                                                                                               |
| No. of parameters                                                          | 301                                                                                                                                |
| No. of restraints                                                          | 25                                                                                                                                 |
| H-atom treatment                                                           | H atoms treated by a mixture of independent and constrained refinement                                                             |
| $\Delta\rho_{\text{max}}, \Delta\rho_{\text{min}}$ ( $\text{e \AA}^{-3}$ ) | 0.48, -0.28                                                                                                                        |
| Absolute structure                                                         | Flack x determined using 1947 quotients $[(I^+)-(I^-)]/[(I^+)+(I^-)]$ (Parsons, Flack and Wagner, Acta Cryst. B69 (2013) 249-259). |
| Absolute structure parameter                                               | -0.006 (3)                                                                                                                         |

Computer programs: SAINT 8.37A,<sup>25</sup> SHELXT2014,<sup>26</sup> SHELXL2014,<sup>27</sup> Bruker SHELXTL.<sup>26,27</sup>

**Table S10. Geometric parameters ( $\text{\AA}, ^\circ$ )**

|         |           |          |           |
|---------|-----------|----------|-----------|
| Br1—C17 | 1.897 (4) | C11—H11B | 0.9900    |
| O1—C21  | 1.419 (5) | C12—C13  | 1.368 (6) |
| O1—H1   | 0.93 (5)  | C12—H12  | 0.9500    |
| N1—N2   | 1.327 (5) | C13—C14  | 1.470 (6) |
| N1—C12  | 1.341 (5) | C14—C15  | 1.383 (7) |
| N1—C11  | 1.472 (5) | C14—C19  | 1.384 (7) |
| N2—N3   | 1.319 (5) | C15—C16  | 1.381 (7) |
| N3—C13  | 1.356 (6) | C15—H15  | 0.9500    |
| N3—H3   | 0.82 (6)  | C16—C17  | 1.359 (8) |
| C1—C2   | 1.531 (6) | C16—H16  | 0.9500    |
| C1—C10  | 1.550 (6) | C17—C18  | 1.372 (7) |
| C1—H1A  | 0.9900    | C18—C19  | 1.383 (7) |
| C1—H1B  | 0.9900    | C18—H18  | 0.9500    |

|            |           |             |            |
|------------|-----------|-------------|------------|
| C2—C3      | 1.525 (6) | C19—H19     | 0.9500     |
| C2—H2A     | 0.9900    | C20—H20A    | 0.9800     |
| C2—H2B     | 0.9900    | C20—H20B    | 0.9800     |
| C3—C4      | 1.516 (6) | C20—H20C    | 0.9800     |
| C3—H3A     | 0.9900    | C21—H21A    | 0.9900     |
| C3—H3B     | 0.9900    | C21—H21B    | 0.9900     |
| C4—C9      | 1.393 (6) | C1S—C2S     | 1.519 (14) |
| C4—C5      | 1.393 (6) | C1S—H1SA    | 0.9800     |
| C5—C6      | 1.394 (6) | C1S—H1SB    | 0.9800     |
| C5—H5      | 0.9500    | C1S—H1SC    | 0.9800     |
| C6—C7      | 1.393 (7) | C2S—O1S     | 1.393 (16) |
| C6—C20     | 1.498 (7) | C2S—H2SA    | 0.9900     |
| C7—C8      | 1.400 (7) | C2S—H2SB    | 0.9900     |
| C7—H7      | 0.9500    | O1S—C3S     | 1.419 (16) |
| C8—C9      | 1.386 (7) | C3S—C4S     | 1.500 (16) |
| C8—H8      | 0.9500    | C3S—H3SA    | 0.9900     |
| C9—C10     | 1.533 (6) | C3S—H3SB    | 0.9900     |
| C10—C11    | 1.533 (6) | C4S—H4SA    | 0.9800     |
| C10—C21    | 1.549 (5) | C4S—H4SB    | 0.9800     |
| C11—H11A   | 0.9900    | C4S—H4SC    | 0.9800     |
|            |           |             |            |
| C21—O1—H1  | 108 (3)   | N3—C13—C12  | 104.5 (4)  |
| N2—N1—C12  | 112.5 (4) | N3—C13—C14  | 125.8 (4)  |
| N2—N1—C11  | 121.3 (4) | C12—C13—C14 | 129.7 (4)  |
| C12—N1—C11 | 126.2 (4) | C15—C14—C19 | 119.3 (4)  |
| N3—N2—N1   | 103.7 (3) | C15—C14—C13 | 117.7 (4)  |
| N2—N3—C13  | 113.1 (4) | C19—C14—C13 | 123.0 (4)  |
| N2—N3—H3   | 117 (4)   | C16—C15—C14 | 119.9 (5)  |
| C13—N3—H3  | 130 (4)   | C16—C15—H15 | 120.0      |
| C2—C1—C10  | 111.5 (4) | C14—C15—H15 | 120.0      |
| C2—C1—H1A  | 109.3     | C17—C16—C15 | 120.2 (5)  |
| C10—C1—H1A | 109.3     | C17—C16—H16 | 119.9      |
| C2—C1—H1B  | 109.3     | C15—C16—H16 | 119.9      |
| C10—C1—H1B | 109.3     | C16—C17—C18 | 121.0 (4)  |
| H1A—C1—H1B | 108.0     | C16—C17—Br1 | 118.6 (4)  |
| C3—C2—C1   | 109.4 (4) | C18—C17—Br1 | 120.3 (4)  |
| C3—C2—H2A  | 109.8     | C17—C18—C19 | 119.3 (5)  |

|              |           |               |            |
|--------------|-----------|---------------|------------|
| C1—C2—H2A    | 109.8     | C17—C18—H18   | 120.4      |
| C3—C2—H2B    | 109.8     | C19—C18—H18   | 120.4      |
| C1—C2—H2B    | 109.8     | C18—C19—C14   | 120.3 (5)  |
| H2A—C2—H2B   | 108.2     | C18—C19—H19   | 119.8      |
| C4—C3—C2     | 111.3 (4) | C14—C19—H19   | 119.8      |
| C4—C3—H3A    | 109.4     | C6—C20—H20A   | 109.5      |
| C2—C3—H3A    | 109.4     | C6—C20—H20B   | 109.5      |
| C4—C3—H3B    | 109.4     | H20A—C20—H20B | 109.5      |
| C2—C3—H3B    | 109.4     | C6—C20—H20C   | 109.5      |
| H3A—C3—H3B   | 108.0     | H20A—C20—H20C | 109.5      |
| C9—C4—C5     | 118.9 (4) | H20B—C20—H20C | 109.5      |
| C9—C4—C3     | 122.2 (4) | O1—C21—C10    | 113.4 (4)  |
| C5—C4—C3     | 119.0 (4) | O1—C21—H21A   | 108.9      |
| C4—C5—C6     | 123.5 (5) | C10—C21—H21A  | 108.9      |
| C4—C5—H5     | 118.2     | O1—C21—H21B   | 108.9      |
| C6—C5—H5     | 118.2     | C10—C21—H21B  | 108.9      |
| C7—C6—C5     | 116.5 (5) | H21A—C21—H21B | 107.7      |
| C7—C6—C20    | 121.7 (4) | C2S—C1S—H1SA  | 109.5      |
| C5—C6—C20    | 121.7 (5) | C2S—C1S—H1SB  | 109.5      |
| C6—C7—C8     | 120.7 (4) | H1SA—C1S—H1SB | 109.5      |
| C6—C7—H7     | 119.6     | C2S—C1S—H1SC  | 109.5      |
| C8—C7—H7     | 119.6     | H1SA—C1S—H1SC | 109.5      |
| C9—C8—C7     | 121.5 (4) | H1SB—C1S—H1SC | 109.5      |
| C9—C8—H8     | 119.2     | O1S—C2S—C1S   | 108.1 (12) |
| C7—C8—H8     | 119.2     | O1S—C2S—H2SA  | 110.1      |
| C8—C9—C4     | 118.6 (4) | C1S—C2S—H2SA  | 110.1      |
| C8—C9—C10    | 119.3 (4) | O1S—C2S—H2SB  | 110.1      |
| C4—C9—C10    | 122.1 (4) | C1S—C2S—H2SB  | 110.1      |
| C9—C10—C11   | 106.3 (3) | H2SA—C2S—H2SB | 108.4      |
| C9—C10—C21   | 107.2 (3) | C2S—O1S—C3S   | 112.8 (10) |
| C11—C10—C21  | 111.8 (4) | O1S—C3S—C4S   | 109.3 (11) |
| C9—C10—C1    | 112.7 (4) | O1S—C3S—H3SA  | 109.8      |
| C11—C10—C1   | 108.9 (3) | C4S—C3S—H3SA  | 109.8      |
| C21—C10—C1   | 109.9 (3) | O1S—C3S—H3SB  | 109.8      |
| N1—C11—C10   | 114.2 (3) | C4S—C3S—H3SB  | 109.8      |
| N1—C11—H11A  | 108.7     | H3SA—C3S—H3SB | 108.3      |
| C10—C11—H11A | 108.7     | C3S—C4S—H4SA  | 109.5      |



|               |            |                 |             |
|---------------|------------|-----------------|-------------|
| N1—C11—H11B   | 108.7      | C3S—C4S—H4SB    | 109.5       |
| C10—C11—H11B  | 108.7      | H4SA—C4S—H4SB   | 109.5       |
| H11A—C11—H11B | 107.6      | C3S—C4S—H4SC    | 109.5       |
| N1—C12—C13    | 106.2 (4)  | H4SA—C4S—H4SC   | 109.5       |
| N1—C12—H12    | 126.9      | H4SB—C4S—H4SC   | 109.5       |
| C13—C12—H12   | 126.9      |                 |             |
|               |            |                 |             |
| C12—N1—N2—N3  | 0.1 (5)    | C12—N1—C11—C10  | 99.1 (5)    |
| C11—N1—N2—N3  | -179.7 (3) | C9—C10—C11—N1   | -169.7 (3)  |
| N1—N2—N3—C13  | -0.5 (4)   | C21—C10—C11—N1  | -53.1 (5)   |
| C10—C1—C2—C3  | -63.9 (5)  | C1—C10—C11—N1   | 68.5 (5)    |
| C1—C2—C3—C4   | 53.2 (5)   | N2—N1—C12—C13   | 0.2 (5)     |
| C2—C3—C4—C9   | -19.5 (6)  | C11—N1—C12—C13  | -180.0 (4)  |
| C2—C3—C4—C5   | 158.9 (4)  | N2—N3—C13—C12   | 0.6 (5)     |
| C9—C4—C5—C6   | 2.5 (7)    | N2—N3—C13—C14   | -177.8 (4)  |
| C3—C4—C5—C6   | -175.9 (5) | N1—C12—C13—N3   | -0.5 (5)    |
| C4—C5—C6—C7   | 0.9 (7)    | N1—C12—C13—C14  | 177.9 (4)   |
| C4—C5—C6—C20  | -179.4 (5) | N3—C13—C14—C15  | 169.2 (5)   |
| C5—C6—C7—C8   | -2.6 (7)   | C12—C13—C14—C15 | -8.9 (7)    |
| C20—C6—C7—C8  | 177.7 (4)  | N3—C13—C14—C19  | -9.1 (7)    |
| C6—C7—C8—C9   | 0.9 (7)    | C12—C13—C14—C19 | 172.8 (5)   |
| C7—C8—C9—C4   | 2.6 (6)    | C19—C14—C15—C16 | 1.2 (9)     |
| C7—C8—C9—C10  | -177.4 (4) | C13—C14—C15—C16 | -177.2 (5)  |
| C5—C4—C9—C8   | -4.2 (6)   | C14—C15—C16—C17 | -0.3 (10)   |
| C3—C4—C9—C8   | 174.2 (4)  | C15—C16—C17—C18 | -0.9 (9)    |
| C5—C4—C9—C10  | 175.8 (4)  | C15—C16—C17—Br1 | 177.7 (5)   |
| C3—C4—C9—C10  | -5.8 (6)   | C16—C17—C18—C19 | 1.1 (8)     |
| C8—C9—C10—C11 | 57.0 (5)   | Br1—C17—C18—C19 | -177.4 (4)  |
| C4—C9—C10—C11 | -123.0 (4) | C17—C18—C19—C14 | -0.2 (8)    |
| C8—C9—C10—C21 | -62.7 (5)  | C15—C14—C19—C18 | -1.0 (8)    |
| C4—C9—C10—C21 | 117.3 (4)  | C13—C14—C19—C18 | 177.3 (4)   |
| C8—C9—C10—C1  | 176.2 (4)  | C9—C10—C21—O1   | -176.8 (4)  |
| C4—C9—C10—C1  | -3.7 (6)   | C11—C10—C21—O1  | 67.1 (5)    |
| C2—C1—C10—C9  | 38.0 (5)   | C1—C10—C21—O1   | -54.0 (5)   |
| C2—C1—C10—C11 | 155.8 (4)  | C1S—C2S—O1S—C3S | -177.7 (14) |
| C2—C1—C10—C21 | -81.4 (4)  | C2S—O1S—C3S—C4S | 175.5 (14)  |
| N2—N1—C11—C10 | -81.1 (5)  |                 |             |

**Table S11. Hydrogen-bond parameters**

| $D-H\cdots A$       | $D-H$ (Å) | $H\cdots A$ (Å) | $D\cdots A$ (Å) | $D-H\cdots A$ (°) |
|---------------------|-----------|-----------------|-----------------|-------------------|
| $O1-H1\cdots Cl1^i$ | 0.93 (5)  | 2.22 (5)        | 3.126 (4)       | 166 (5)           |
| $N3-H3\cdots Cl1$   | 0.82 (6)  | 2.18 (6)        | 3.003 (4)       | 174 (6)           |

Symmetry code(s): (i)  $-x-3/2, y-1/2, -z-1$ .

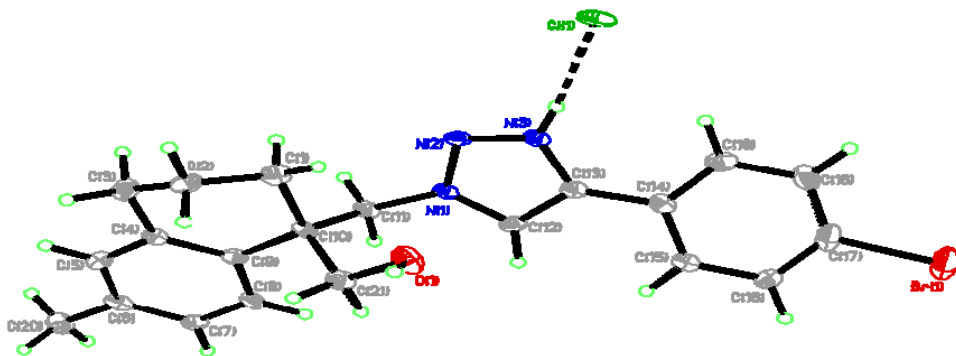

**Figure S22.** Perspective views showing 50% probability displacement

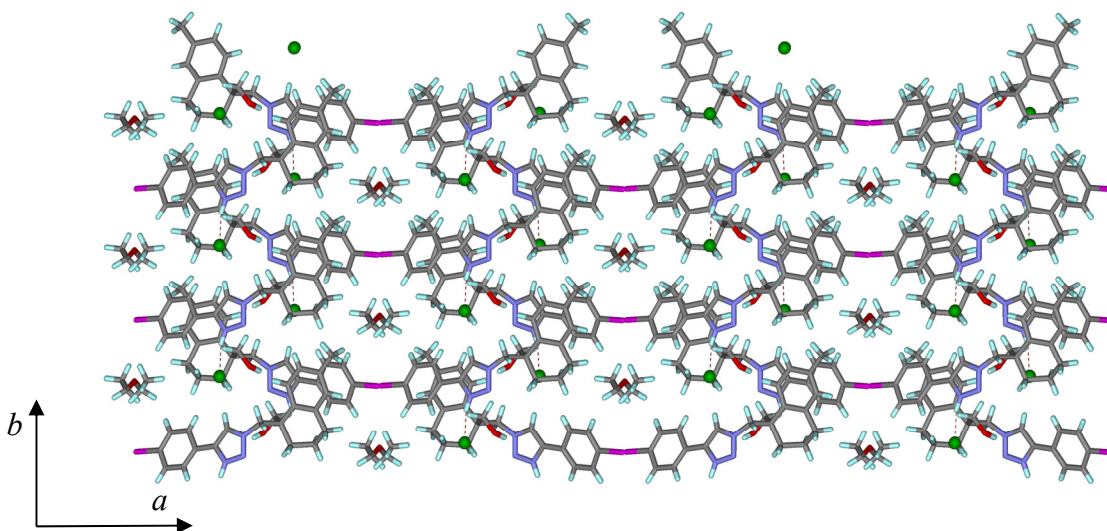

**Figure S23.** Three-dimensional supramolecular architecture viewed along the  $c$ -axis direction

# <sup>1</sup>H NMR Spectra of Known Compounds

1H, 599.79 MHz, cdCl<sub>3</sub>

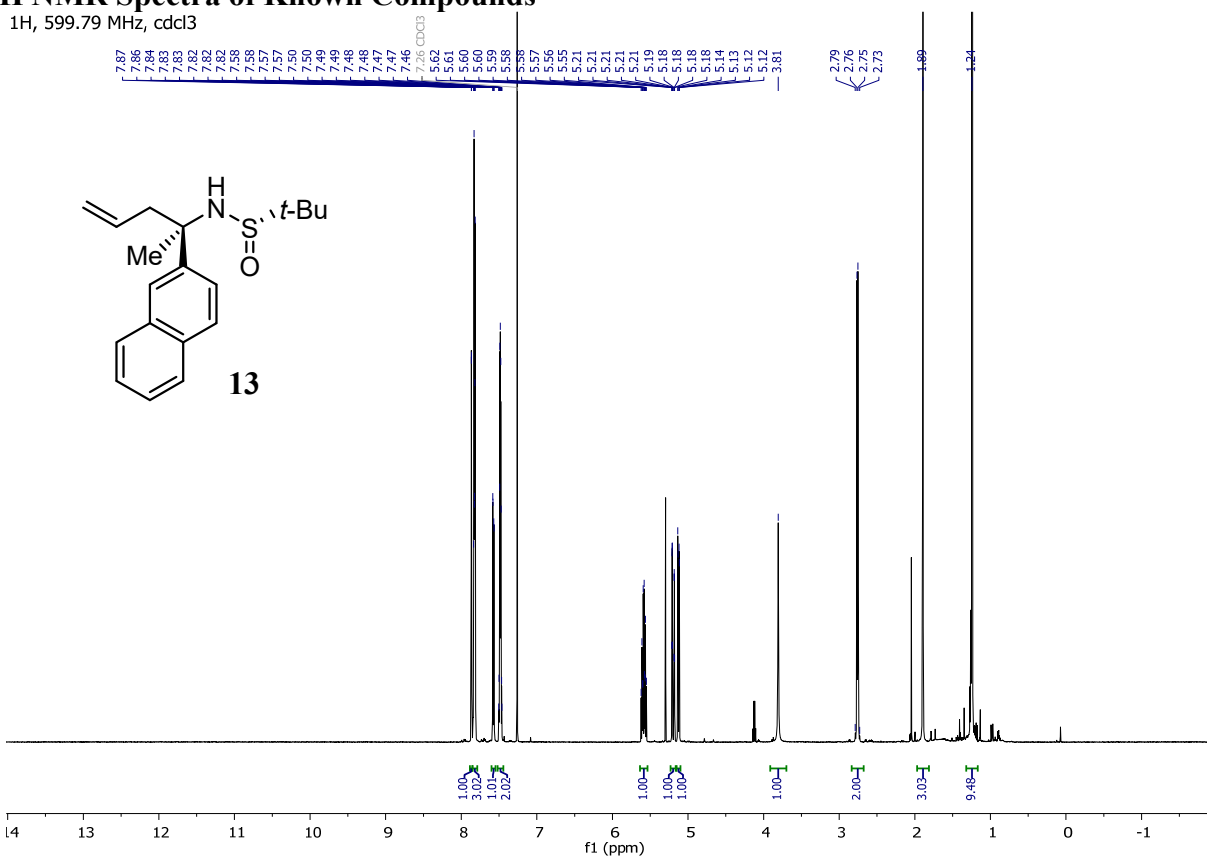

1H, 599.79 MHz, cdCl<sub>3</sub>

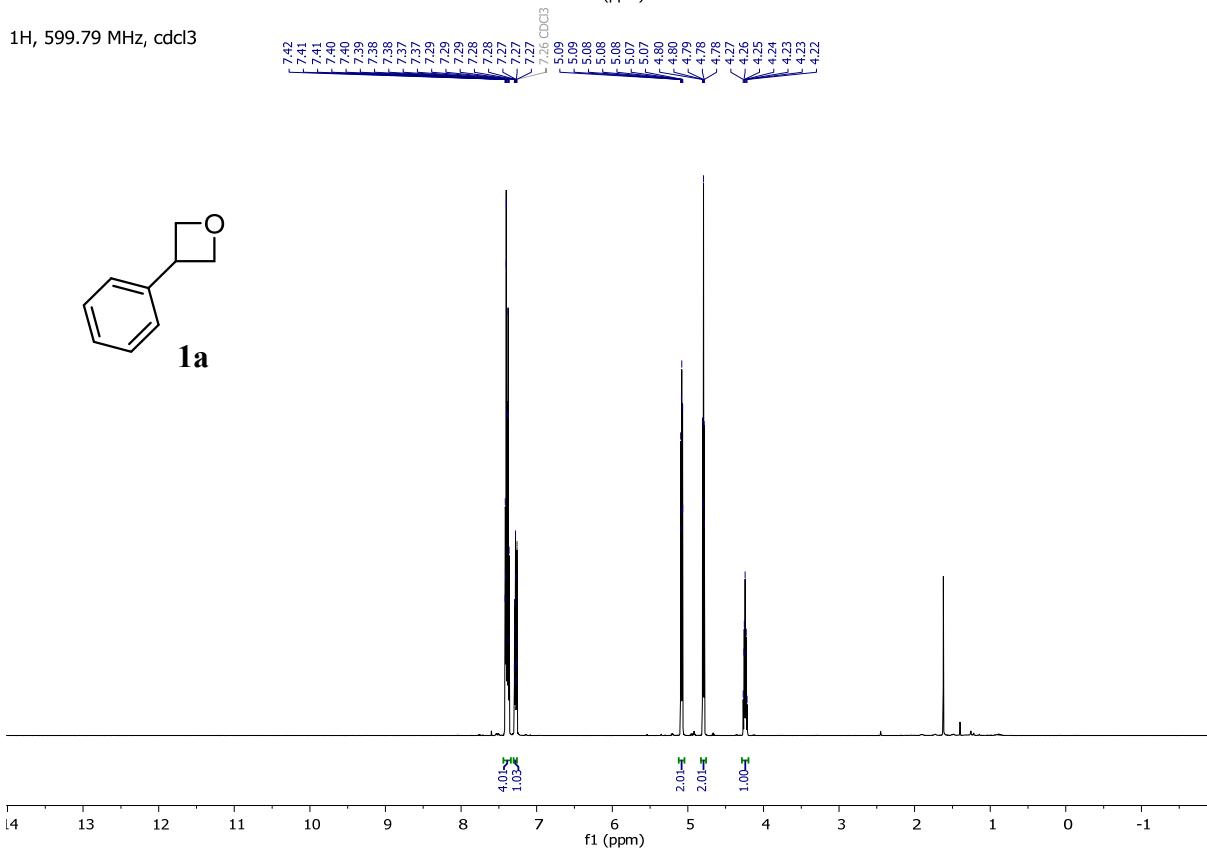

1H, 599.79 MHz, cdcl3

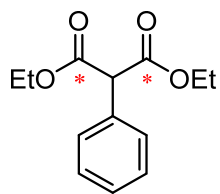

16

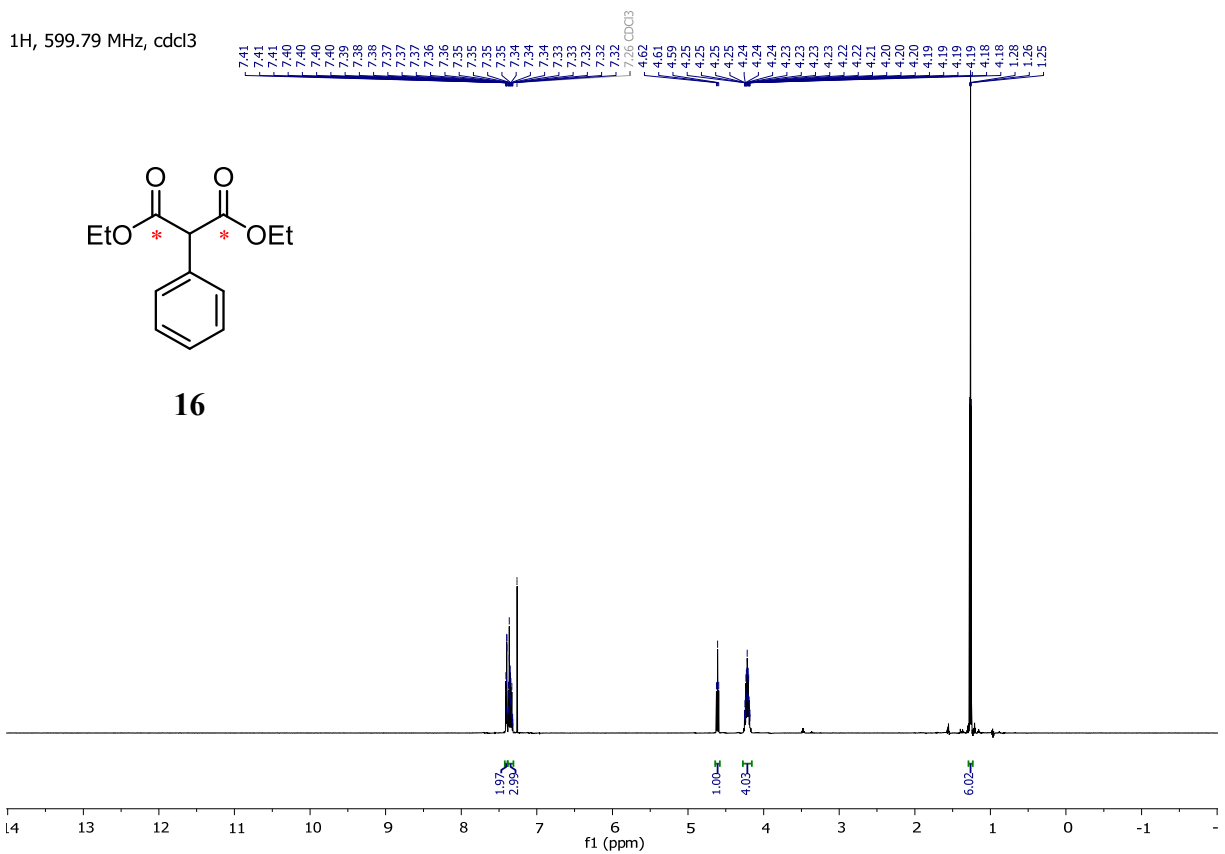

1H, 599.79 MHz, cdcl3

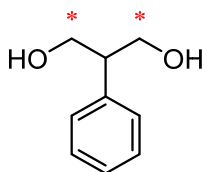

17

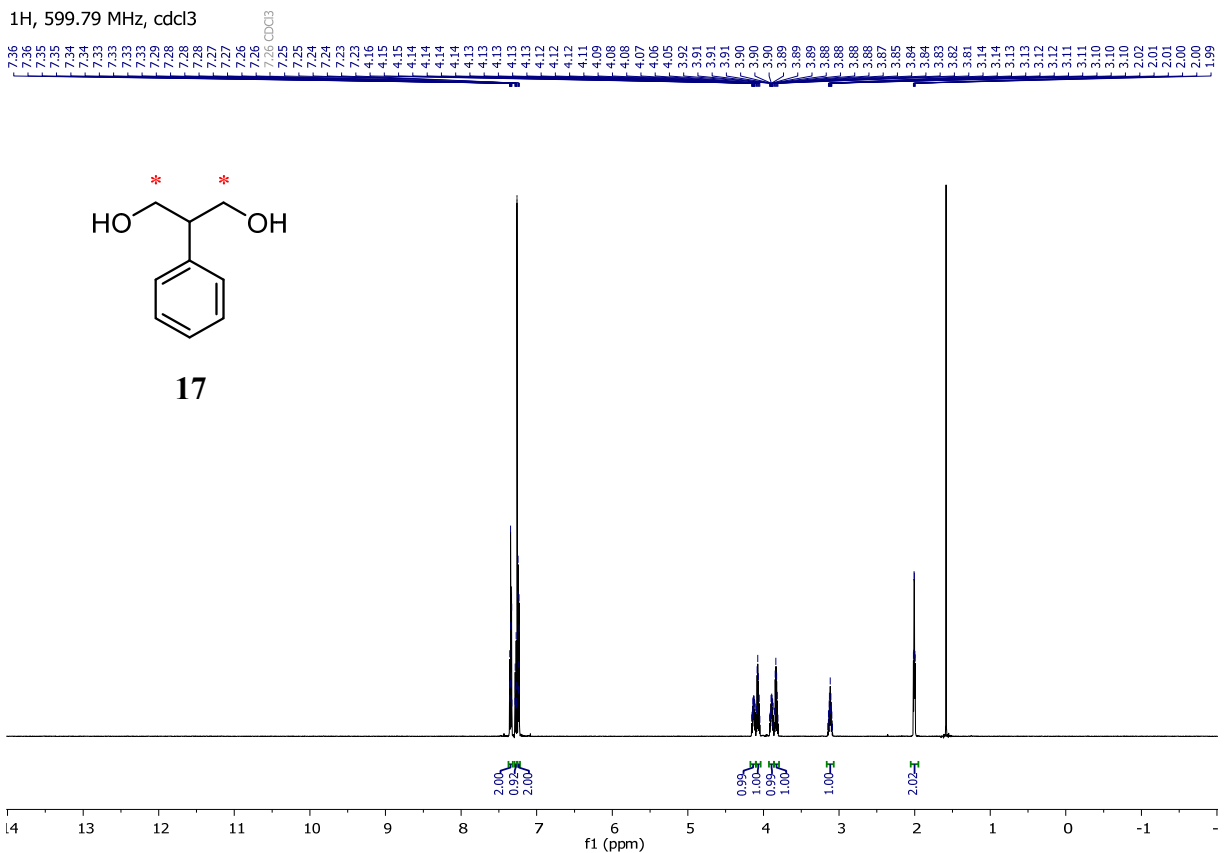

1H, 500.18 MHz, cdcl3

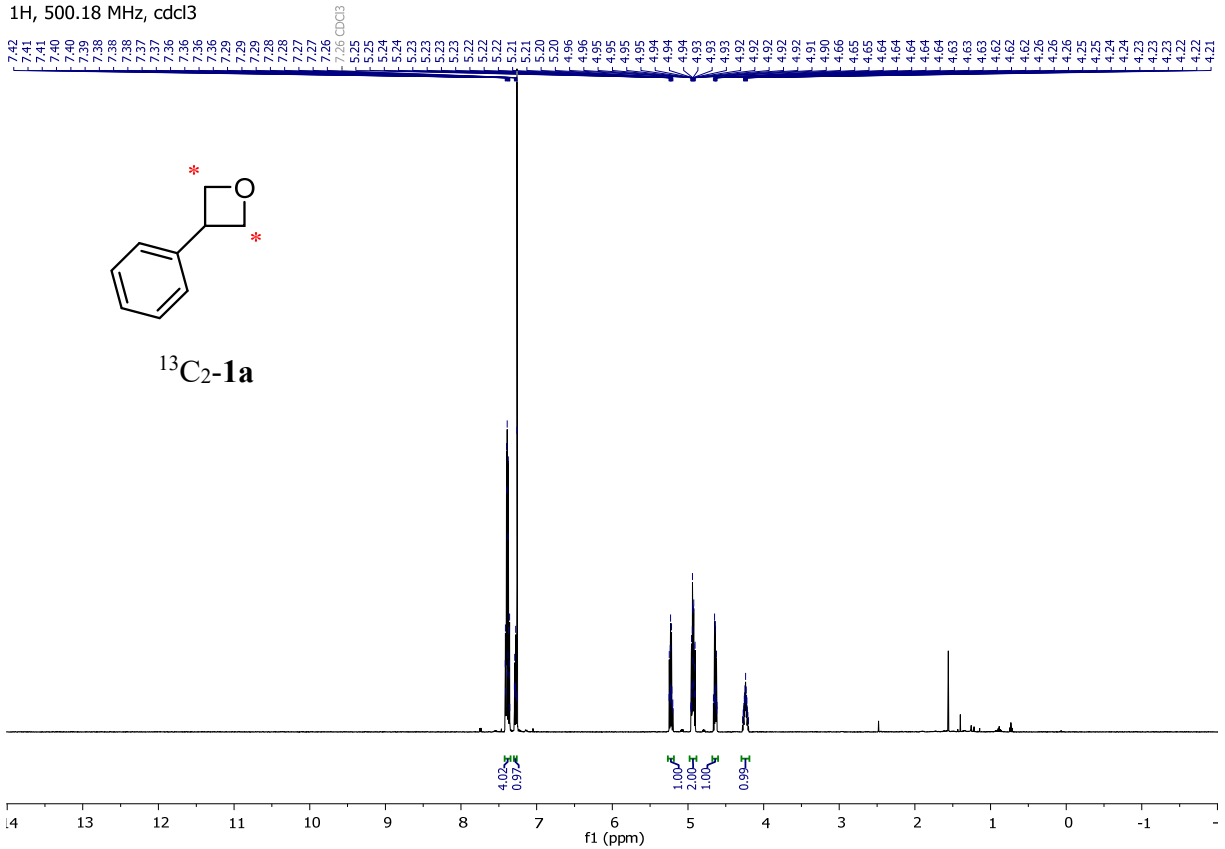

1H, 599.79 MHz, cdcl3

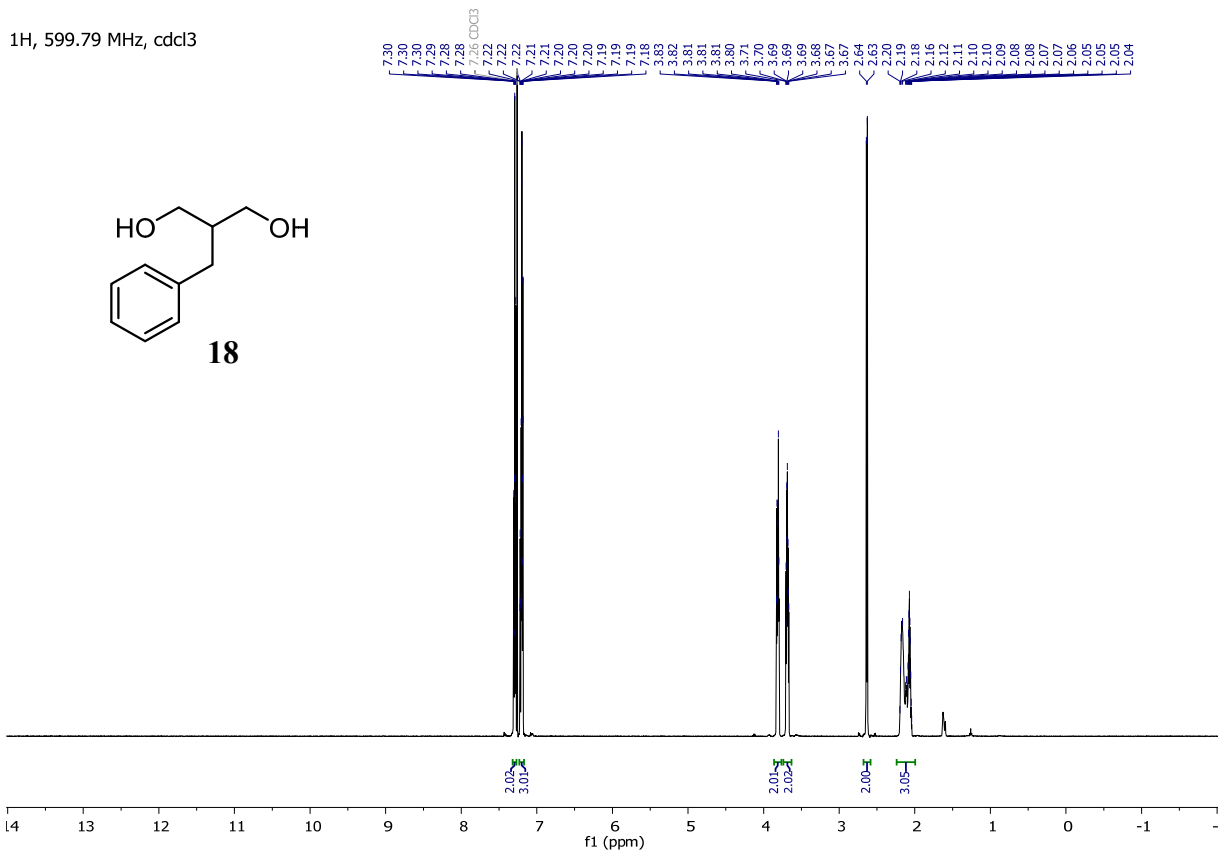

1H, 599.79 MHz, cdcl3

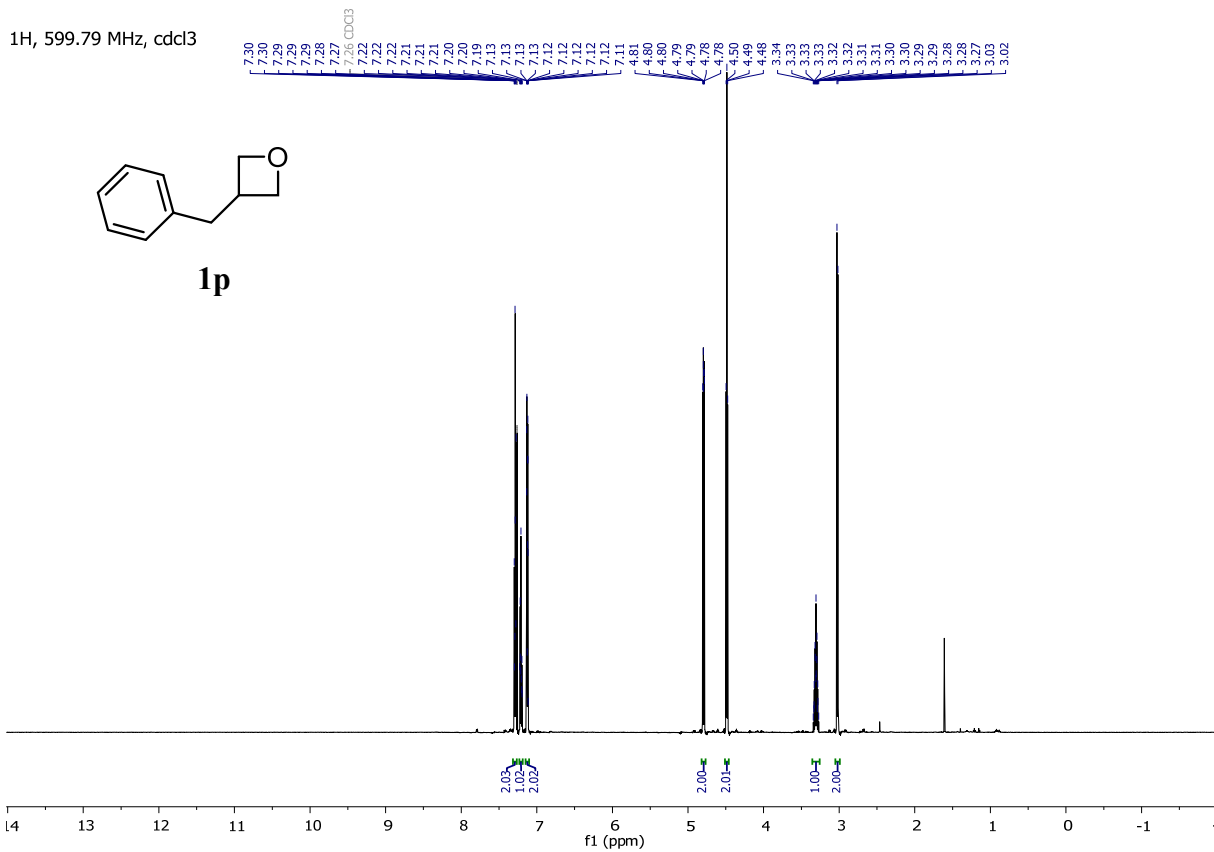

1H, 399.78 MHz, cdcl3

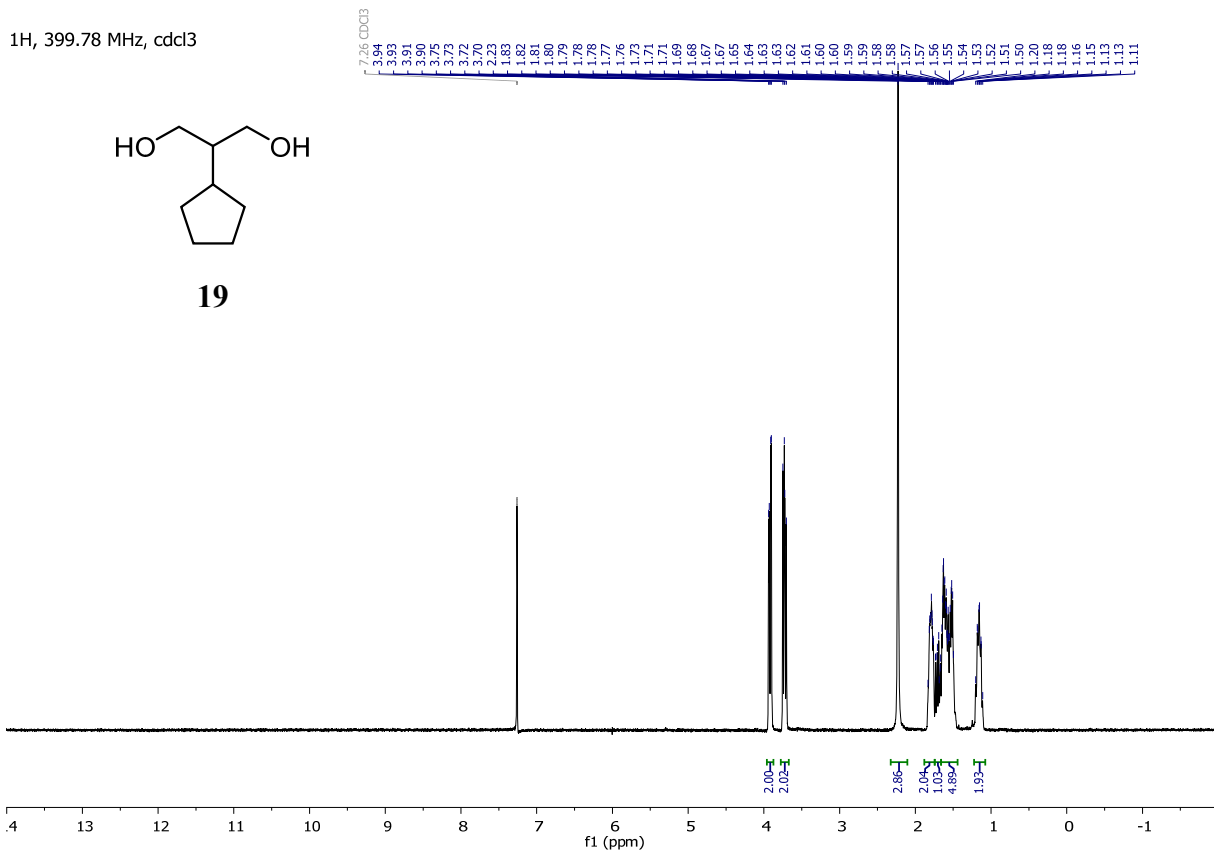

<sup>1</sup>H, 500.18 MHz, cdcl<sub>3</sub>

7.26 CDCl<sub>3</sub>  
4.20  
4.20  
4.20  
4.19  
4.17  
4.17  
4.16  
3.14  
3.12  
2.12  
2.12  
2.11  
2.11  
2.10  
2.09  
2.08  
2.08  
2.07  
2.06  
2.06  
2.05  
2.05  
1.73  
1.73  
1.72  
1.72  
1.71  
1.70  
1.70  
1.70  
1.69  
1.69  
1.66  
1.66  
1.65  
1.65  
1.64  
1.64  
1.63  
1.63  
1.33  
1.33  
1.31  
1.31  
1.30  
1.29  
1.28  
1.28  
1.27  
1.26  
1.26  
1.25  
1.19  
1.18  
1.18  
1.16  
1.16  
1.15  
1.14  
1.14  
1.14  
1.13  
1.13  
1.13  
1.07  
1.07  
1.06  
1.05  
1.04  
1.02  
1.01

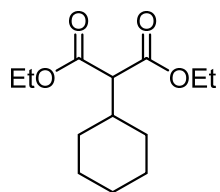

20

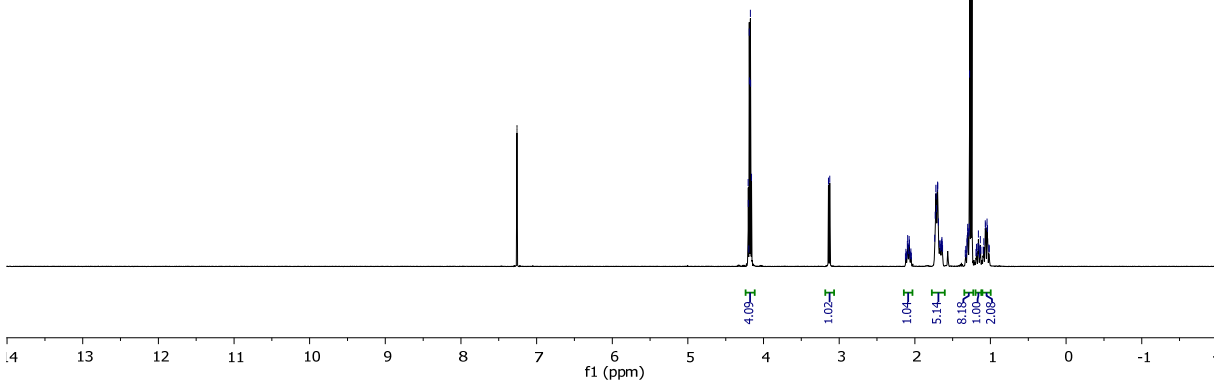

<sup>1</sup>H, 599.79 MHz, cdcl<sub>3</sub>

7.26 CDCl<sub>3</sub>  
3.89  
3.88  
3.87  
3.87  
3.86  
3.86  
3.83  
3.83  
3.82  
3.81  
3.81  
3.80  
2.18  
2.17  
2.16  
1.75  
1.74  
1.74  
1.73  
1.73  
1.73  
1.72  
1.71  
1.71  
1.71  
1.67  
1.67  
1.67  
1.66  
1.66  
1.65  
1.65  
1.65  
1.64  
1.64  
1.64  
1.59  
1.58  
1.58  
1.57  
1.57  
1.56  
1.56  
1.53  
1.53  
1.43  
1.43  
1.42  
1.41  
1.41  
1.40  
1.40  
1.38  
1.38  
1.24  
1.24  
1.23  
1.22  
1.22  
1.21  
1.20  
1.17  
1.17  
1.16  
1.15  
1.14  
1.14  
1.14  
1.13  
1.13  
1.12  
1.11  
1.11  
1.04  
1.03  
1.02  
1.01  
1.00  
0.99  
0.98

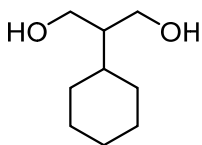

21

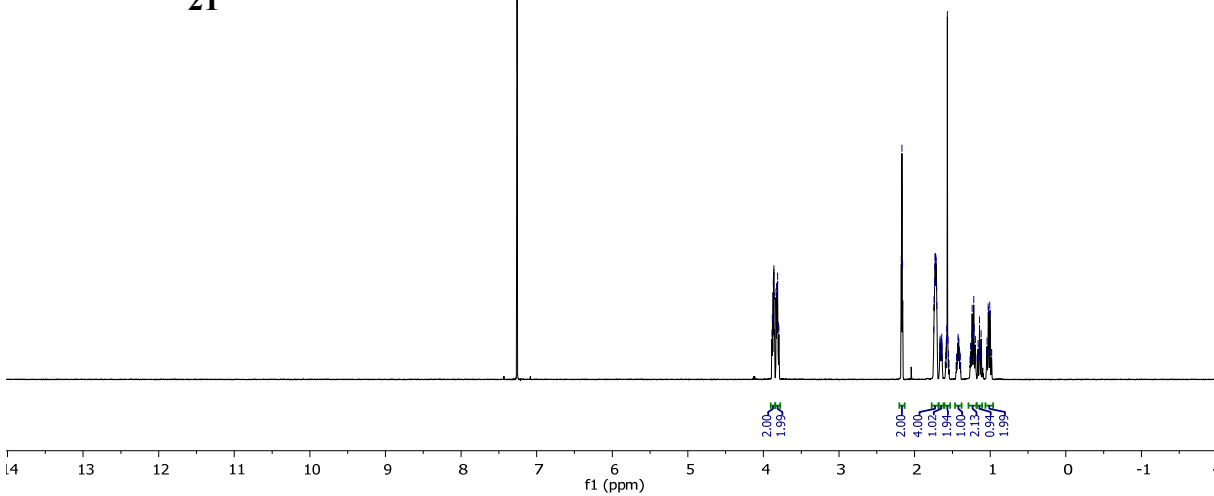

<sup>1</sup>H, 599.79 MHz, cdcl<sub>3</sub>

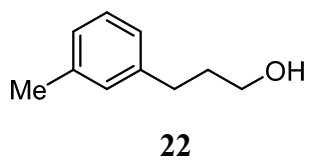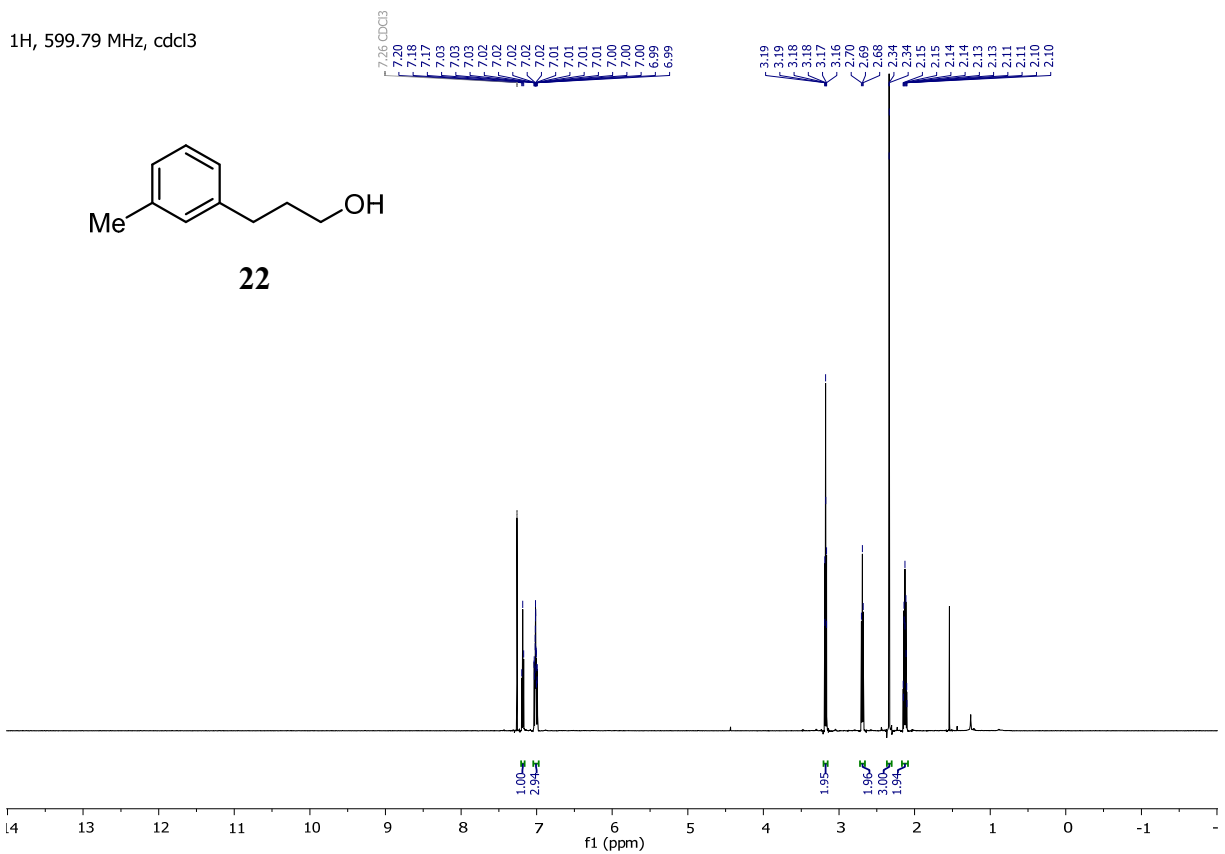

<sup>1</sup>H, 599.79 MHz, cdcl<sub>3</sub>

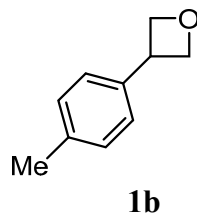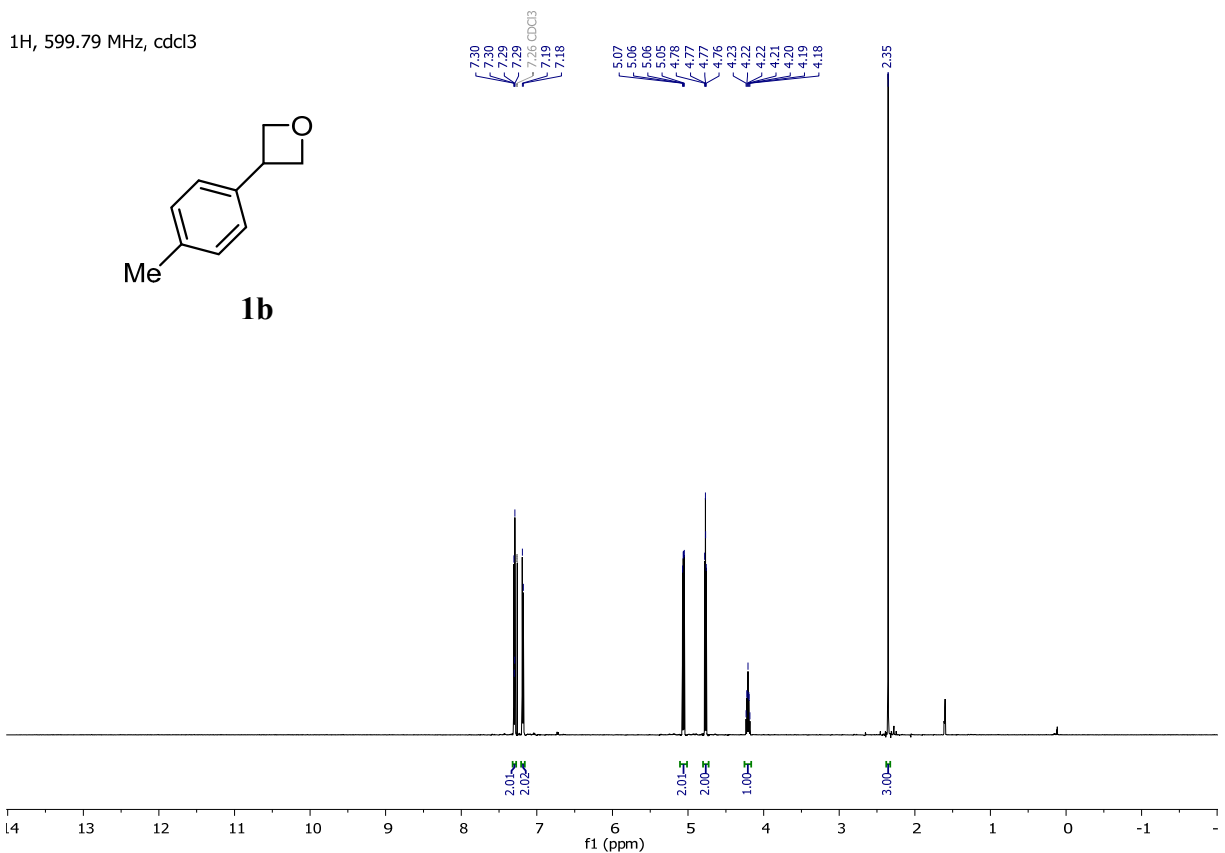



1H, 599.79 MHz, cdcl3

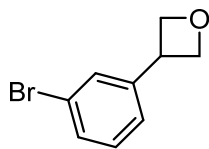

**1e**

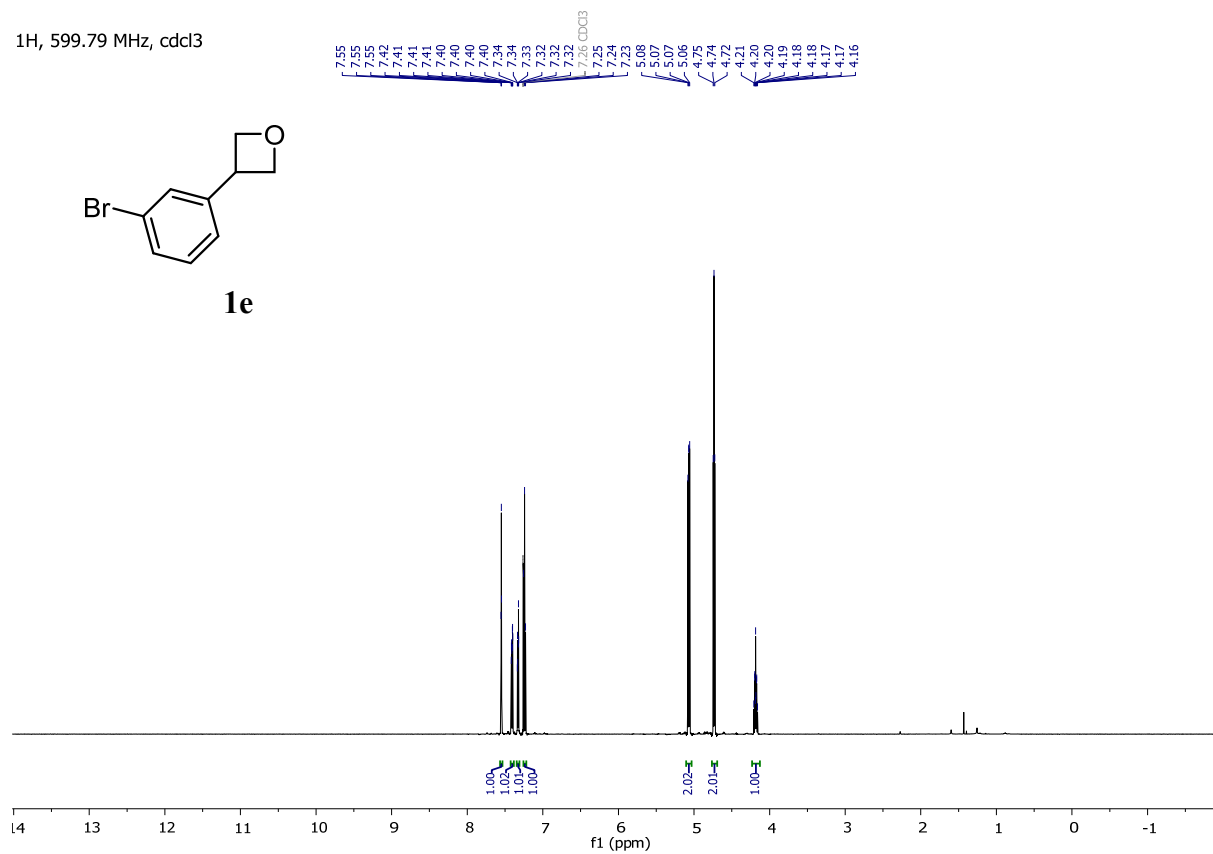

1H, 500.18 MHz, cdcl3

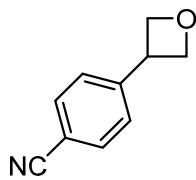

**1f**

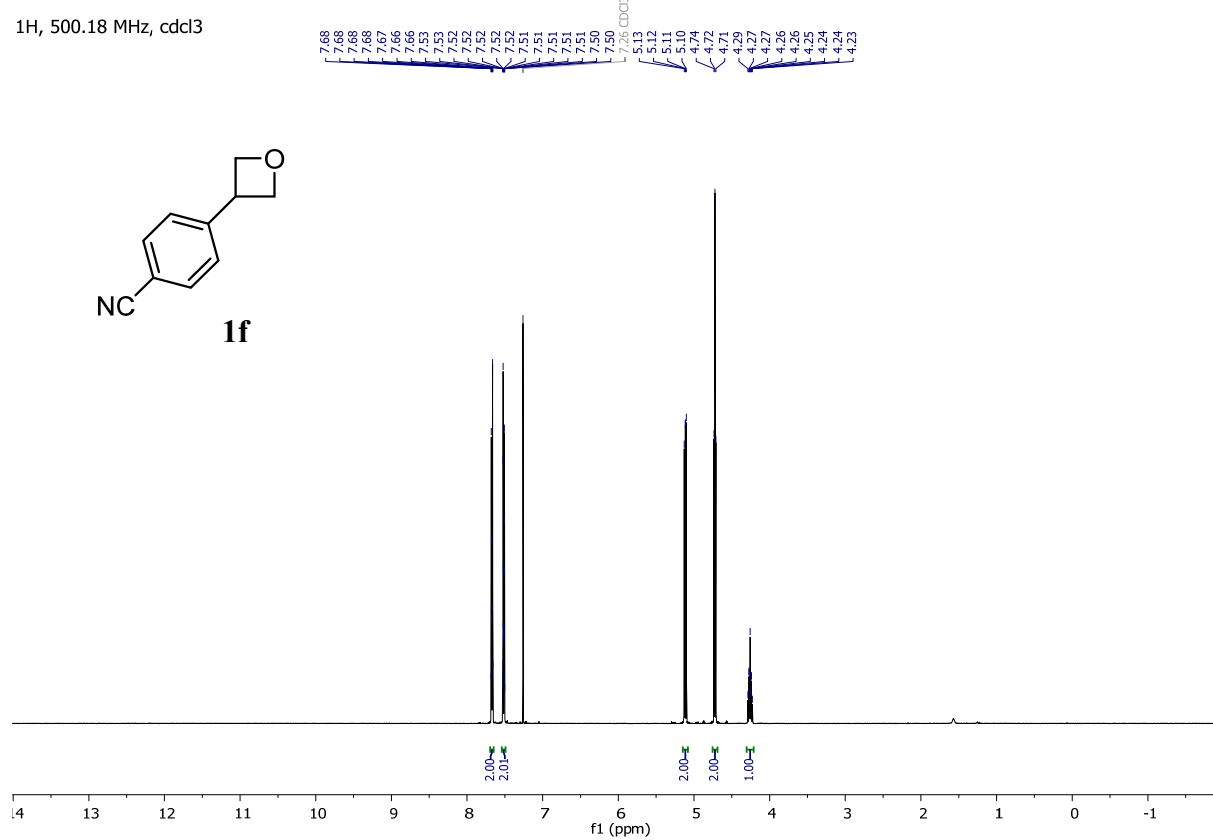

1H, 599.79 MHz, cdcl3

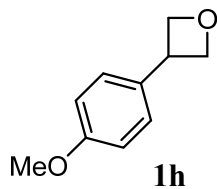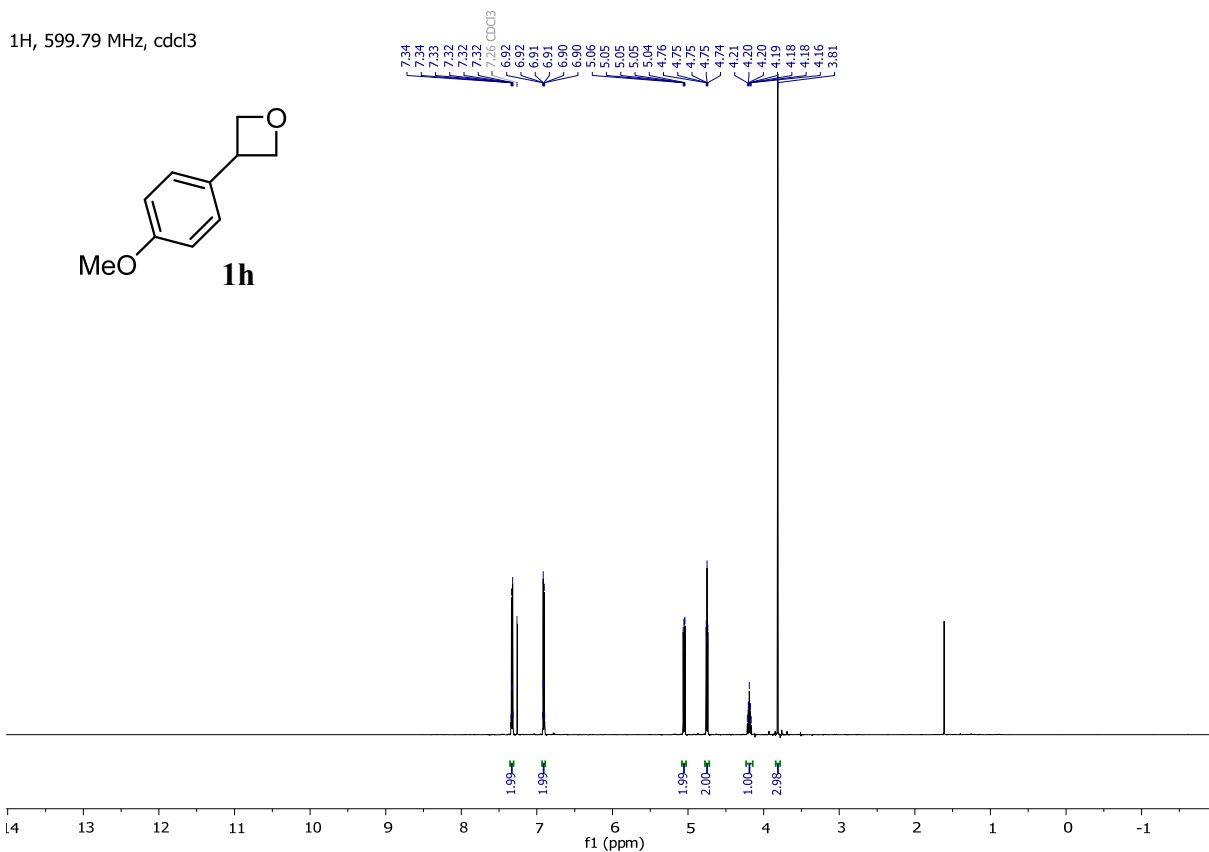

1H, 599.79 MHz, cdcl3

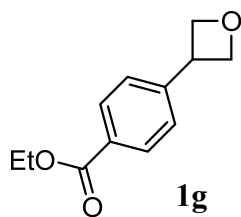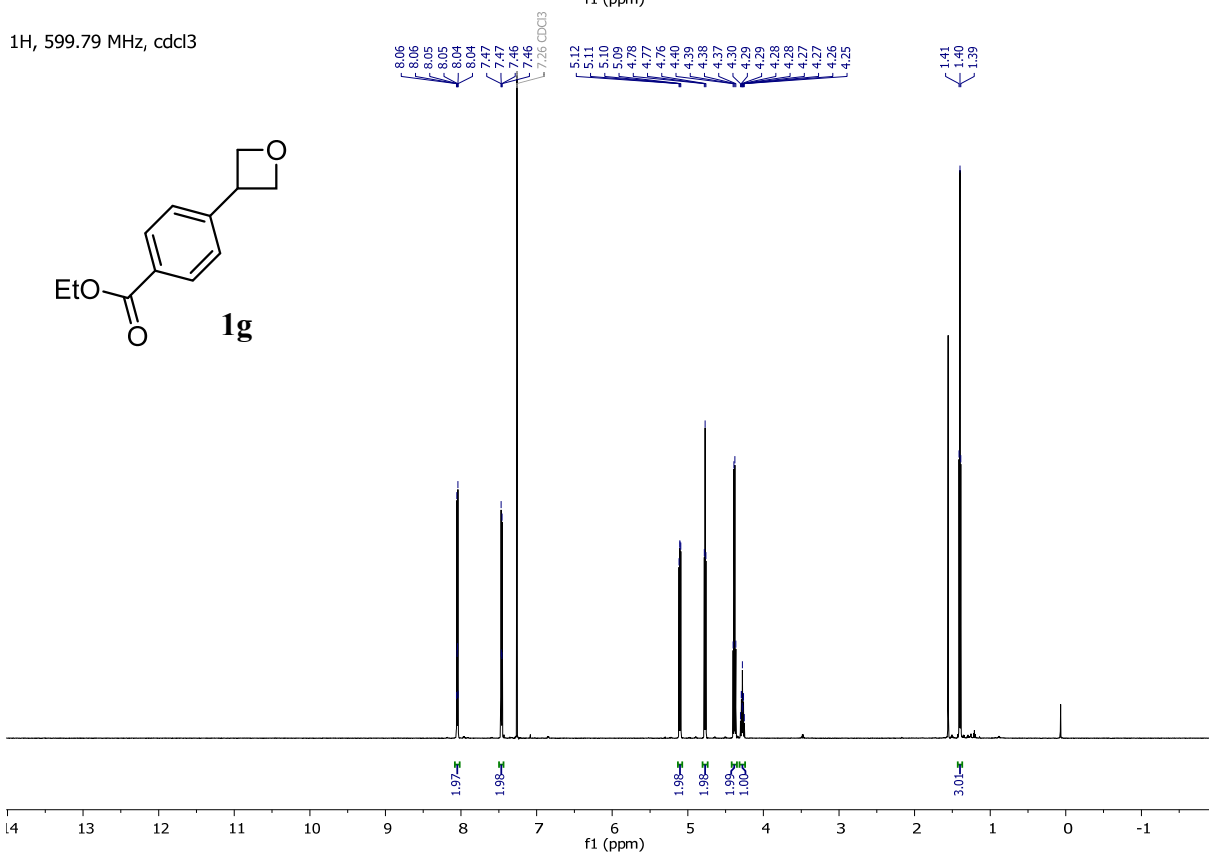

1H, 599.79 MHz, cdcl3

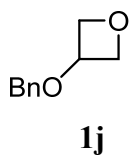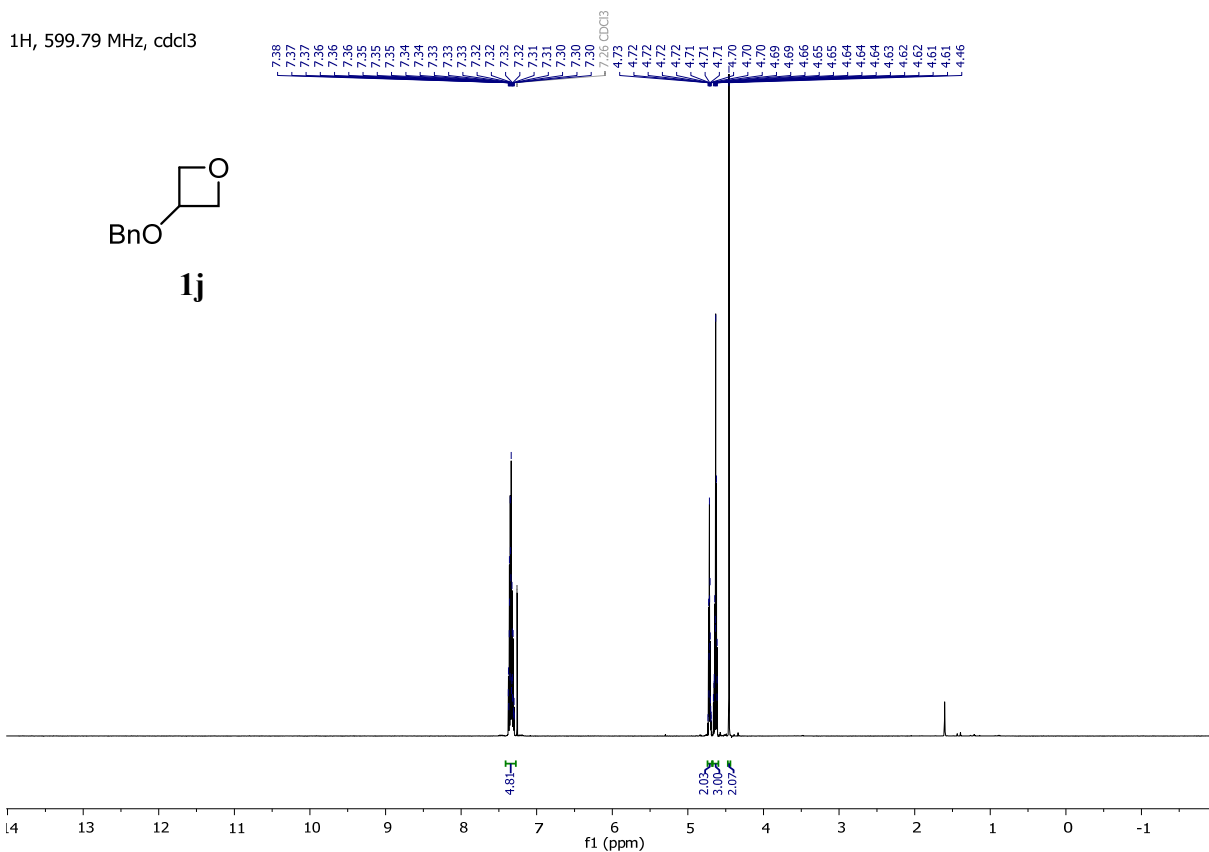

1H, 599.79 MHz, cdcl3

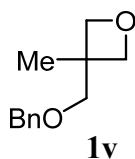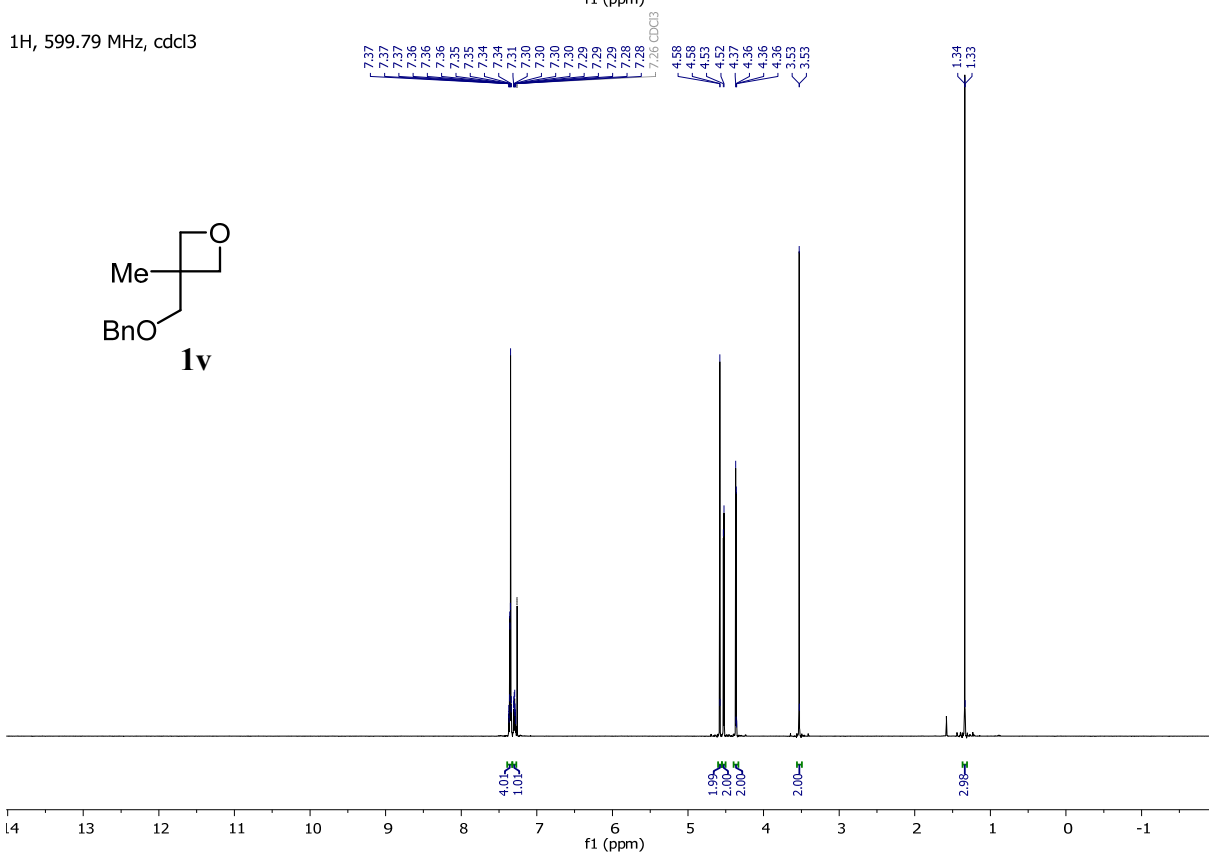

1H, 599.79 MHz, cdcl3

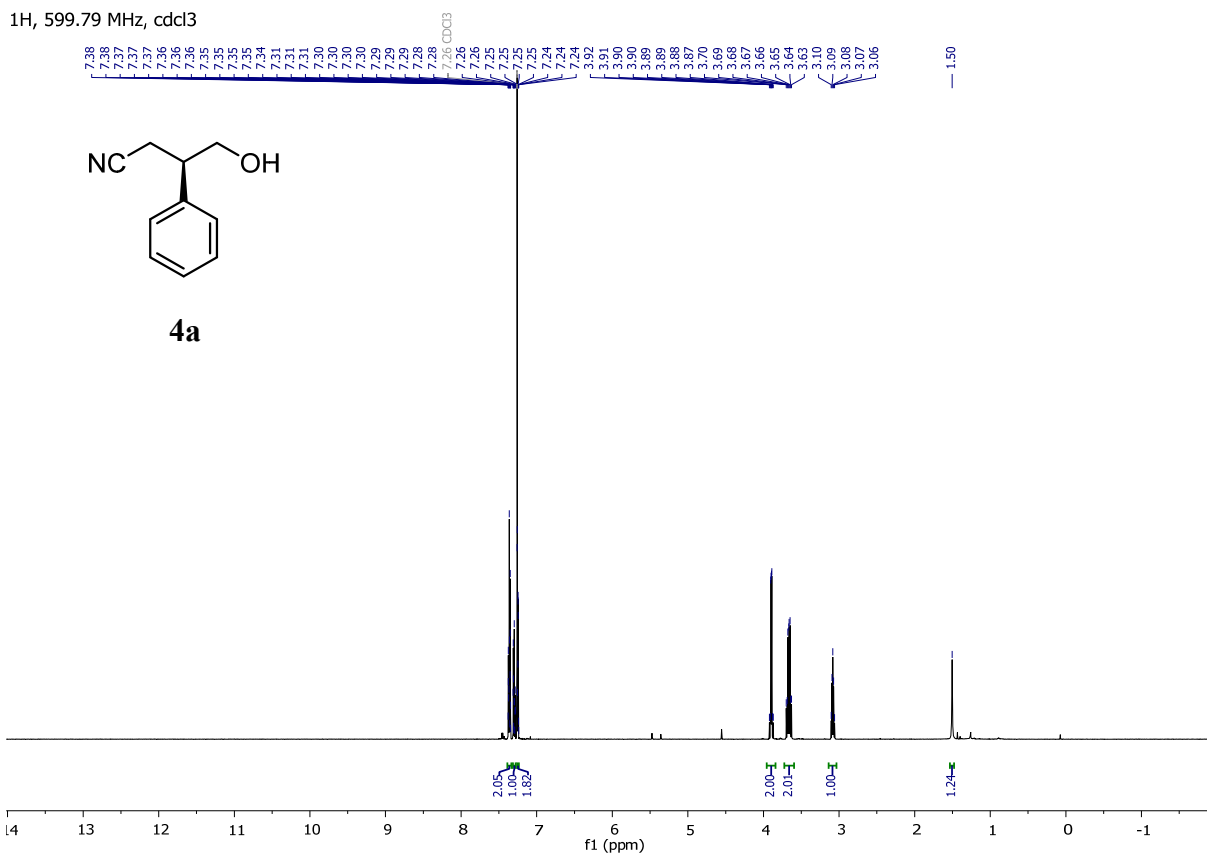

1H, 599.79 MHz, cdcl3

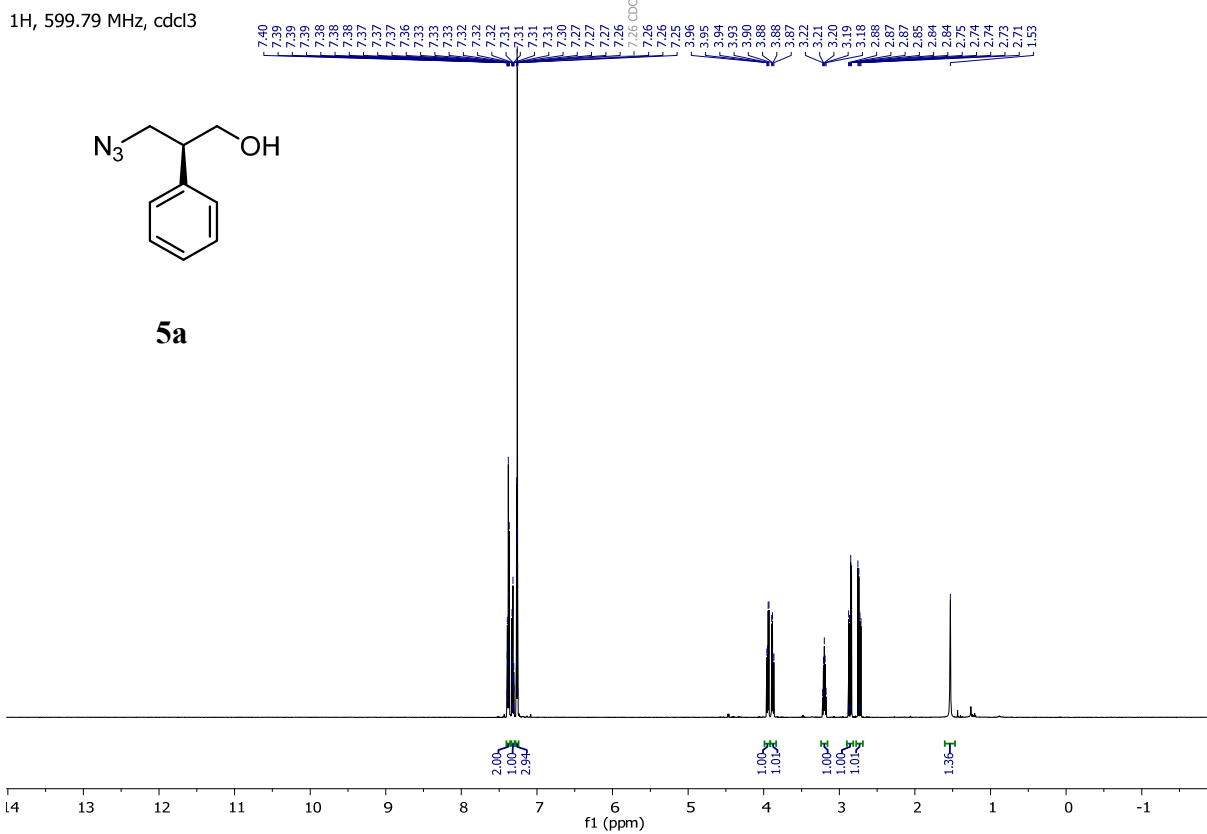

1H, 599.79 MHz, cdcl3

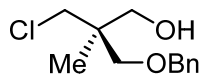

28

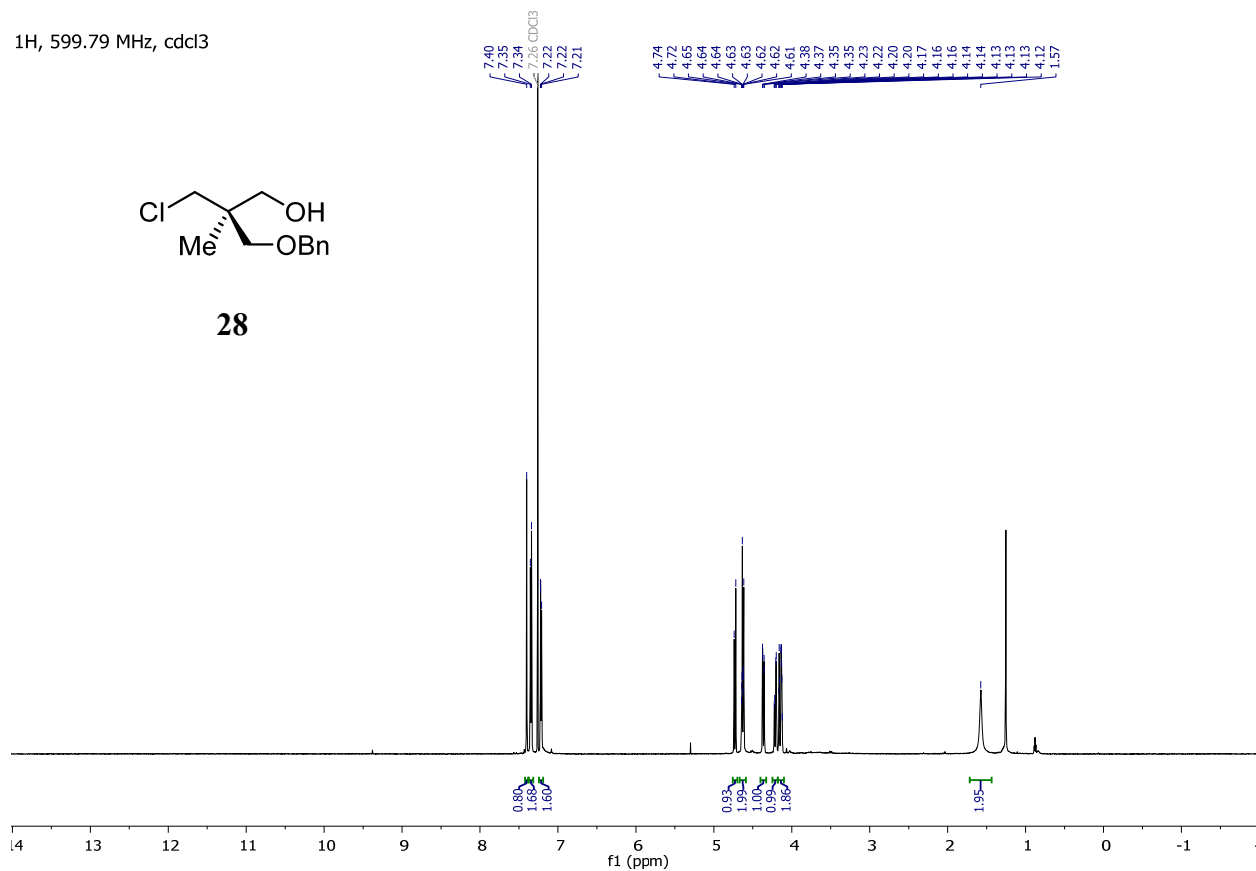

1H, 599.79 MHz, cdcl3

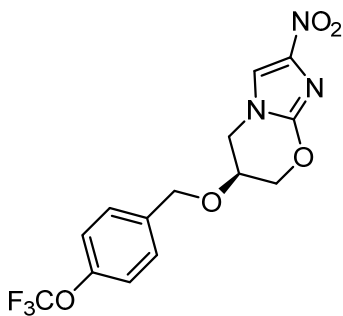

Pretomanid (10)

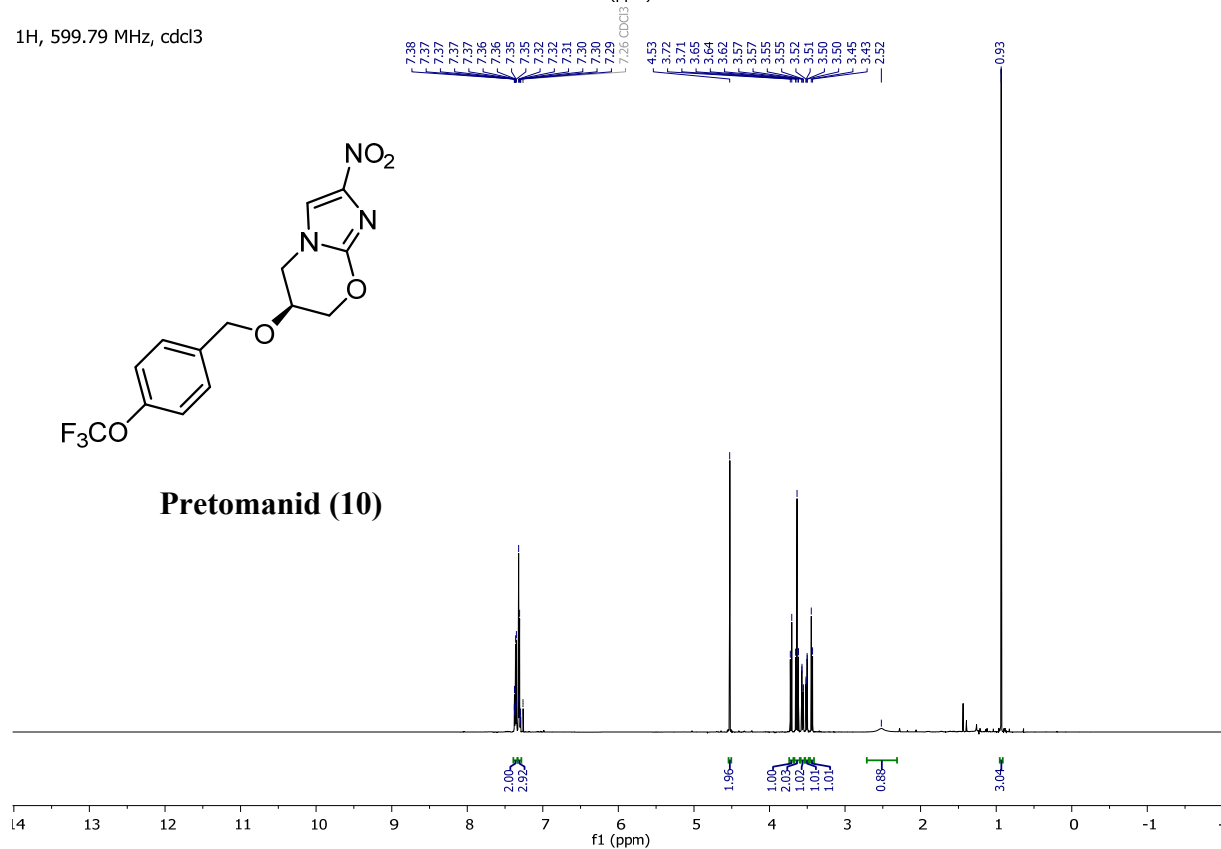

1H, 500.18 MHz, cdcl3

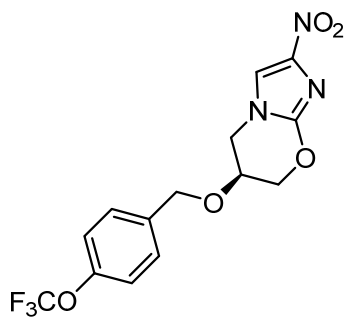

**Pretomanid – authentic  
sample from MilliporeSigma**

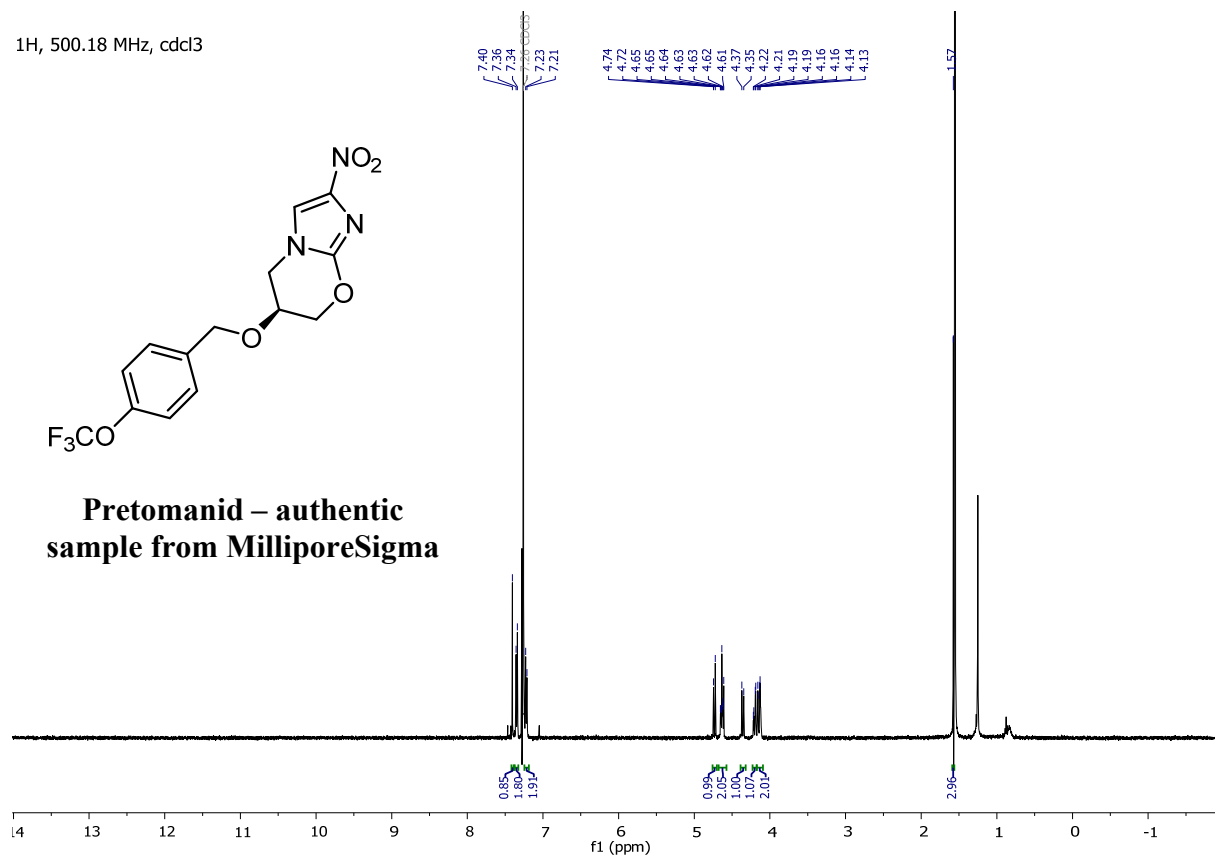

# NMR Spectra of Novel Compounds

<sup>1</sup>H, 500.18 MHz, cdCl<sub>3</sub>

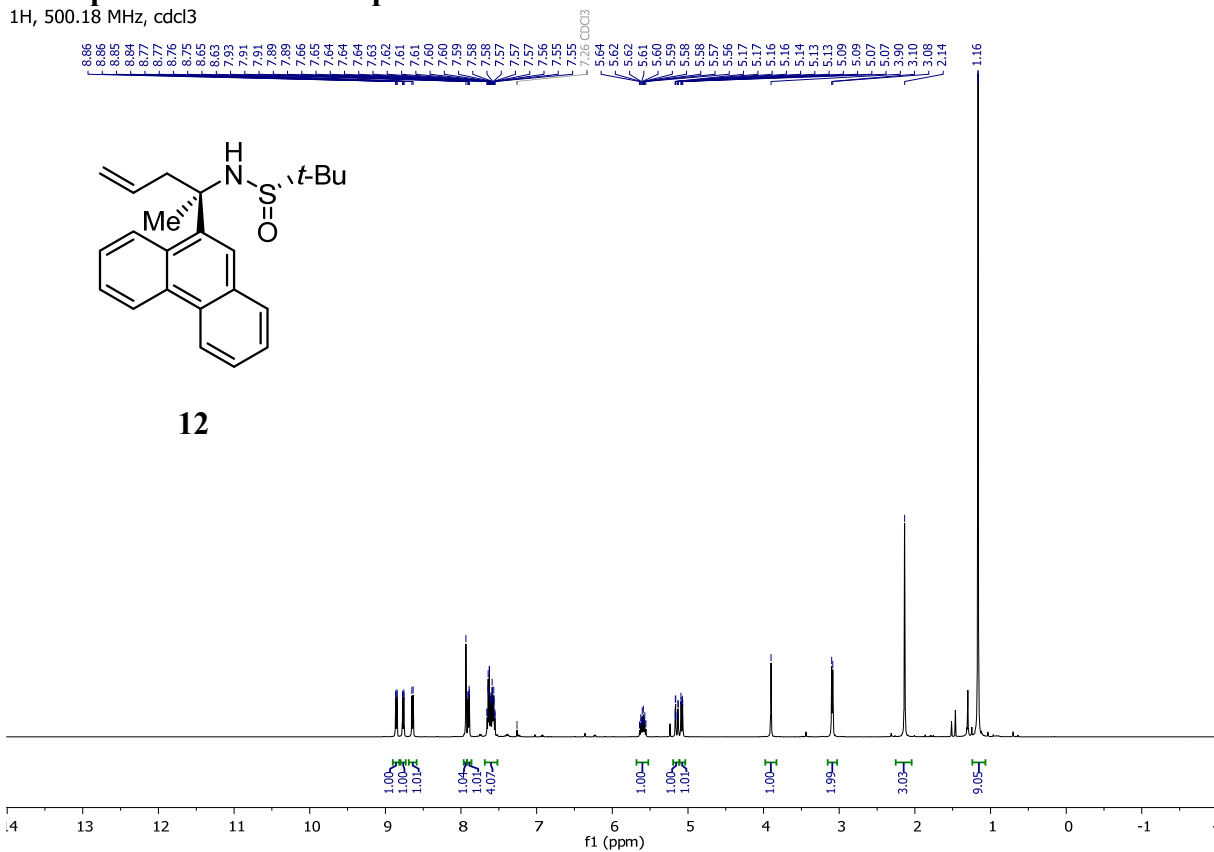

12

<sup>13</sup>C, 125.78 MHz, cdCl<sub>3</sub>

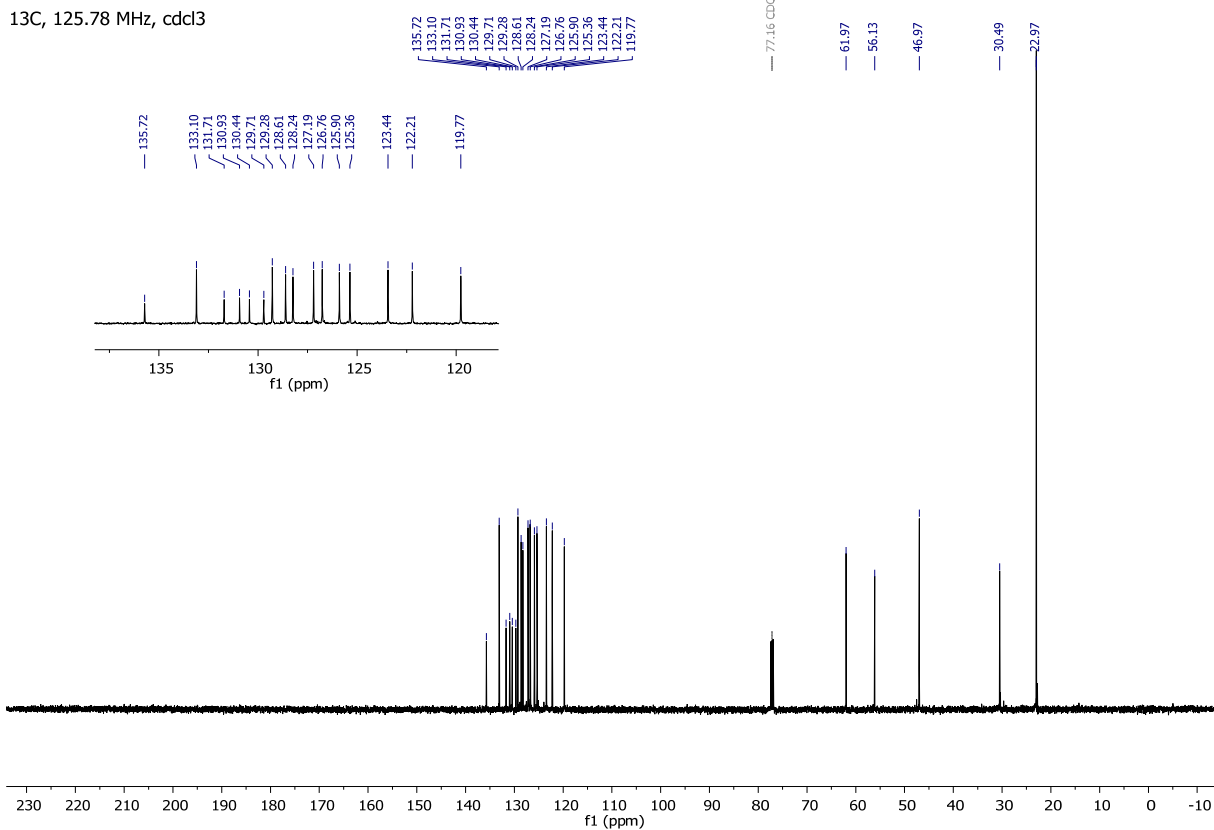

<sup>1</sup>H, 599.79 MHz, cdCl<sub>3</sub>

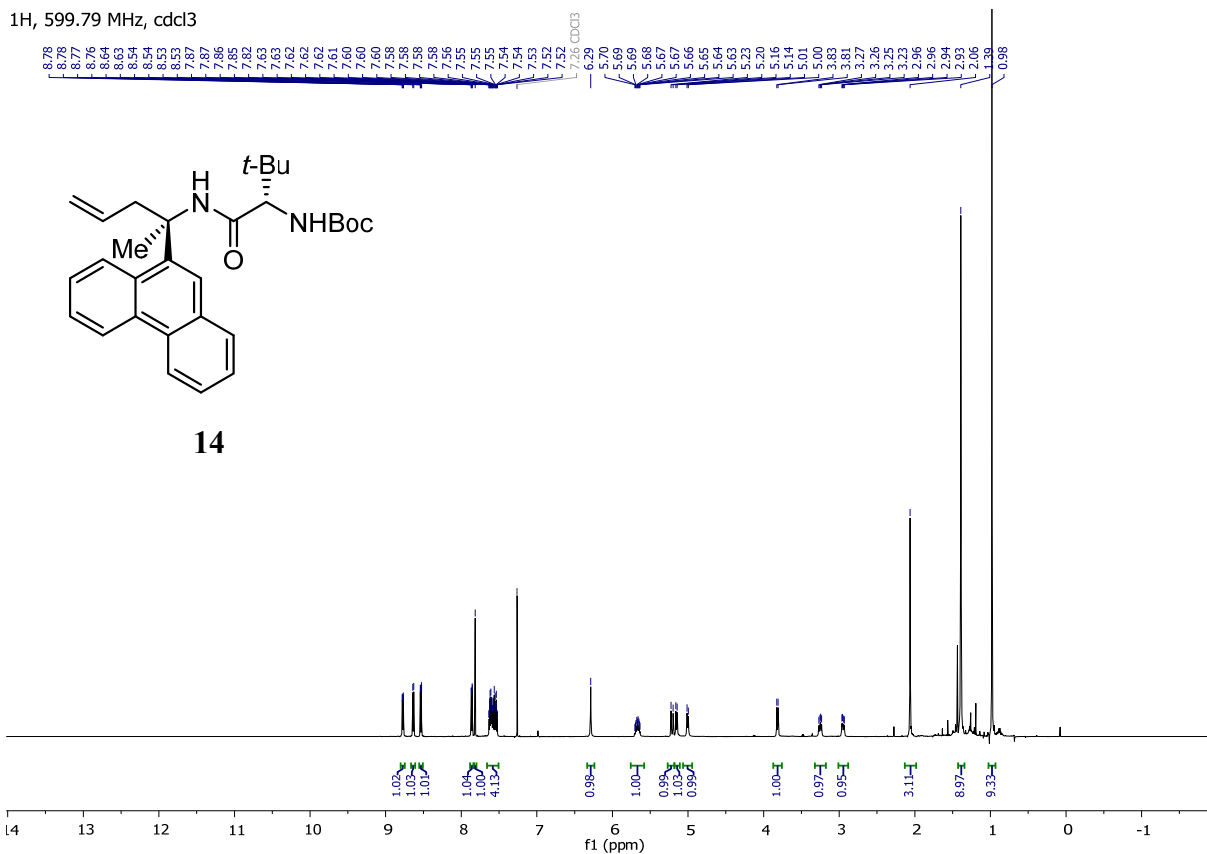

<sup>13</sup>C, 125.71 MHz, cdCl<sub>3</sub>

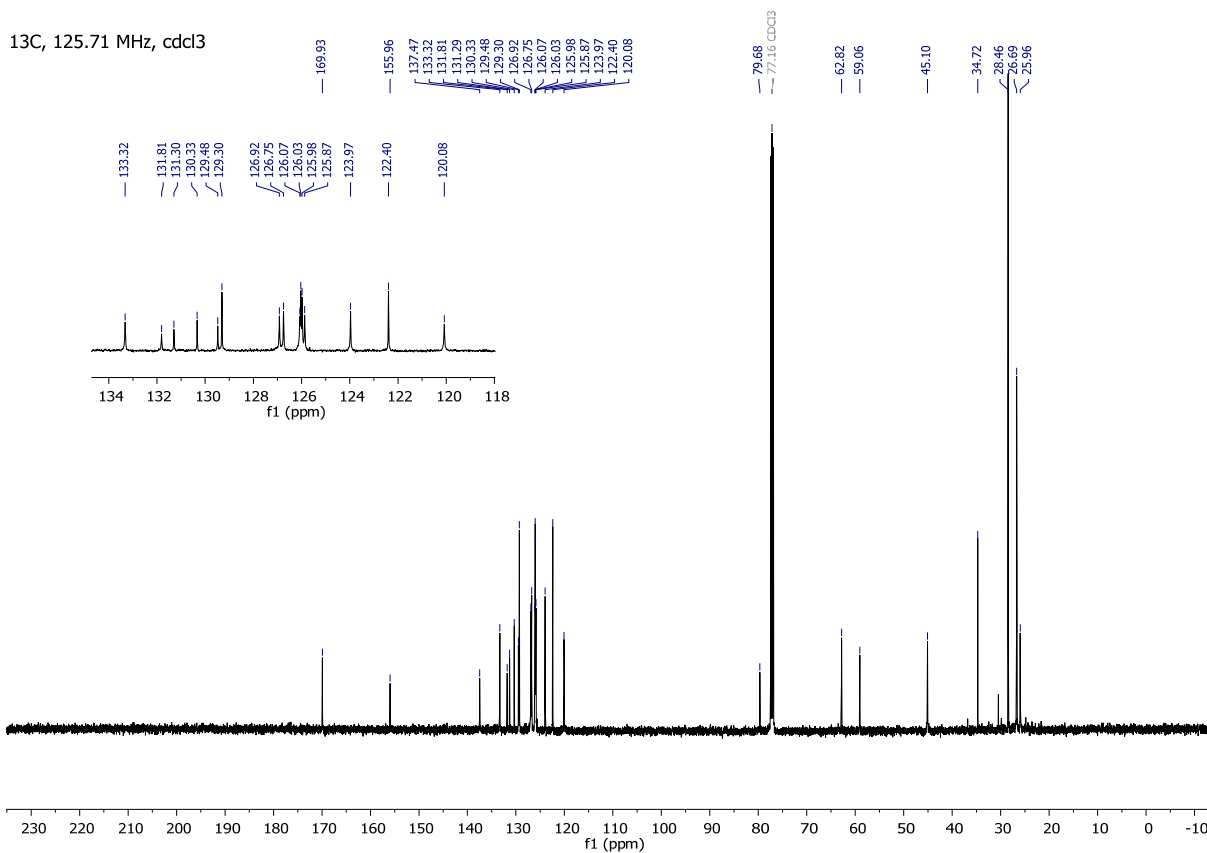





1H, 500.18 MHz, dms0

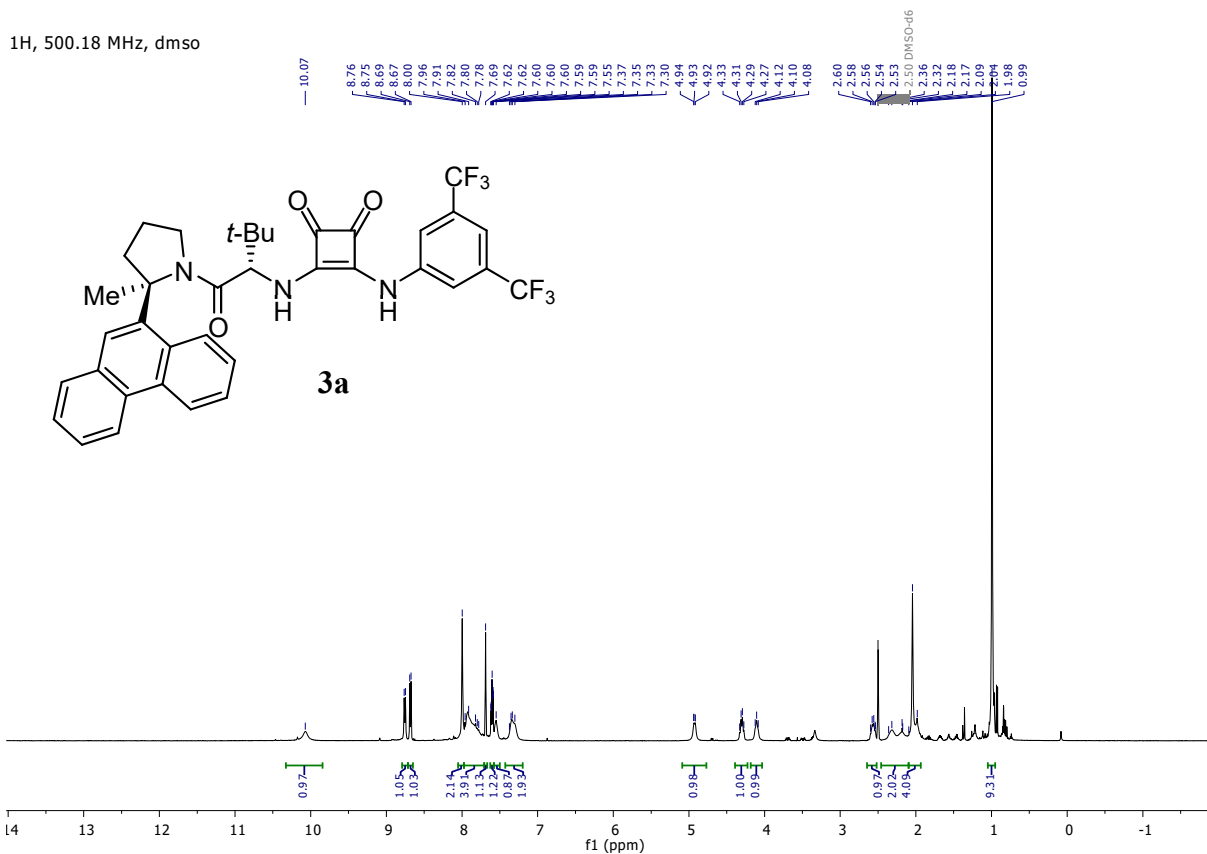

13C, 125.71 MHz, dms0

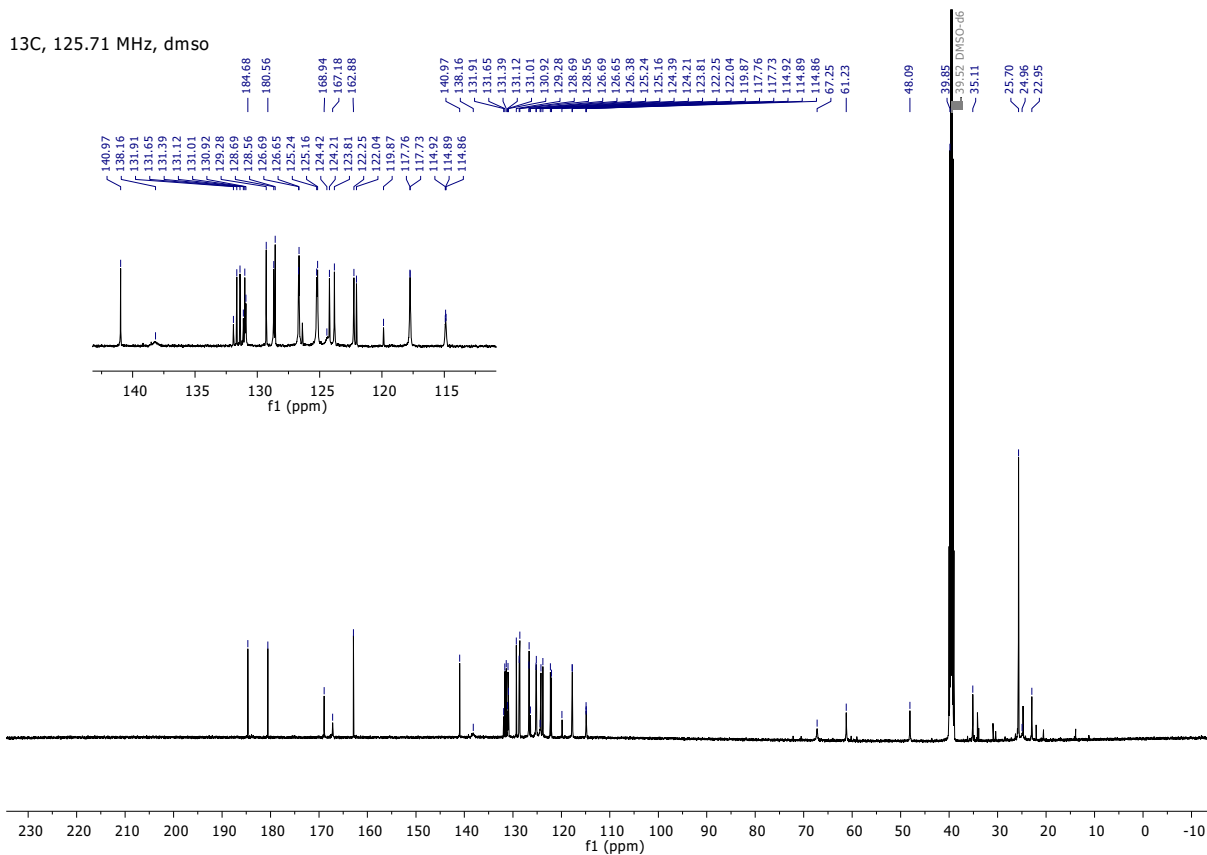

19F, 375.77 MHz, dmso

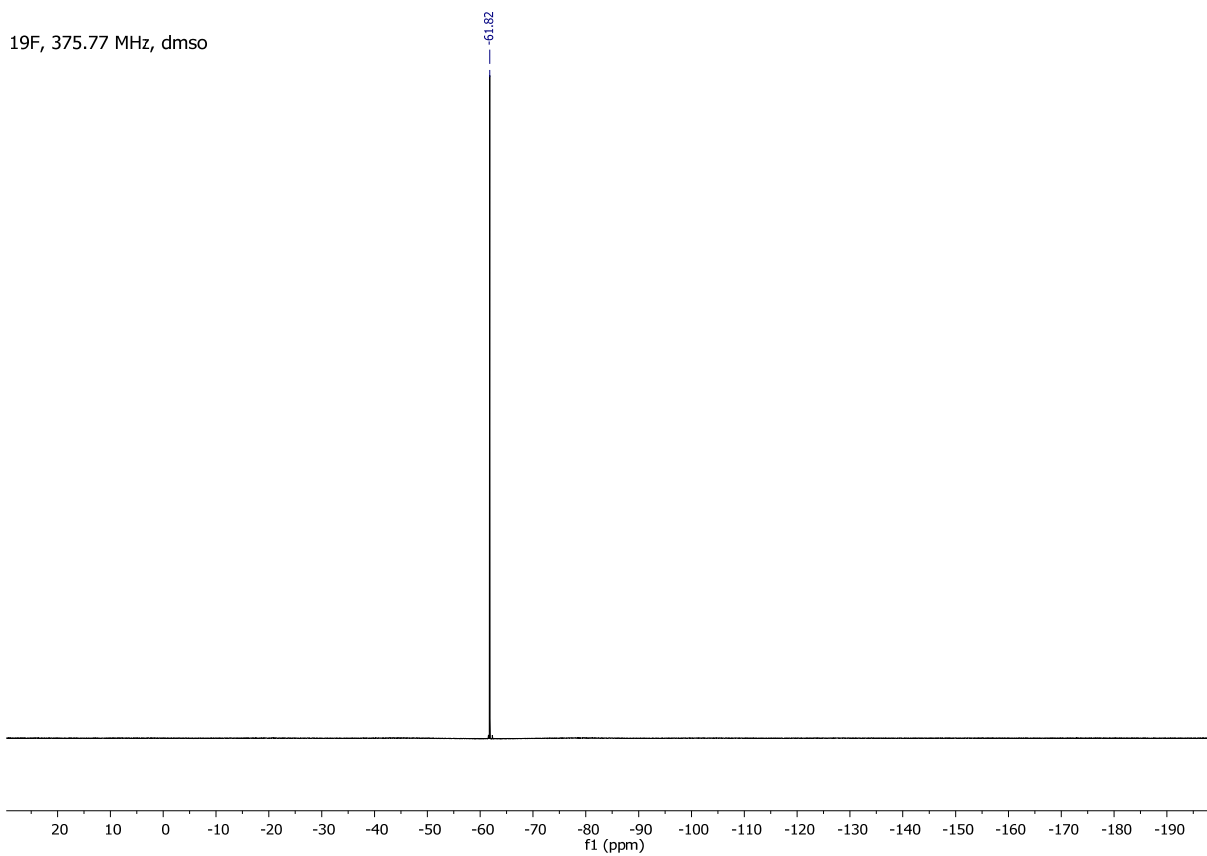

<sup>1</sup>H, 599.79 MHz, dmsO

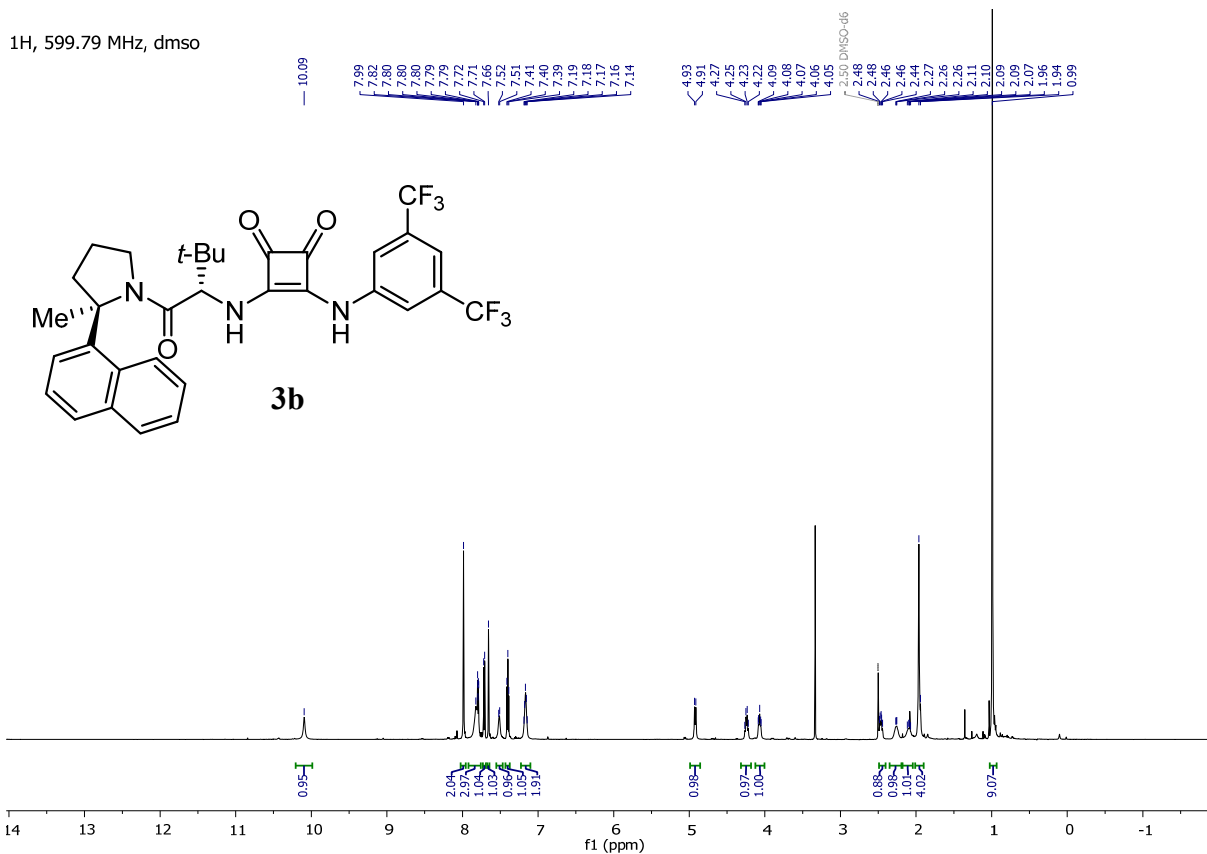

<sup>13</sup>C, 125.71 MHz, dmsO

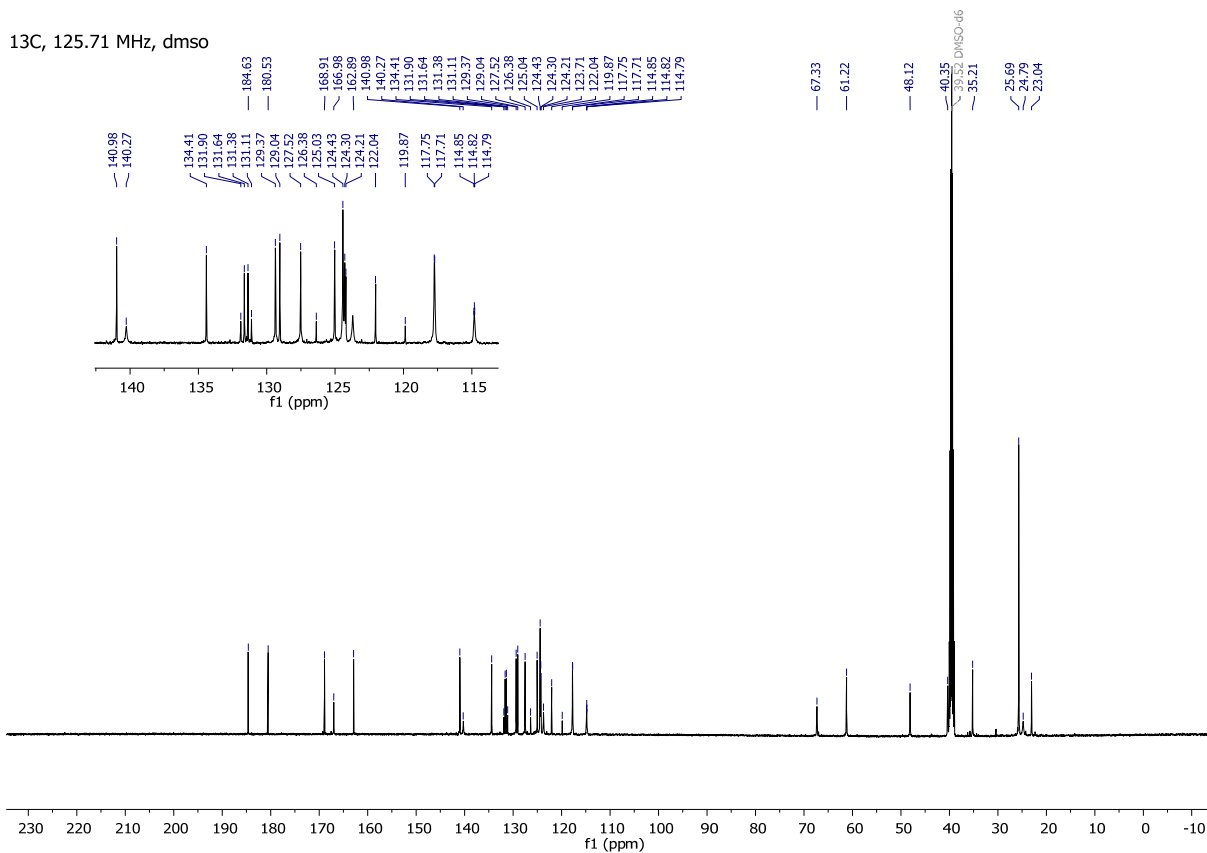

19F, 375.77 MHz, dms0

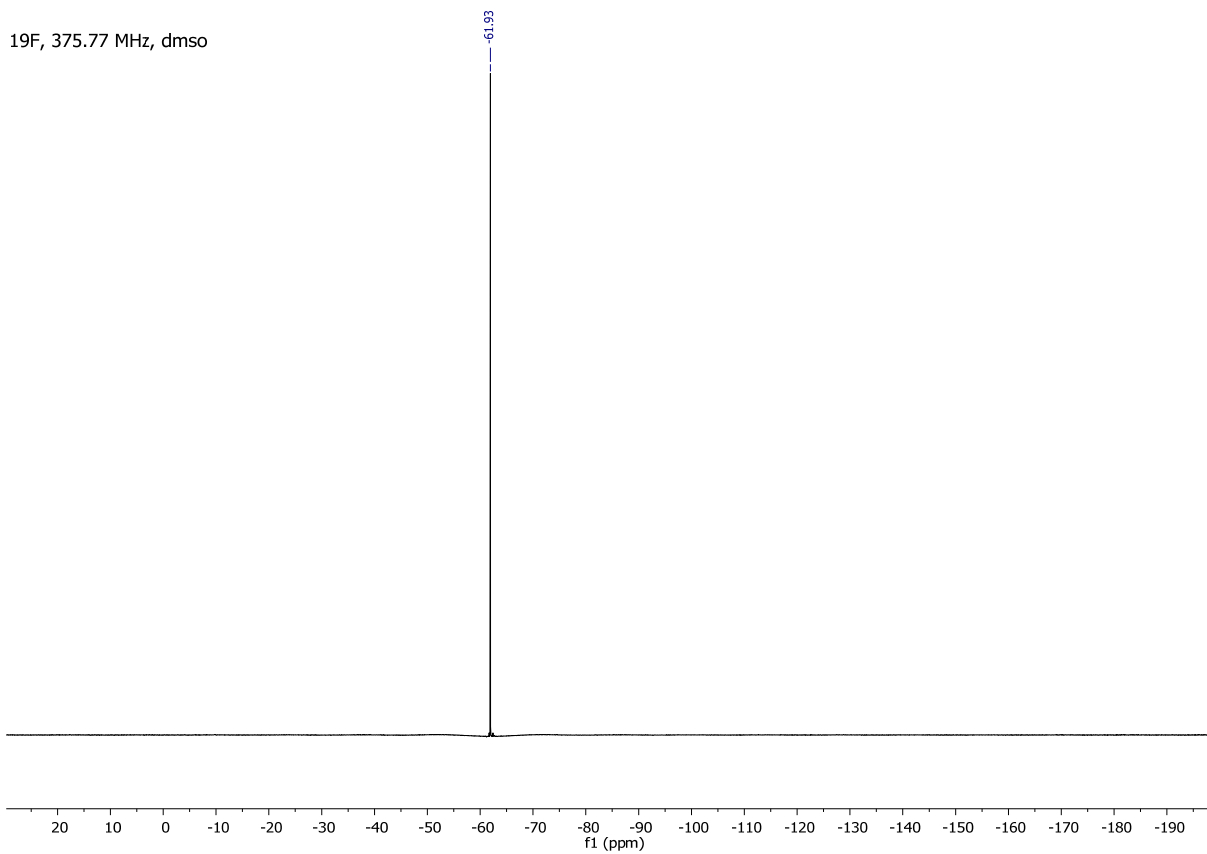

1H, 599.79 MHz, dms0

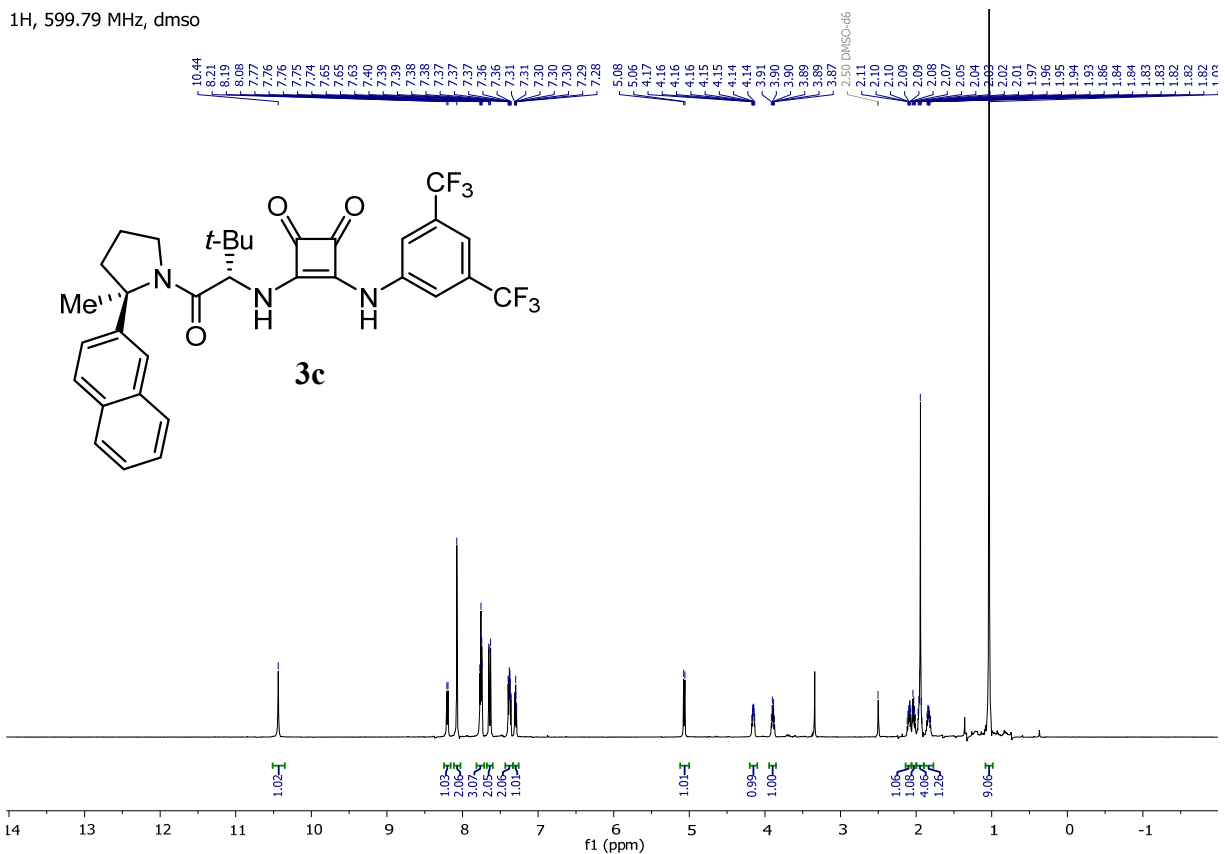

13C, 125.71 MHz, dms0

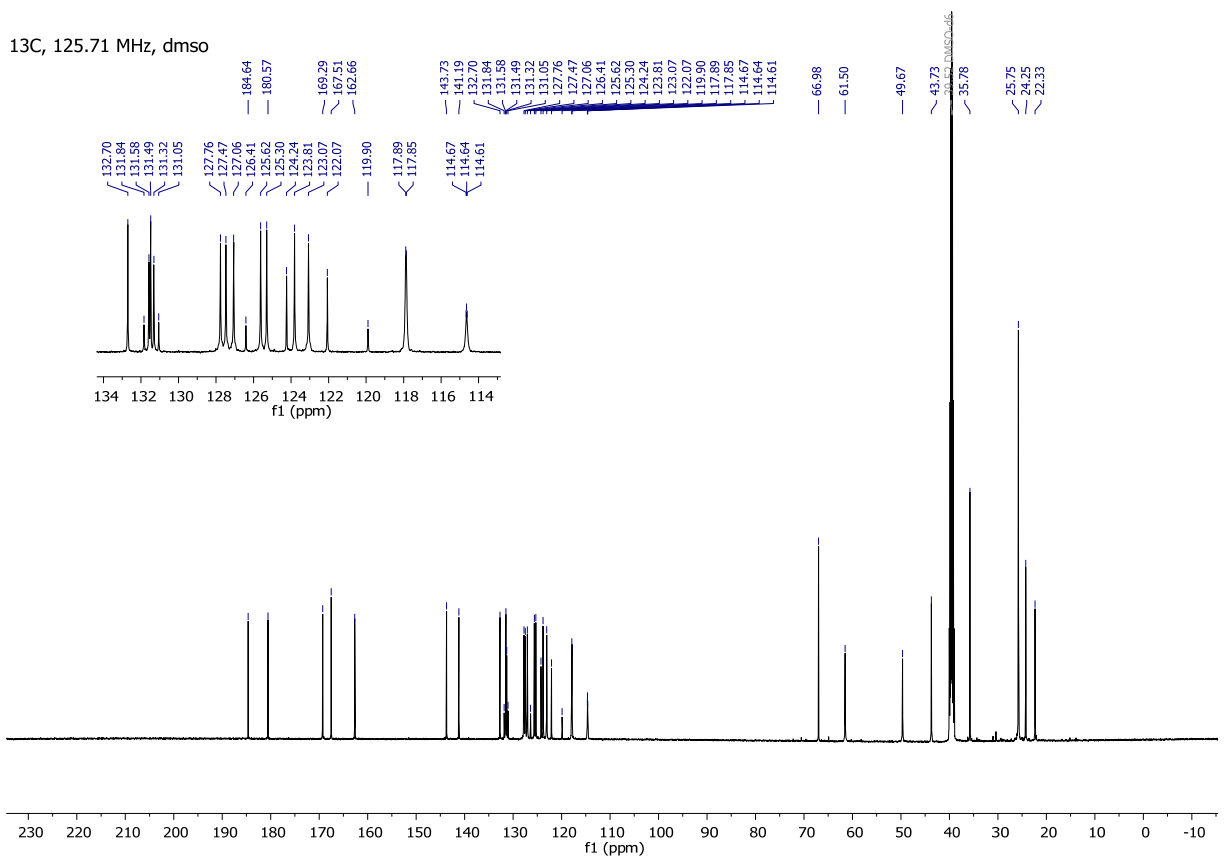

19F, 375.77 MHz, dmso

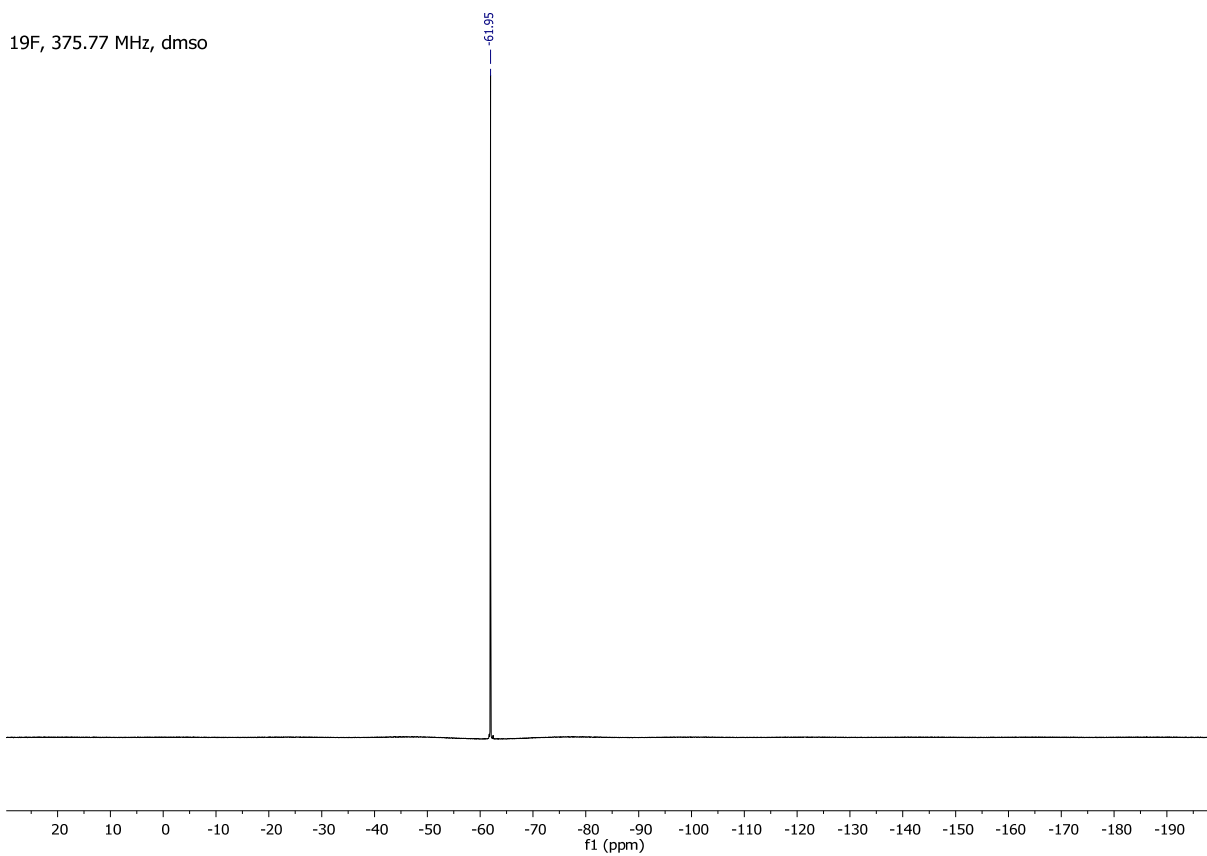

1H, 599.79 MHz, dms0

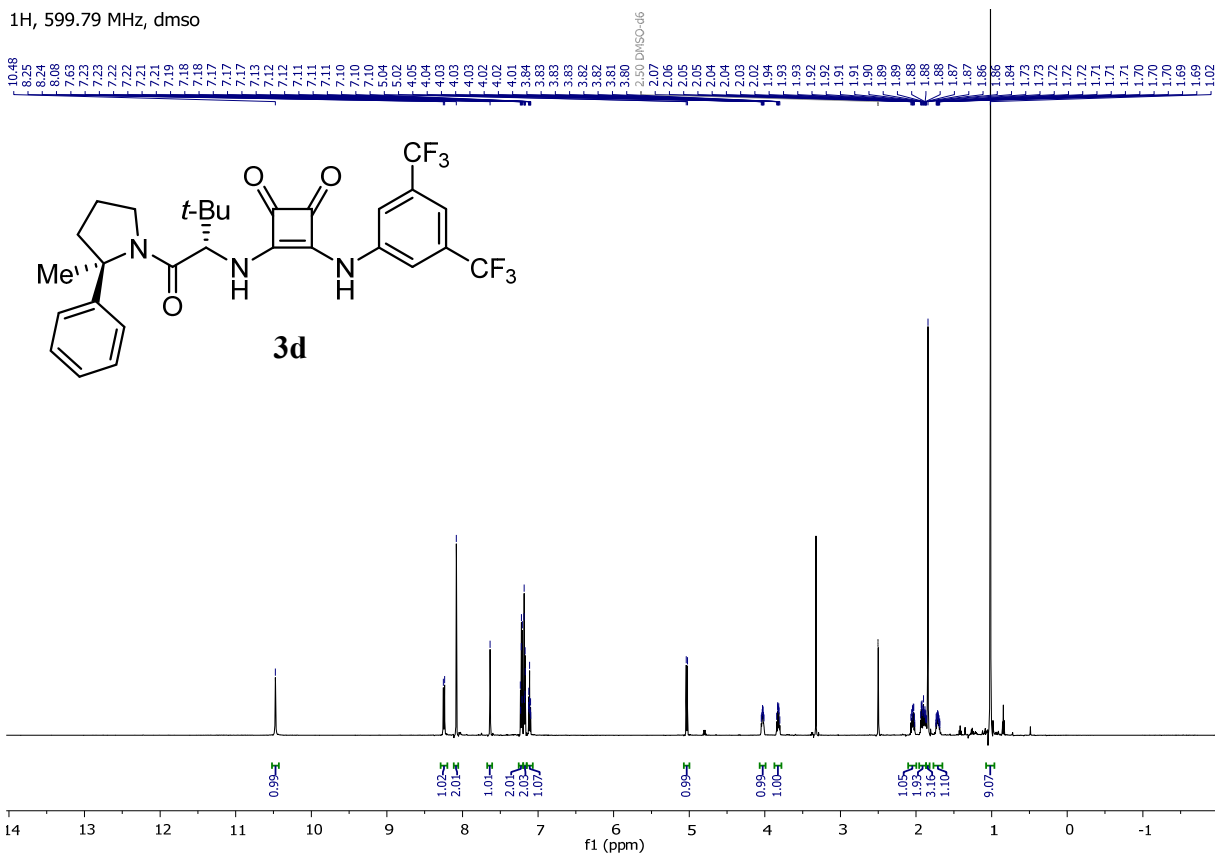

13C, 125.71 MHz, dms0

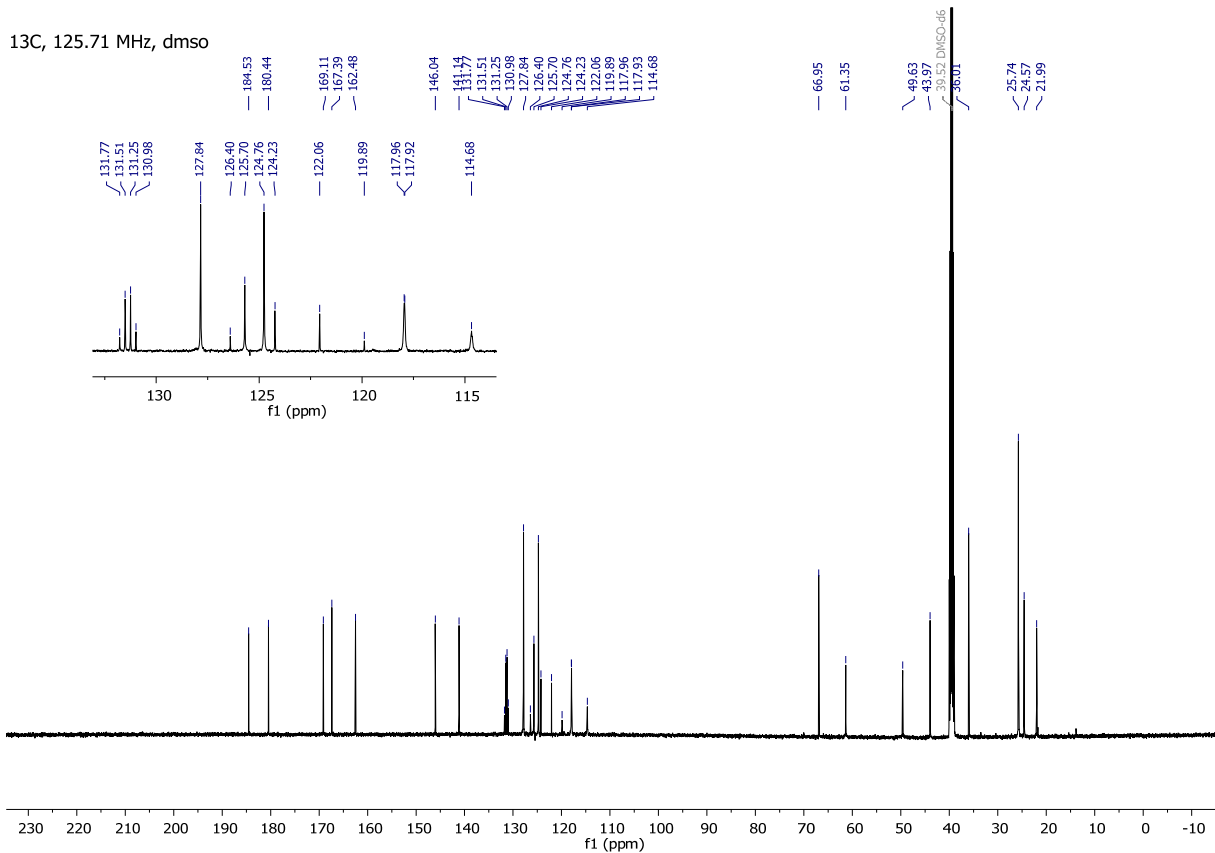



19F, 375.77 MHz, dmso

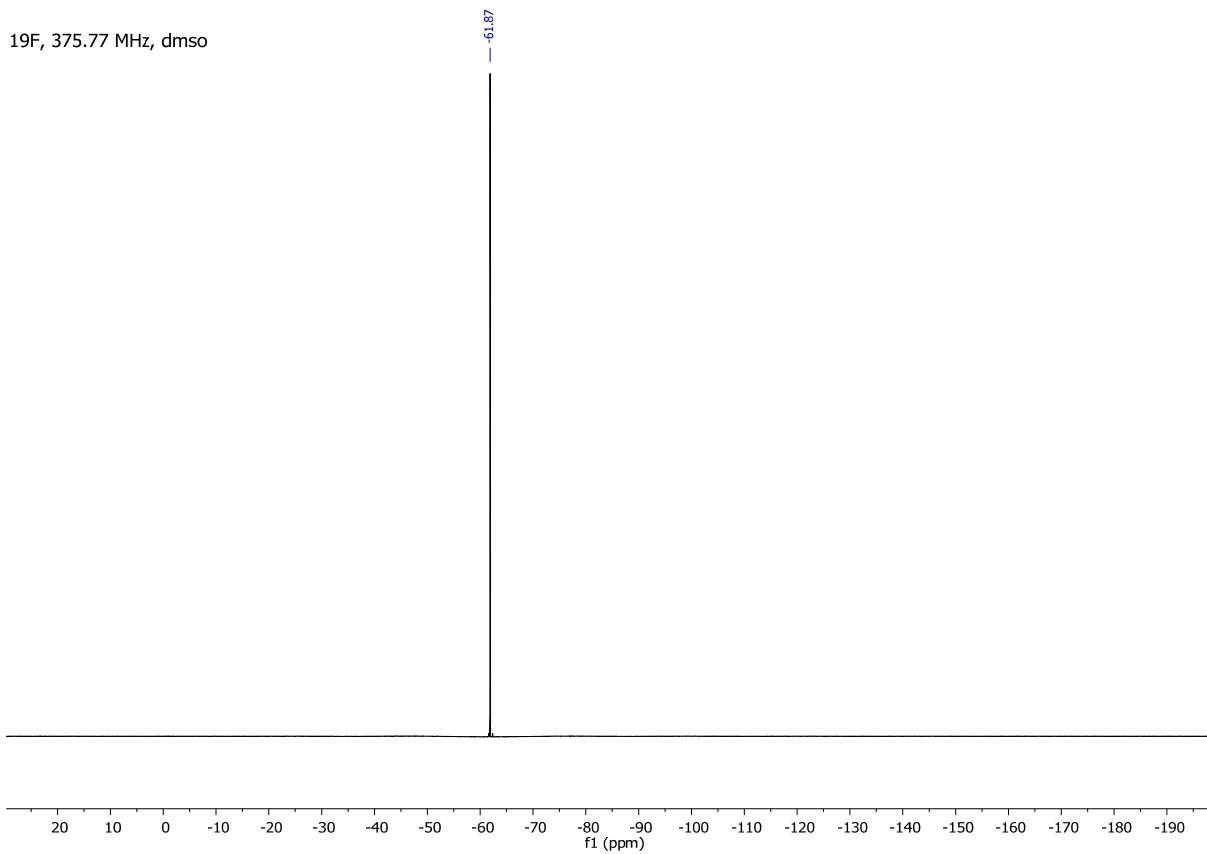

<sup>1</sup>H, 599.79 MHz, cdcl<sub>3</sub>

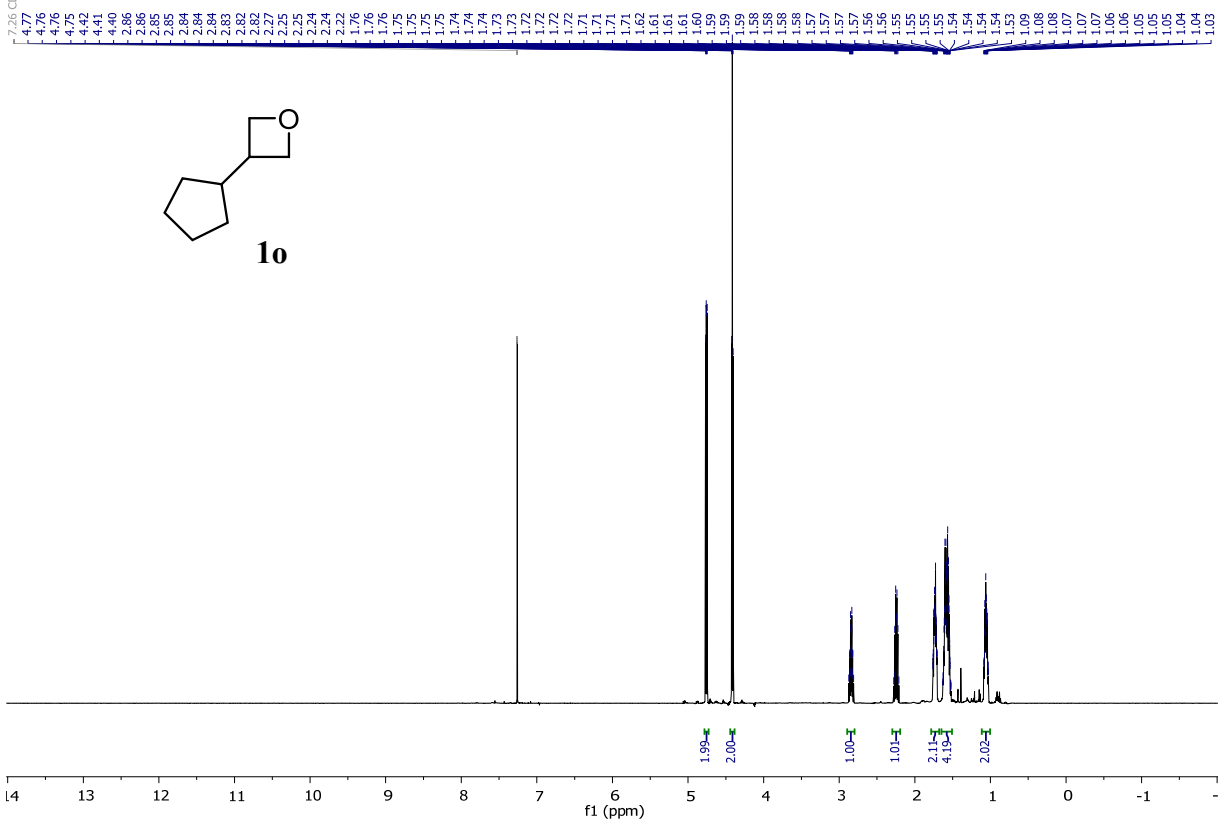

<sup>13</sup>C, 150.83 MHz, cdcl<sub>3</sub>

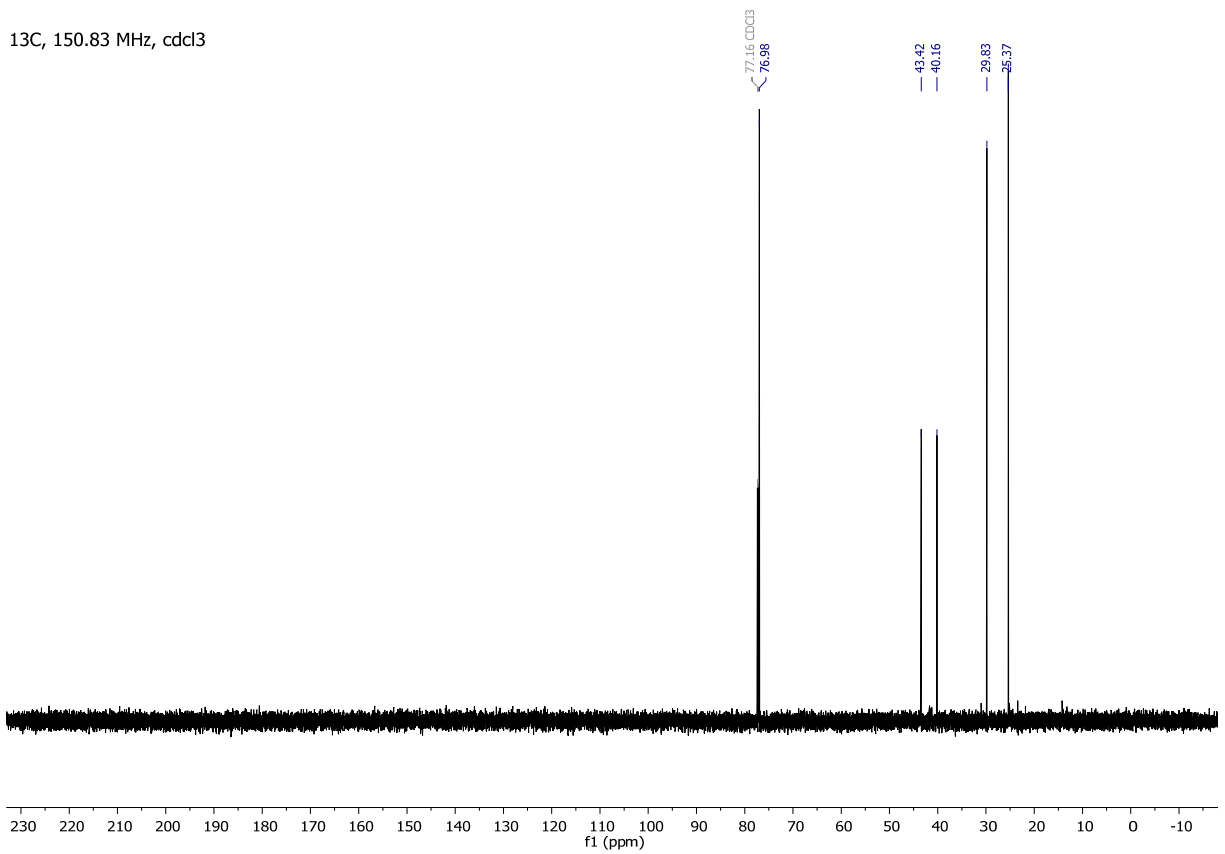

<sup>1</sup>H, 599.79 MHz, cdcl<sub>3</sub>

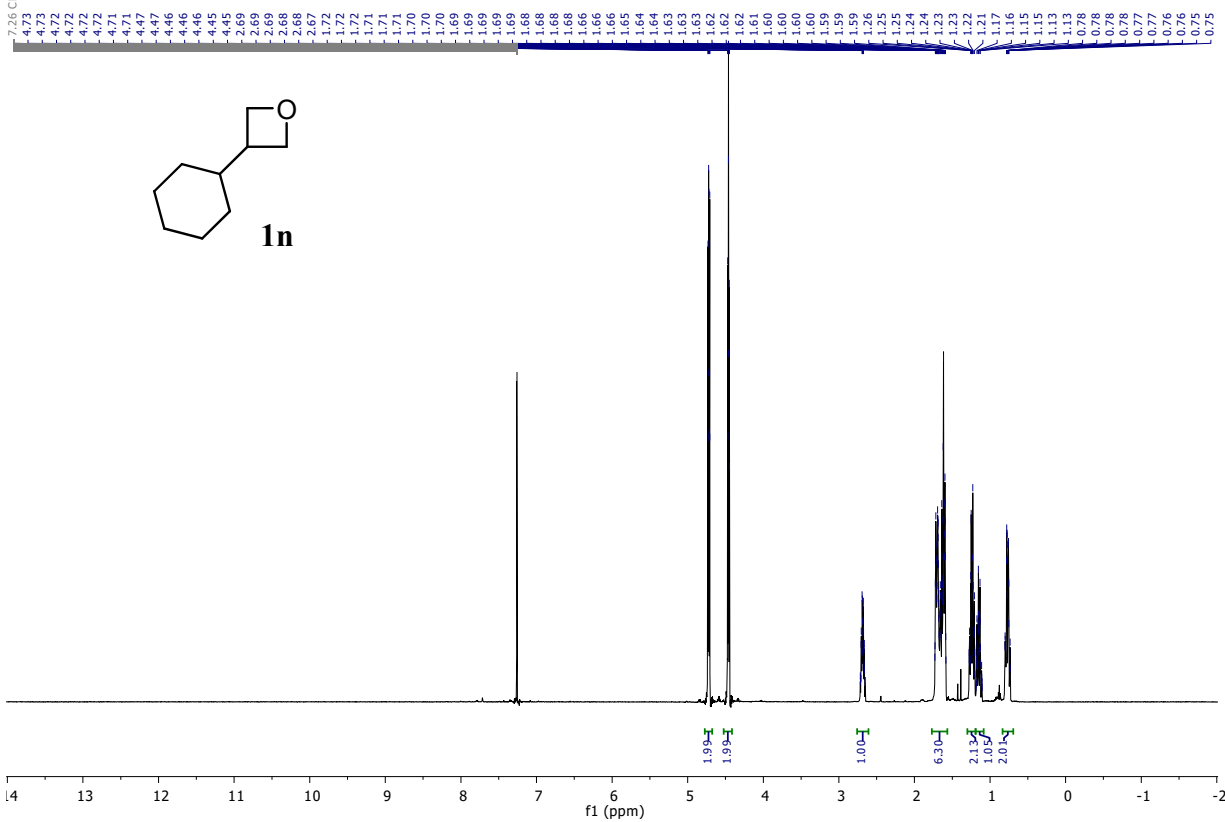

<sup>13</sup>C, 150.83 MHz, cdcl<sub>3</sub>

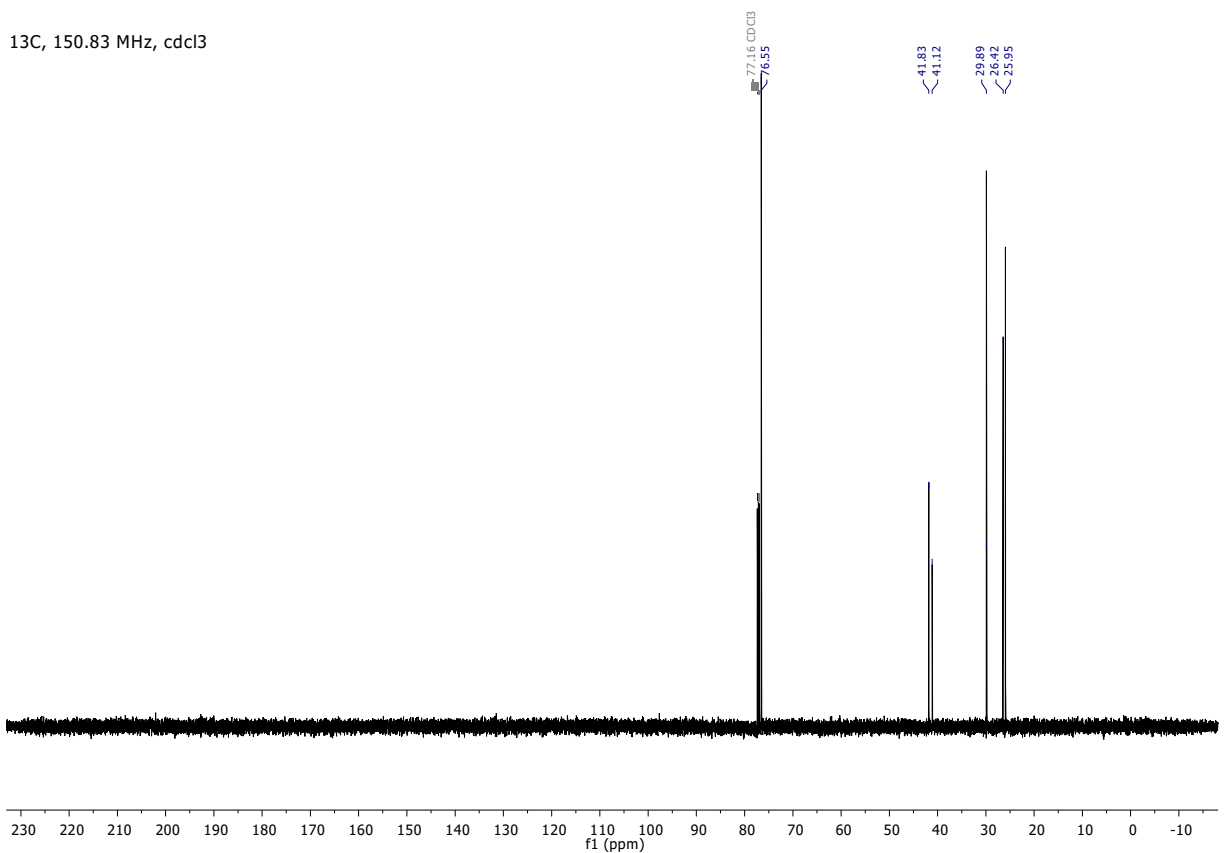



<sup>1</sup>H, 499.61 MHz, cdCl<sub>3</sub>

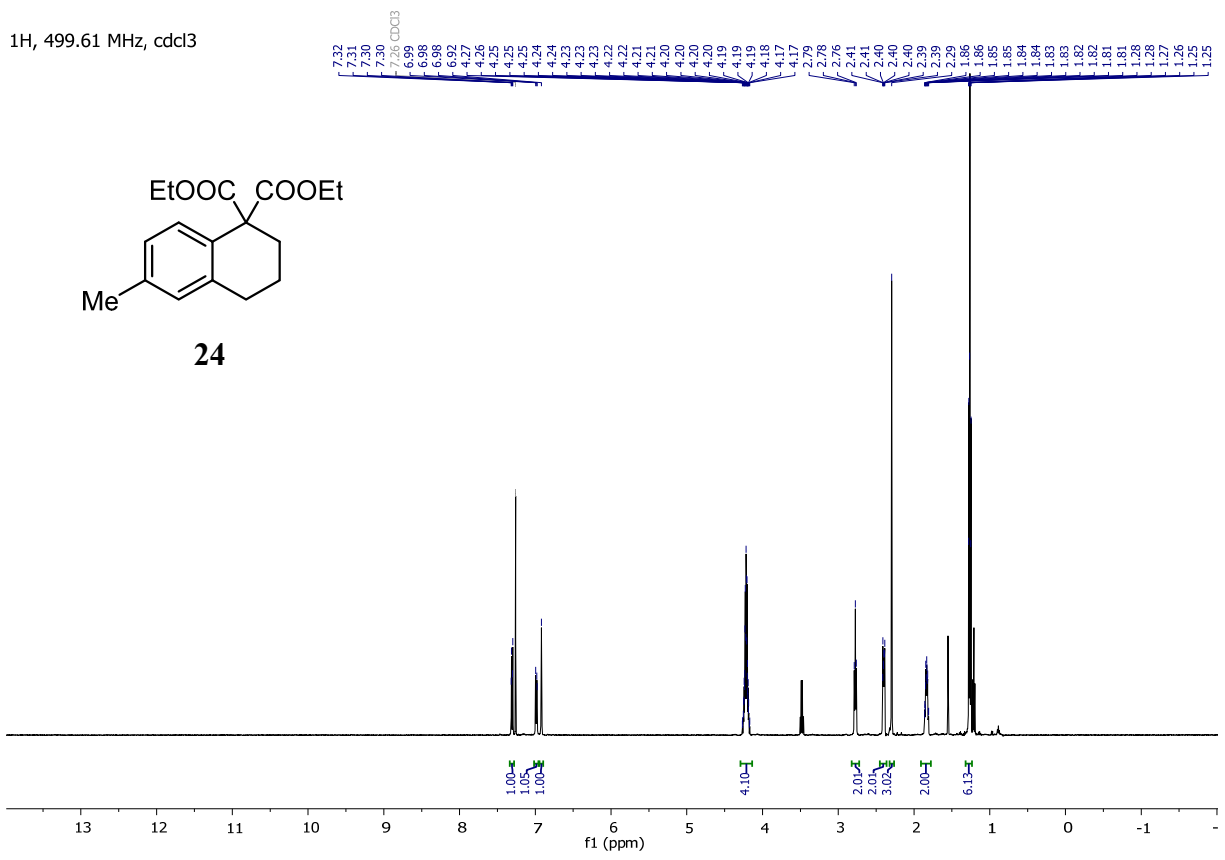

<sup>13</sup>C, 125.78 MHz, cdCl<sub>3</sub>

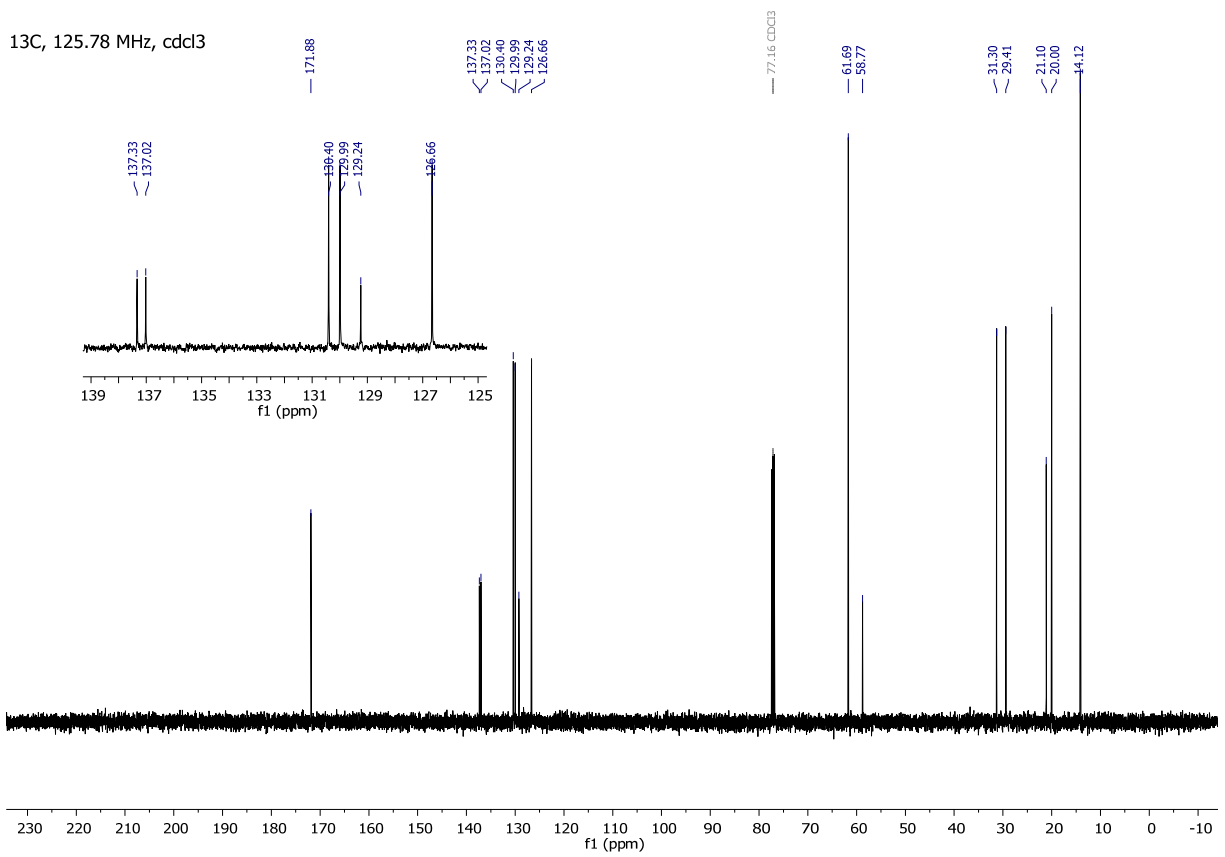

<sup>1</sup>H, 499.61 MHz, cdcl<sub>3</sub>

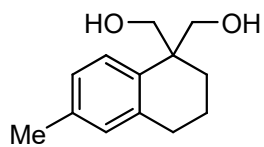

**25**

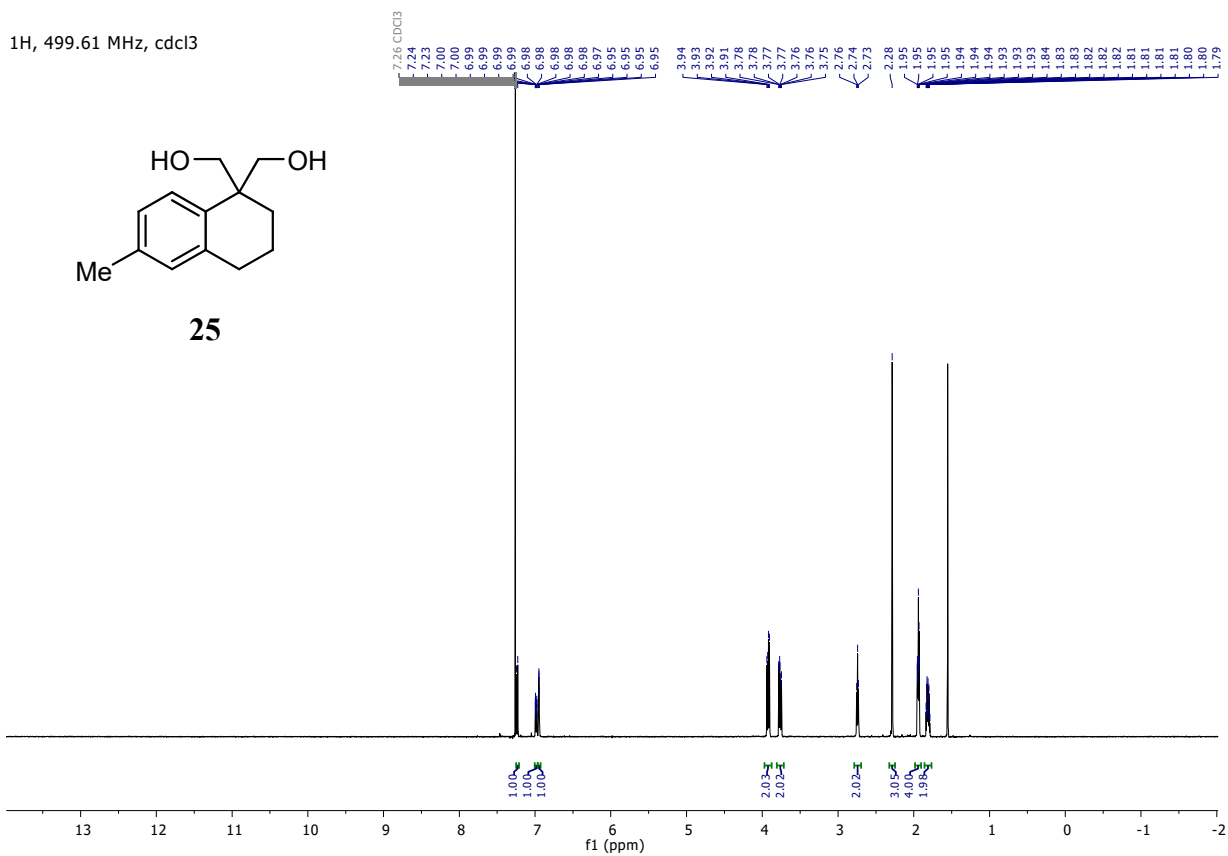

<sup>13</sup>C, 125.71 MHz, cdcl<sub>3</sub>

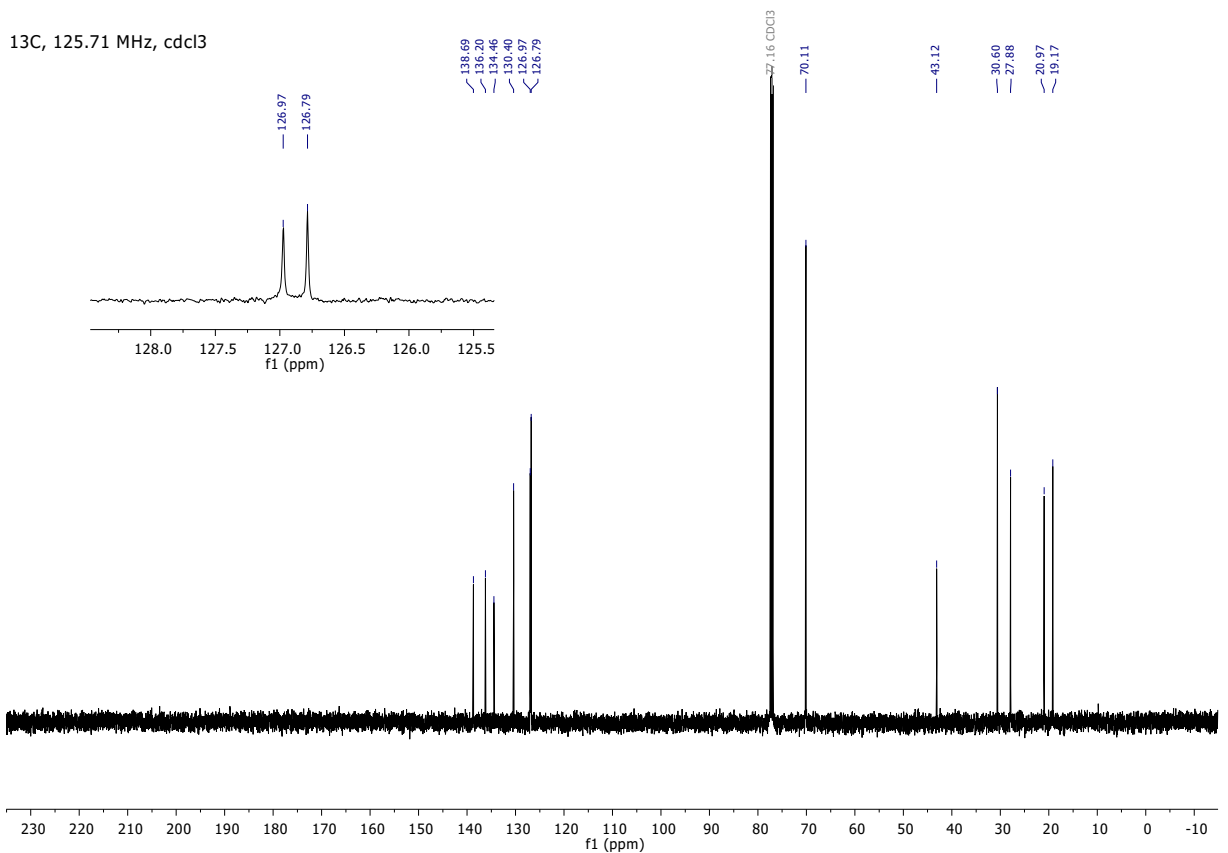

<sup>1</sup>H, 599.79 MHz, cdCl<sub>3</sub>

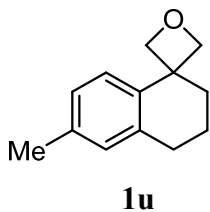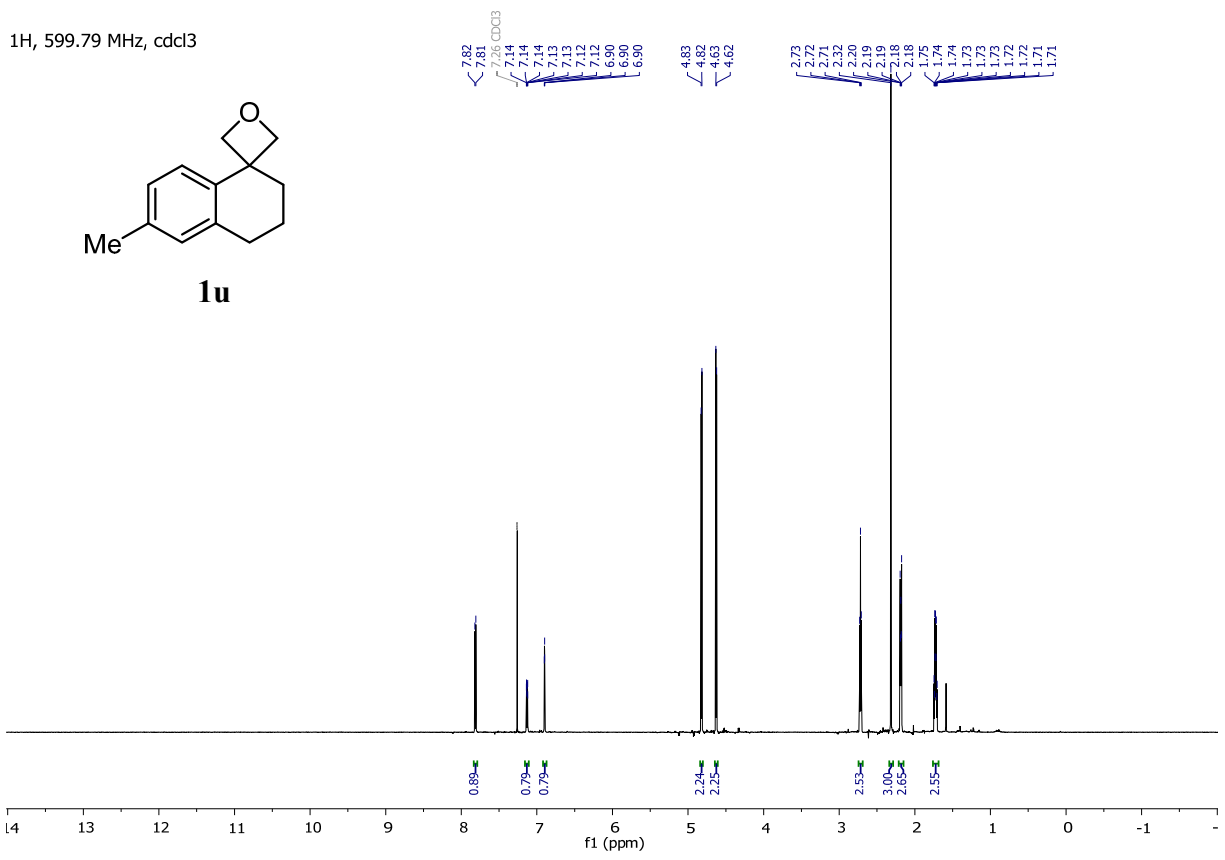

<sup>13</sup>C, 150.83 MHz, cdCl<sub>3</sub>

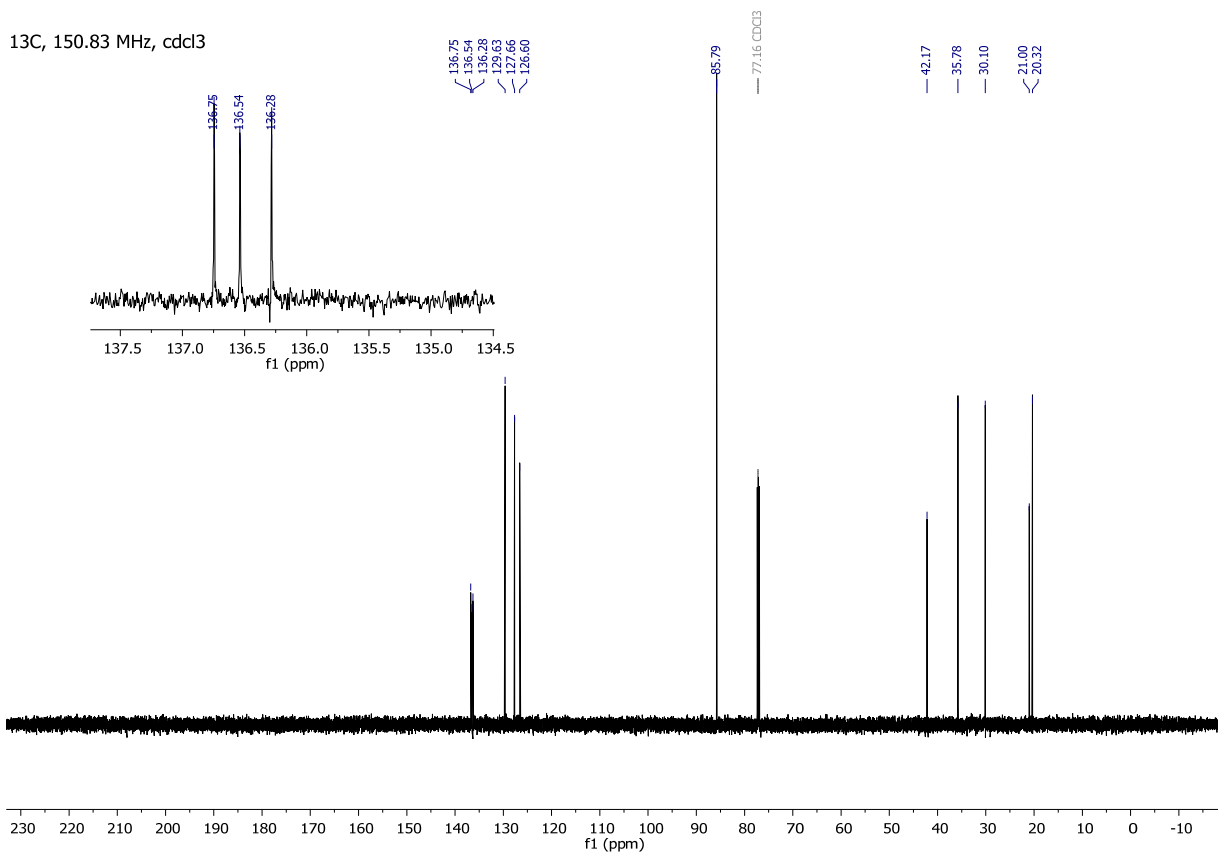

1H, 500.18 MHz, cdcl3

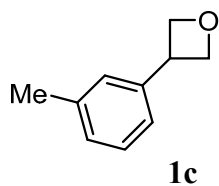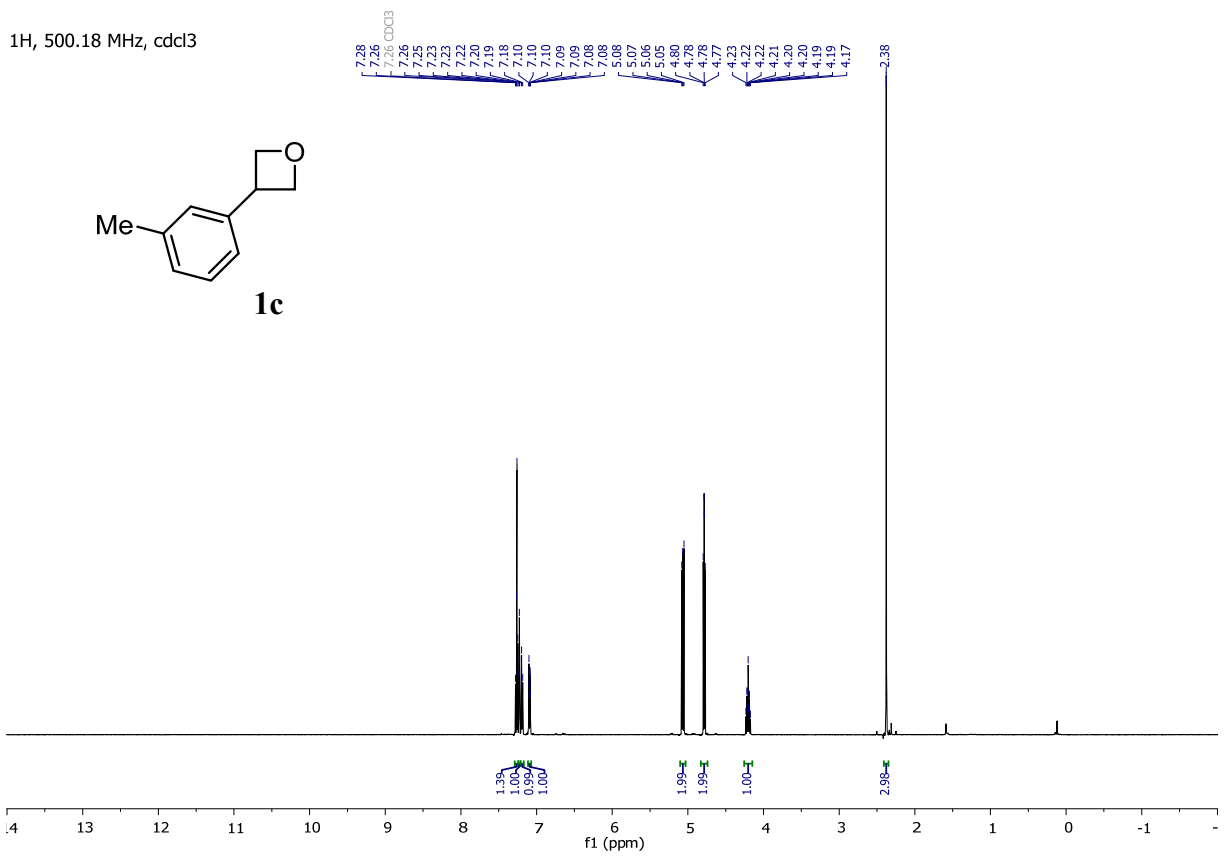

13C, 125.78 MHz, cdcl3

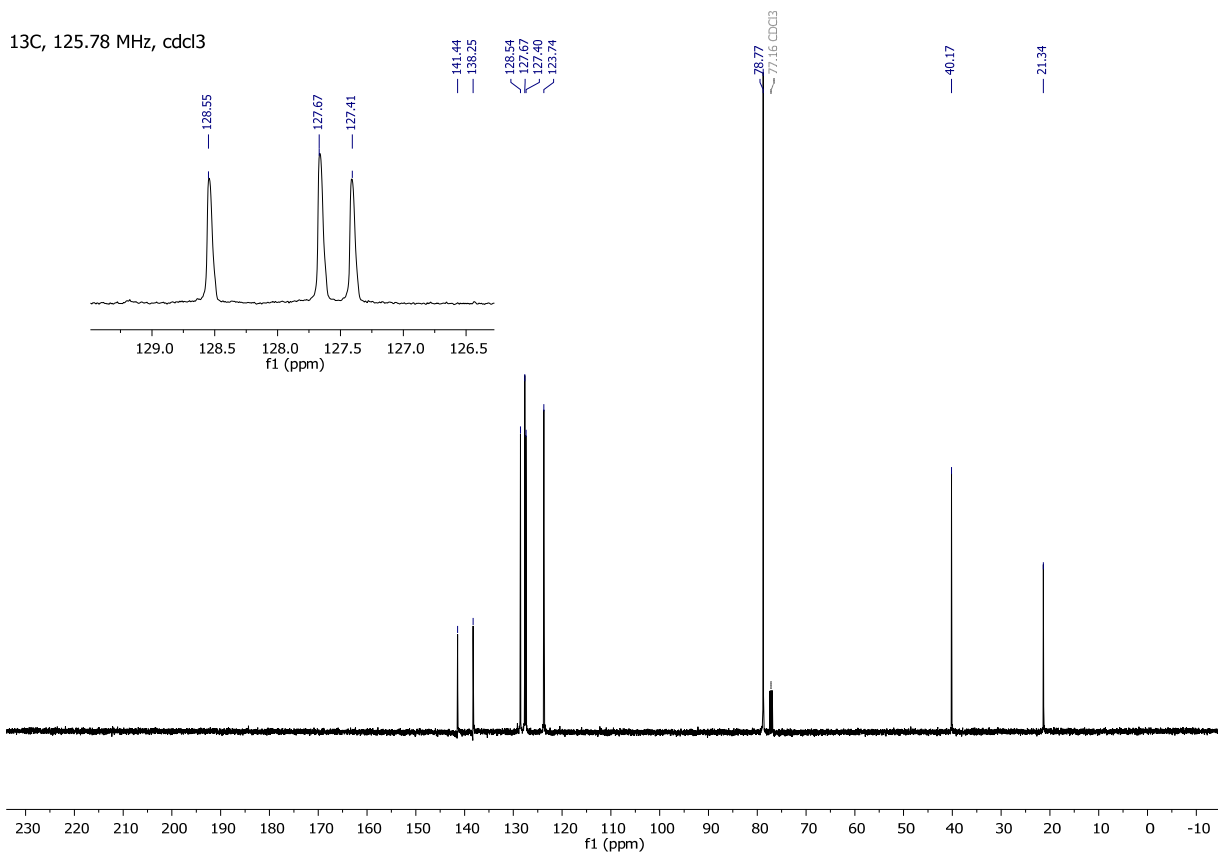



<sup>1</sup>H, 599.79 MHz, cdcl<sub>3</sub>

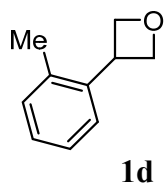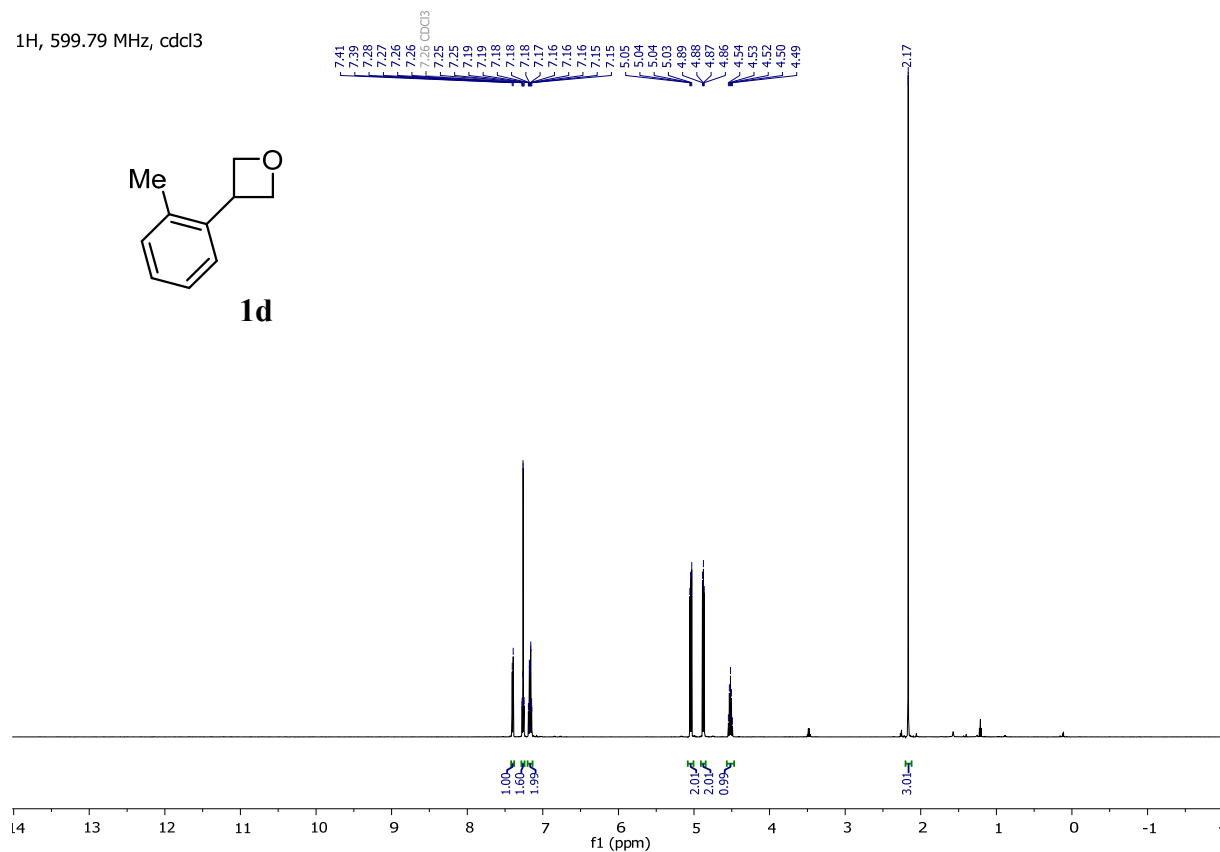

<sup>13</sup>C, 125.78 MHz, cdcl<sub>3</sub>

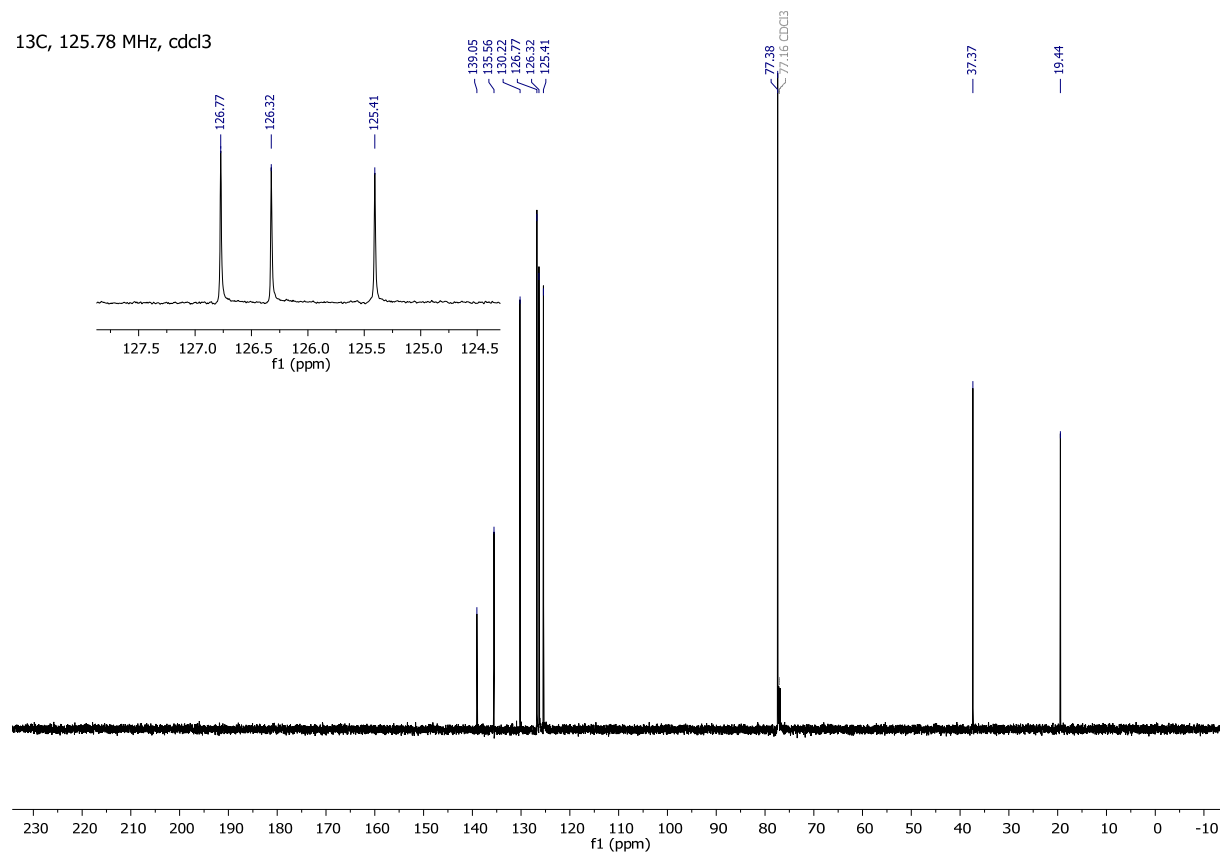

<sup>1</sup>H, 599.79 MHz, cdCl<sub>3</sub>

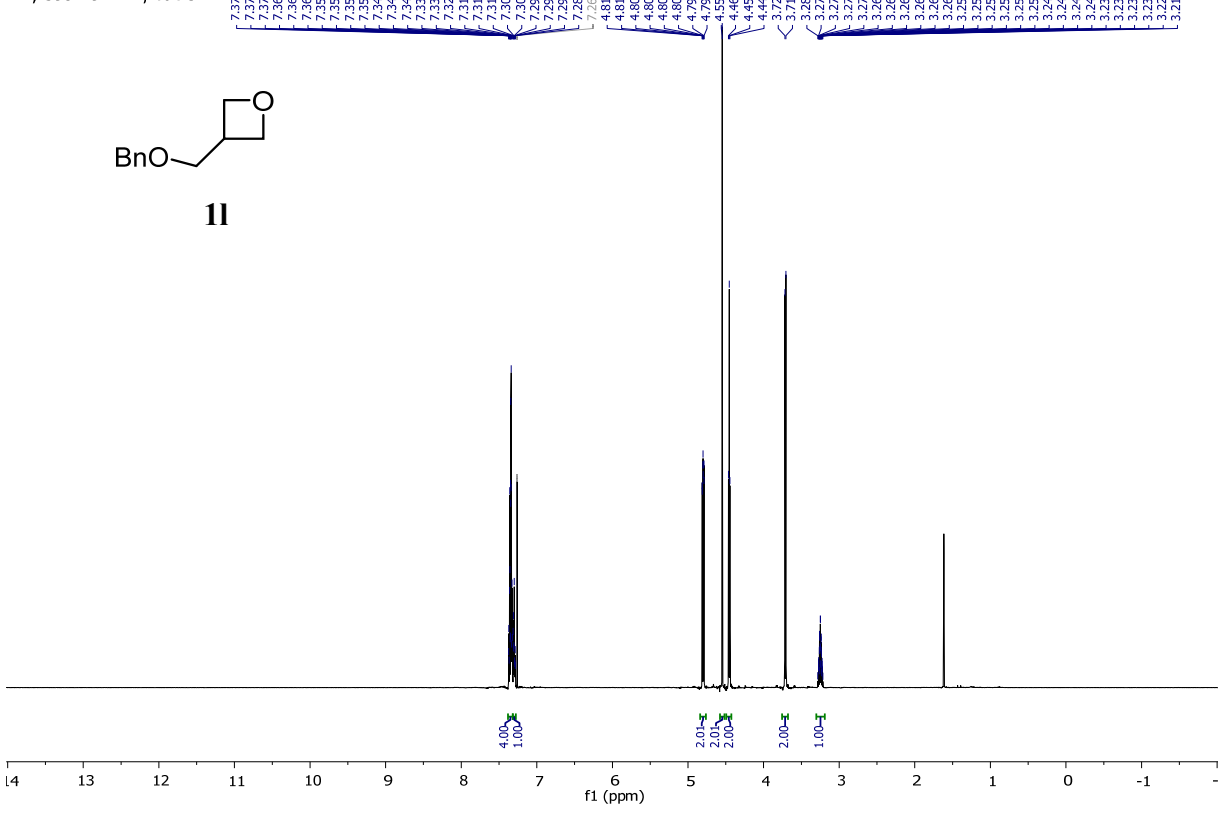

<sup>13</sup>C, 125.71 MHz, cdCl<sub>3</sub>

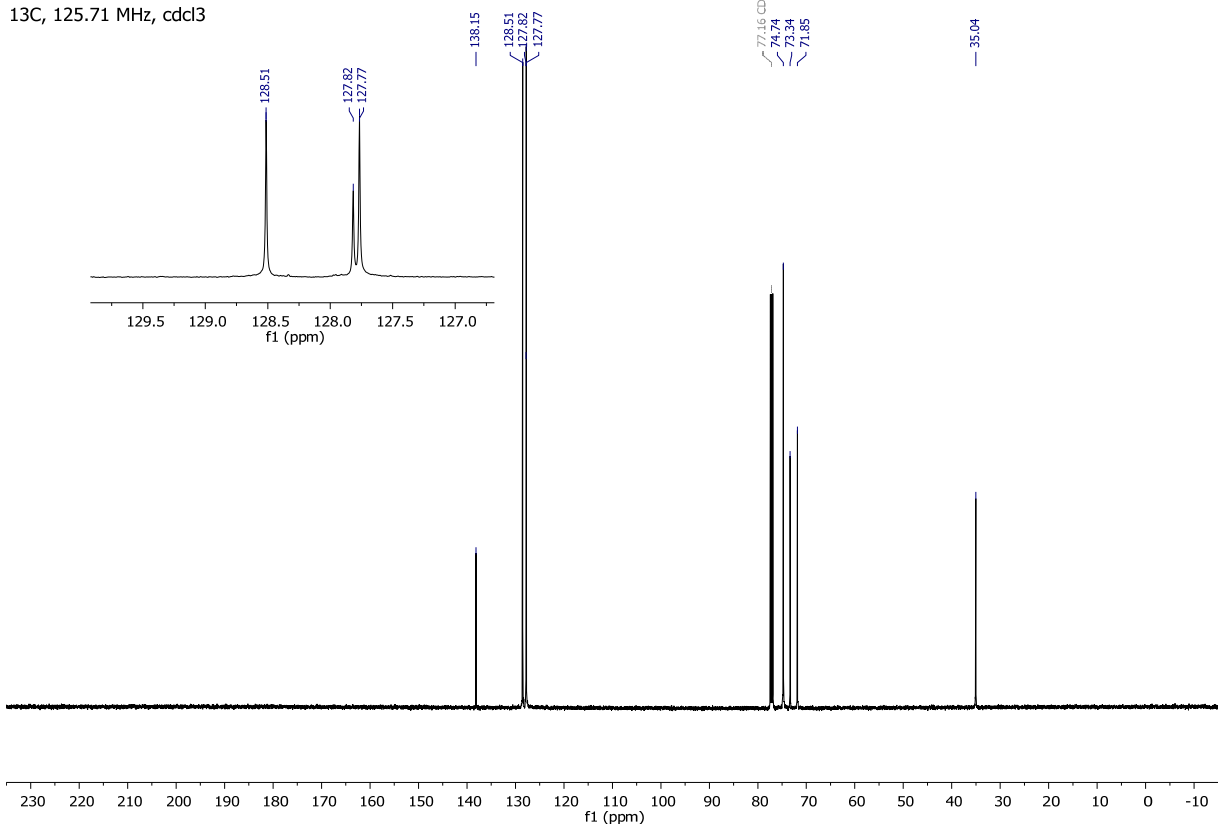

<sup>1</sup>H, 599.79 MHz, cdcl<sub>3</sub>

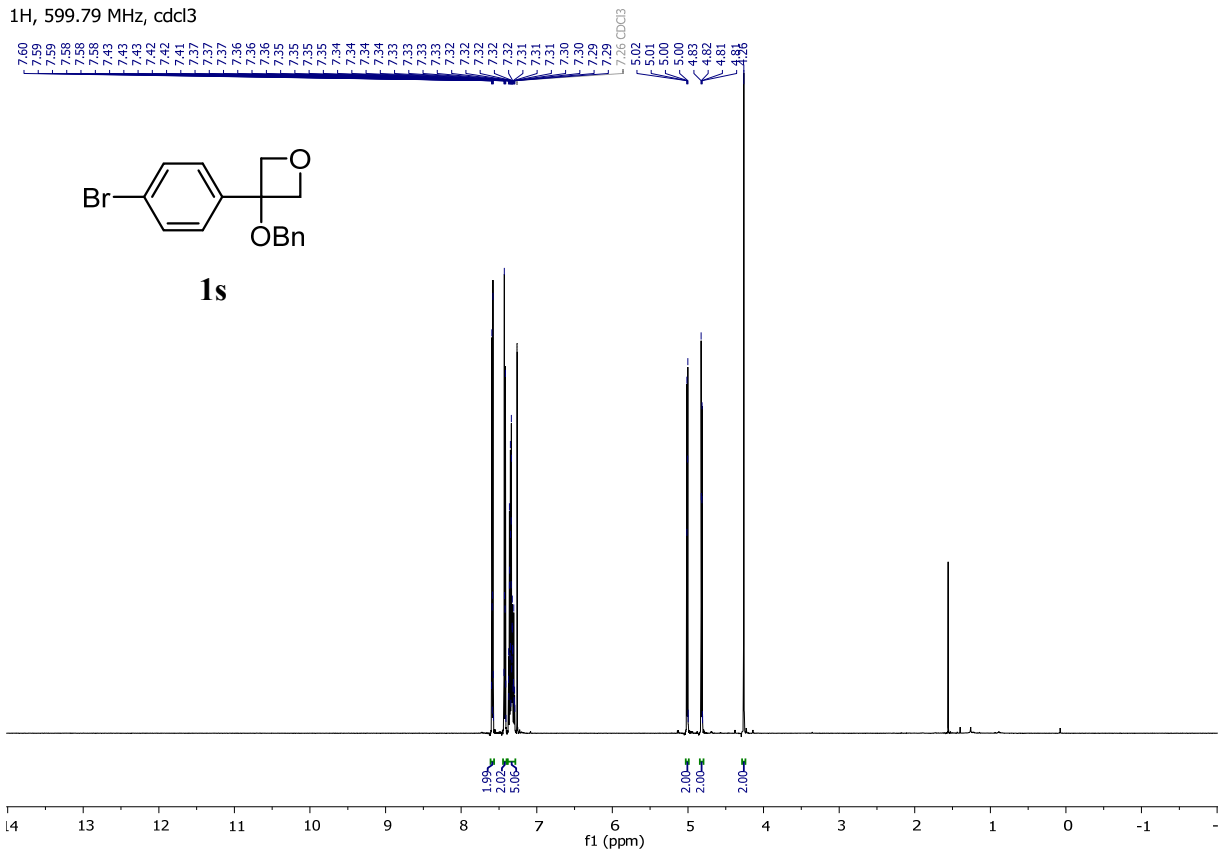

<sup>13</sup>C, 125.71 MHz, cdcl<sub>3</sub>

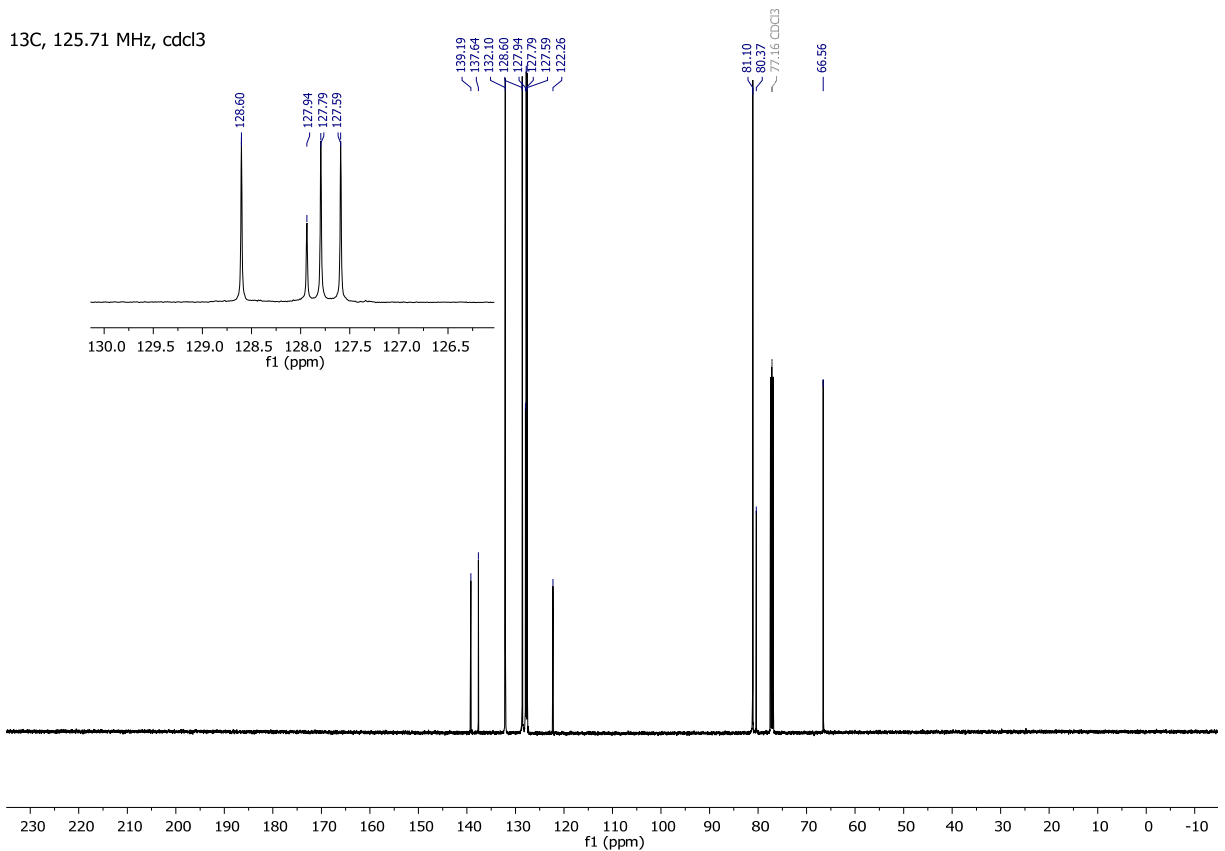

1H, 599.79 MHz, cdcl3

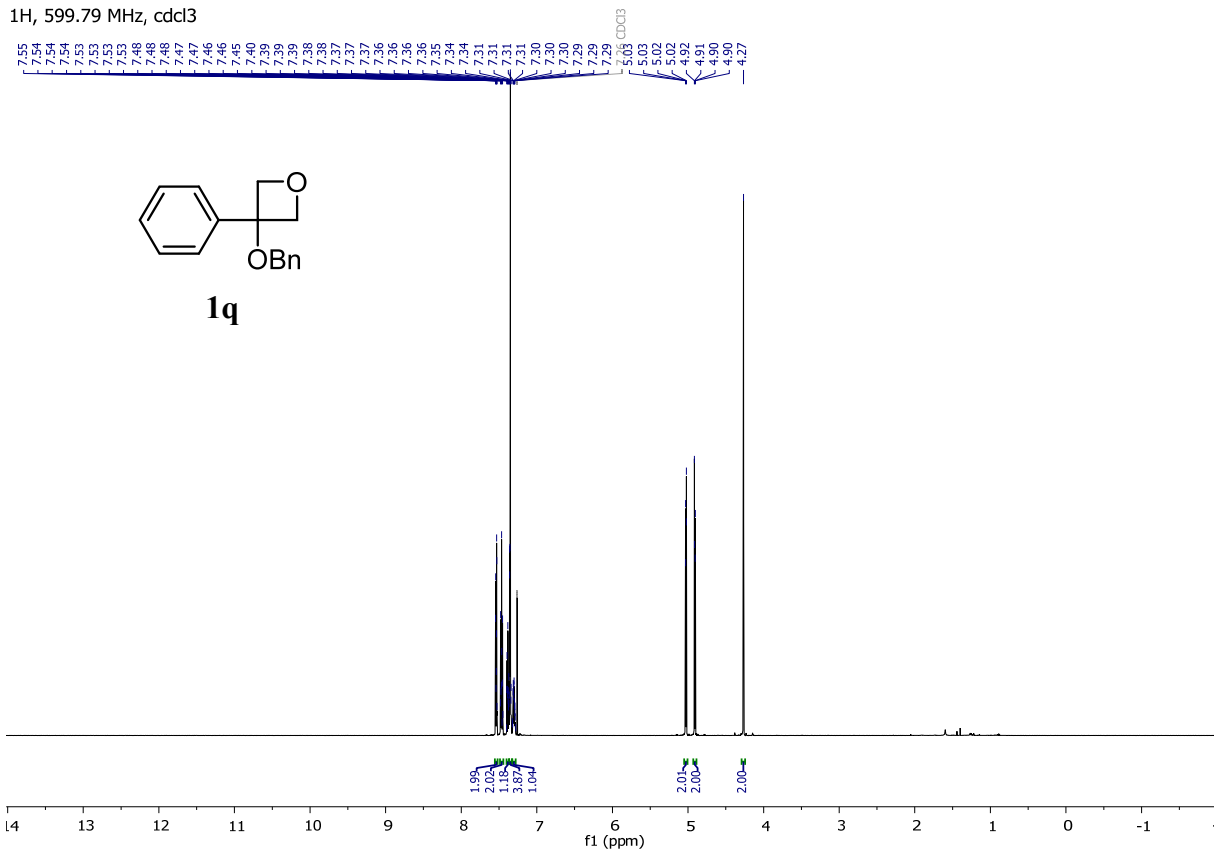

13C, 125.71 MHz, cdcl3

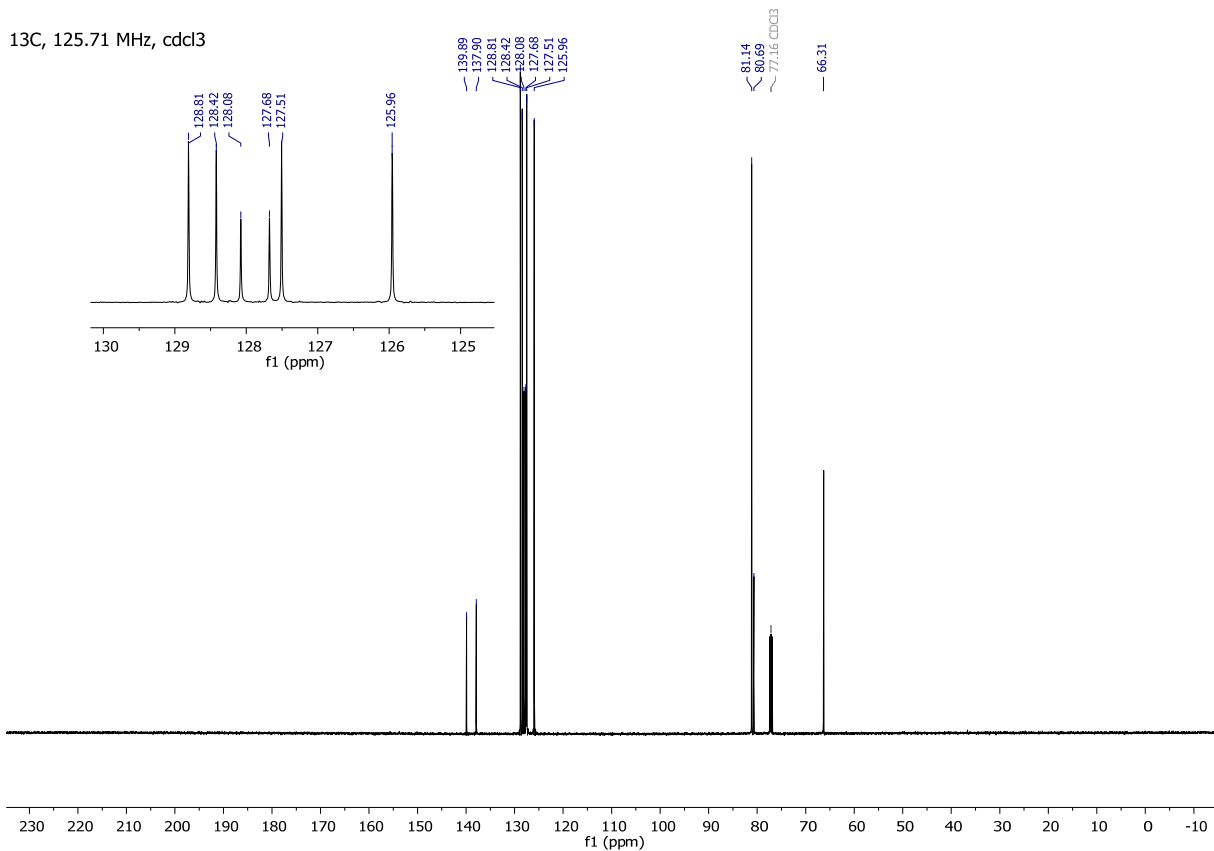

1H, 599.79 MHz, cdcl3

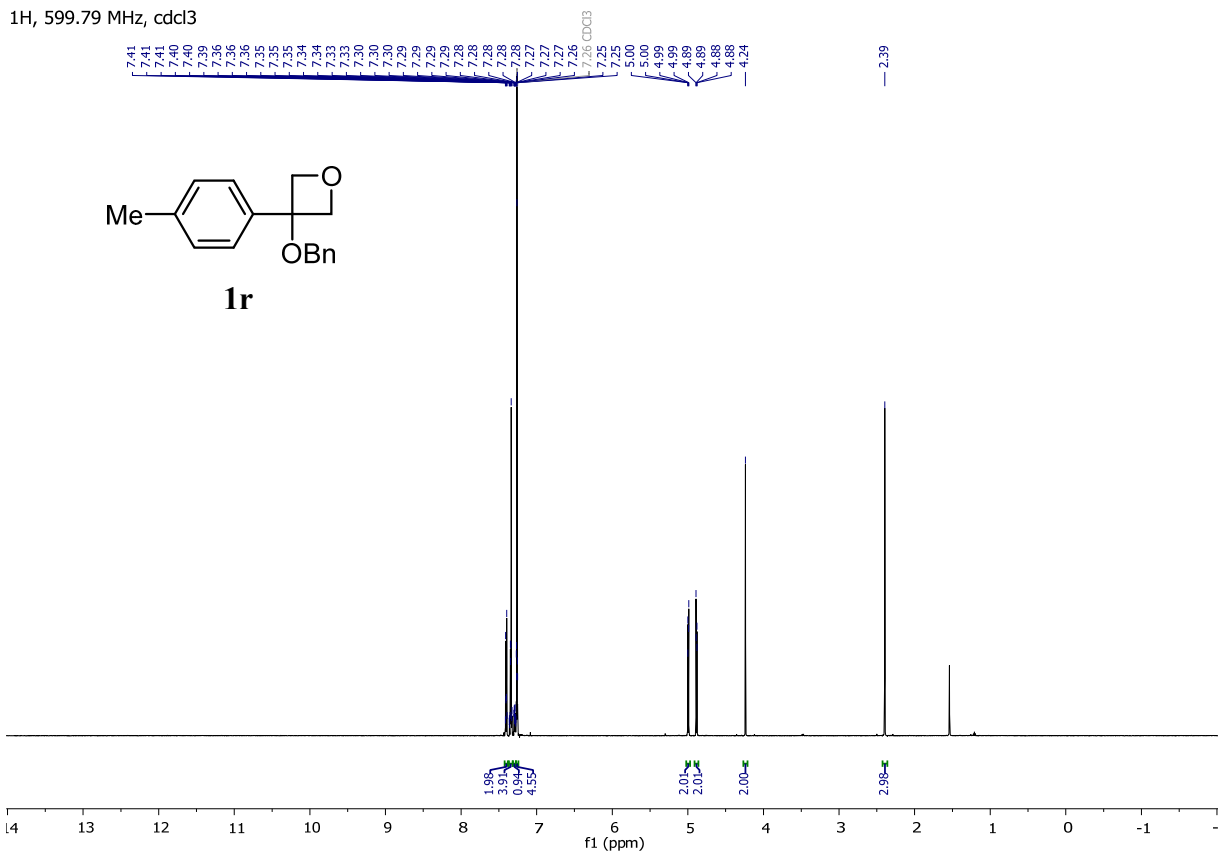

13C, 125.71 MHz, cdcl3

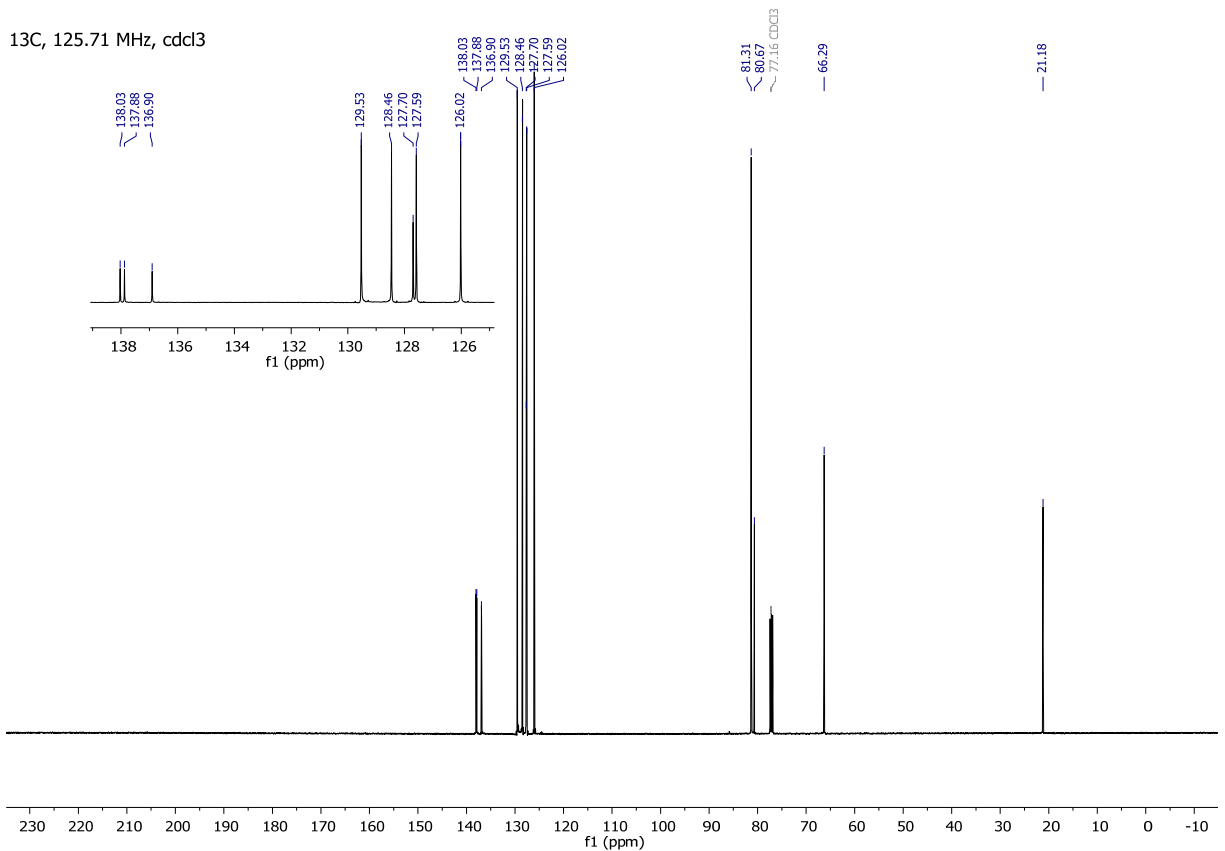

<sup>1</sup>H, 599.79 MHz, cdcl<sub>3</sub>

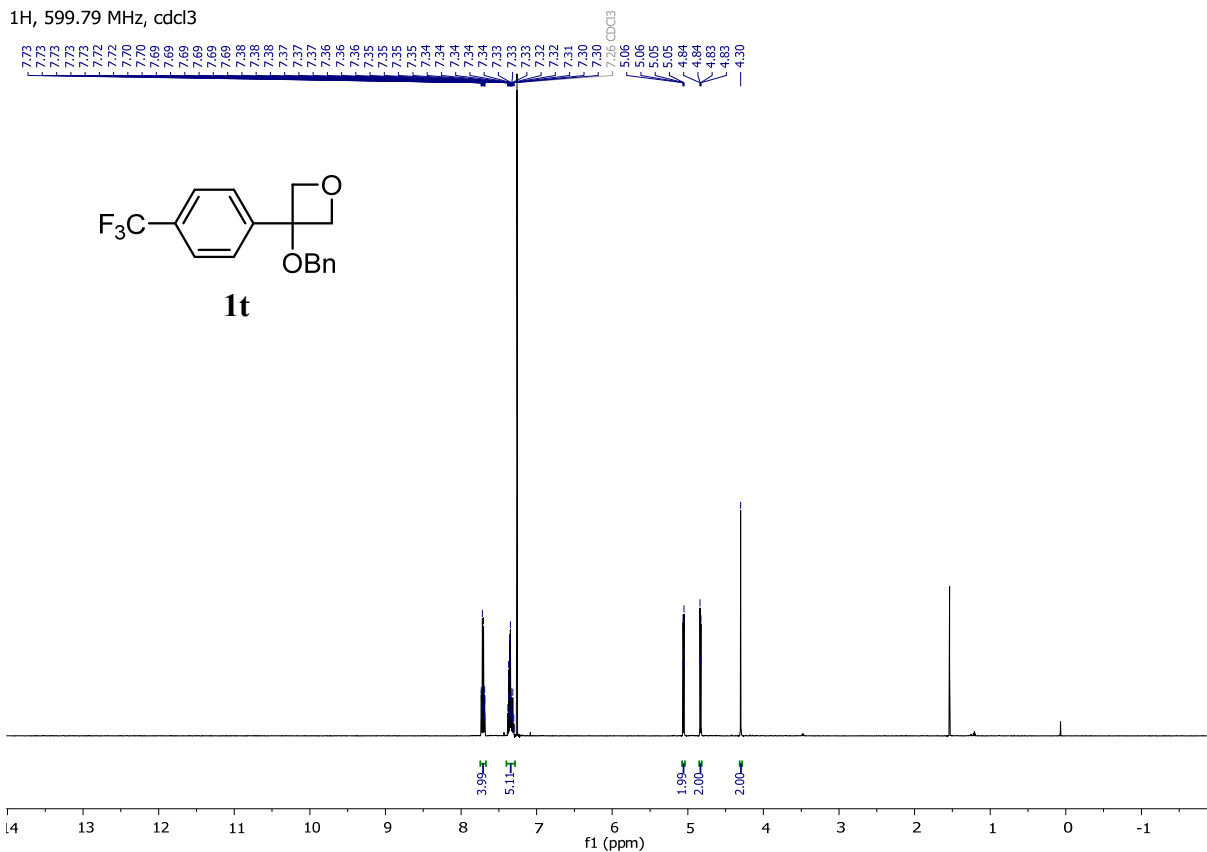

<sup>13</sup>C, 125.71 MHz, cdcl<sub>3</sub>

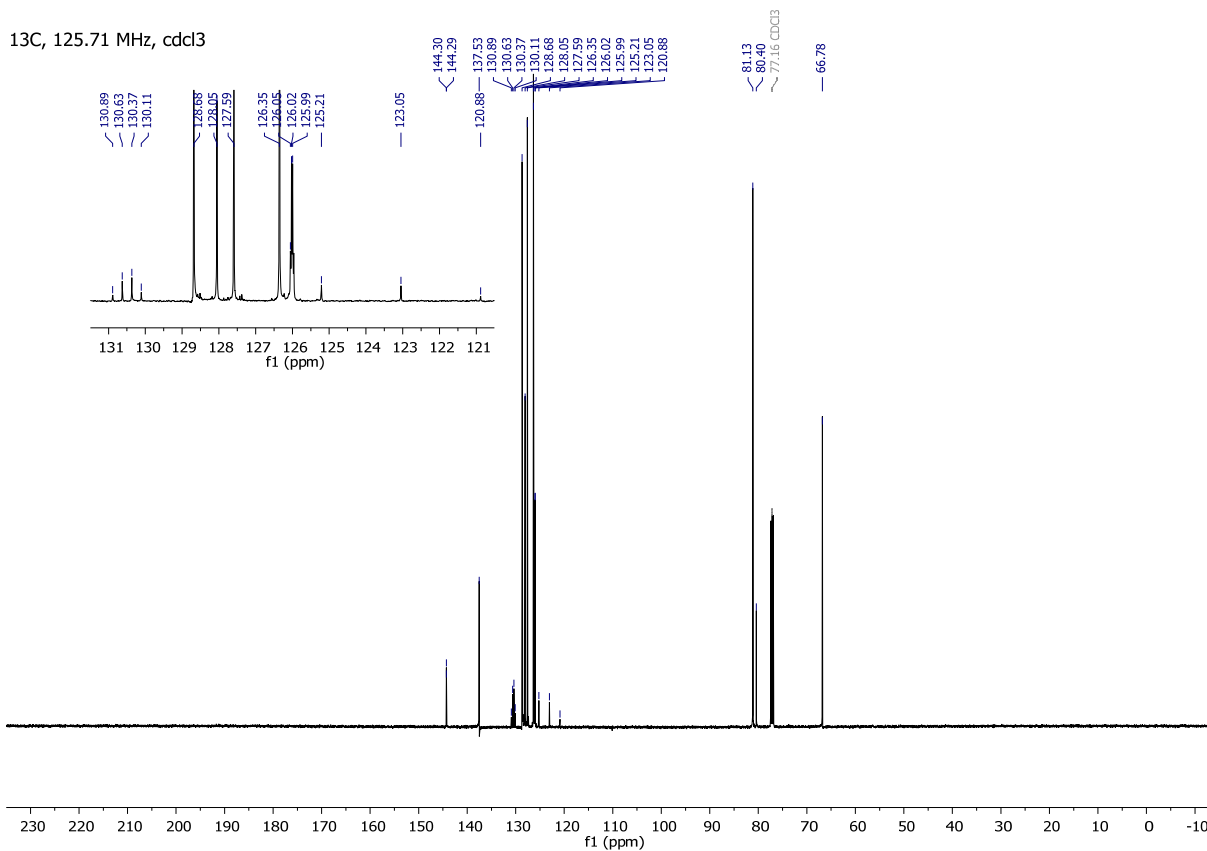

19F, 375.77 MHz, cdcl3

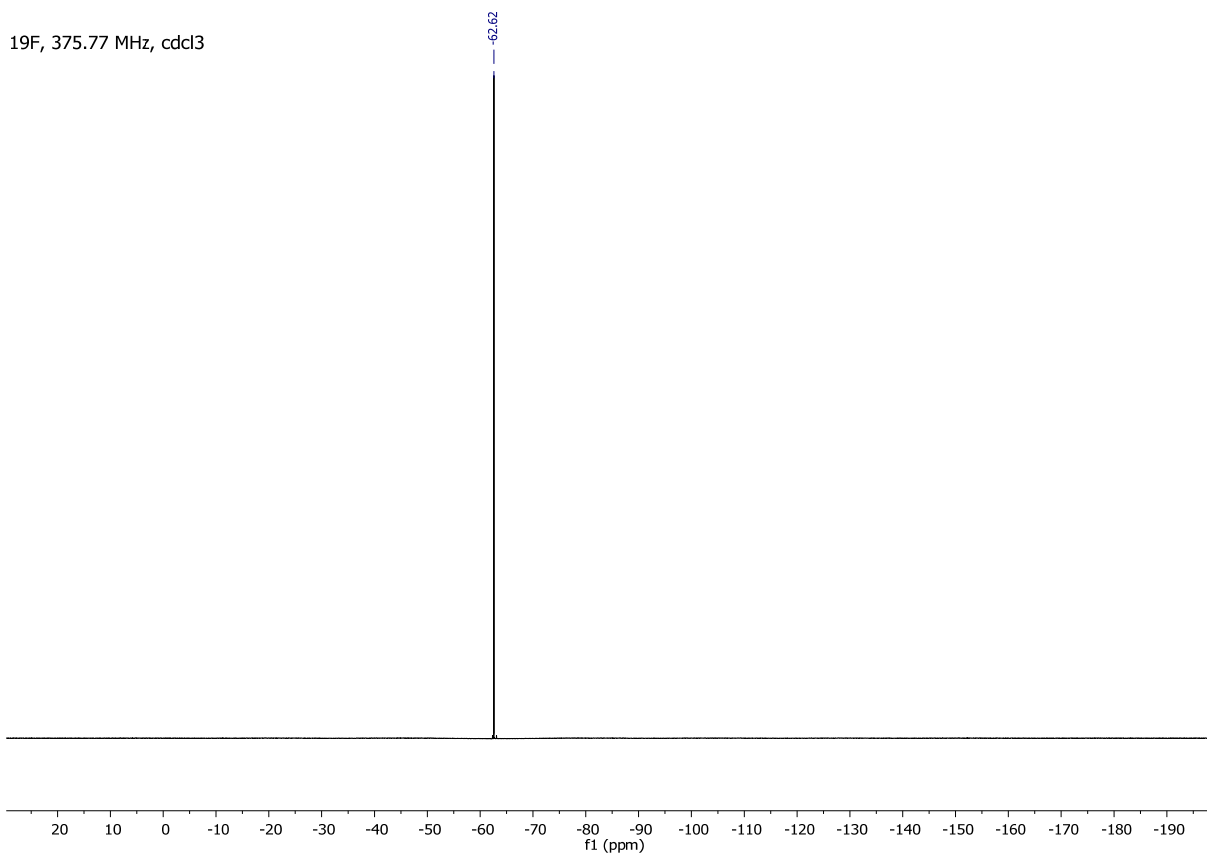

1H, 599.79 MHz, cdcl3

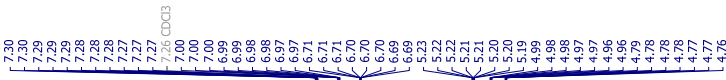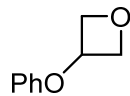

**1i**

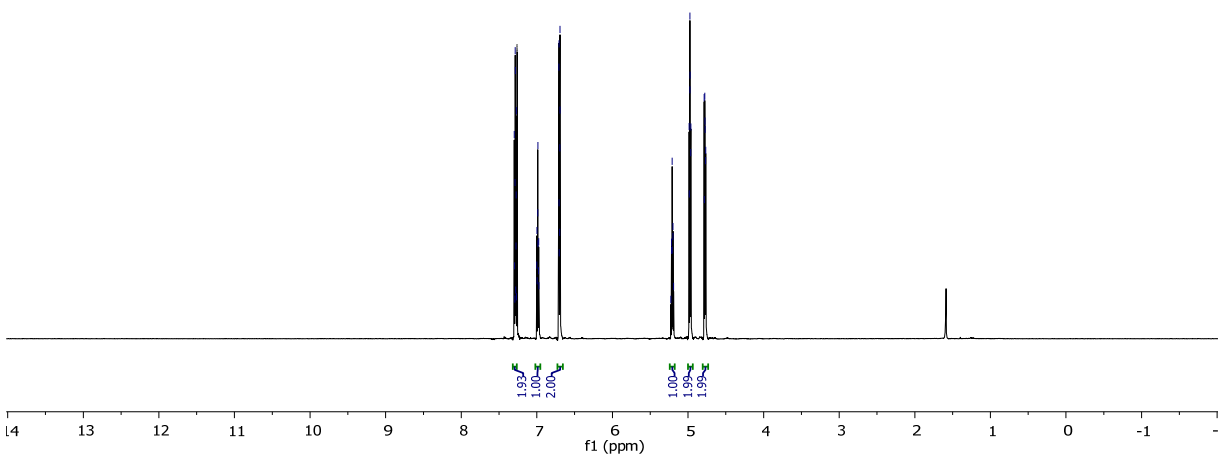

13C, 125.71 MHz, cdcl3

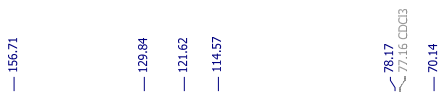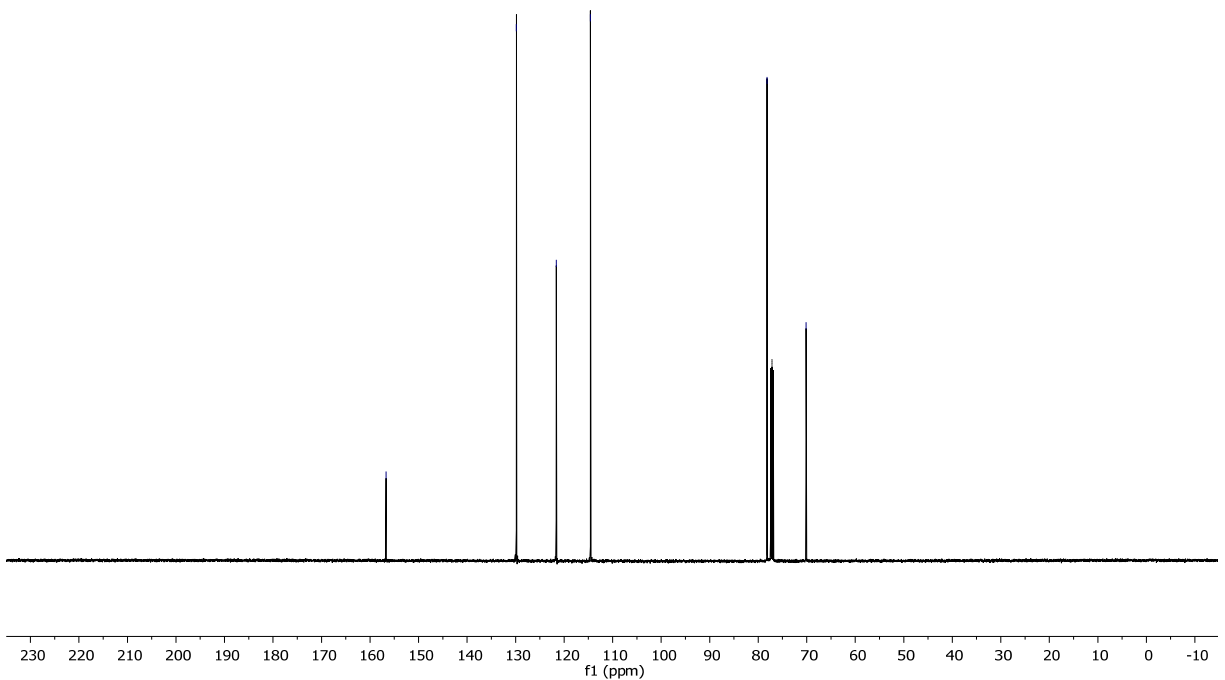



1H, 599.79 MHz, cdcl3

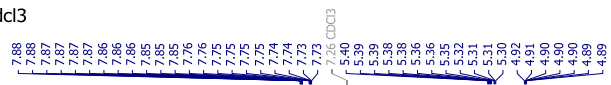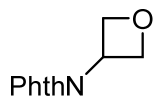

**1k**

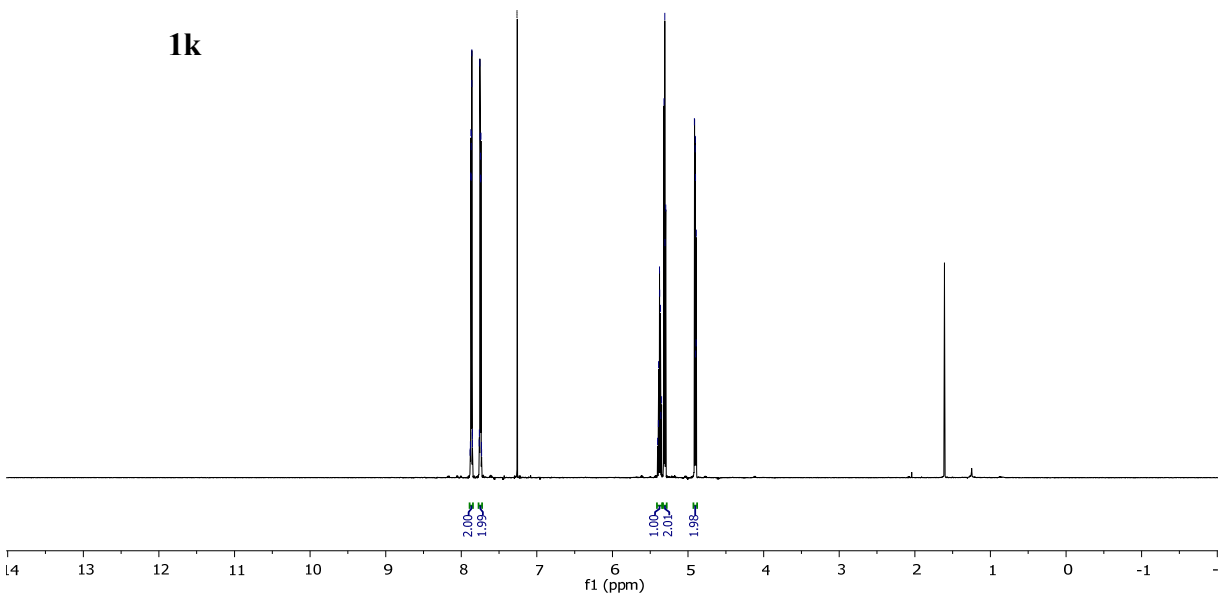

13C, 125.78 MHz, cdcl3

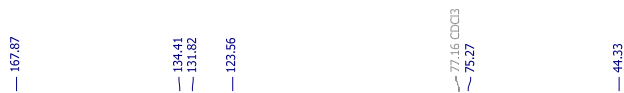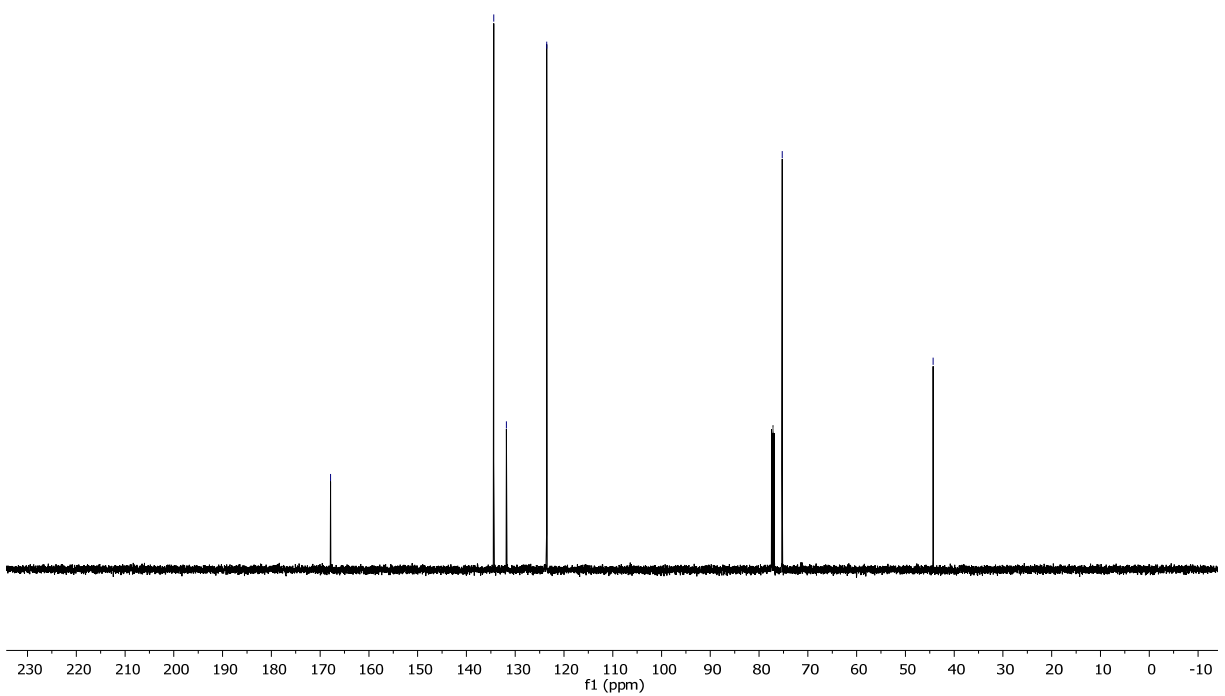

1H, 599.79 MHz, cdcl3

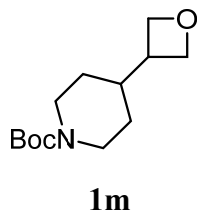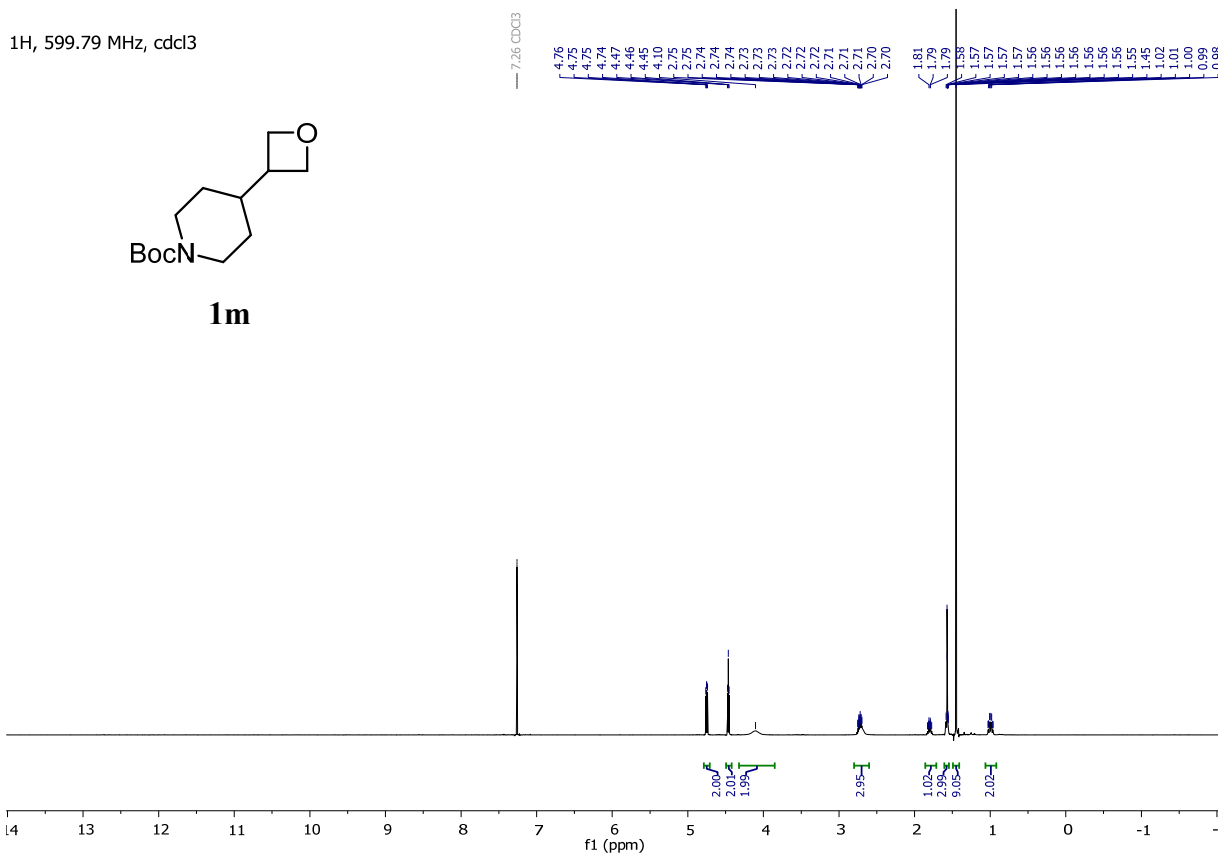

13C, 125.78 MHz, cdcl3

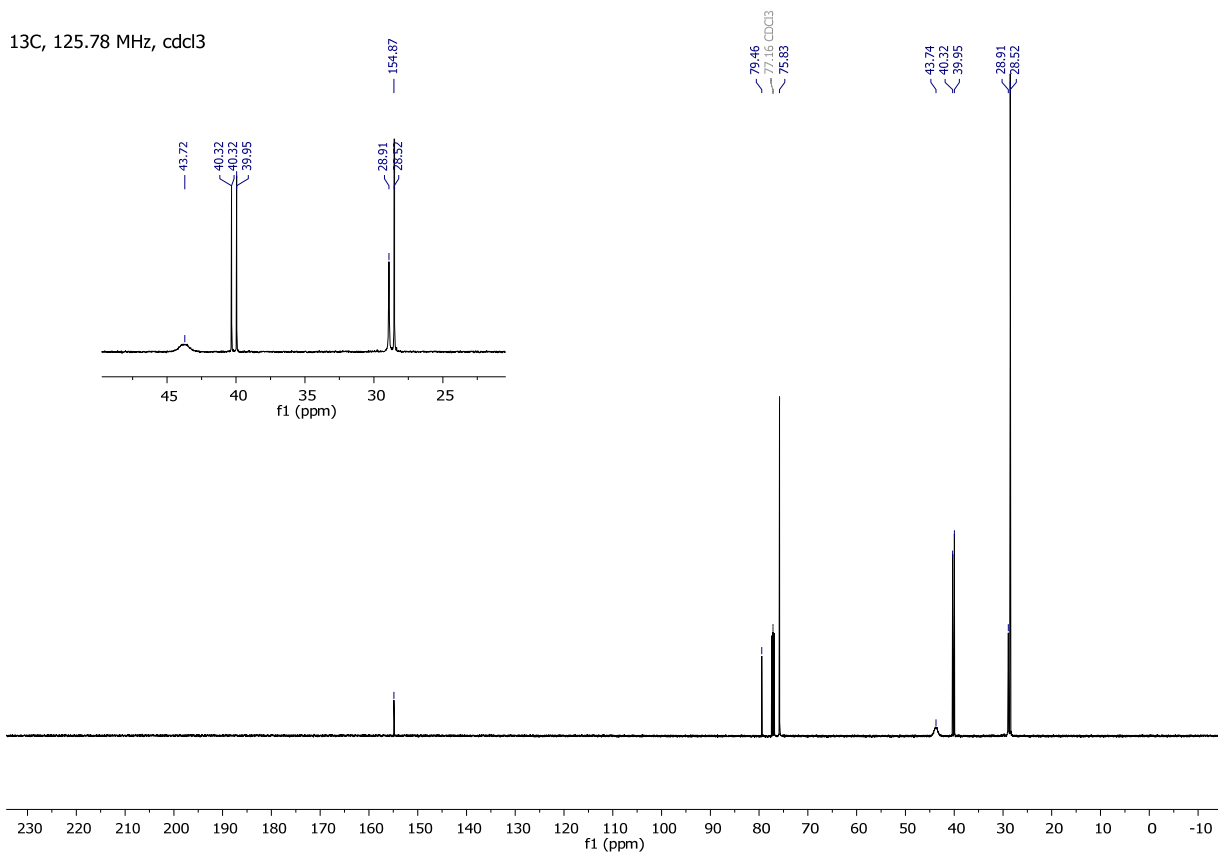

<sup>1</sup>H, 599.79 MHz, cdcl<sub>3</sub>

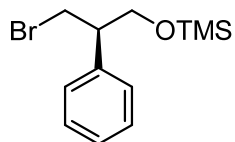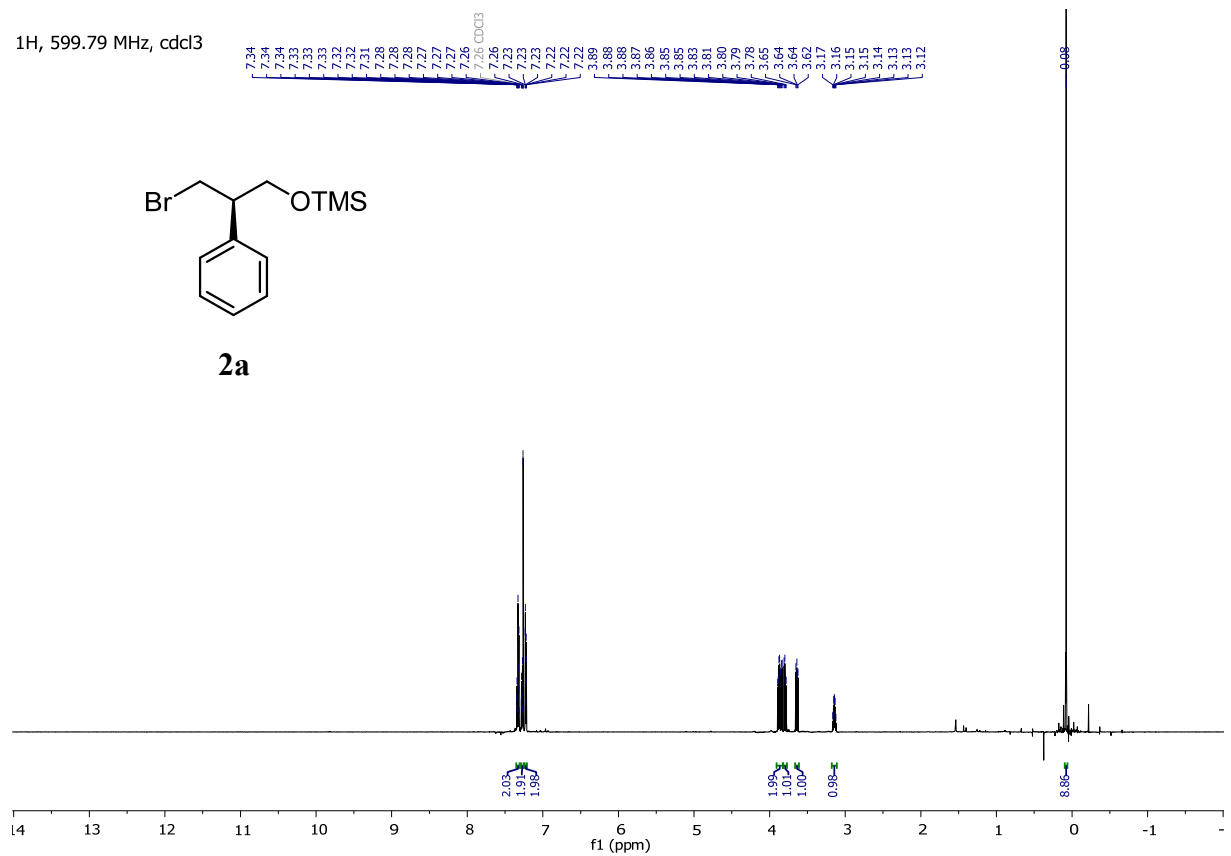

<sup>13</sup>C, 125.71 MHz, cdcl<sub>3</sub>

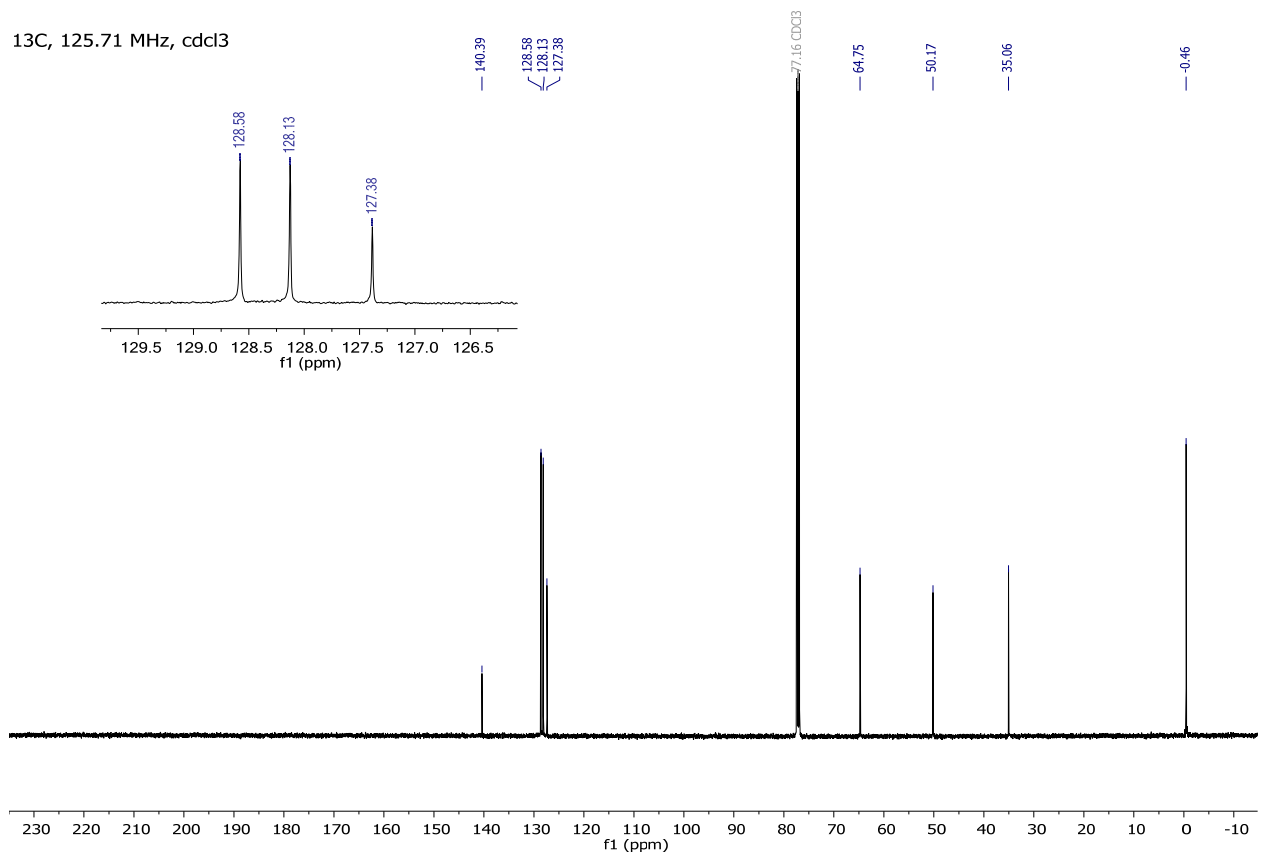

<sup>1</sup>H, 599.79 MHz, cdcl<sub>3</sub>

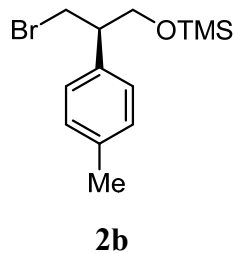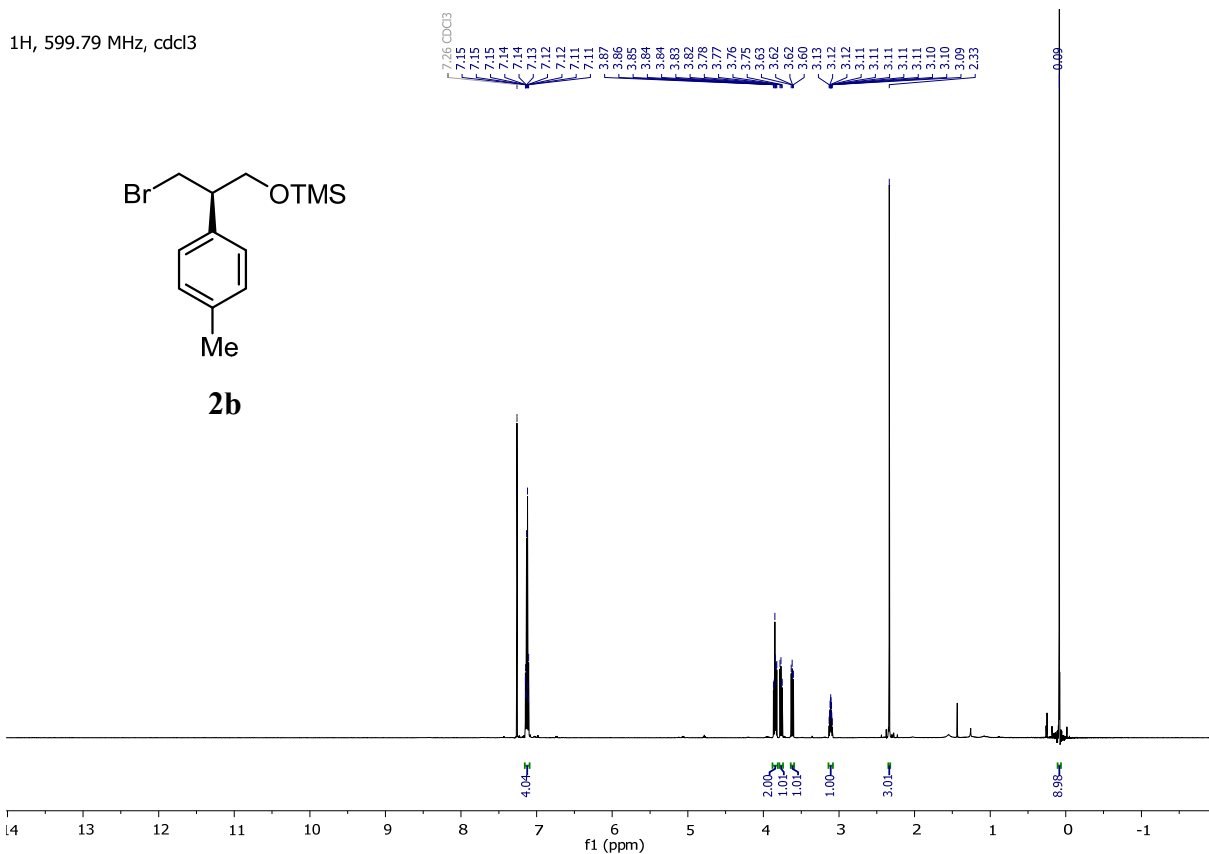

<sup>13</sup>C, 125.71 MHz, cdcl<sub>3</sub>

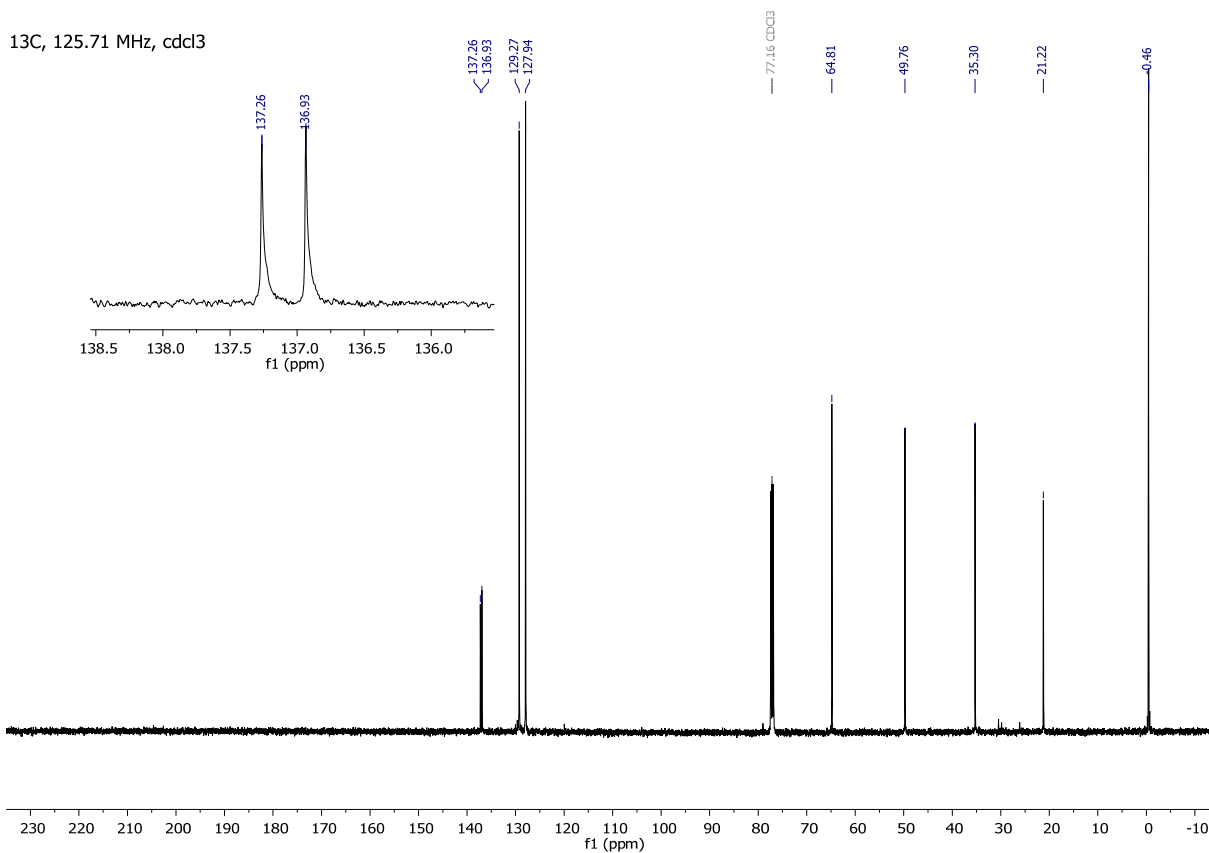



1H, 599.79 MHz, cdcl3

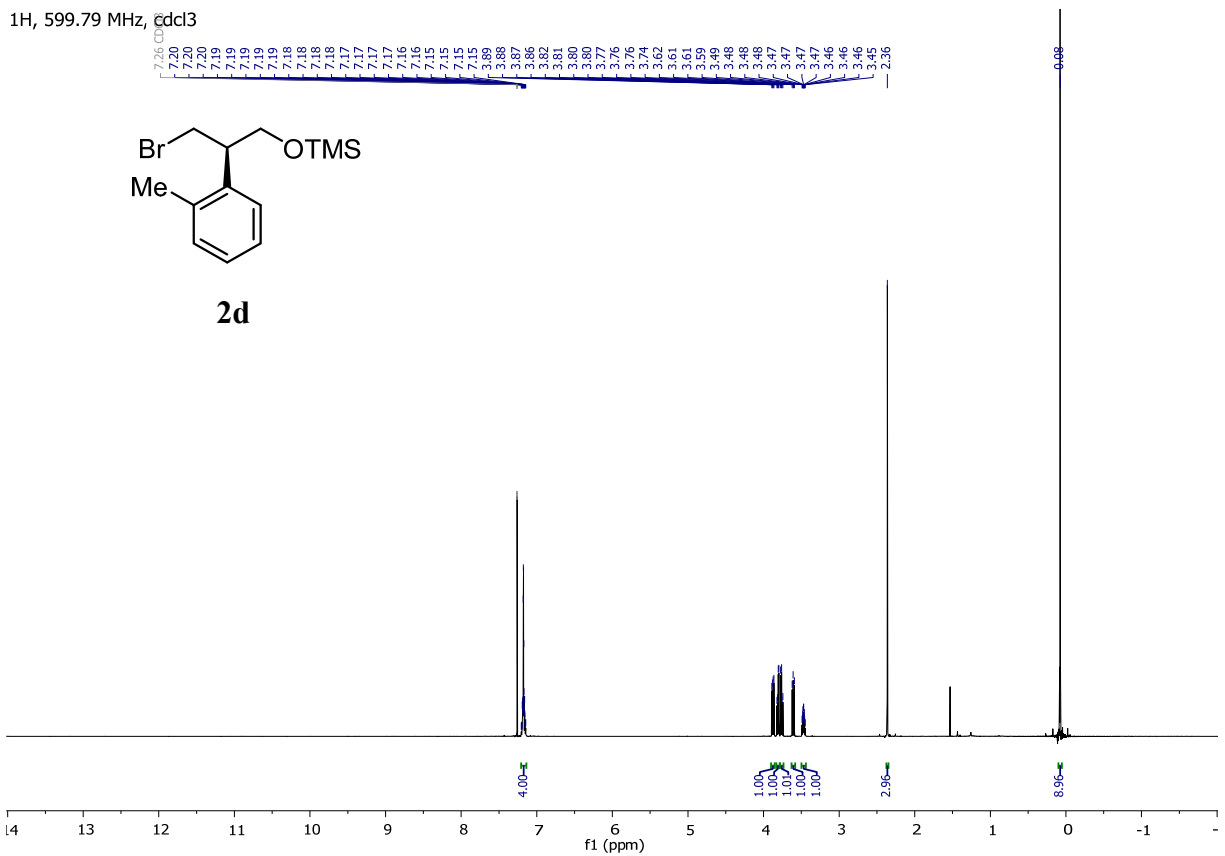

13C, 125.78 MHz, cdcl3

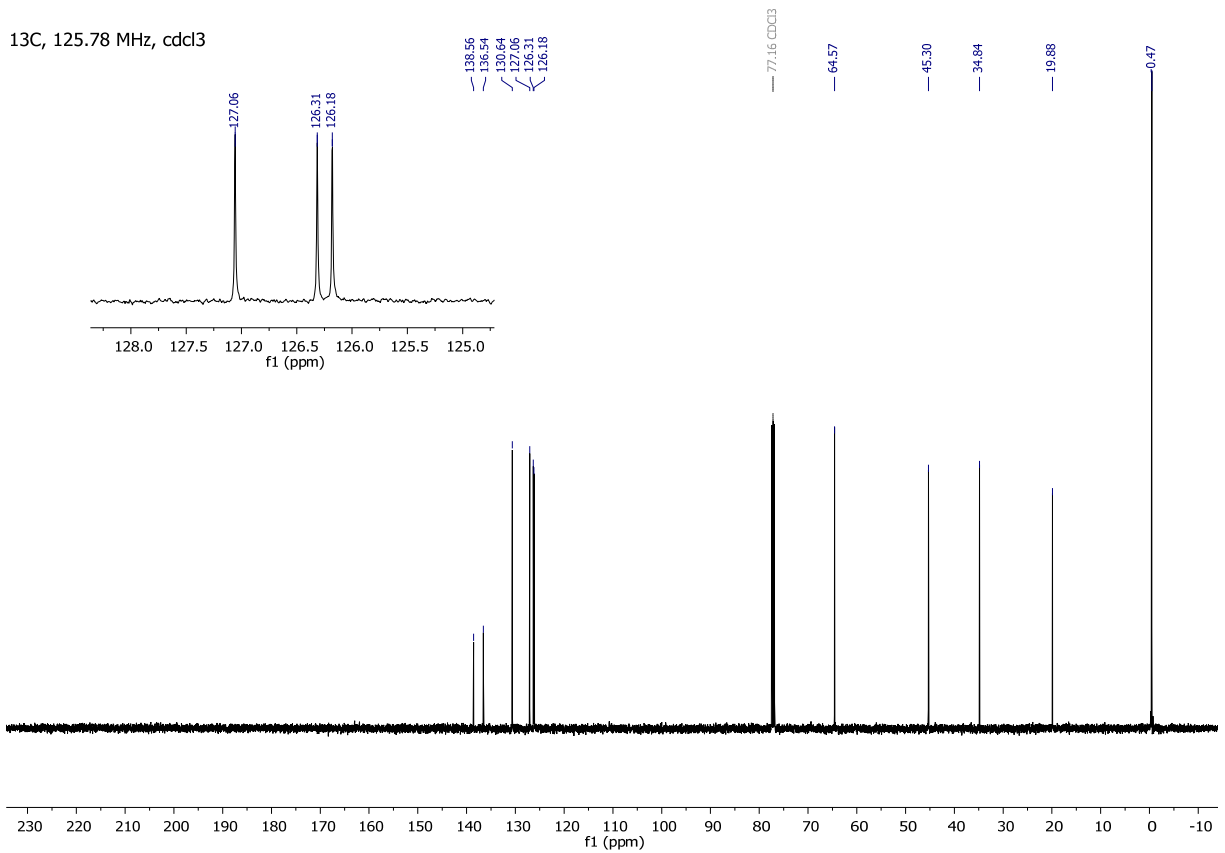

<sup>1</sup>H, 599.79 MHz, cdcl<sub>3</sub>

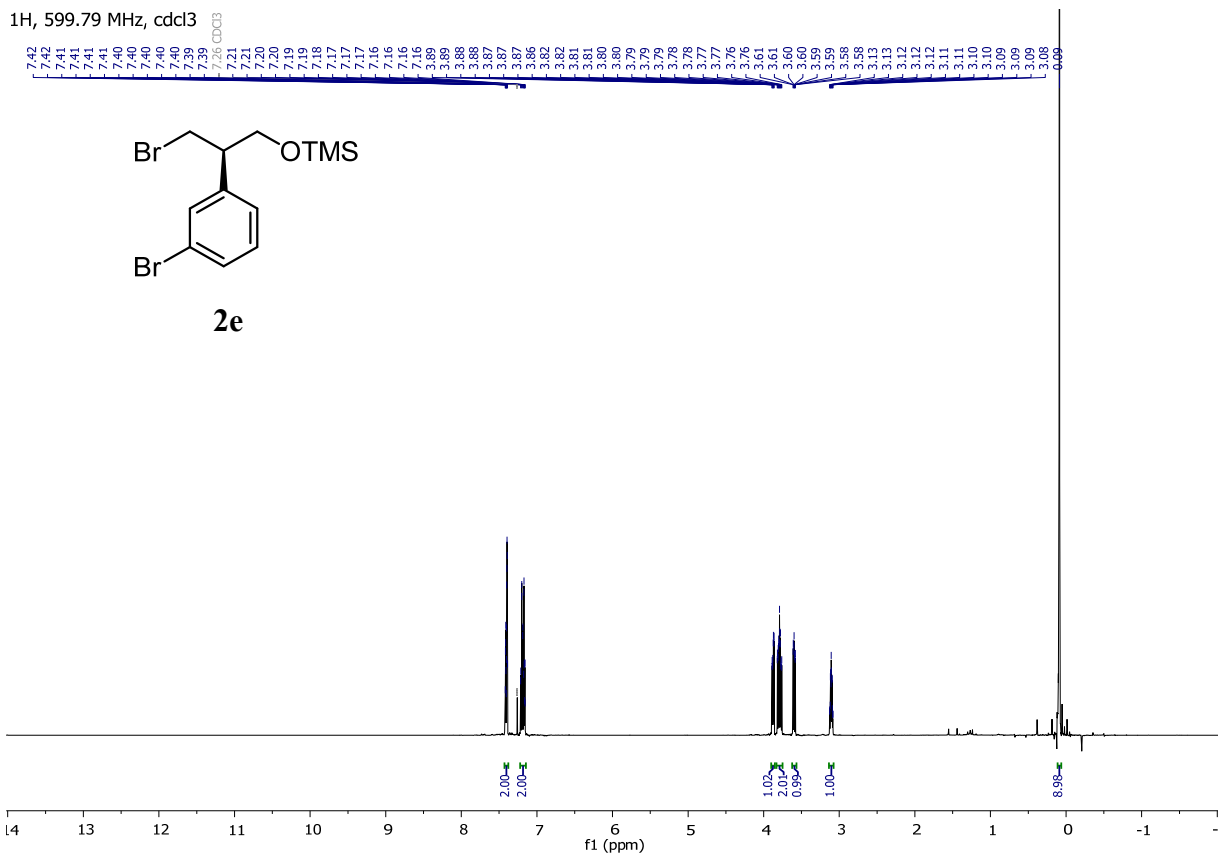

<sup>13</sup>C, 125.71 MHz, cdcl<sub>3</sub>

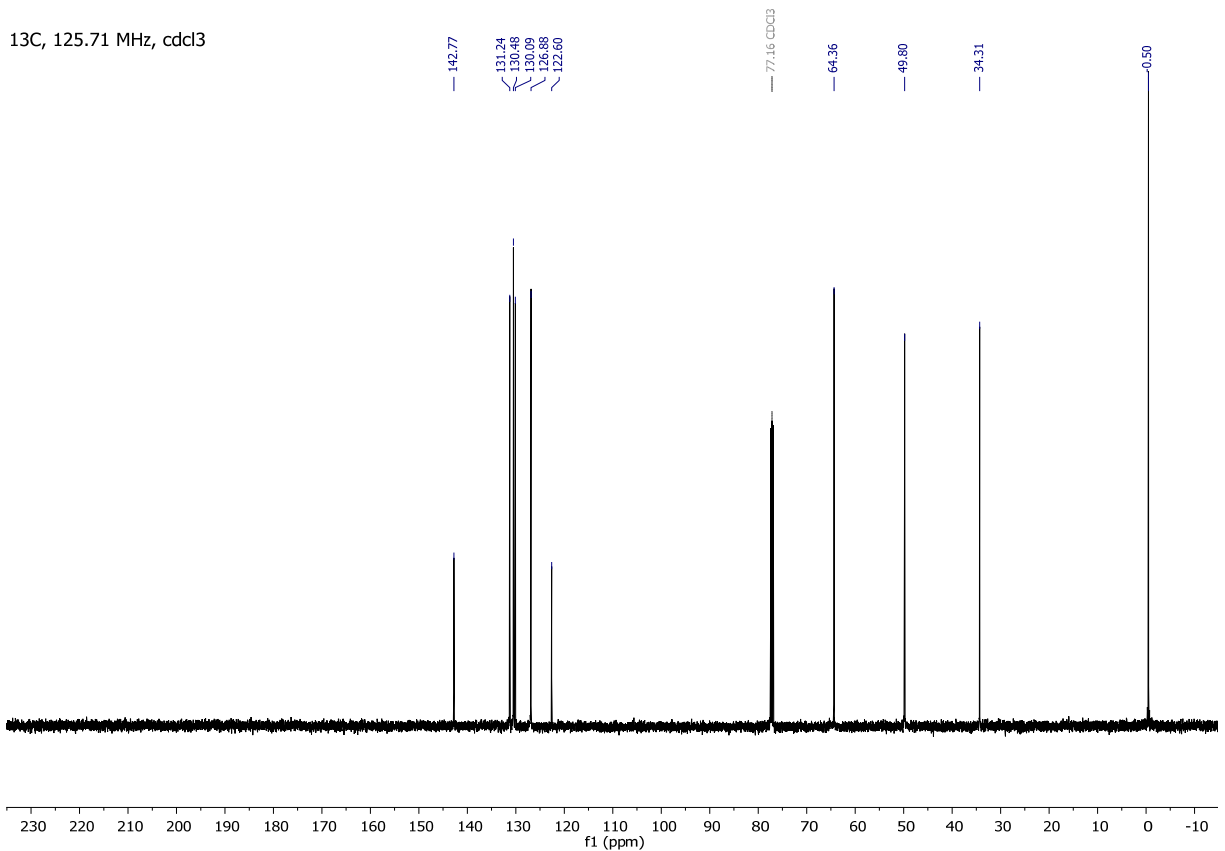

<sup>1</sup>H, 599.79 MHz, cdcl<sub>3</sub>

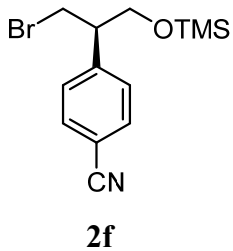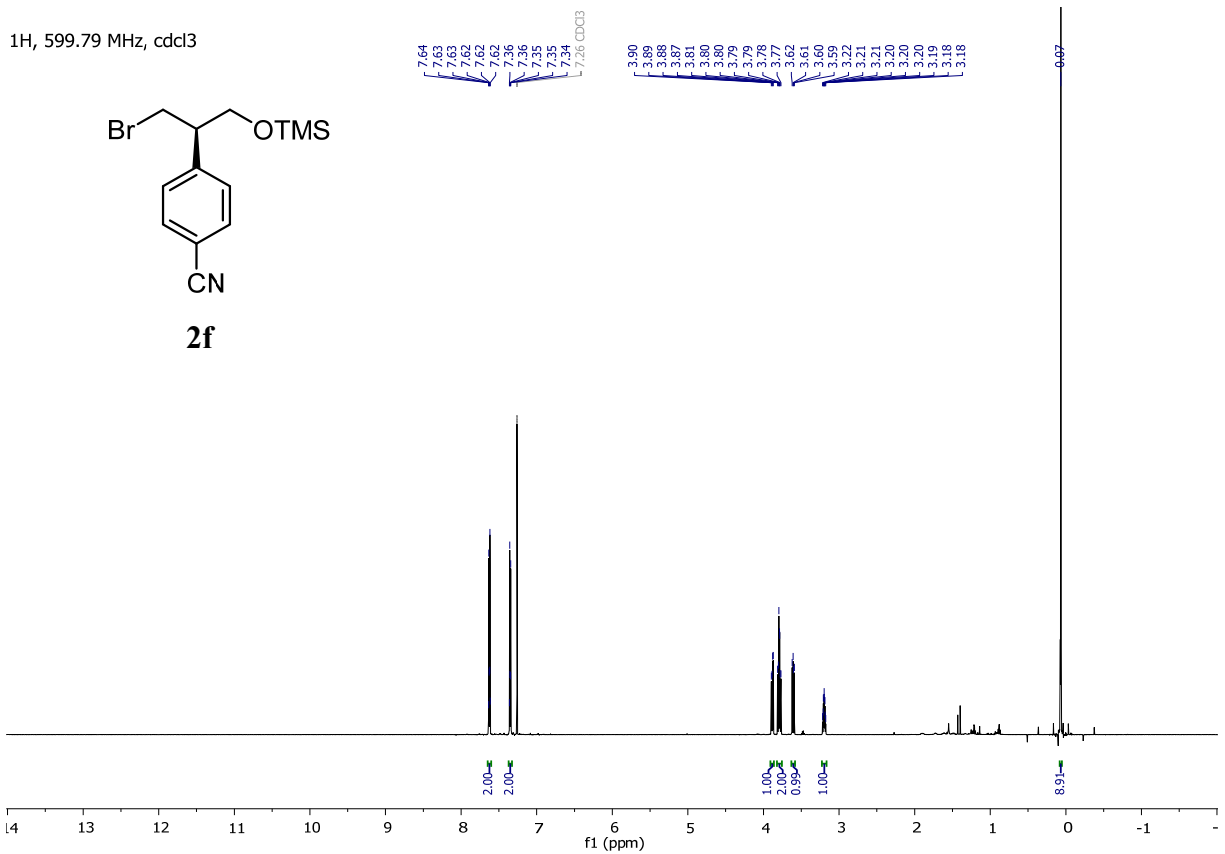

<sup>13</sup>C, 125.71 MHz, cdcl<sub>3</sub>

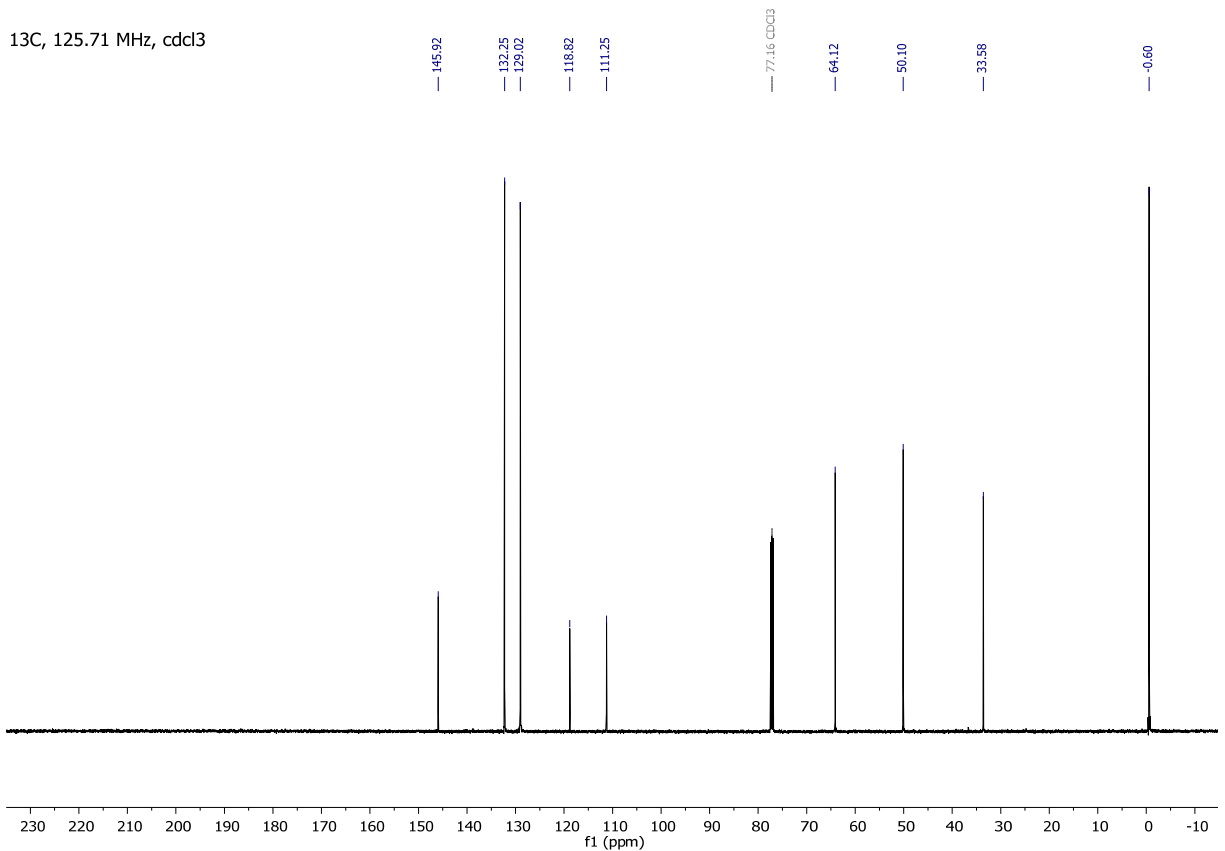



1H, 599.79 MHz, cdcl3

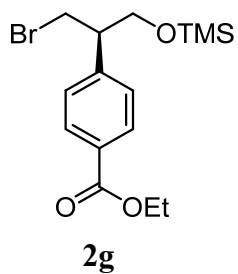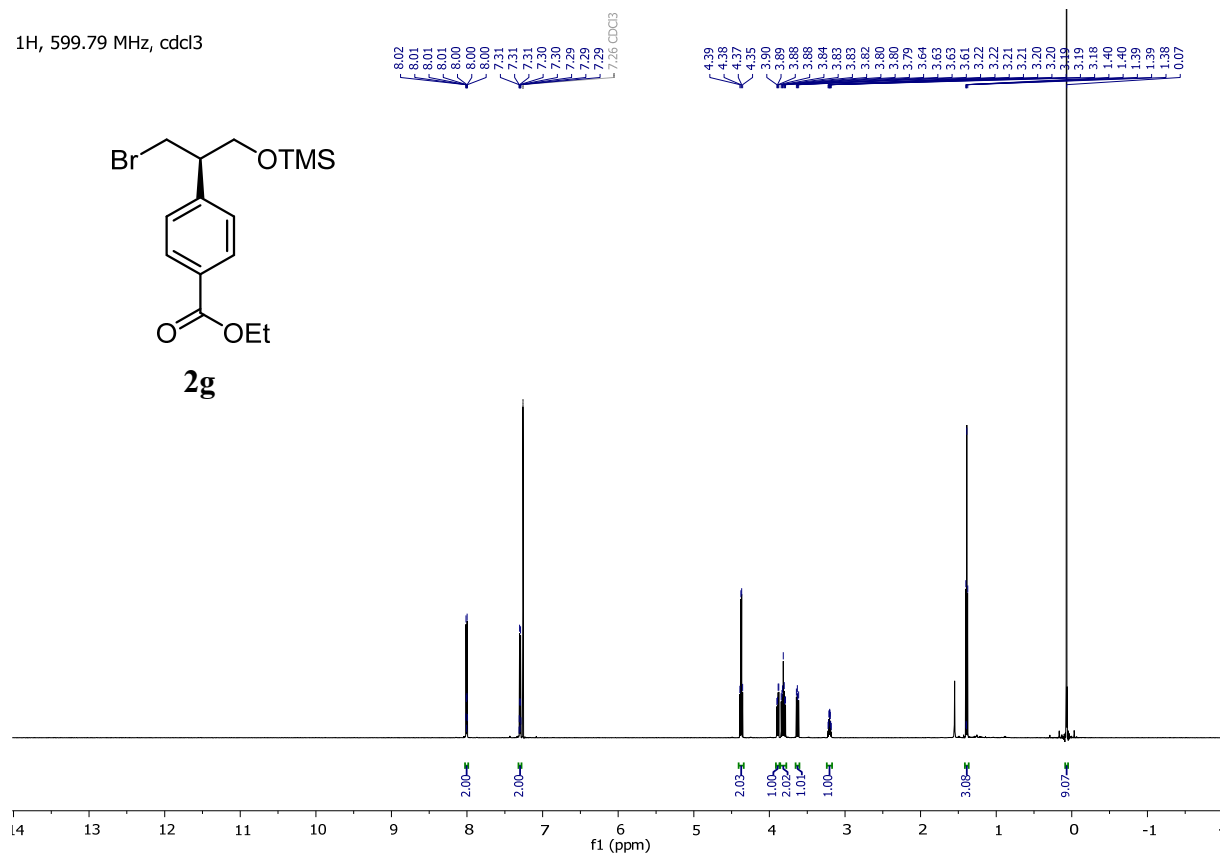

13C, 125.78 MHz, cdcl3

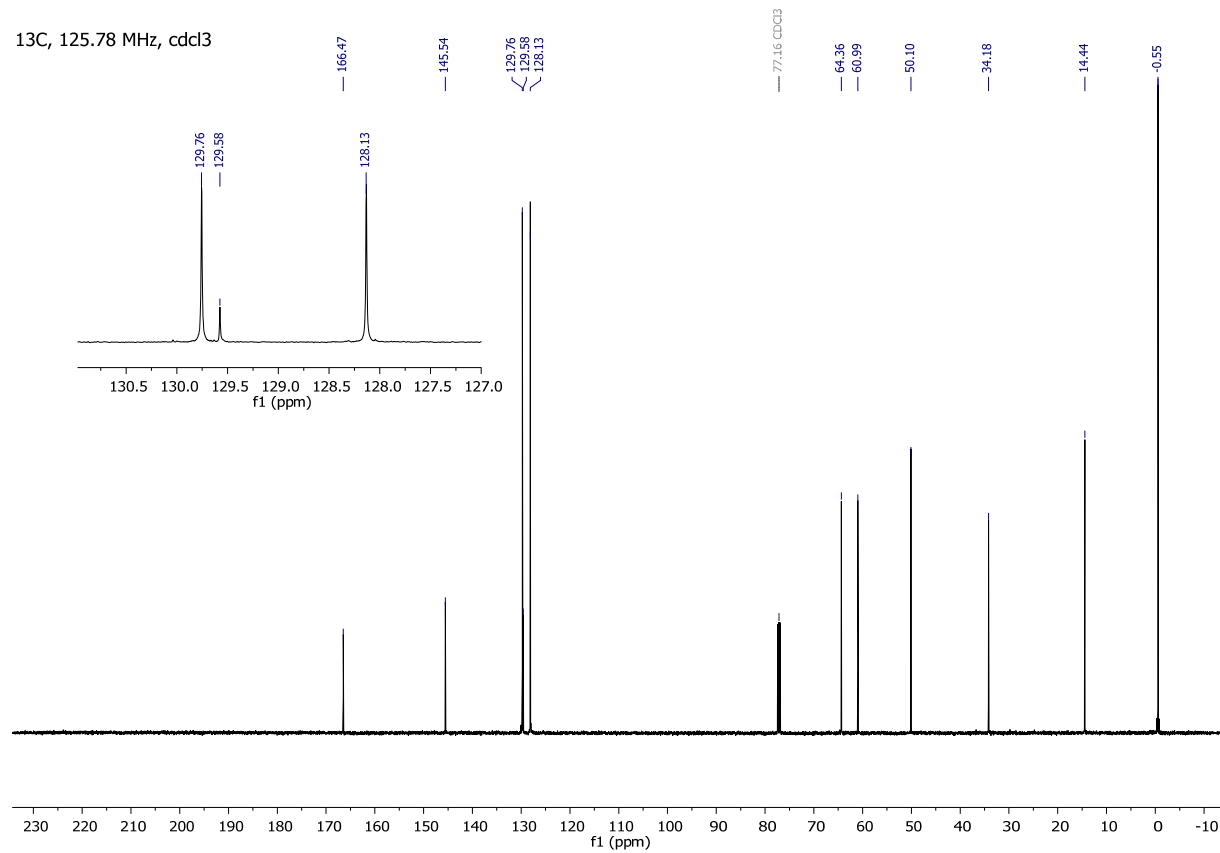

<sup>1</sup>H, 599.79 MHz, cdCl<sub>3</sub>

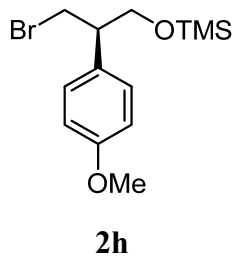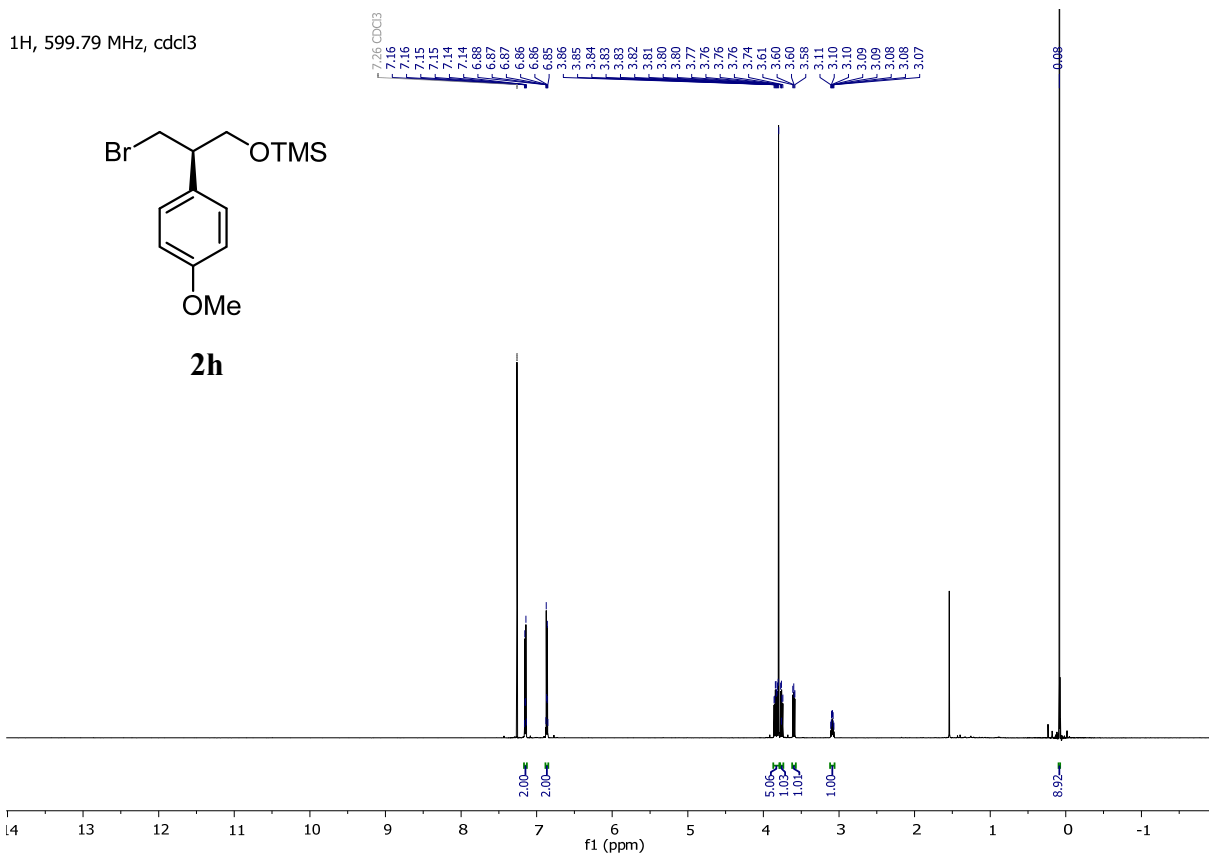

<sup>13</sup>C, 125.78 MHz, cdCl<sub>3</sub>

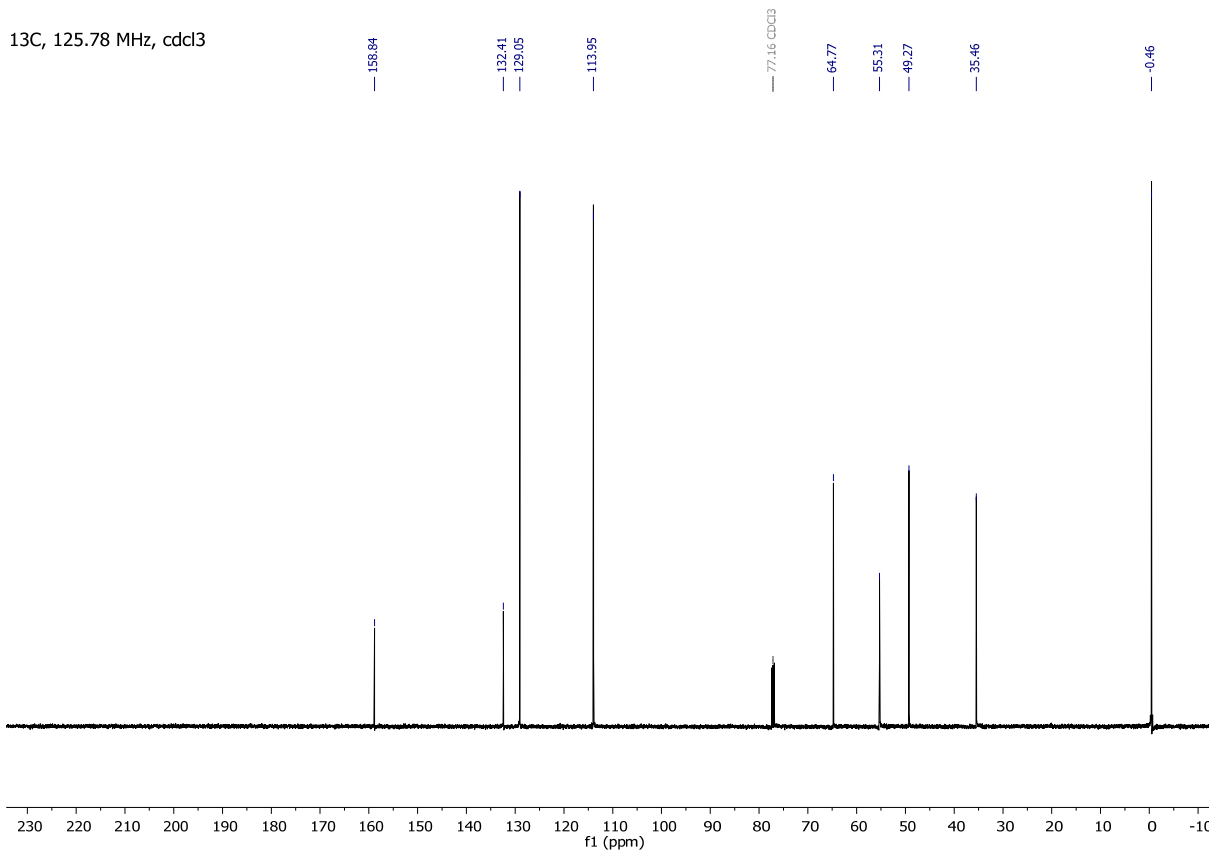

1H, 499.87 MHz, cdcl3

7.32  
7.31  
7.31  
7.30  
7.30  
7.29  
7.29  
7.28  
7.28  
7.27  
7.26 CDCl3  
7.01  
7.01  
7.00  
7.00  
6.99  
6.99  
6.99  
6.98  
6.98  
6.97  
6.97  
6.96  
6.96  
6.95  
6.95  
6.95  
4.48  
4.47  
4.47  
4.46  
4.46  
4.45  
4.45  
4.44  
3.92  
3.91  
3.89  
3.88  
3.87  
3.86  
3.85  
3.84  
3.67  
3.66  
3.64  
3.58  
3.58  
3.55  
3.55

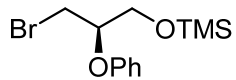

**2i**

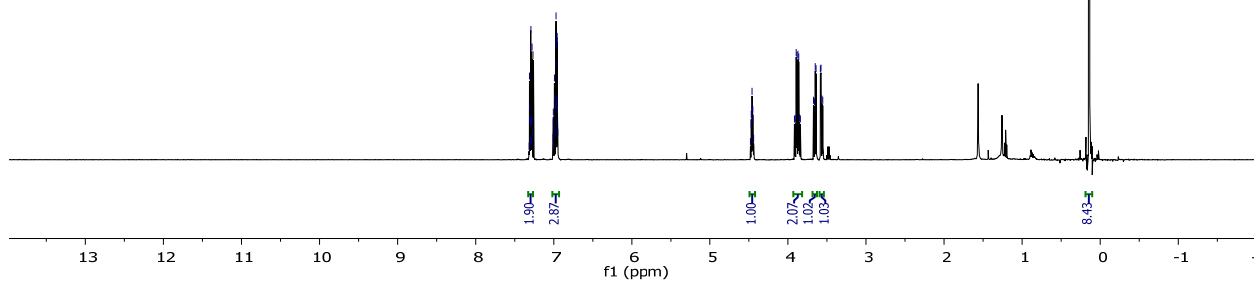

13C, 125.71 MHz, cdcl3

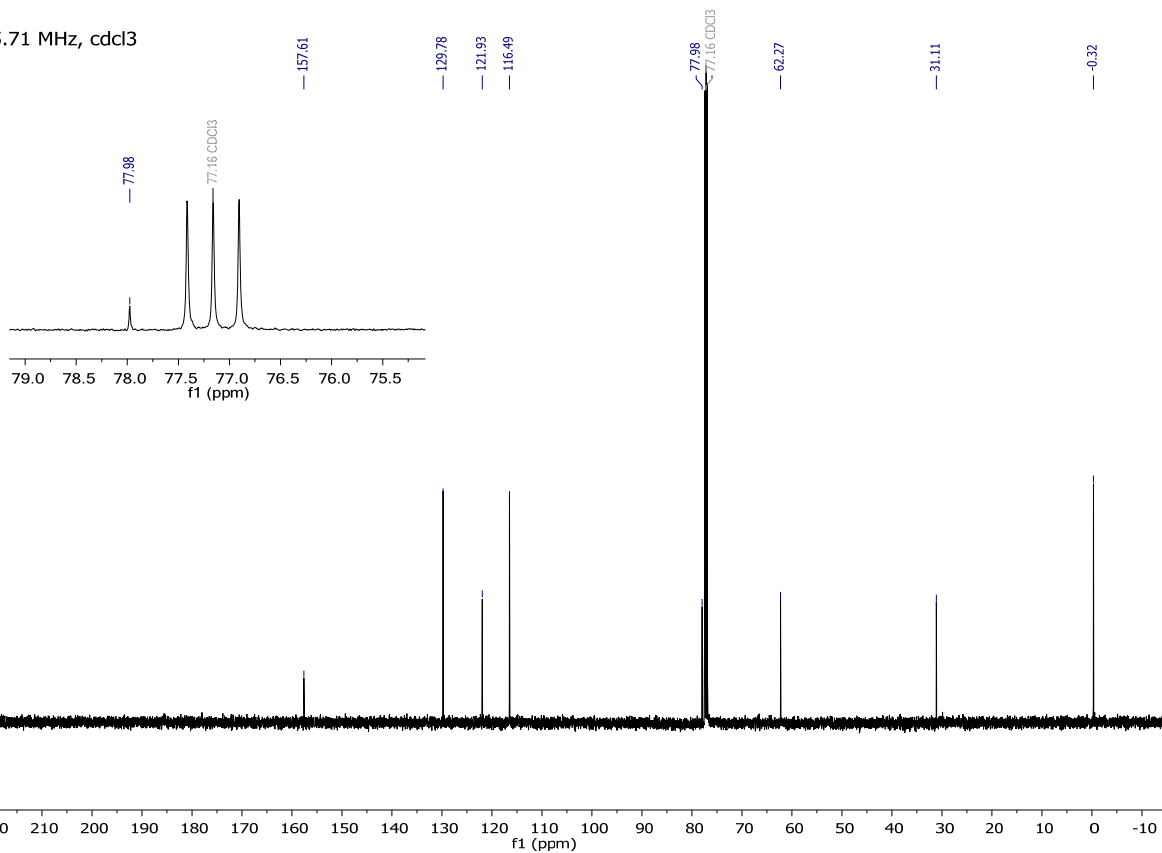

<sup>1</sup>H, 599.79 MHz, cdcl<sub>3</sub>

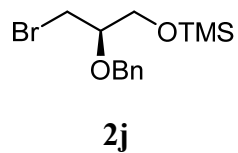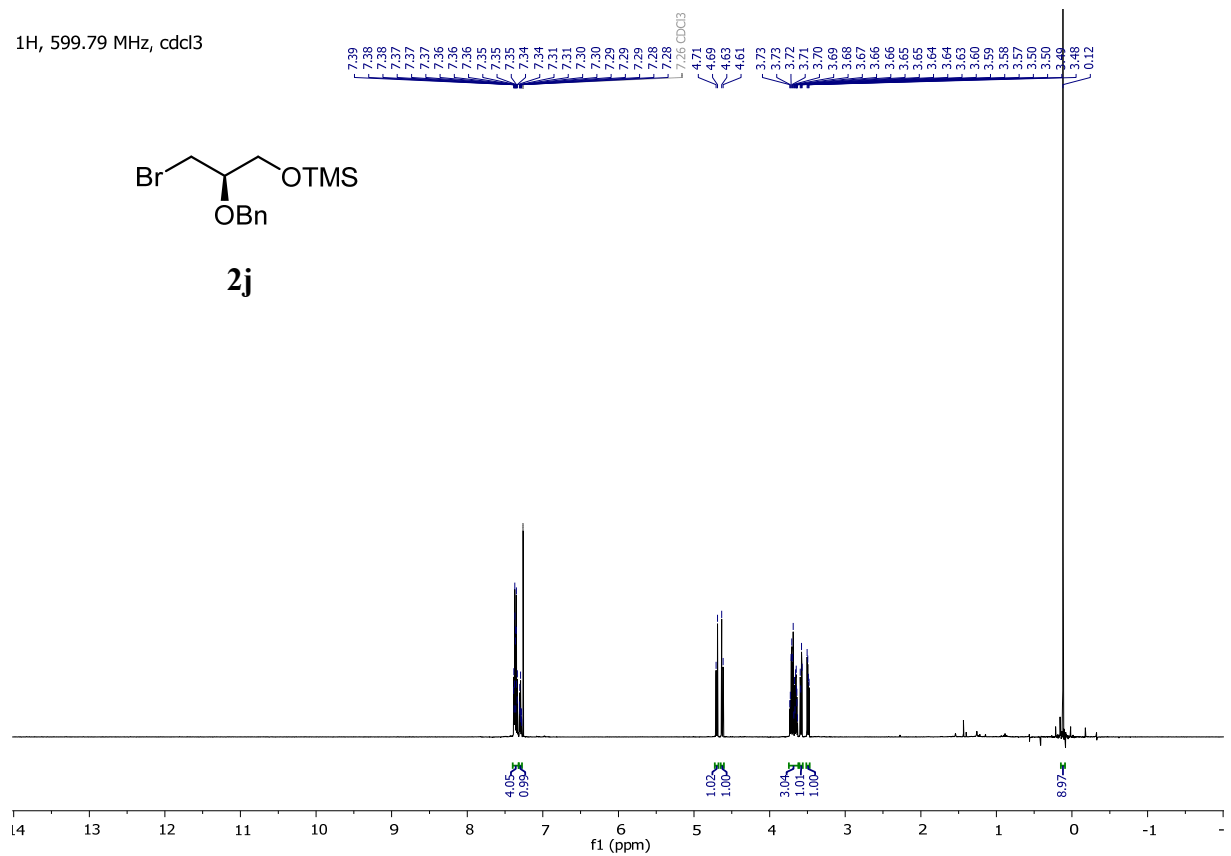

<sup>13</sup>C, 125.71 MHz, cdcl<sub>3</sub>

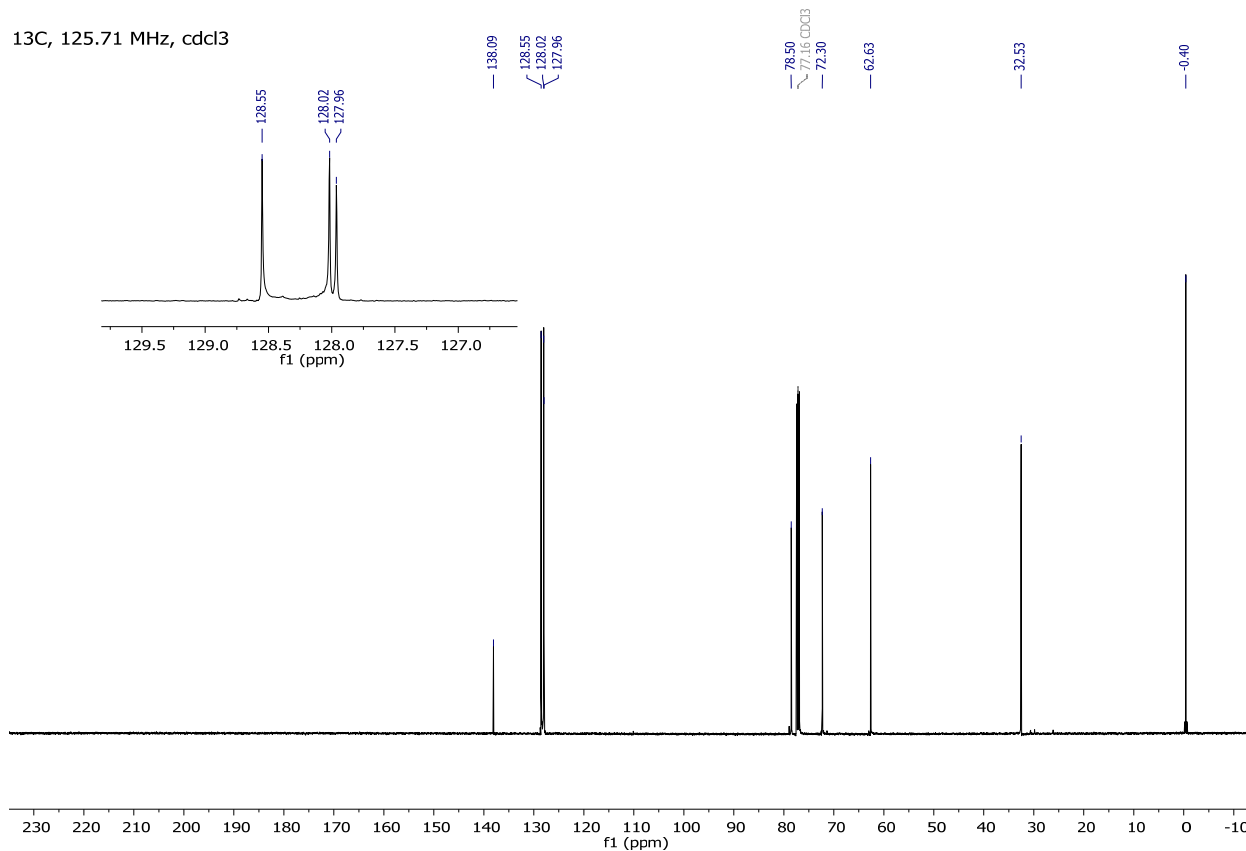

<sup>1</sup>H, 599.79 MHz, cdcl<sub>3</sub>

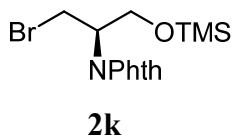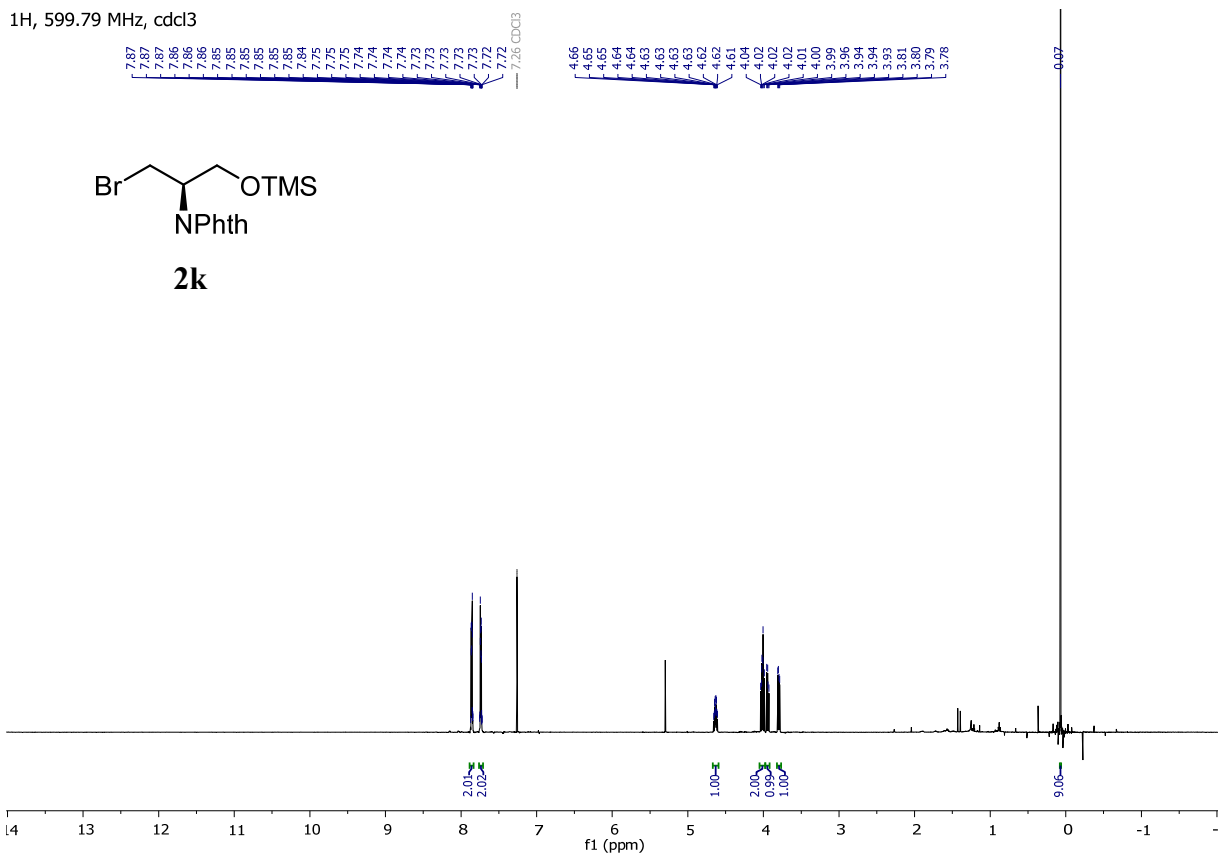

<sup>13</sup>C, 125.71 MHz, cdcl<sub>3</sub>

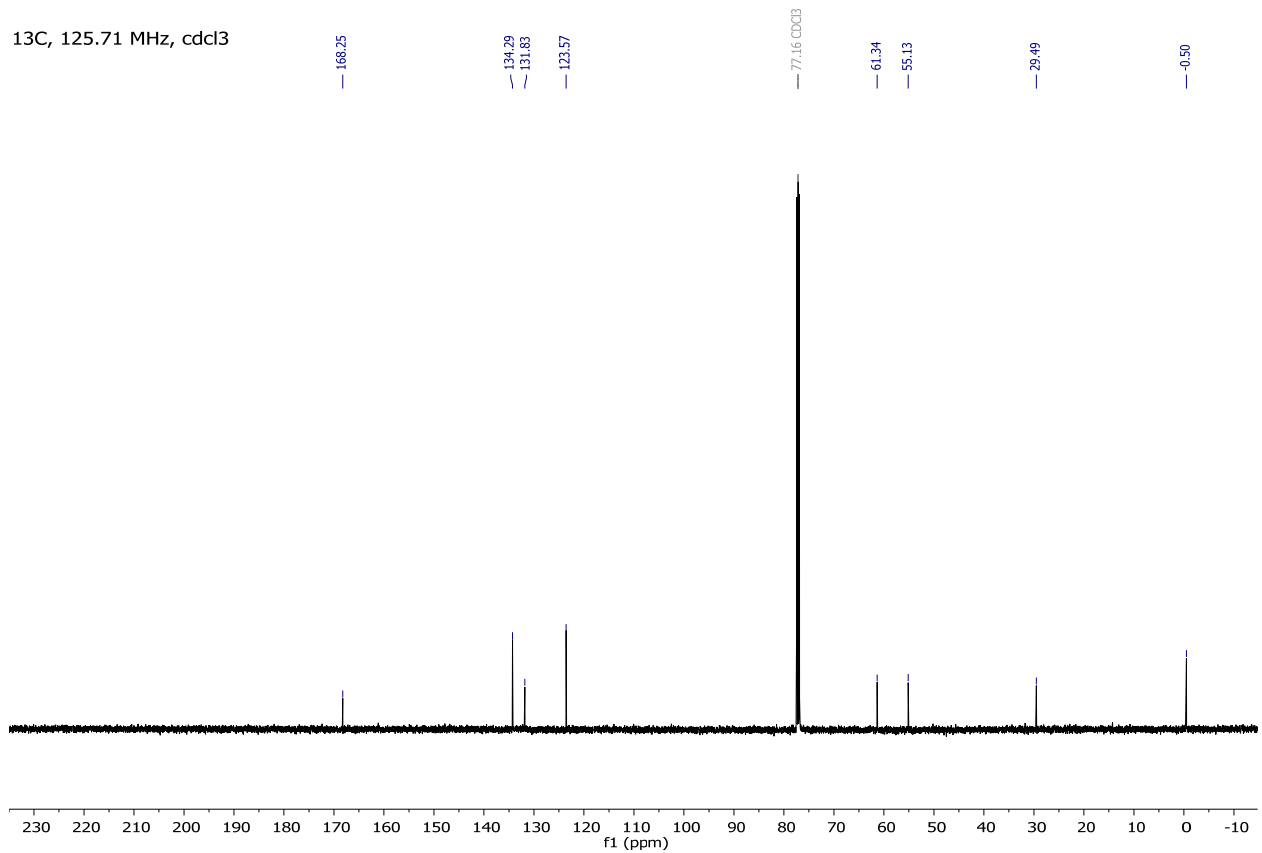

1H, 599.79 MHz, cdcl3

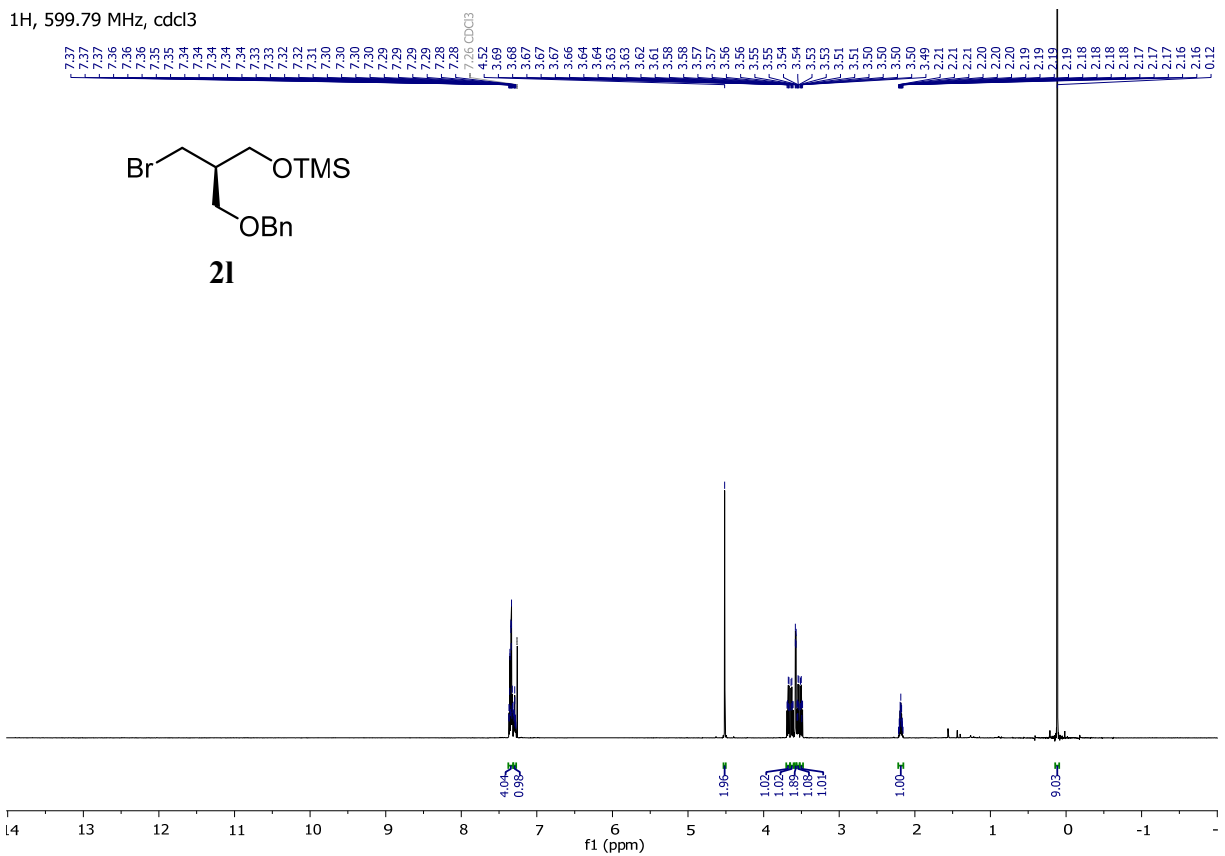

13C, 125.78 MHz, cdcl3

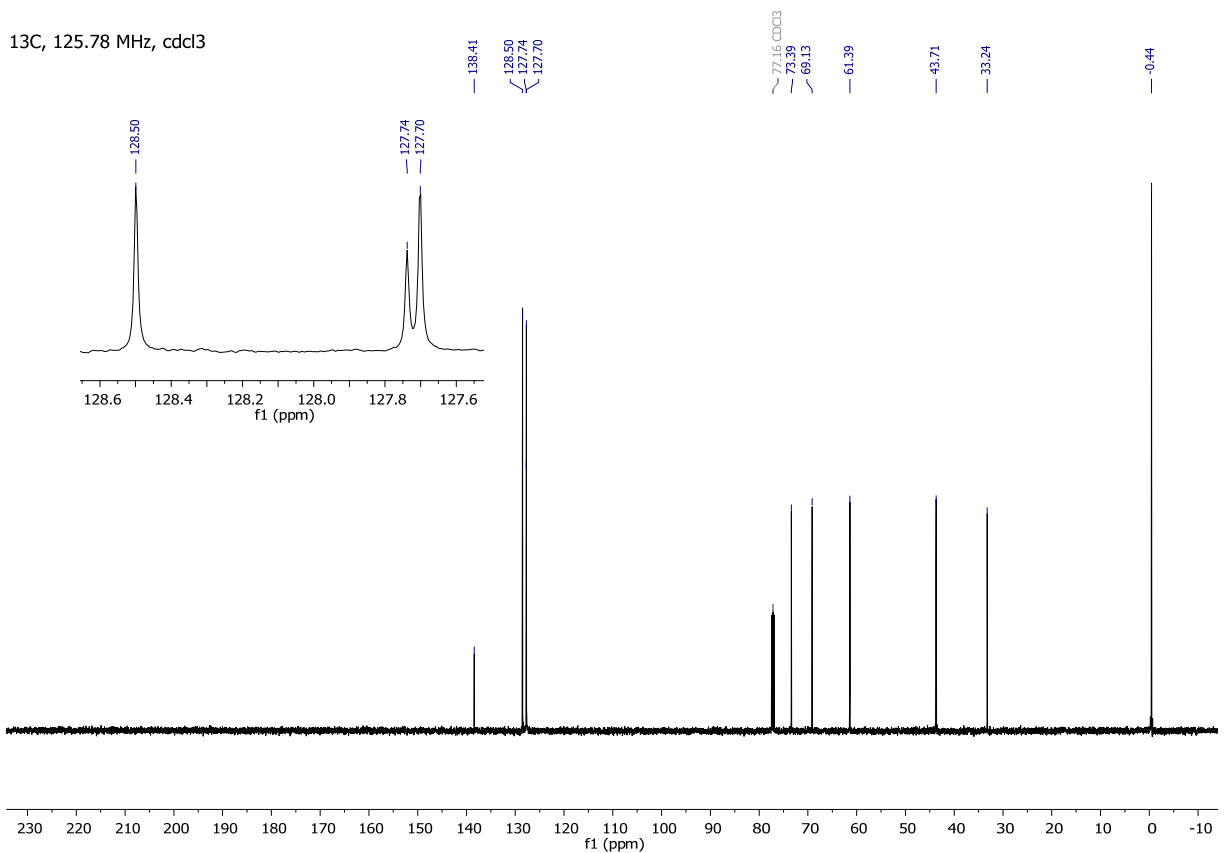

1H, 599.79 MHz, cdcl3

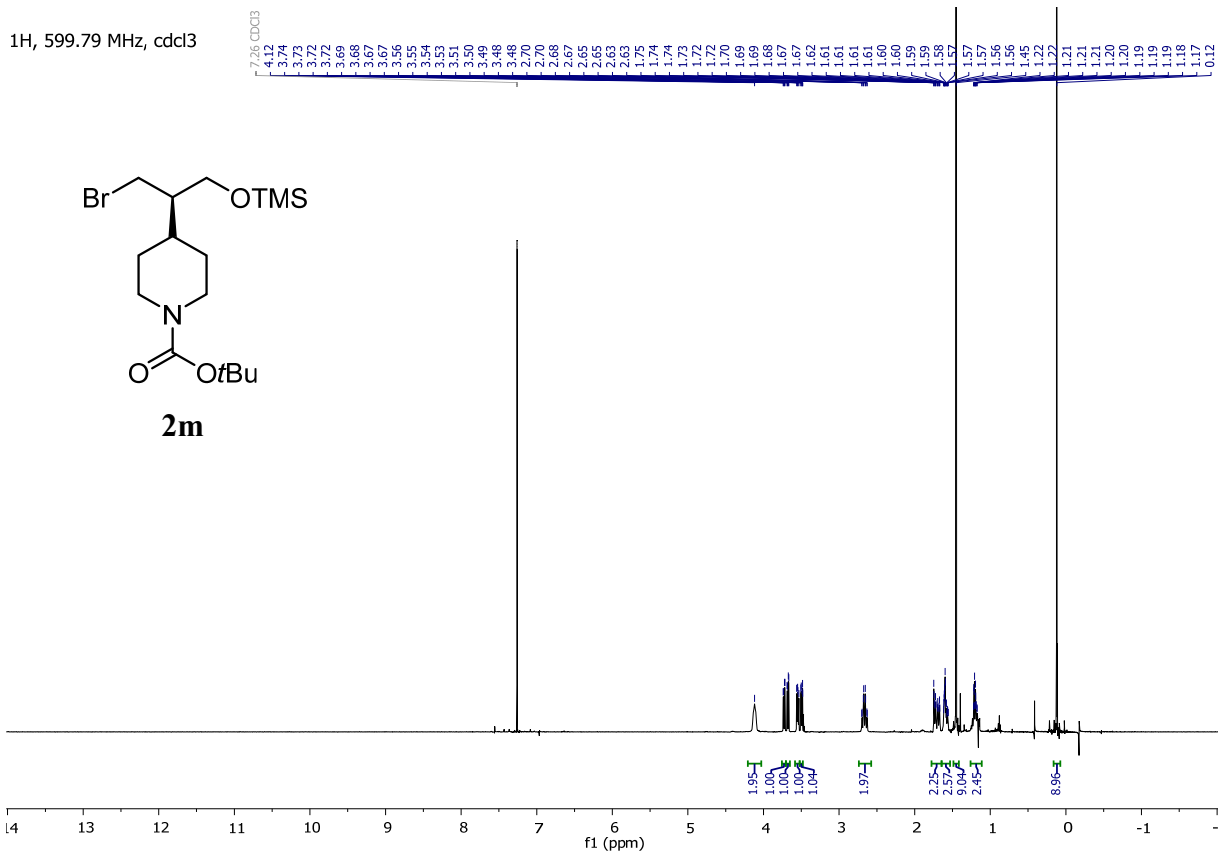

13C, 125.78 MHz, cdcl3

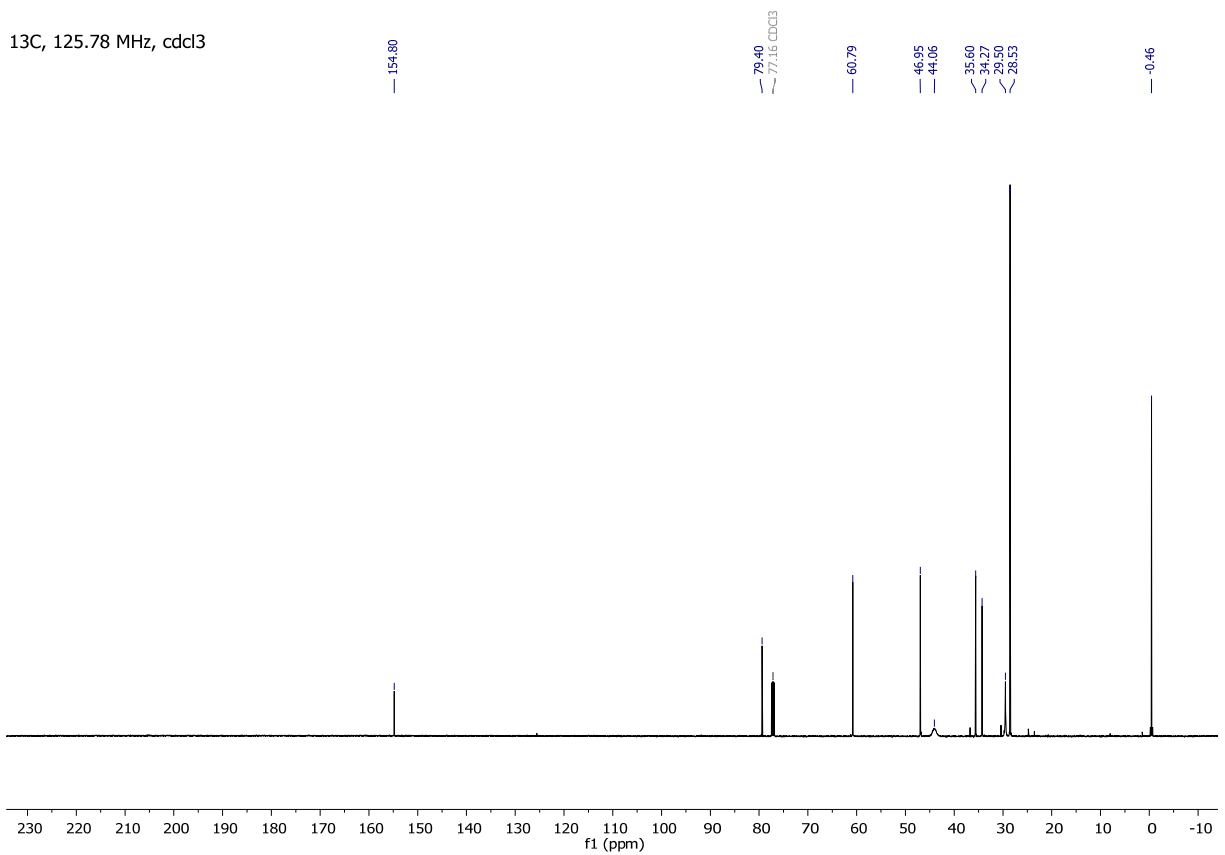

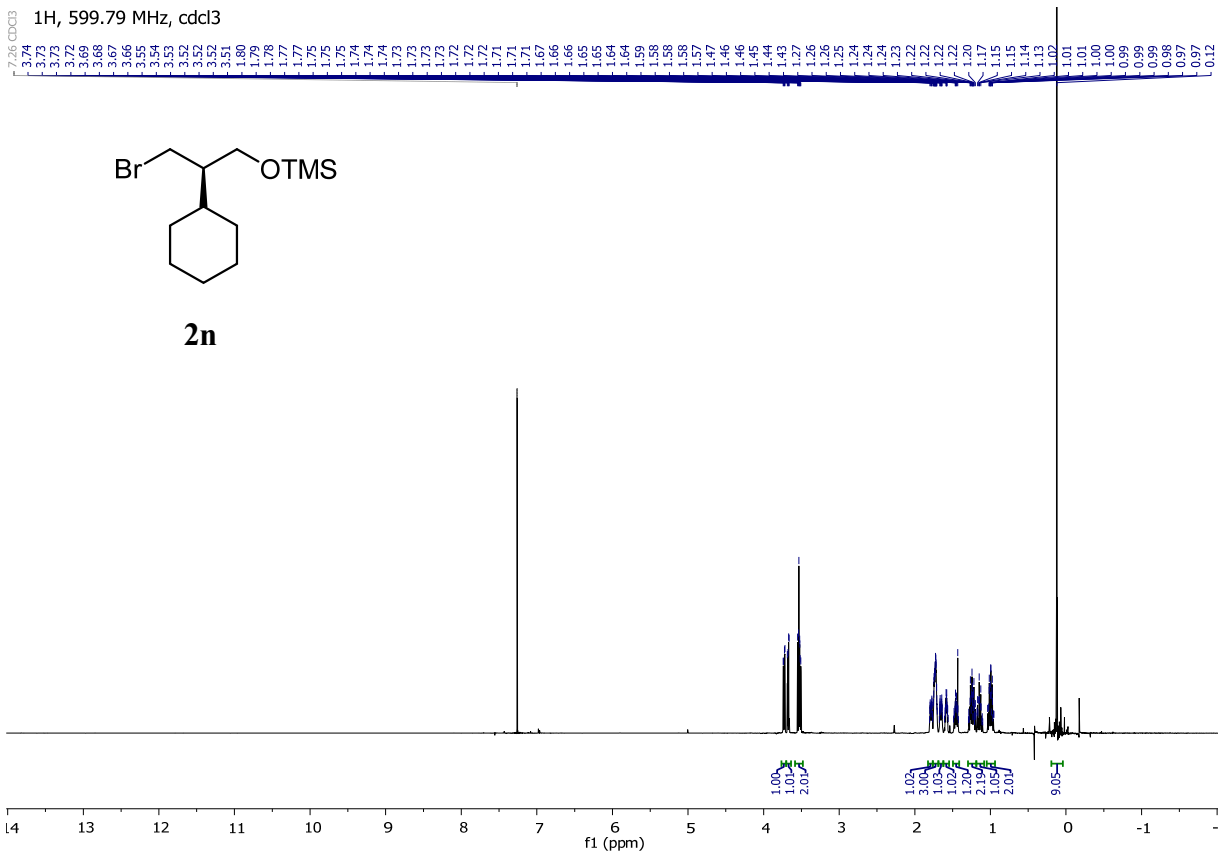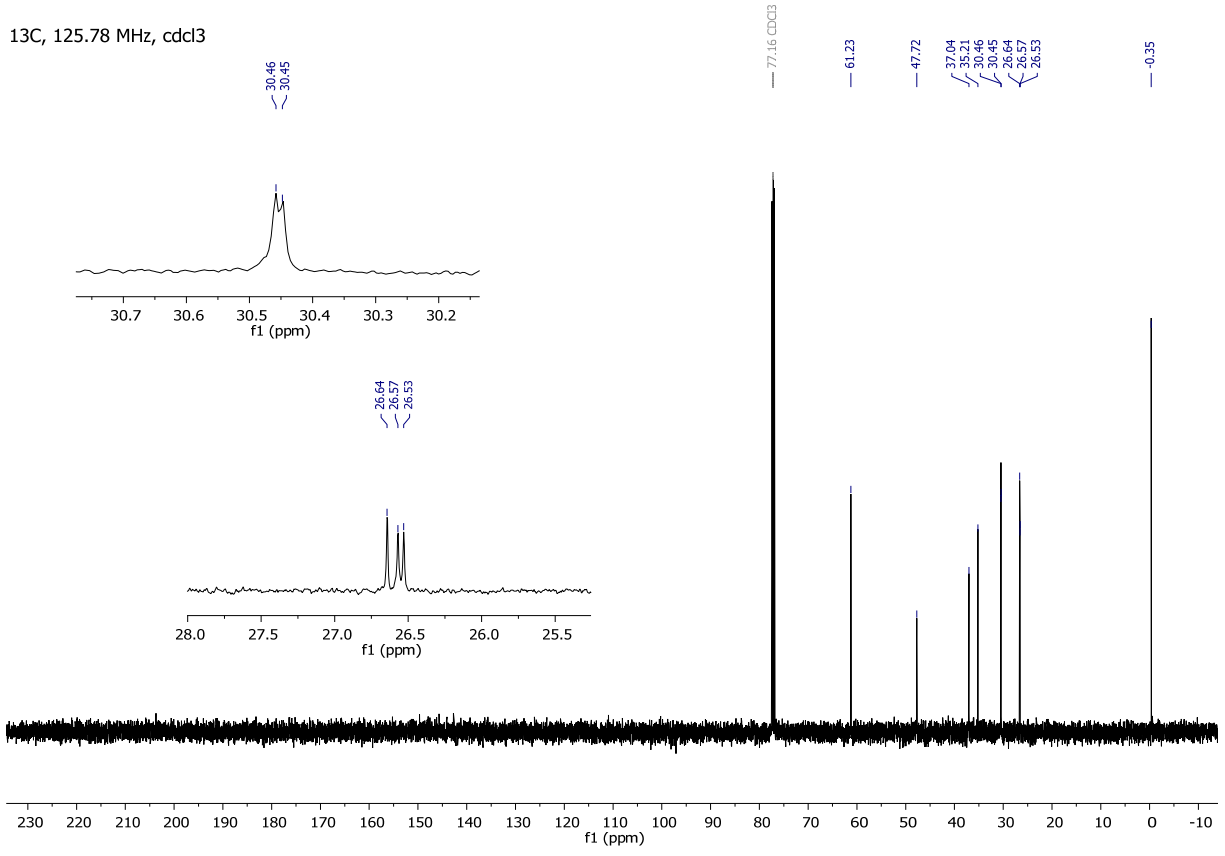





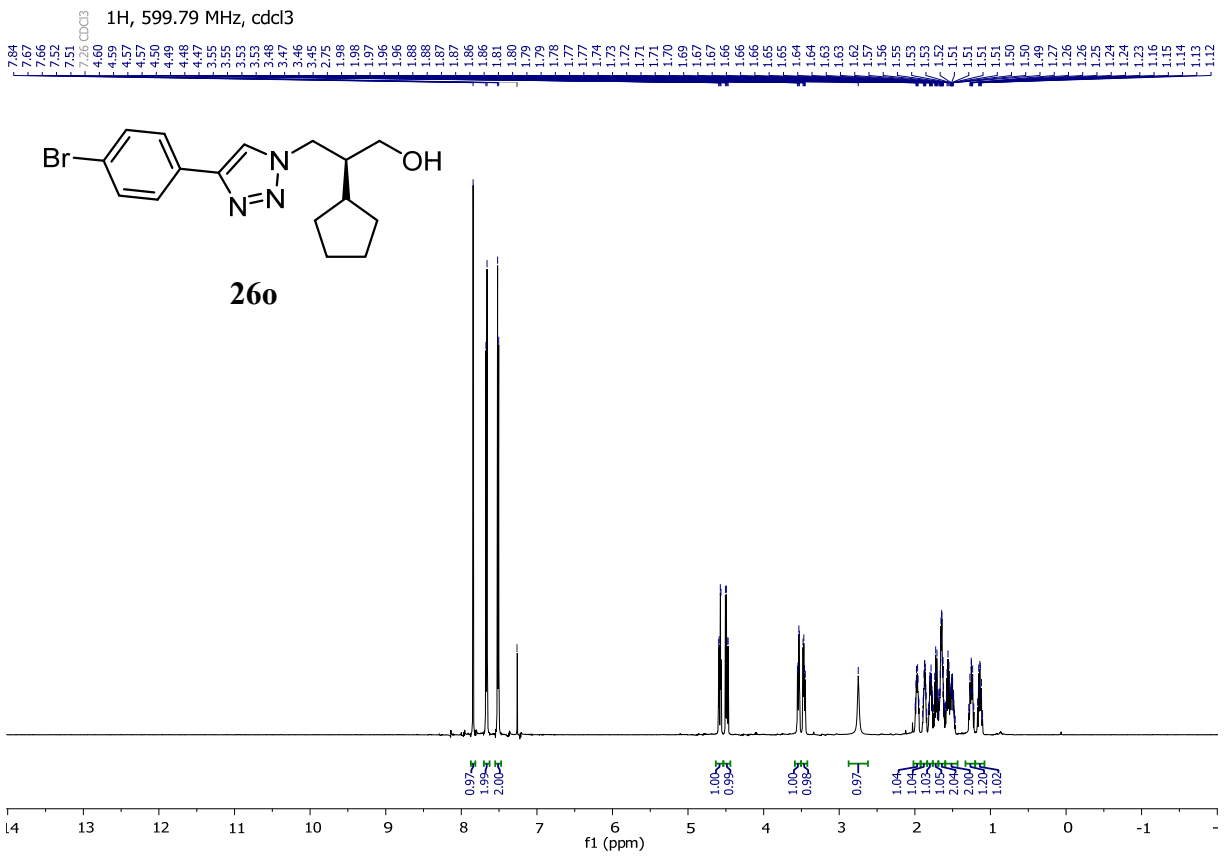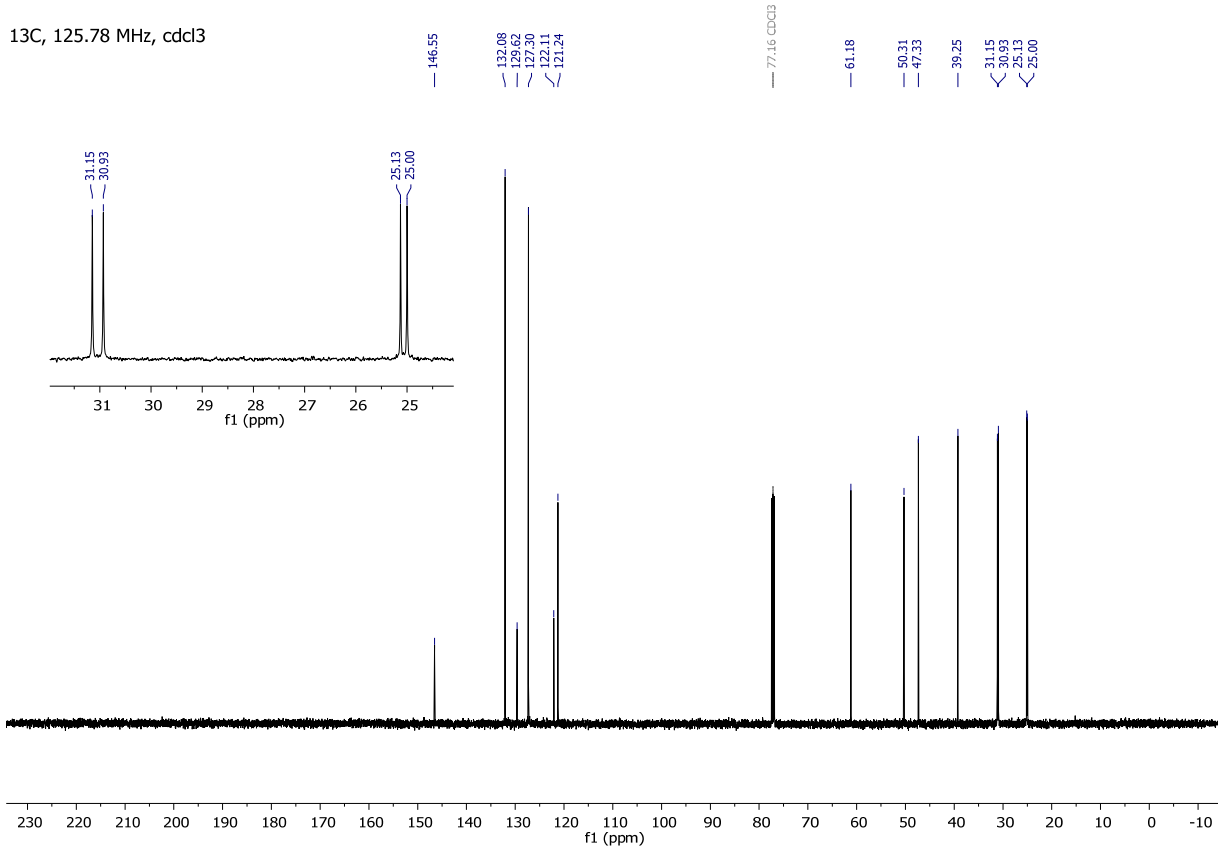

<sup>1</sup>H, 599.79 MHz, cdCl<sub>3</sub>

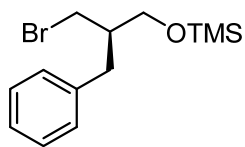

**2p**

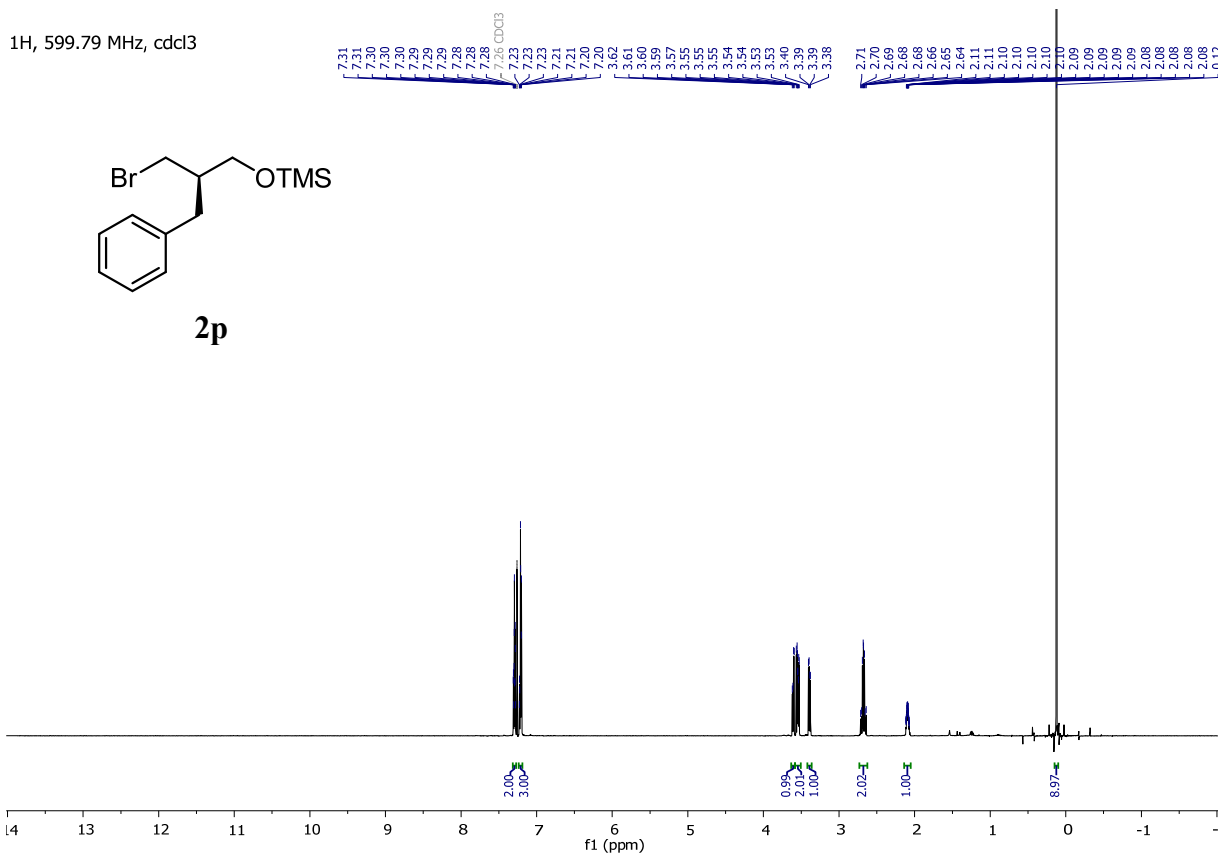

<sup>13</sup>C, 125.78 MHz, cdCl<sub>3</sub>

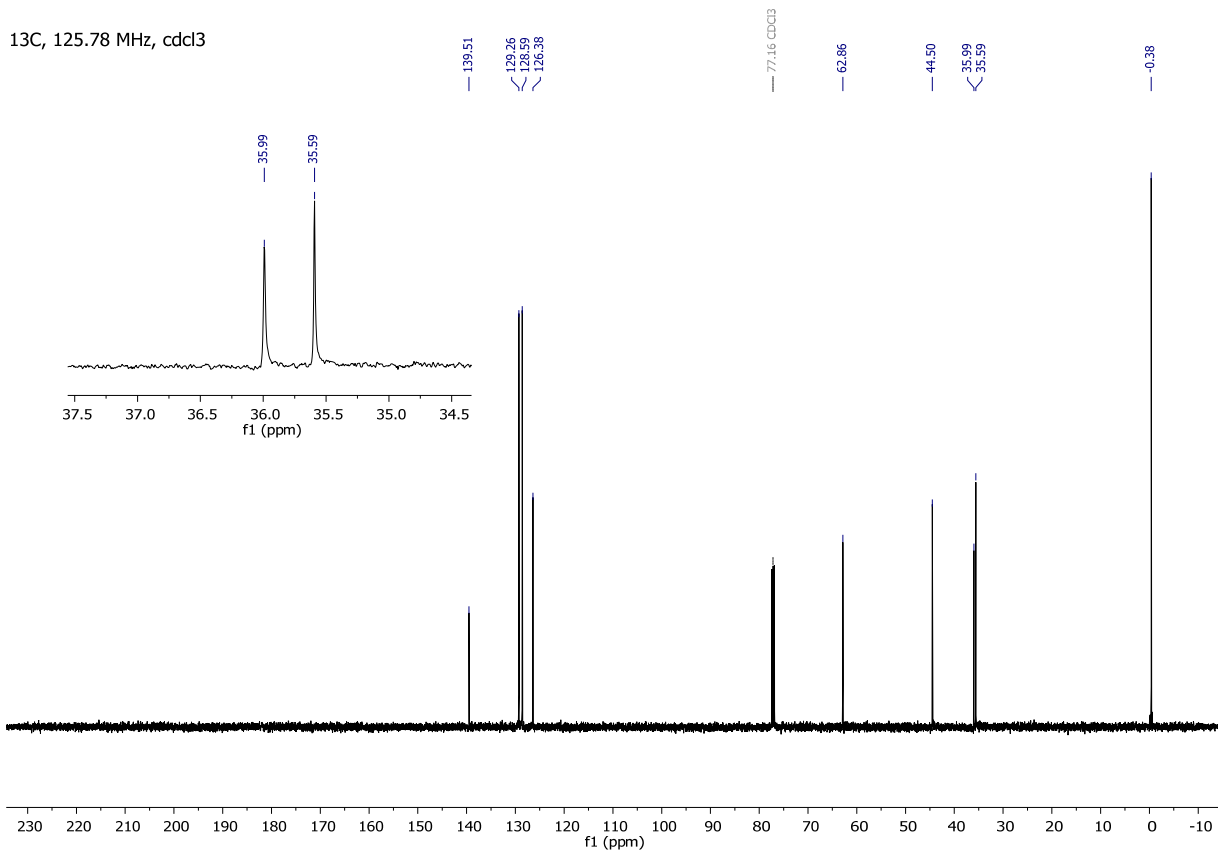

<sup>1</sup>H, 599.79 MHz, cdcl<sub>3</sub>

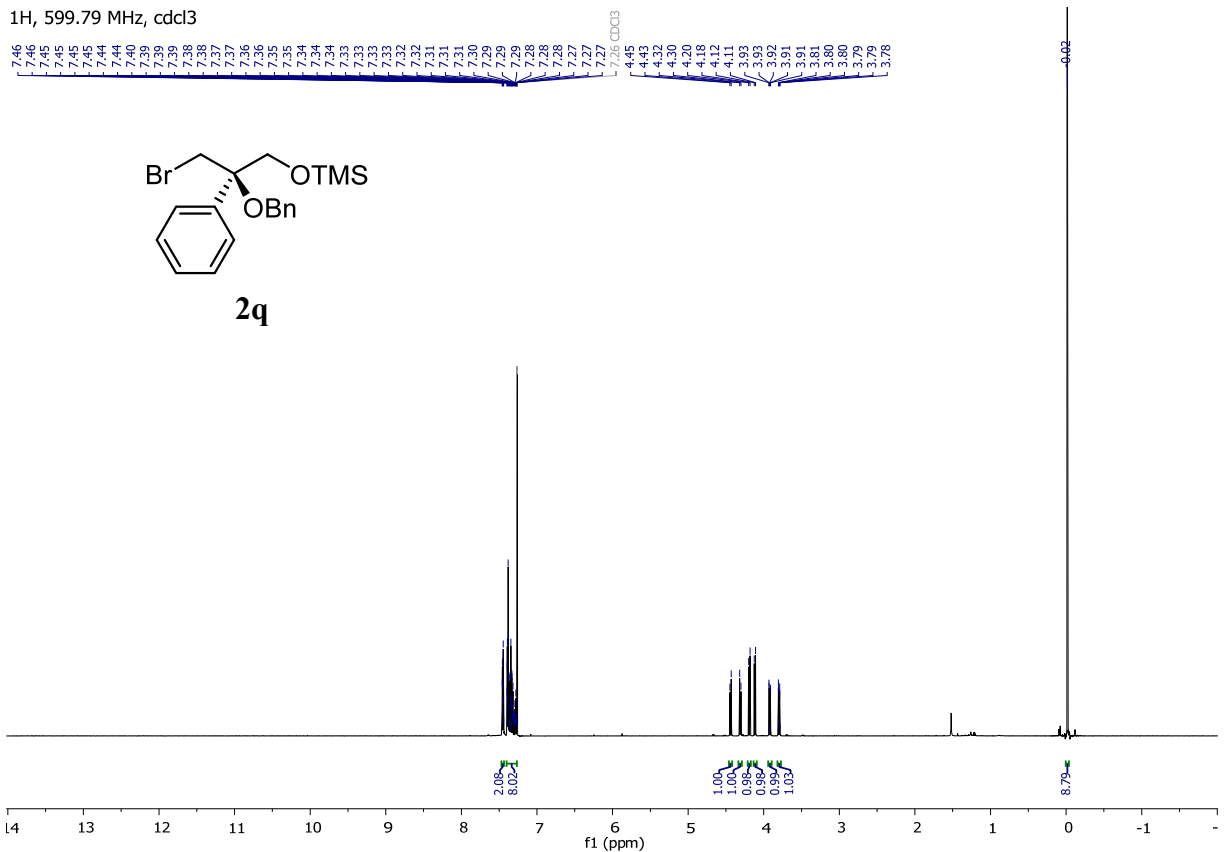

<sup>13</sup>C, 125.78 MHz, cdcl<sub>3</sub>

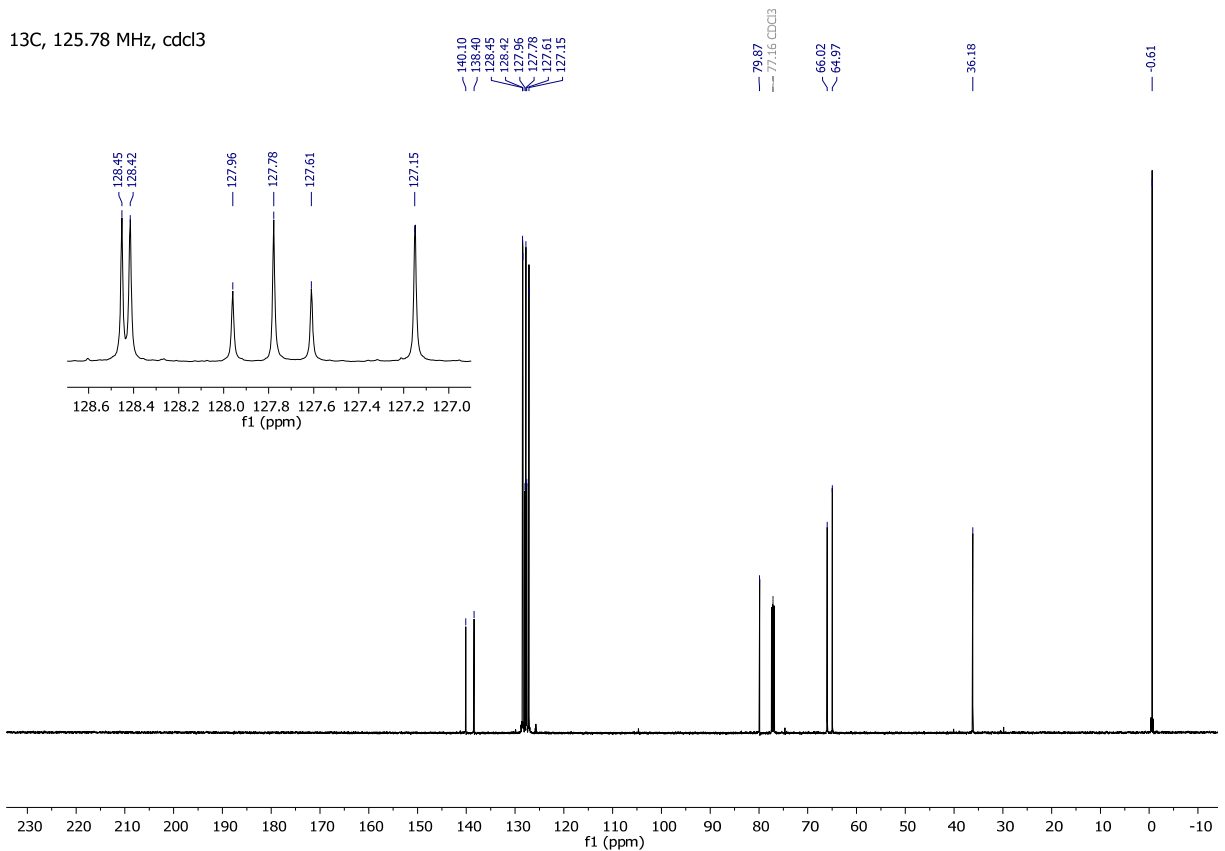



<sup>1</sup>H, 599.79 MHz, cdCl<sub>3</sub>

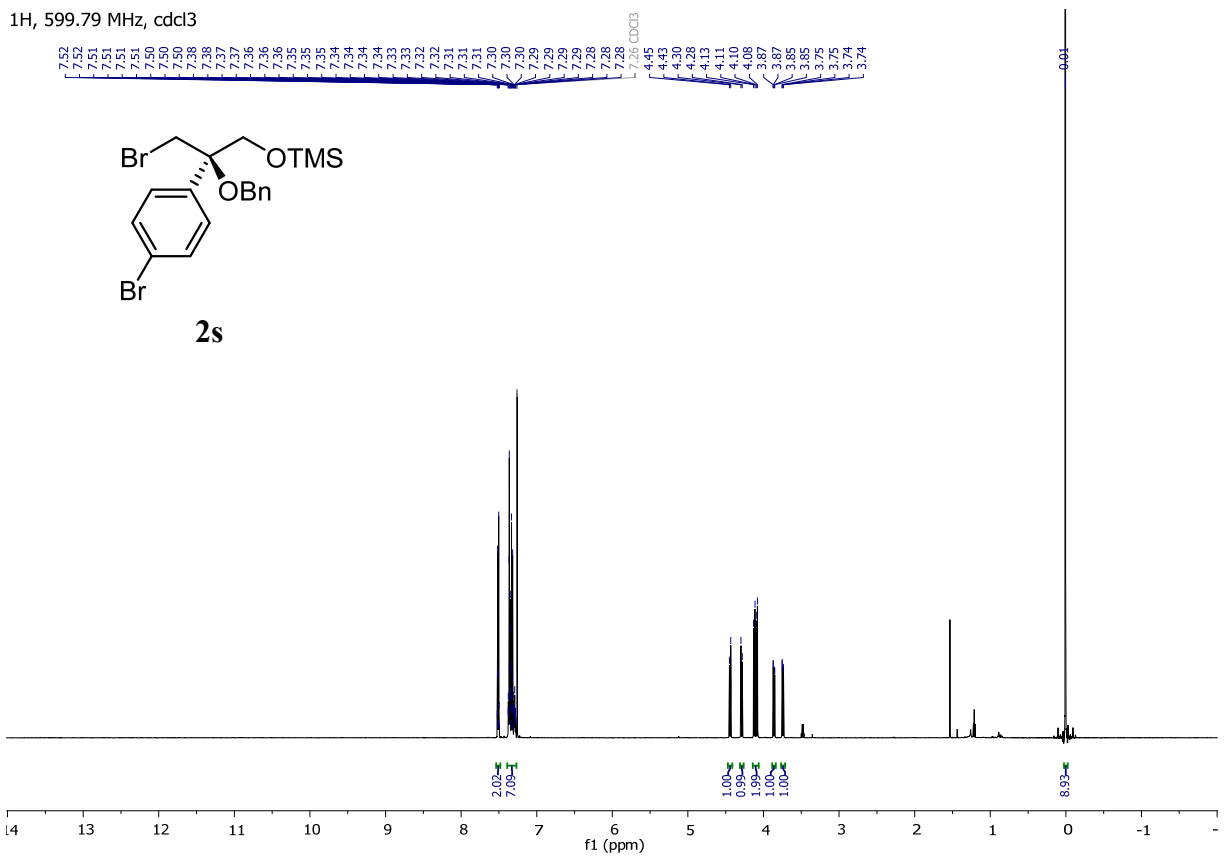

<sup>13</sup>C, 125.71 MHz, cdCl<sub>3</sub>

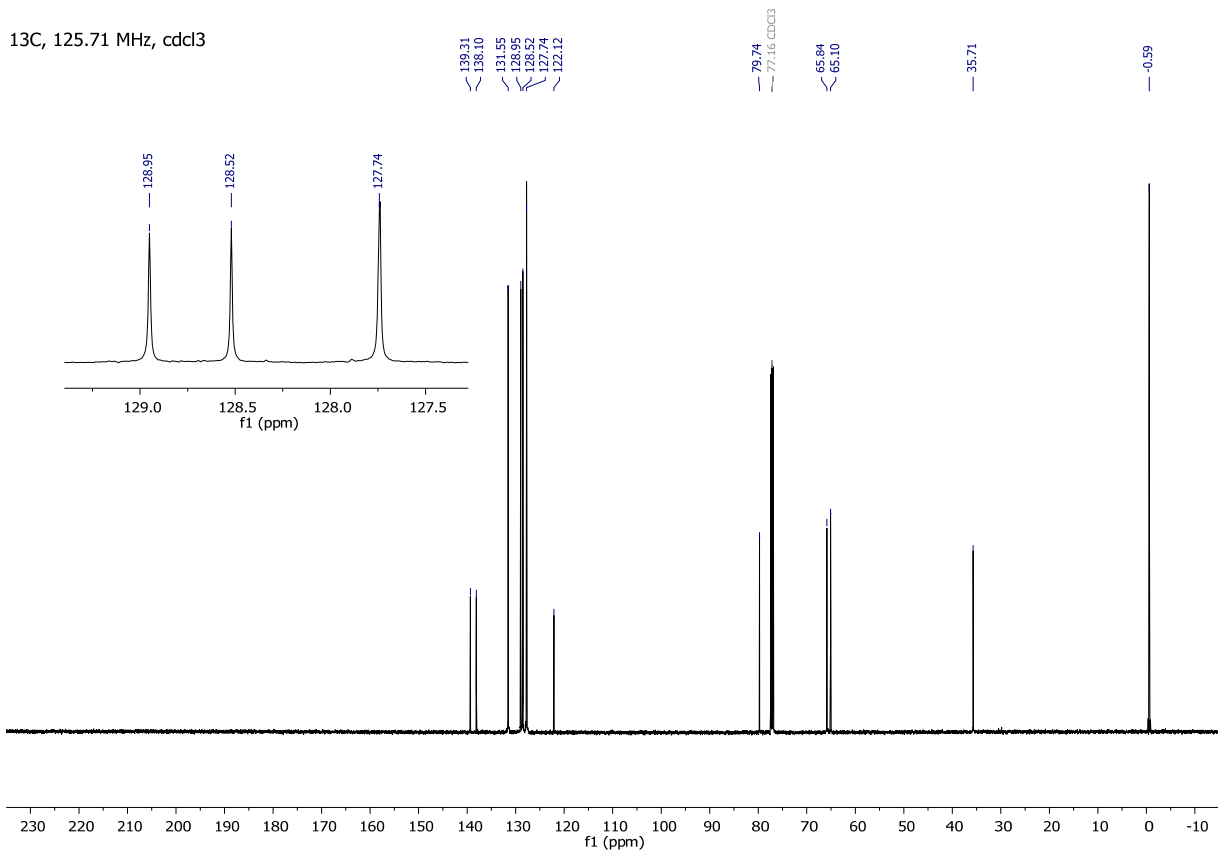

# <sup>13</sup>C spectrum with nonstandard exponential apodization

<sup>13</sup>C, 125.71 MHz, cdcl3

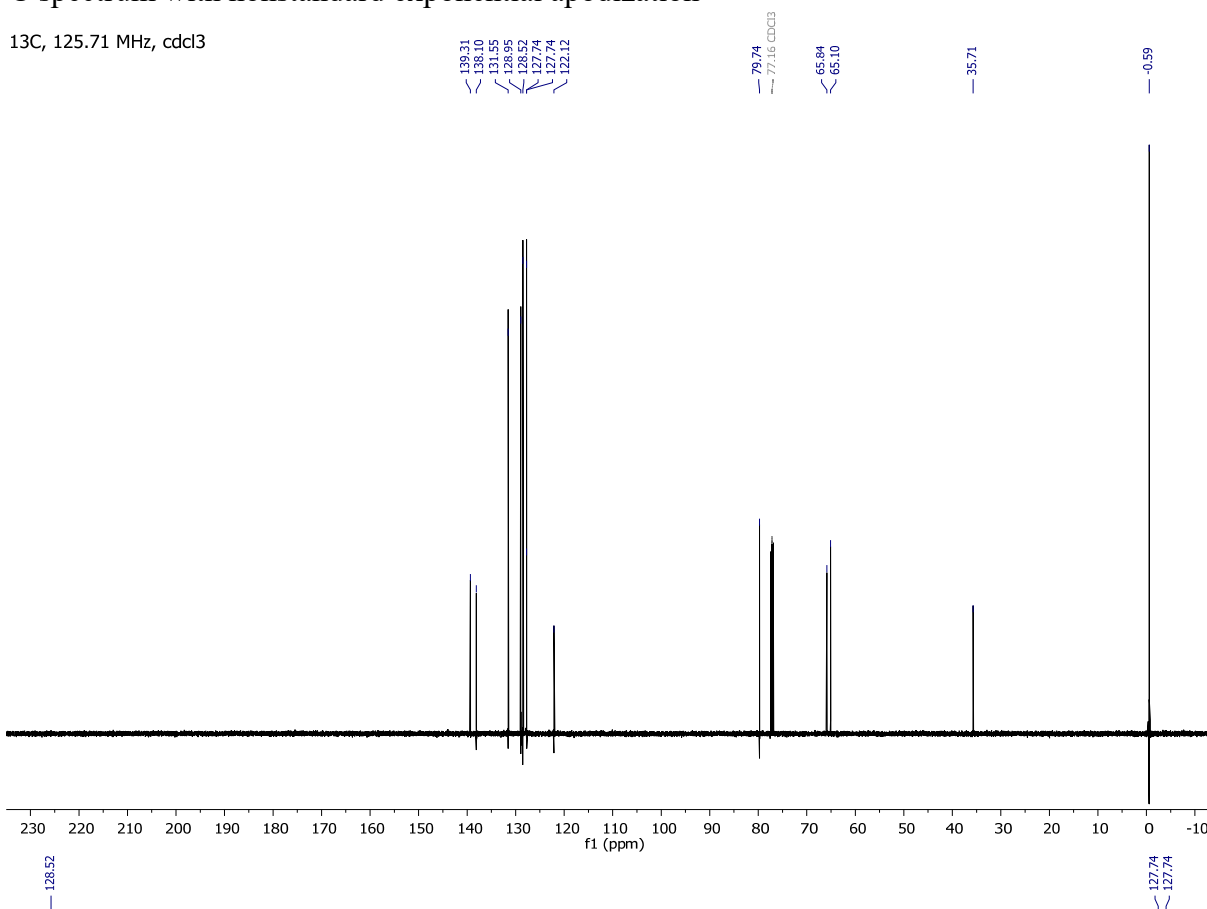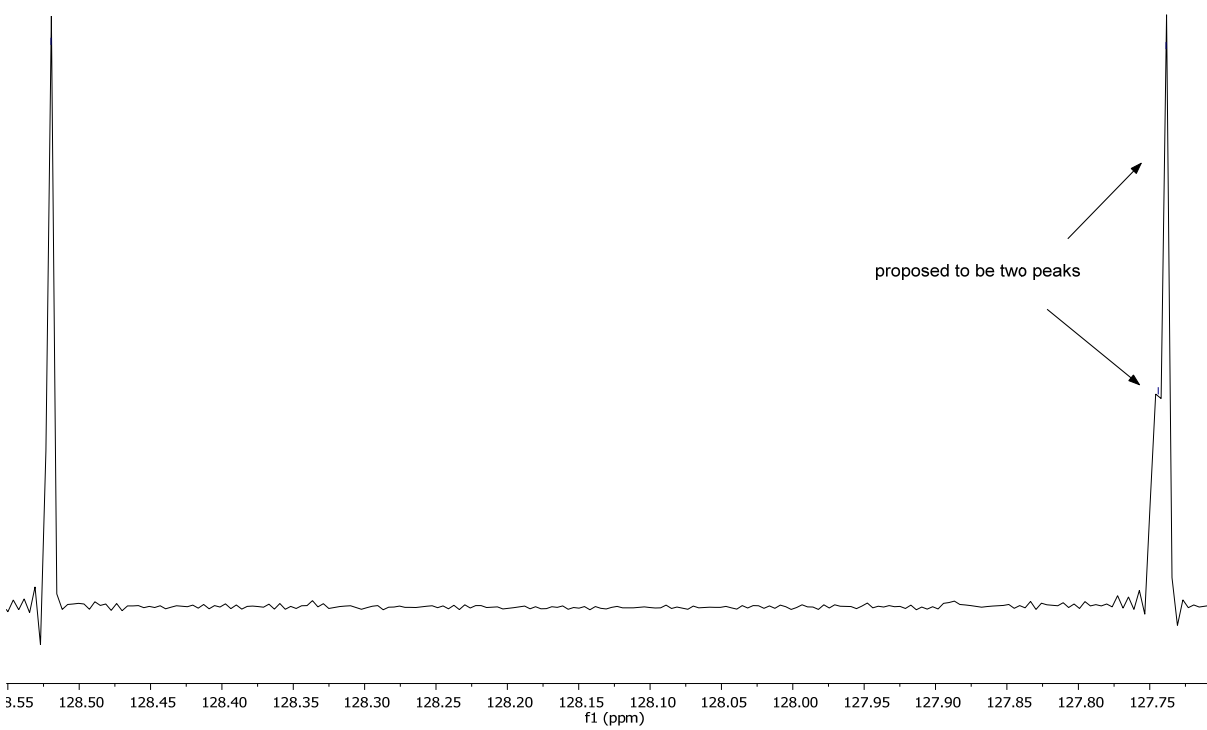

<sup>1</sup>H, 599.79 MHz, cdcl<sub>3</sub>

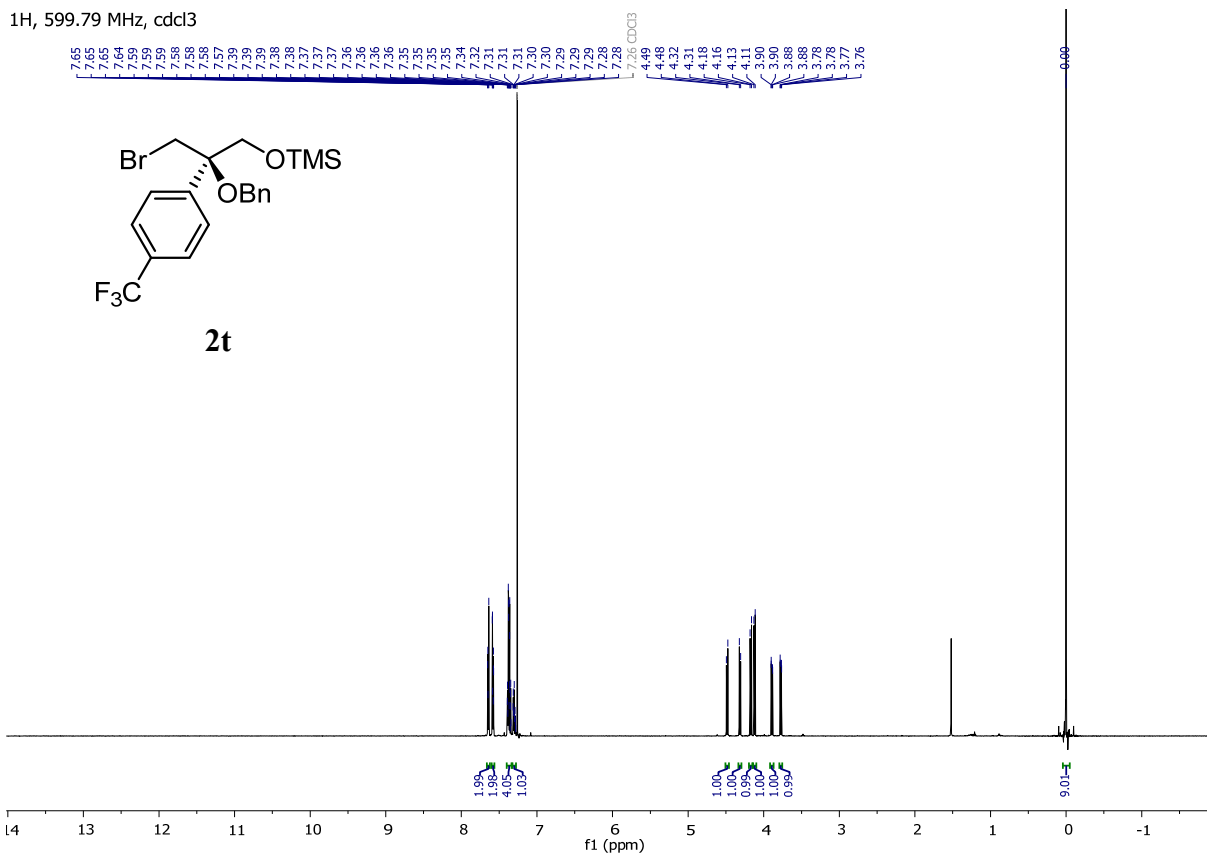

<sup>13</sup>C, 125.78 MHz, cdcl<sub>3</sub>

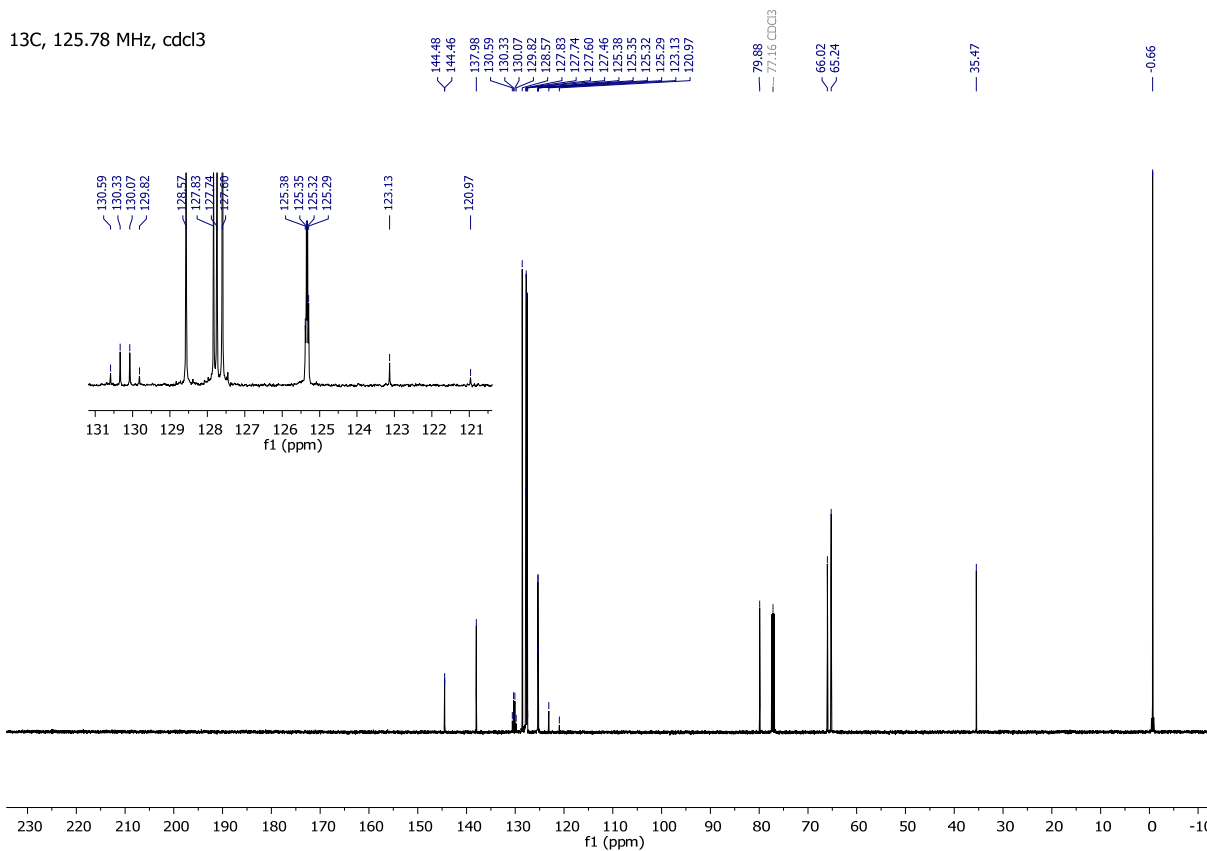



19F, 470.59 MHz, cdcl3

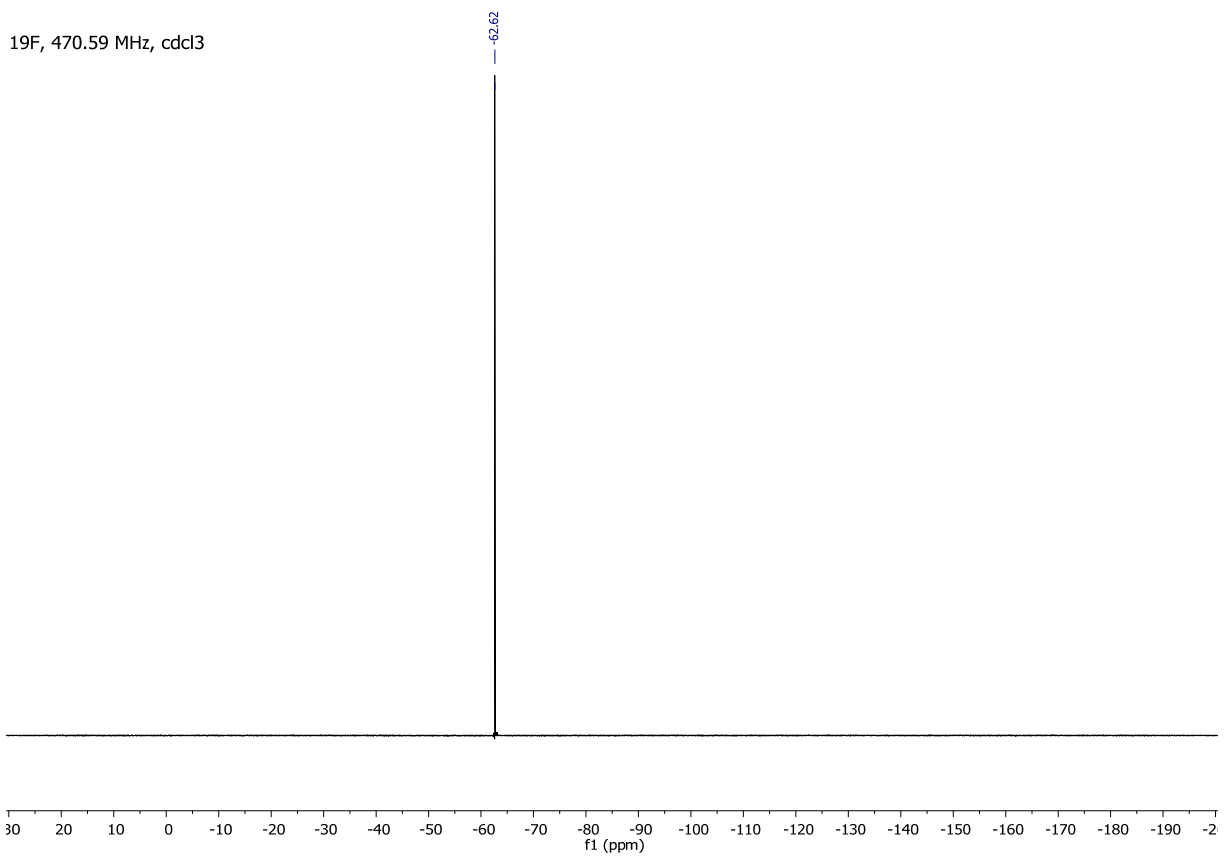



<sup>1</sup>H, 599.79 MHz, cdcl<sub>3</sub>

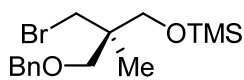

**2v**

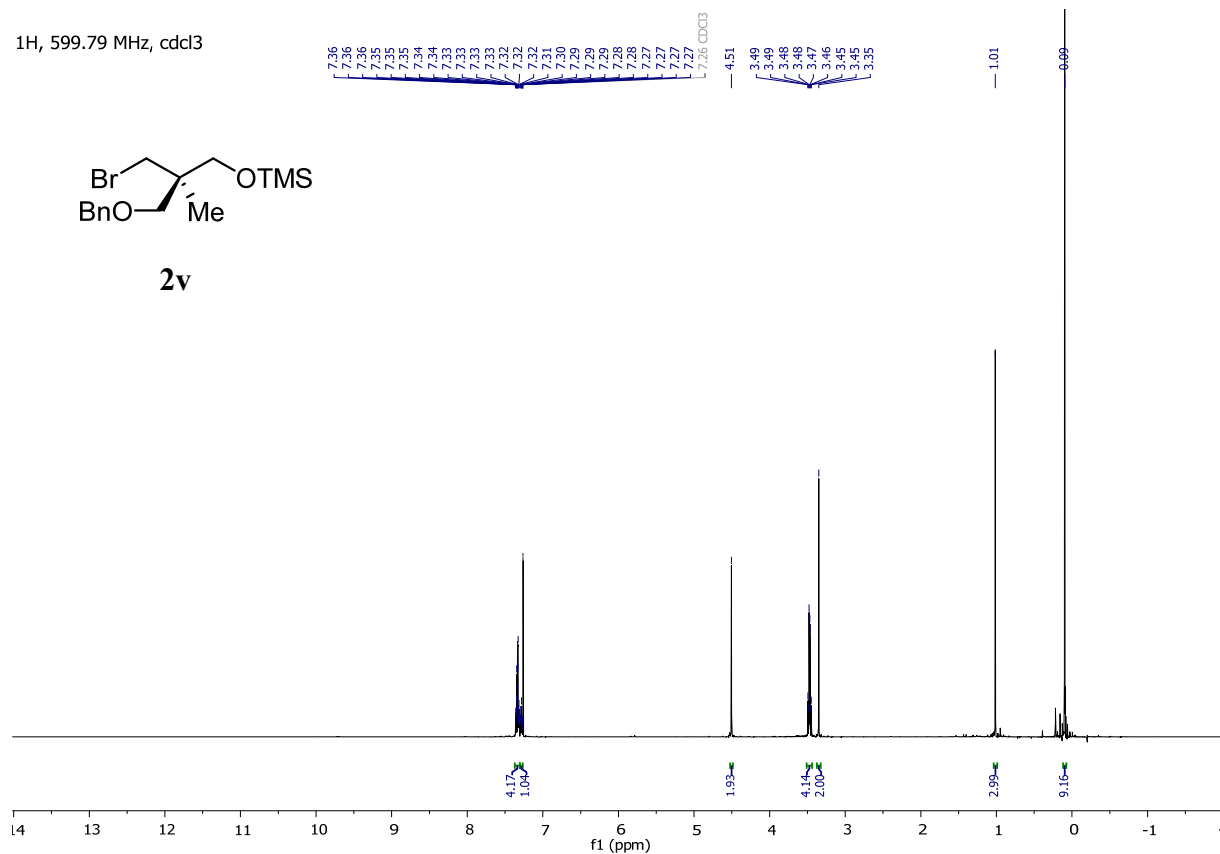

<sup>1</sup>H, 599.79 MHz, cdcl<sub>3</sub>

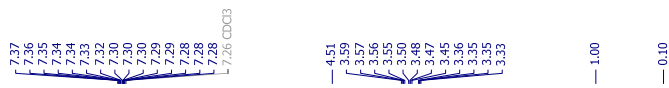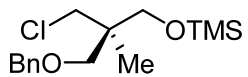

27

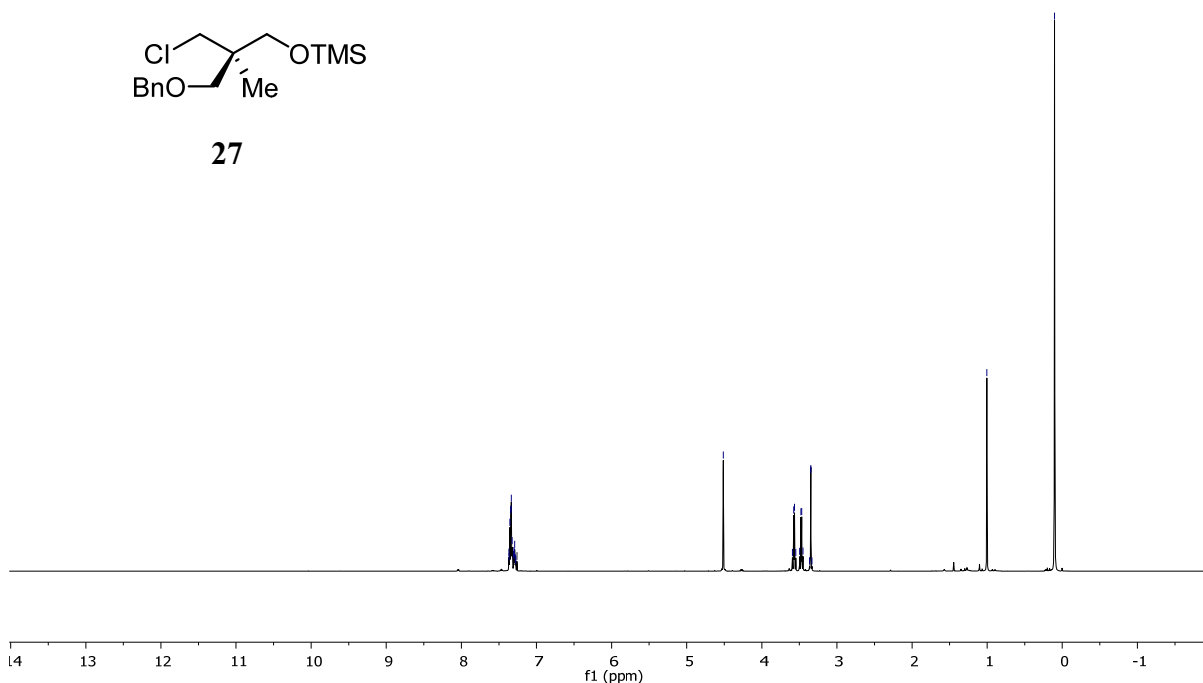

<sup>13</sup>C, 125.71 MHz, cdcl<sub>3</sub>

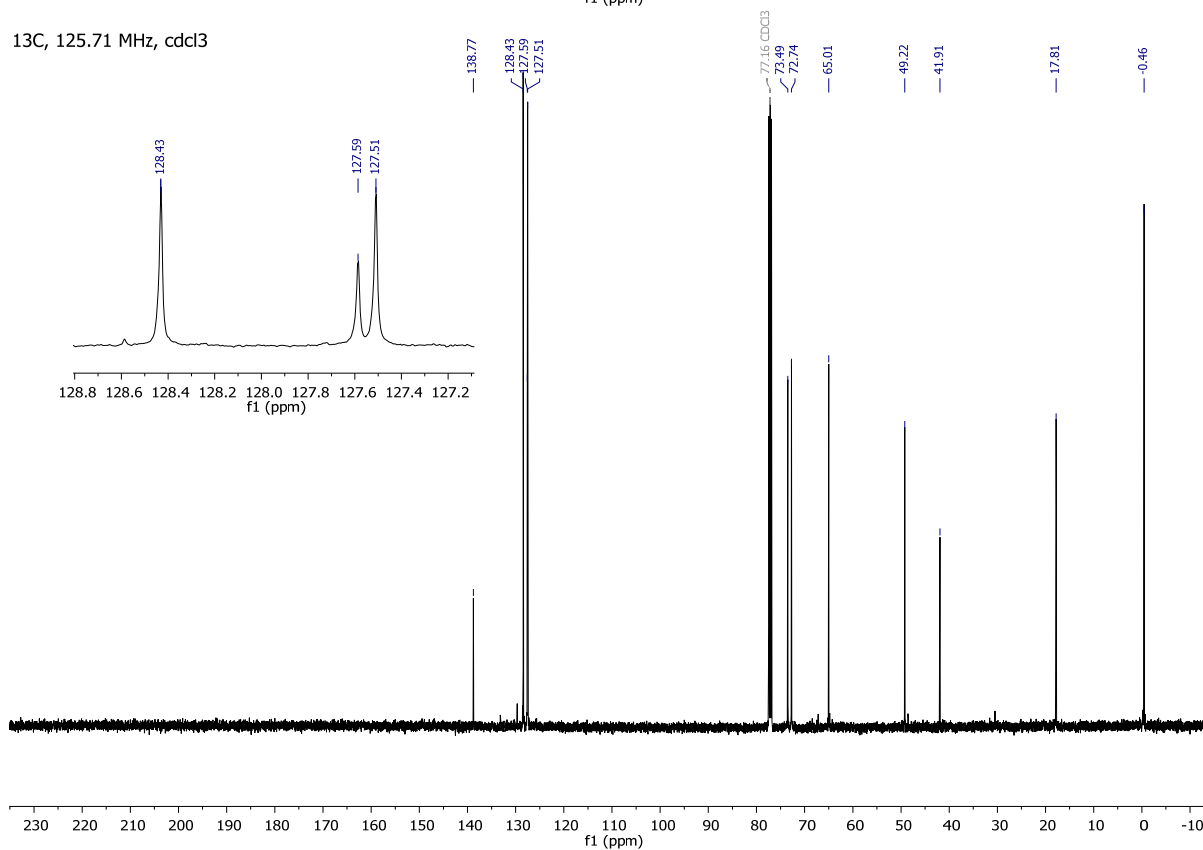

<sup>1</sup>H, 599.79 MHz, cdCl<sub>3</sub>

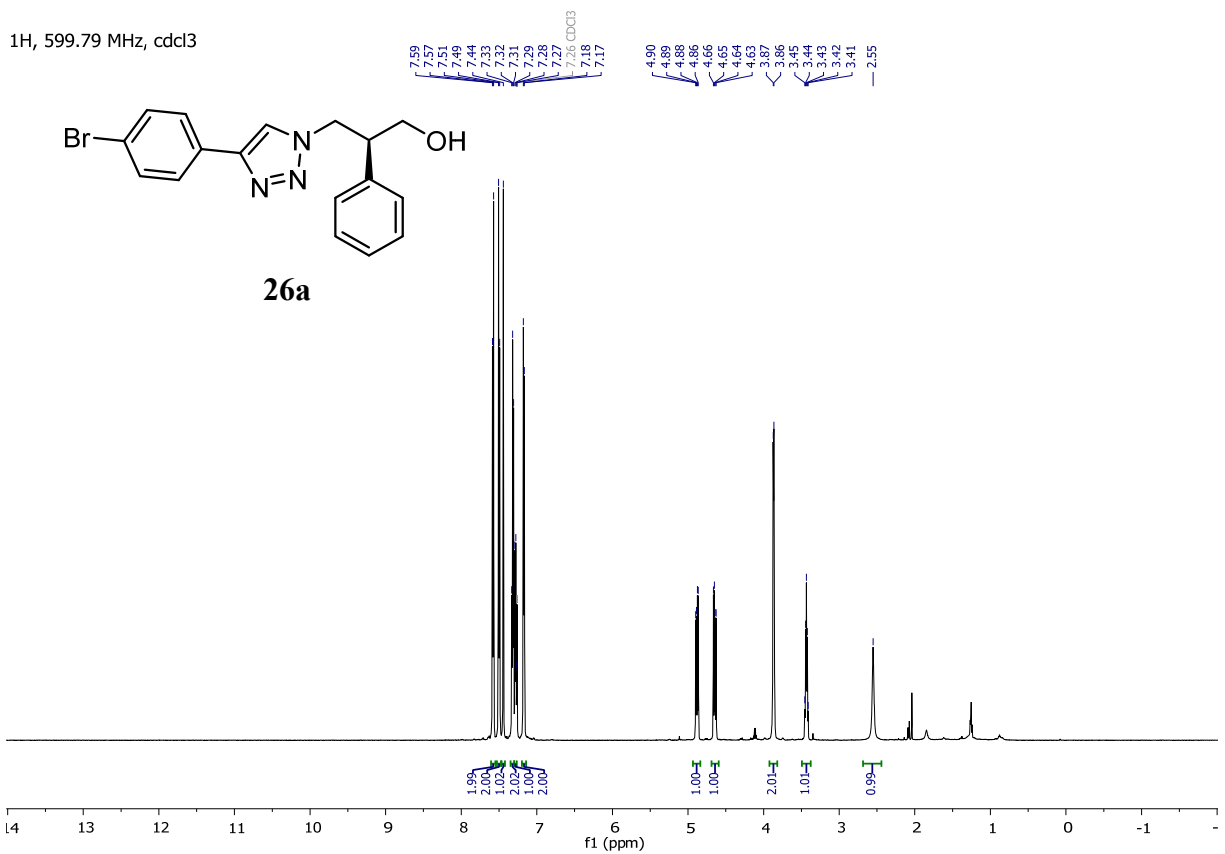

<sup>13</sup>C, 125.78 MHz, cdCl<sub>3</sub>

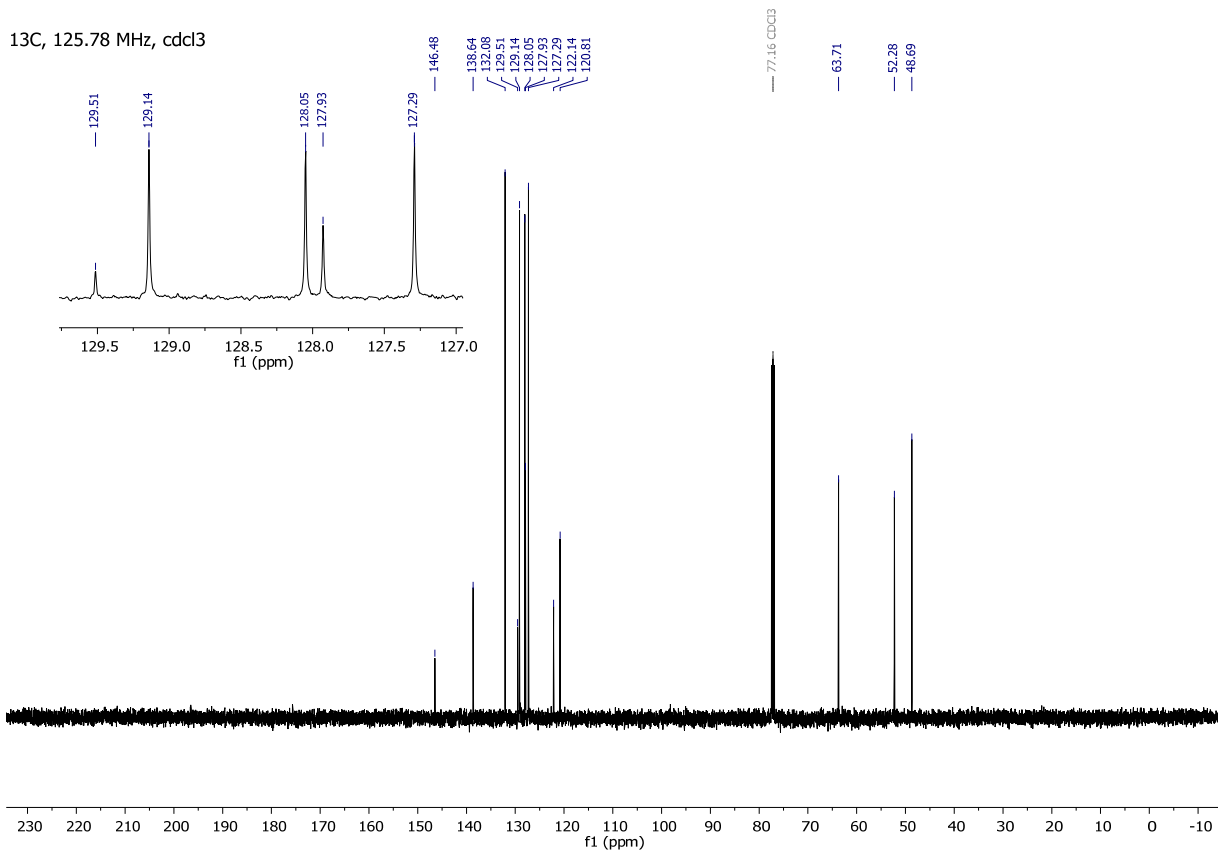

<sup>1</sup>H, 599.79 MHz, cdcl<sub>3</sub>

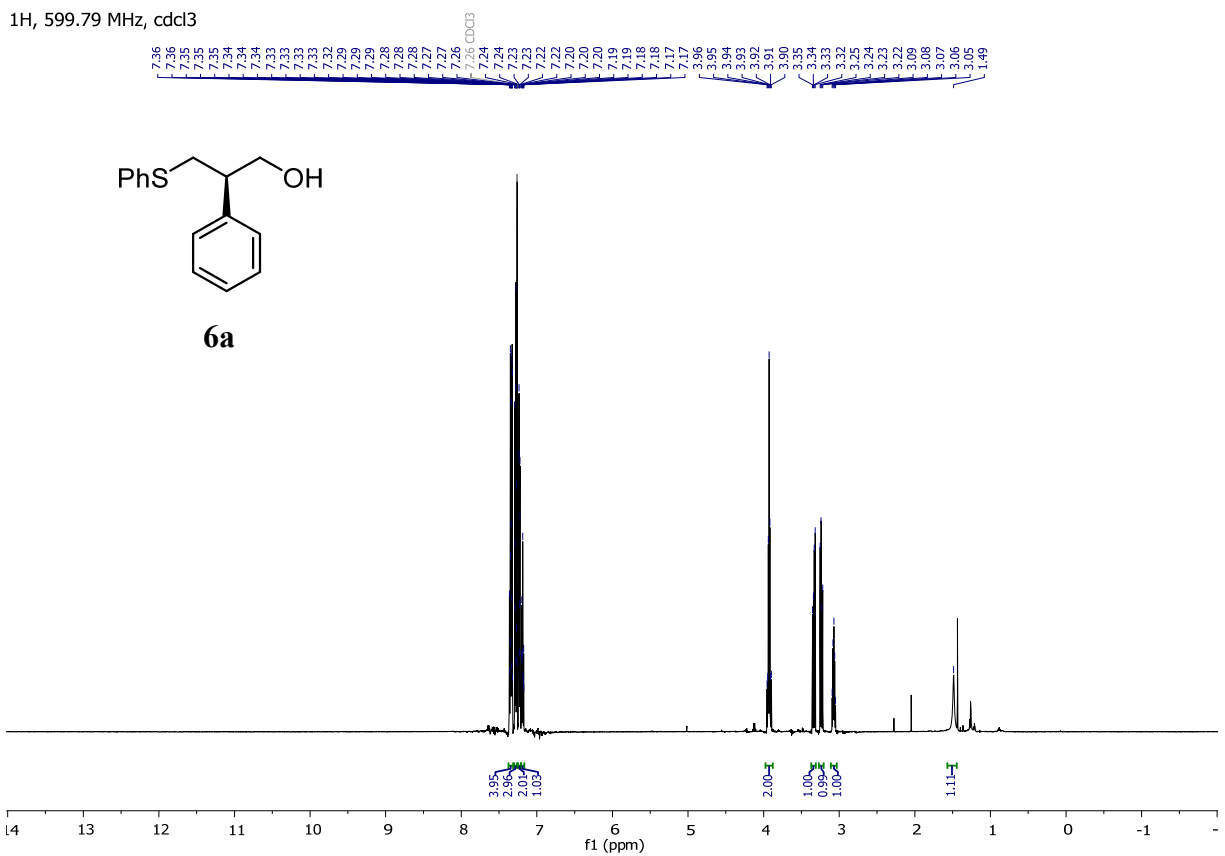

<sup>13</sup>C, 150.83 MHz, cdcl<sub>3</sub>

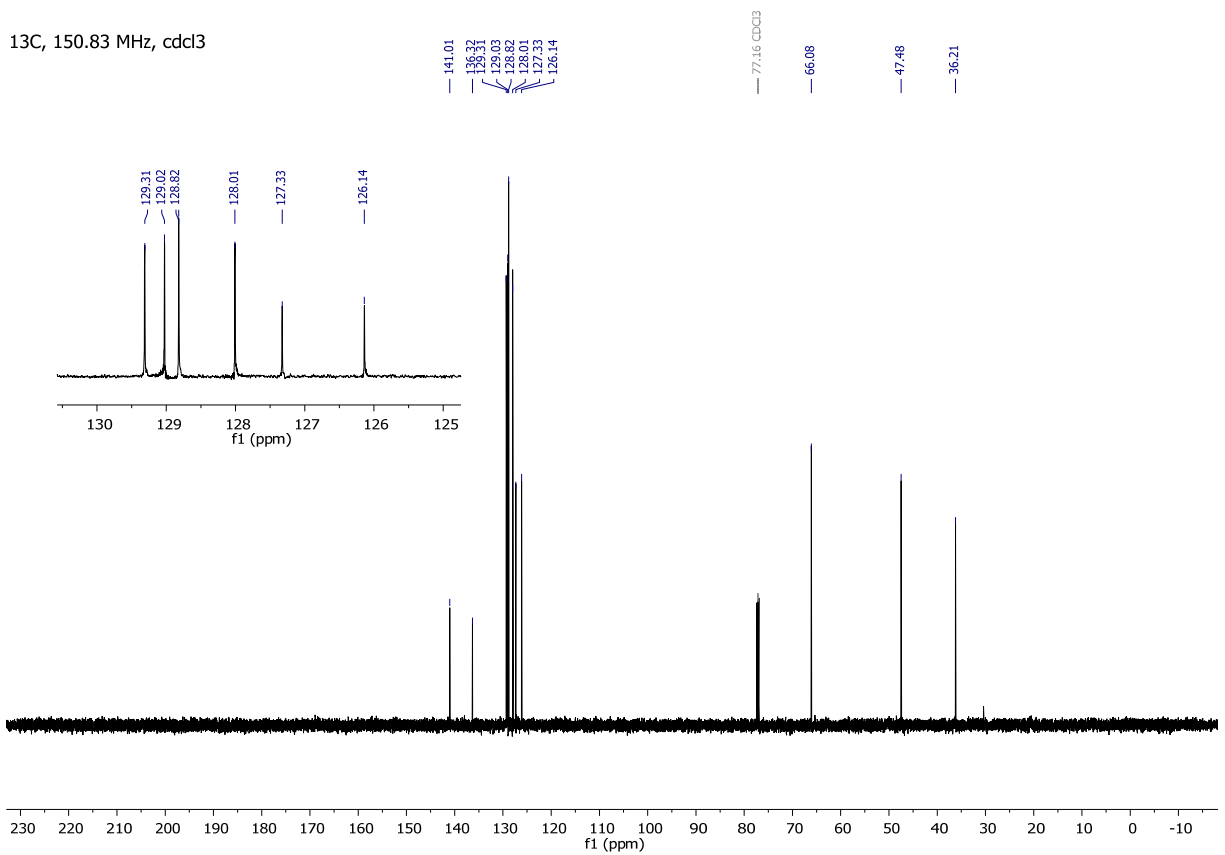

1H, 599.79 MHz, cdcl3

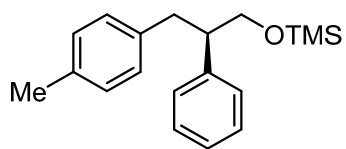

7a

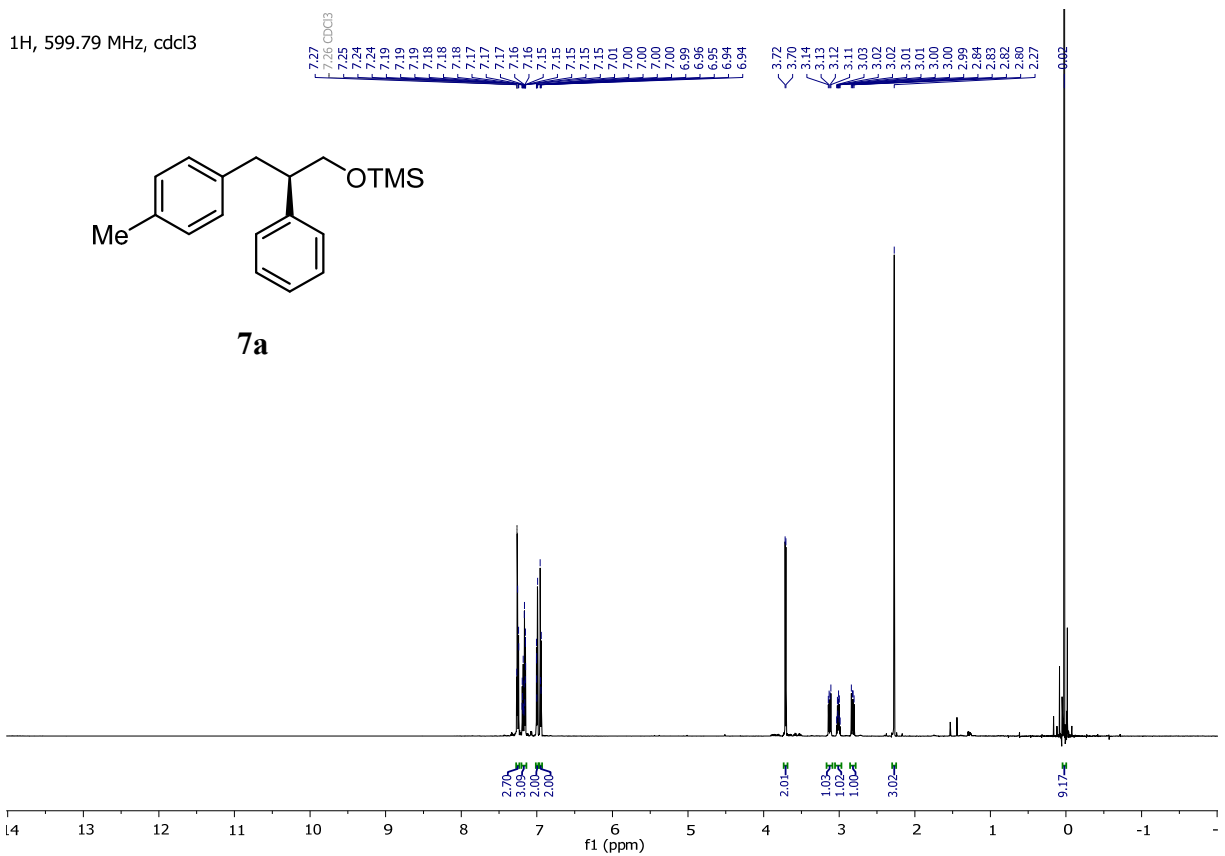

13C, 125.78 MHz, cdcl3

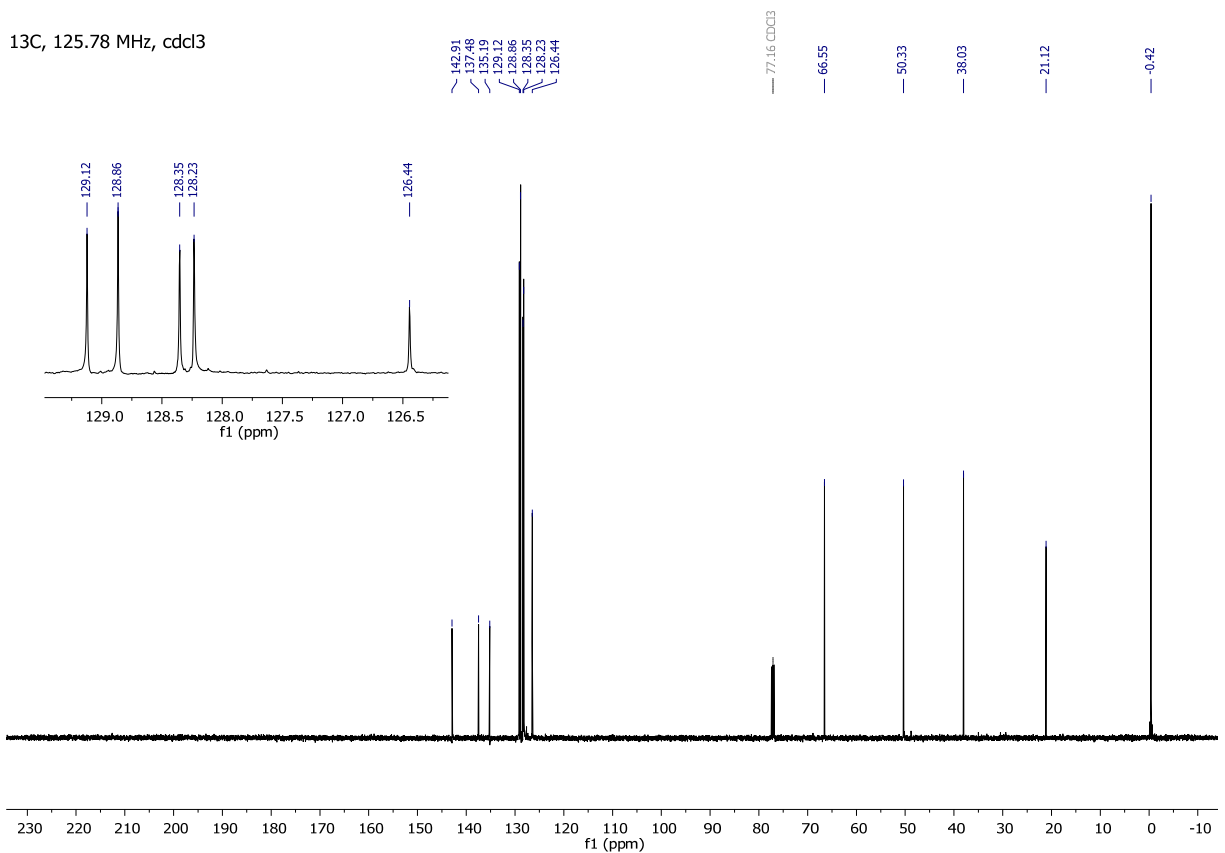

<sup>1</sup>H, 599.79 MHz, cdCl<sub>3</sub>

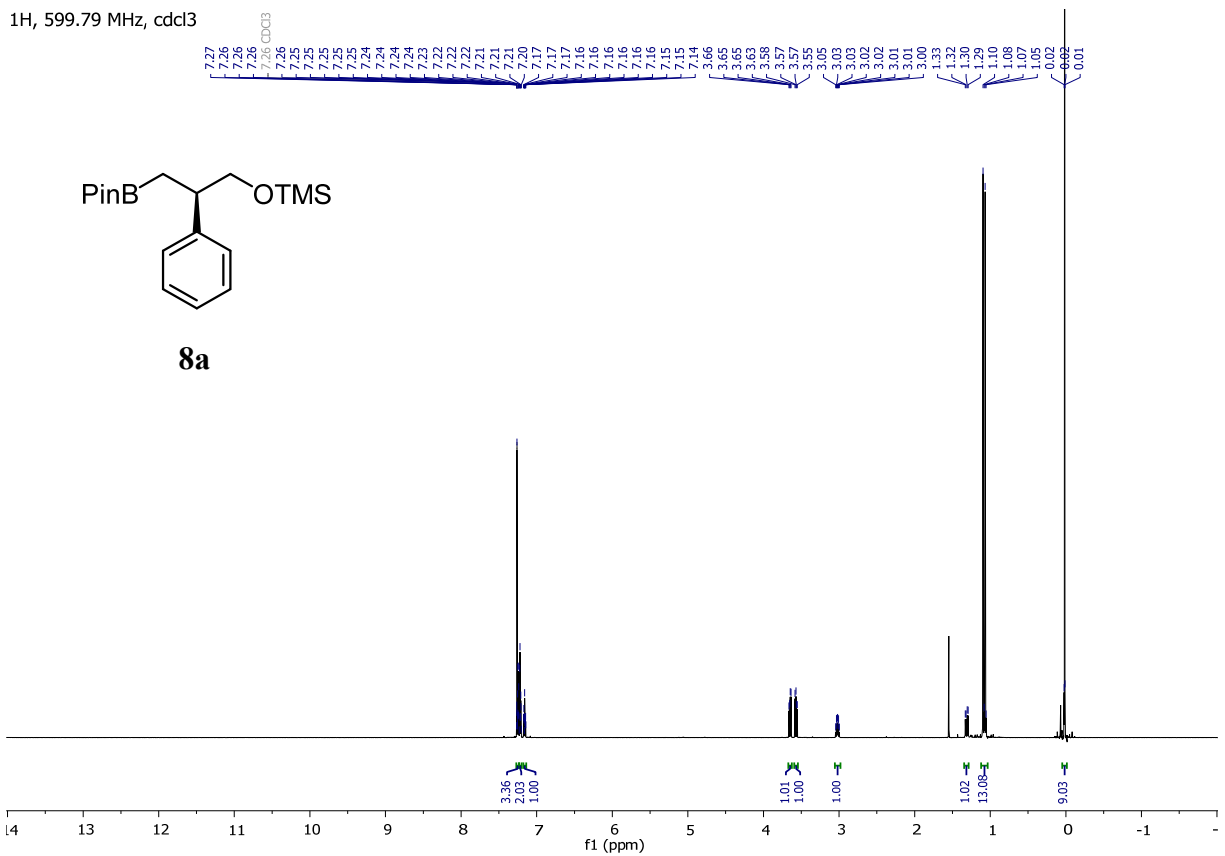

<sup>13</sup>C, 125.71 MHz, cdCl<sub>3</sub>

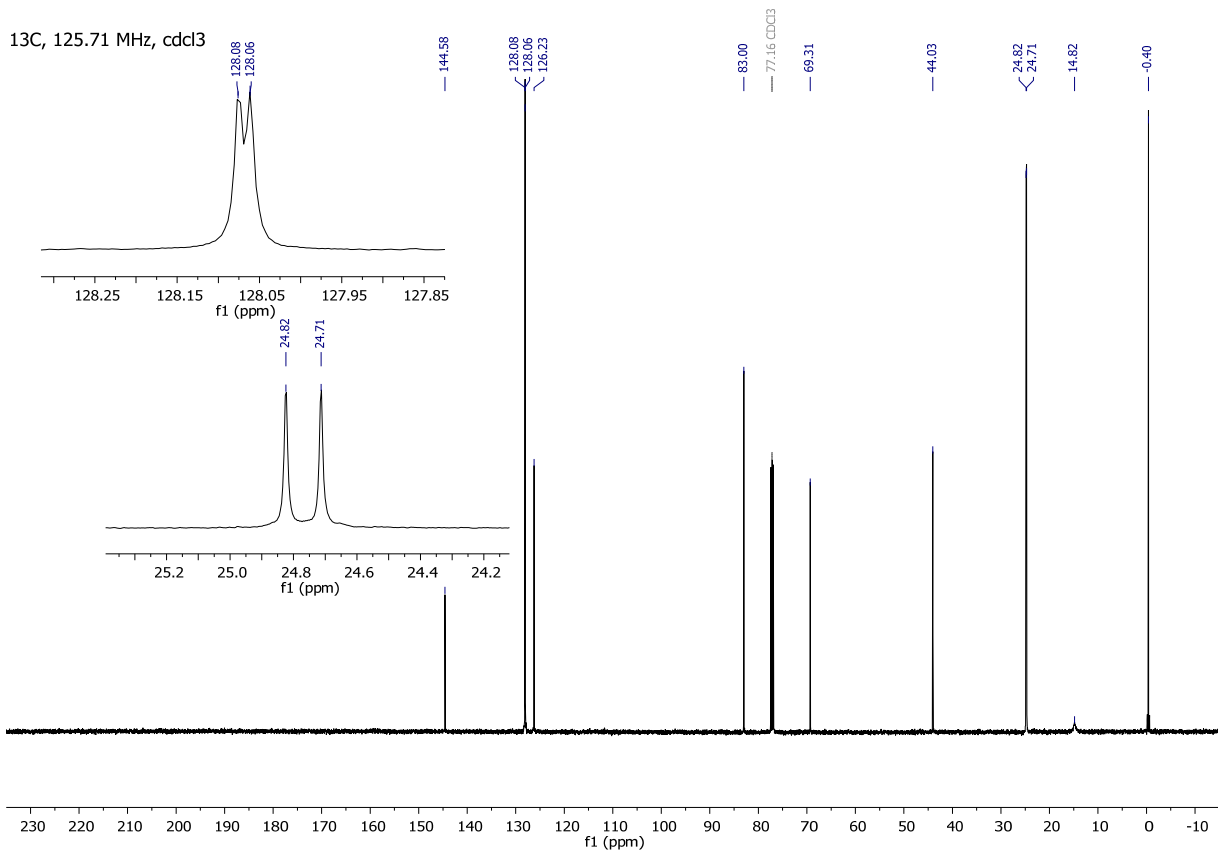



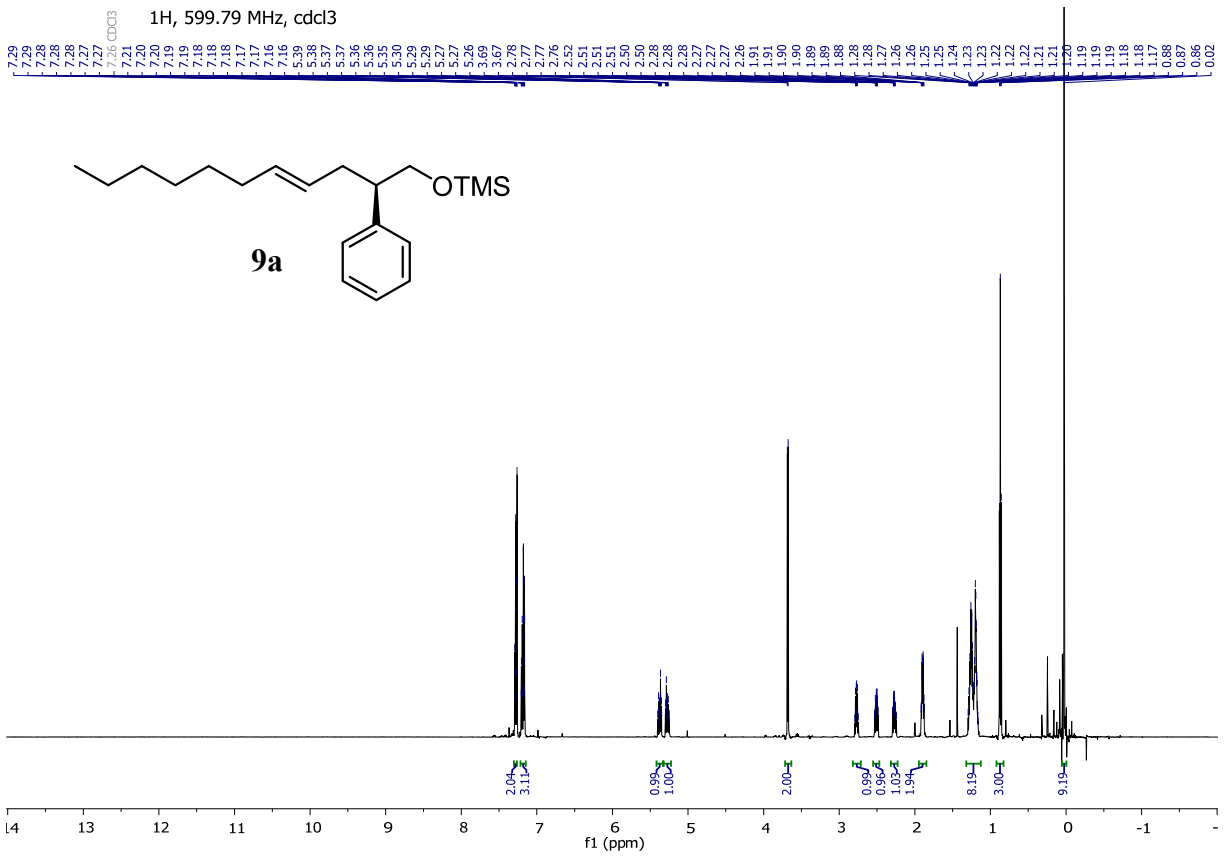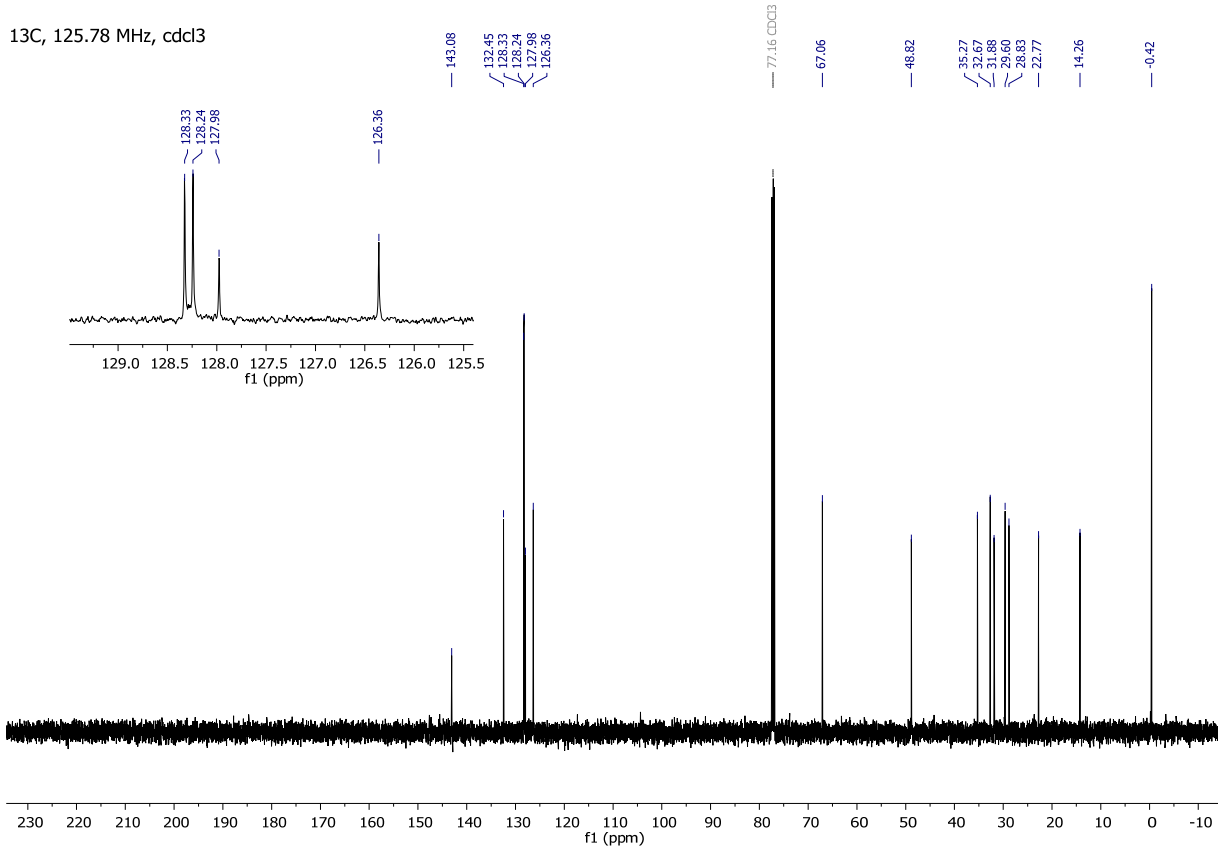

1H, 500.18 MHz, cdcl3

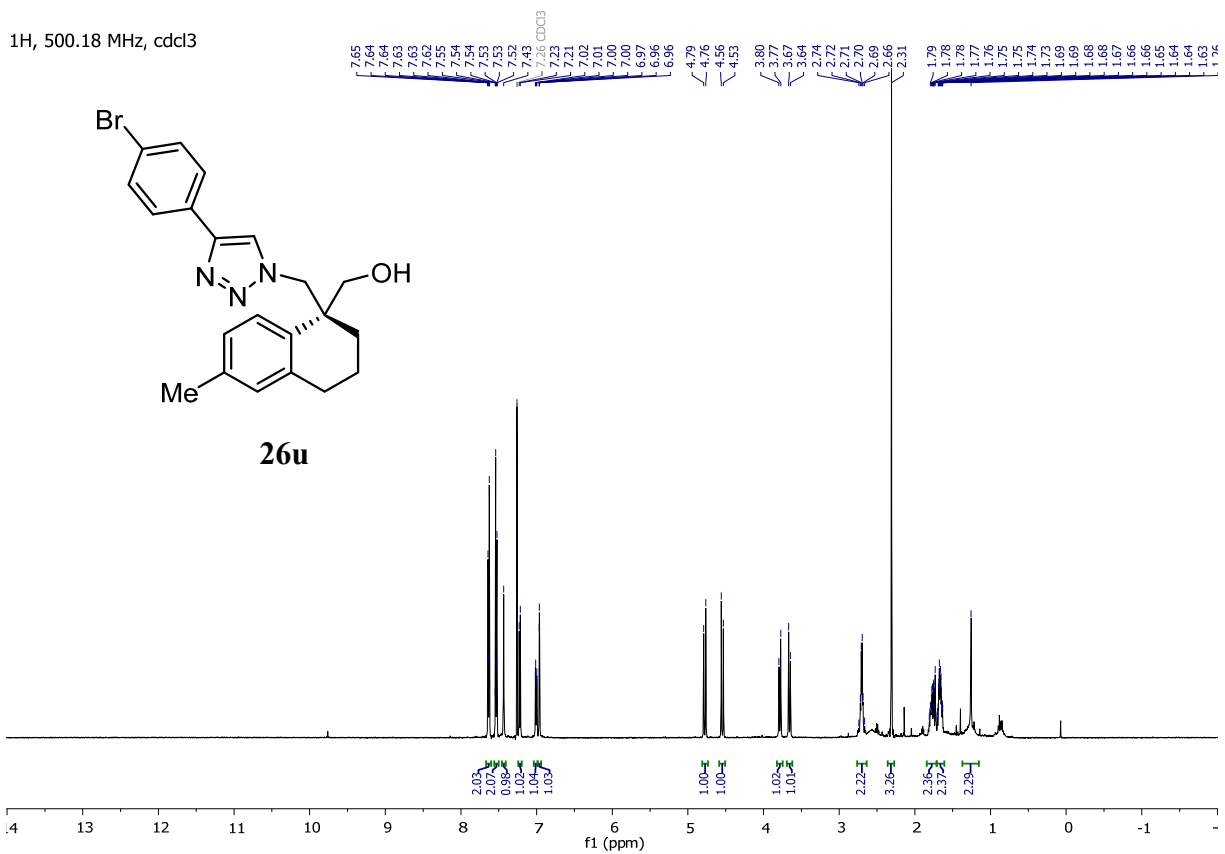

13C, 125.71 MHz, cdcl3

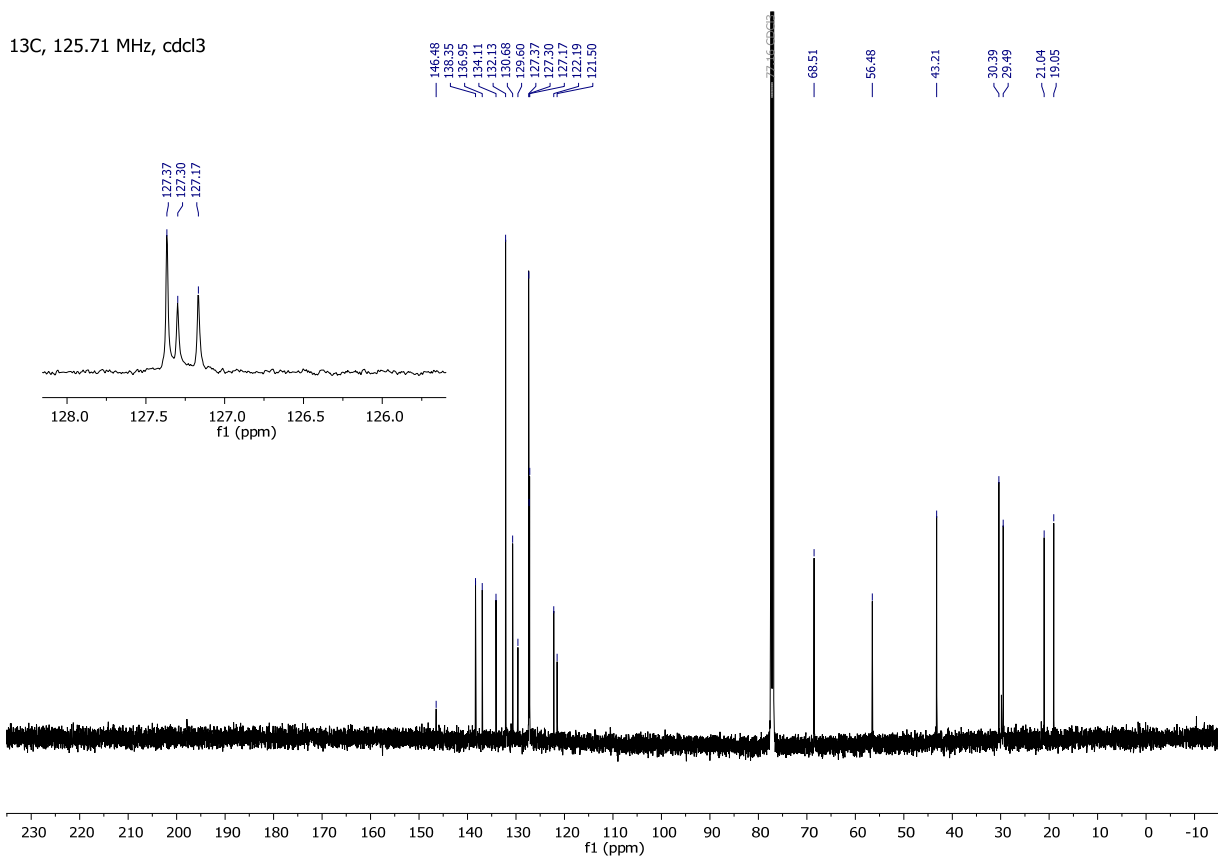

## References

- (1) Pabis, A.; Kaminski, R.; Ciepielowski, G.; Jankowski, S.; Paneth, P. Measurements of heavy-atom isotope effects using  $^1\text{H}$  NMR spectroscopy. *J. Org. Chem.* **2011**, *76*, 8033-8035. doi:10.1021/jo201226g
- (2) Singleton, D. A.; Thomas, A. A. High-precision simultaneous determination of multiple small kinetic isotope effects at natural abundance. *J. Am. Chem. Soc.* **1995**, *117*, 9357-9358. doi:10.1021/ja00141a030
- (3) Zuend, S. J.; Jacobsen, E. N. Mechanism of amido-thiourea catalyzed enantioselective imine hydrocyanation: transition state stabilization via multiple non-covalent interactions. *J. Am. Chem. Soc.* **2009**, *131*, 15358-15374. doi:10.1021/ja9058958
- (4) Guo, T.; Song, R.; Yuan, B.-H.; Chen, X.-Y.; Sun, X.-W.; Lin, G.-Q. Highly efficient asymmetric construction of quaternary carbon-containing homoallylic and homopropargylic amines. *Chem. Commun.* **2013**, *49*, 5402-5404. doi:10.1039/C3CC42481B
- (5) Yan, W.; Du, D.-M. Highly enantioselective Michael addition of nitroalkanes to chalcones using chiral squaramides as hydrogen bonding organocatalysts. *Org. Lett.* **2010**, *12*, 5450-5453. doi:10.1021/ol102294g
- (6) Bendel-Smith, A. J.; Kim, S. C.; Wasa, M.; Roche, S. P.; Jacobsen, E. N. Enantioselective synthesis of  $\alpha$ -allyl amino esters via hydrogen-bond-donor catalysis. *J. Am. Chem. Soc.* **2019**, *141*, 11414-11419. doi:10.1021/jacs.9b05556
- (7) Karlsson, S.; Hallberg, A.; Gronowitz, S. Hydrozirconation of (*E*)-3-methoxy-1-phenyl-1-propene and (*E*)-3-phenyl-2-propenol. *J. Organometallic Chem.* **1991**, *403*, 133-144. doi:10.1016/0022-328X(91)83094-K
- (8) Zhang, H.; Lin, S.; Jacobsen, E. N. Enantioselective selenocyclization via dynamic kinetic resolution of seleniranium ions by hydrogen-bond-donor catalysts. *J. Am. Chem. Soc.* **2014**, *136*, 16485-16488. doi:10.1021/ja510113s
- (9) Duncton, M. A. J.; Estiarte, M. A.; Tan, D.; Kaub, C.; O'Mahony, D. J. R.; Johnson, R. J.; Cox, M.; Edwards, W. T.; Wan, M.; Kincaid, J.; Kelly, M. G. Preparation of aryloxetanes and arylazetidines by use of an alkyl-aryl Suzuki coupling. *Org. Lett.* **2008**, *10*, 3259-3262. doi:10.1021/ol8011327
- (10) Yang, W.; Wang, Z.; Sun, J. Enantioselective oxetane ring opening with chloride: unusual use of wet molecular sieves for the controlled release of HCl. *Angew. Chem., Int. Ed.* **2016**, *55*, 6954-6958. doi:10.1002/anie.201601844
- (11) Loy, R. N.; Jacobsen, E. N. Enantioselective intramolecular openings of oxetanes catalyzed by (salen)Co(III) complexes: access to enantioenriched tetrahydrofurans. *J. Am. Chem. Soc.* **2009**, *131*, 2786-2787. doi:10.1021/ja809176m
- (12) Yip, S. F.; Cheung, H. Y.; Zhou, Z.; Kwong, F. Y. Room-temperature copper-catalyzed  $\alpha$ -arylation of malonates. *Org. Lett.* **2007**, *9*, 3469-3472. doi:10.1021/ol701473p
- (13) Rios-Lombardia, N.; Busto, E.; Garcia-Urdiales, E.; Gotor-Fernandez, V.; Gotor, V. Enzymatic desymmetrization of prochiral 2-substituted-1,3-diamines: preparation of valuable nitrogenated compounds. *J. Org. Chem.* **2009**, *74*, 2571-2574. doi:10.1021/jo8025912
- (14) Meguellati, A.; Ahmed-Belkacem, A.; Nurisso, A.; Yi, W.; Brillat, R.; Berqouch, N.; Chavoutier, L.; Fortuné, A.; Pawlotsky, J.-M.; Boumendjel, A.; Peuchmaur, M. New pseudodimeric aurones as palm pocket inhibitors of hepatitis C virus RNA-dependent RNA polymerase. *Eur. J. Med. Chem.* **2016**, *115*, 217-227. doi:10.1016/j.ejmech.2016.03.005
- (15) Puente, A.; He, S.; Corral-Bautista, F.; Ofial, A. R.; Mayr, H. Nucleophilic reactivities of 2-substituted malonates. *Eur. J. Org. Chem.* **2016**, *2016*, 1841-1848. doi:10.1002/ejoc.201600107
- (16) Morimoto, T.; Fujii, T.; Miyoshi, K.; Makado, G.; Tanimoto, H.; Nishiyama, Y.; Kakiuchi, K. Accessible protocol for asymmetric hydroformylation of vinylarenes using formaldehyde. *Org. Biomol. Chem.* **2015**, *13*, 4632-4636. doi:10.1039/C5OB00378D
- (17) Molander, G. A.; Traister, K. M.; O'Neill, B. T. Reductive cross-coupling of nonaromatic, heterocyclic bromides with aryl and heteroaryl bromides. *J. Org. Chem.* **2014**, *79*, 5771-5780. doi:10.1021/jo500905m
- (18) Liang, A.; Han, S.; Wang, L.; Li, J.; Zou, D.; Wu, Y.; Wu, Y. Palladium-catalyzed carbonylations of arylboronic acids: synthesis of arylcarboxylic acid ethyl esters. *Adv. Synth. Catal.* **2015**, *357*, 3104-3108. doi:10.1002/adsc.201500521
- (19) Wang, Z.; Chen, Z.; Sun, J. Catalytic enantioselective intermolecular desymmetrization of 3-substituted oxetanes. *Angew. Chem., Int. Ed.* **2013**, *52*, 6685-6688. doi:10.1002/anie.201300188
- (20) Cerbai, B.; Solaro, R.; Chiellini, E. Synthesis and characterization of functional polyesters tailored for biomedical applications. *J. Poly Sci. A Poly. Chem.* **2008**, *46*, 2459-2476. doi:10.1002/pola.22579

- (21) Heidel, H.; Huttner, G.; Vogel, R.; Helmchen, G. Ein neuartiger chiraler Synthesebaustein mit Neopentangerüst: Chemo-enzymatische Darstellung von (*R*)-CH<sub>3</sub>C(CH<sub>2</sub>OSO<sub>2</sub>CF<sub>3</sub>)(CH<sub>2</sub>Cl)(CH<sub>2</sub>Br). *Chem. Ber.* **1994**, *127*, 271-274. doi:10.1002/cber.19941270138
- (22) Heidel, H.; Huttner, G.; Zsolnai, L. Synthesis of a new optically active triphosphine with a neopentane backbone. *Z. Naturforsch.* **1995**, *50b*, 729-734. doi:10.1515/znb-1995-0508
- (23) Cahiez, G.; Chaboche, C.; Duplais, C.; Moyeux, A. A new efficient catalytic system for the chemoselective cobalt-catalyzed cross-coupling of aryl Grignard reagents with primary and secondary alkyl bromides. *Org. Lett.* **2009**, *11*, 277-280. doi:10.1021/ol802362e
- (24) Ito, H.; Kubota, K. Copper(I)-catalyzed boryl substitution of unactivated alkyl halides. *Org. Lett.* **2012**, *14*, 890-893. doi:10.1021/ol203413w
- (25) Bruker AXS APEX3, Bruker AXS, Madison, Wisconsin, 2015.
- (26) Sheldrick, G. M. *SHELXT* – Integrated space-group and crystal-structure determination. *Acta Cryst.* **2015**, *A71*, 3-8. doi:10.1107/S2053273314026370
- (27) Sheldrick, G. M. Crystal structure refinement with *SHELXL*. *Acta Cryst.* **2015**, *C71*, 3-8. doi:10.1107/S2053229614024218
- (28) Dolomanov, O. V.; Bourhis, L. J.; Gildea, R. J.; Howard, J. A. K.; Puschmann, H. *OLEX2*: A complete structure solution, refinement, and analysis program. *J. Appl. Cryst.* **2009**, *42*, 339-341. doi:10.1107/S0021889808042726
- (29) Accelrys DS Visualizer v2.0.1, Accelrys Software, Inc., 2007.
- (30) Bruker AXS APEX3, Bruker AXS, Madison, Wisconsin, 2016.
